# Supplementary material for: Synergistic Experimental and Computational Investigation of the Bioorthogonal Reactivity of Substituted Aryltetrazines
Source: PubMed Central journal article supplement — Bioconjug Chem. 2022 Mar 15;33(4):608–24. doi: 10.1021/acs.bioconjchem.2c00042 (PMC9026259; doi:10.1021/acs.bioconjchem.2c00042), 2022-03-15
Supplement: bc2c00042_si_002.pdf [file bc2c00042_si_002.pdf]

# Supporting Information

## Synergistic Experimental and Computational Investigation of the Bioorthogonal Reactivity of Substituted Aryltetrazines

Umberto M. Battisti<sup>†a</sup>, Rocío García-Vázquez<sup>†a,b</sup>, Dennis Svatunek<sup>c</sup>, Barbara Herrmann<sup>c</sup>, Andreas Löffler<sup>c</sup>, Hannes Mikula<sup>c</sup>, Matthias Manfred Herth<sup>\*a,b</sup>

<sup>a</sup>Department of Drug Design and Pharmacology, Faculty of Health and Medical Sciences, University of Copenhagen, Jagtvej 160, 2100 Copenhagen; <sup>b</sup>Department of Clinical Physiology, Nuclear Medicine & PET, Rigshospitalet, Blegdamsvej 9, 2100 Copenhagen, Denmark; <sup>c</sup>Institute of Applied Synthetic Chemistry, Technische Universität Wien (TU Wien), Getreidemarkt 9, 1060 Vienna, Austria;

<sup>†</sup>These authors contributed equally

\*Corresponding Author: matthias.herth@sund.ku.dk; Phone: +45 35 33 66 24

<sup>†</sup>These authors contributed equally to the work

### Table of Contents

|                                                |    |
|------------------------------------------------|----|
| • Section S1: Supplementary Tables and Figures | 2  |
| • Section S2: NMR Spectra                      | 7  |
| • Section S3: Analytical HPLC Chromatograms    | 79 |

**Figure S1.** Stopped-flow data for tetrazines **2a-c** and **5a-c** with **axTCO-PEG<sub>4</sub>** in DPBS at 37 °C. Red line indicates the exponential decay fit.

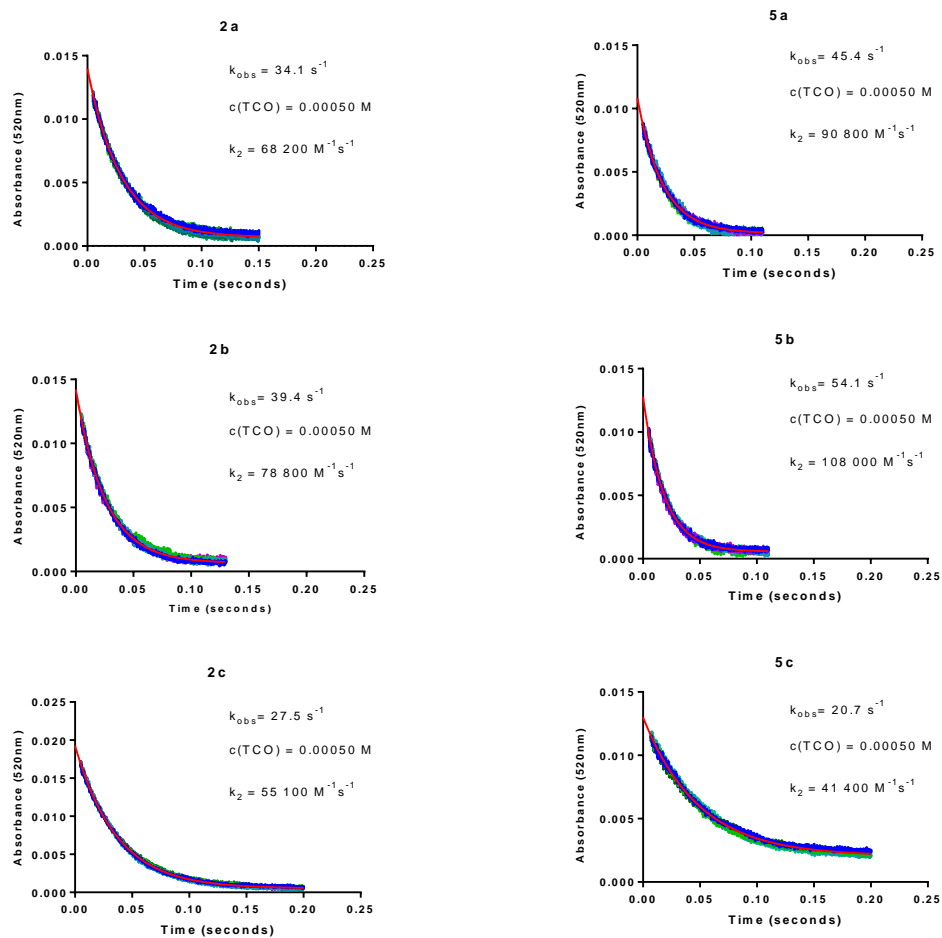

**Table S1.** Hammett constant and Upsilon parameter values employed in the correlations for the synthesized tetrazines

| <b>Substituent<br/>(R)</b>       | <b>Hammett<br/>constant <math>\delta_m</math></b> | <b>Hammett<br/>constant <math>\delta_p</math></b> | <b>Upsilon steric<br/>parameter</b> |
|----------------------------------|---------------------------------------------------|---------------------------------------------------|-------------------------------------|
| -CH <sub>3</sub>                 | -0.07                                             | -0.17                                             | 0.52                                |
| -CF <sub>3</sub>                 | 0.43                                              | 0.54                                              | -                                   |
| -CH <sub>2</sub> NH <sub>2</sub> | -0.03                                             | -0.11                                             | 0.54                                |
| -Cl                              | 0.37                                              | 0.23                                              | 0.55                                |
| -Br                              | 0.39                                              | 0.23                                              | 0.65                                |
| -I                               | 0.35                                              | 0.18                                              | 0.78                                |
| -OH                              | 0.12                                              | -0.37                                             | 0.32                                |
| -OCH <sub>3</sub>                | 0.12                                              | -0.27                                             | 0.36                                |
| -COOH                            | 0.37                                              | 0.45                                              | -                                   |
| -COOCH <sub>3</sub>              | 0.37                                              | 0.45                                              | -                                   |
| -COOtBu                          | 0.37                                              | 0.45                                              | -                                   |
| -CONH <sub>2</sub>               | 0.28                                              | 0.36                                              | -                                   |
| -CONHCH <sub>3</sub>             | 0.35                                              | 0.36                                              | -                                   |
| -NH <sub>2</sub>                 | -0.16                                             | -0.66                                             | -                                   |
| -NHCOCH <sub>3</sub>             | 0.21                                              | 0.00                                              | -                                   |
| -SO <sub>2</sub> NH <sub>2</sub> | 0.53                                              | 0.60                                              | -                                   |
| -O <sup>-</sup>                  | -0.47                                             | -0.81                                             | -                                   |
| -COO <sup>-</sup>                | -0.10                                             | 0.00                                              | -                                   |

**Table S2:**  $\omega$ B97X-D/def2-TZVPD calculated gas phase energies.

| Structure    | E / hartree  | ZPE / hartree | H / hartree  | T*S / hartree | G / hartree  |
|--------------|--------------|---------------|--------------|---------------|--------------|
| <b>2a</b>    | -665.964631  | 0.153462      | -665.799118  | 0.048974      | -665.848092  |
| <b>2b</b>    | -665.963571  | 0.153105      | -665.798244  | 0.049238      | -665.847482  |
| <b>2c</b>    | -665.958262  | 0.153697      | -665.792788  | 0.048351      | -665.841139  |
| <b>3a</b>    | -963.744199  | 0.130388      | -963.599880  | 0.053238      | -963.653118  |
| <b>3b</b>    | -963.747345  | 0.130233      | -963.603119  | 0.053368      | -963.656488  |
| <b>4a</b>    | -721.316889  | 0.171779      | -721.131932  | 0.051253      | -721.183185  |
| <b>4b</b>    | -721.316192  | 0.171472      | -721.131507  | 0.051406      | -721.182913  |
| <b>4c</b>    | -721.312715  | 0.172108      | -721.127734  | 0.050840      | -721.178574  |
| <b>5a</b>    | -1086.250397 | 0.116040      | -1086.122794 | 0.048362      | -1086.171156 |
| <b>5b</b>    | -1086.252840 | 0.115990      | -1086.125315 | 0.048483      | -1086.173798 |
| <b>6a</b>    | -3200.254160 | 0.115459      | -3200.126885 | 0.049524      | -3200.176410 |
| <b>6b</b>    | -3200.256154 | 0.115369      | -3200.128982 | 0.049758      | -3200.178740 |
| <b>6c</b>    | -3200.247716 | 0.115150      | -3200.120727 | 0.049676      | -3200.170403 |
| <b>7a</b>    | -923.822897  | 0.115105      | -923.695817  | 0.050390      | -923.746208  |
| <b>7b</b>    | -923.823858  | 0.114859      | -923.697010  | 0.050626      | -923.747637  |
| <b>7c</b>    | -923.815625  | 0.114752      | -923.688866  | 0.050501      | -923.739367  |
| <b>8a</b>    | -701.878566  | 0.130427      | -701.736721  | 0.047565      | -701.784285  |
| <b>8b</b>    | -701.878516  | 0.130055      | -701.736988  | 0.047723      | -701.784711  |
| <b>8c</b>    | -701.883733  | 0.130804      | -701.741883  | 0.046965      | -701.788848  |
| <b>9a</b>    | -741.175366  | 0.158643      | -741.003811  | 0.050892      | -741.054703  |
| <b>9b</b>    | -741.179248  | 0.158468      | -741.007889  | 0.050981      | -741.058870  |
| <b>9c</b>    | -741.169749  | 0.158092      | -740.998653  | 0.051143      | -741.049796  |
| <b>TCO</b>   | -313.264541  | 0.205207      | -313.050886  | 0.039615      | -313.090501  |
| <b>2a_TS</b> | -979.222821  | 0.361047      | -978.842023  | 0.064055      | -978.906078  |
| <b>2b_TS</b> | -979.222209  | 0.360605      | -978.841640  | 0.064247      | -978.905886  |
| <b>2c_TS</b> | -979.217450  | 0.361228      | -978.836712  | 0.063290      | -978.900002  |
| <b>3a_TS</b> | -1277.004133 | 0.338045      | -1276.644432 | 0.068072      | -1276.712505 |
| <b>3b_TS</b> | -1277.007350 | 0.338052      | -1276.647615 | 0.067876      | -1276.715491 |
| <b>4a_TS</b> | -1034.575467 | 0.379496      | -1034.175117 | 0.066182      | -1034.241299 |
| <b>4b_TS</b> | -1034.575058 | 0.379030      | -1034.175082 | 0.066219      | -1034.241300 |
| <b>4c_TS</b> | -1034.572936 | 0.379785      | -1034.172581 | 0.065538      | -1034.238118 |
| <b>5a_TS</b> | -1399.509387 | 0.323885      | -1399.166289 | 0.063238      | -1399.229528 |
| <b>5b_TS</b> | -1399.512396 | 0.323766      | -1399.169424 | 0.063131      | -1399.232554 |
| <b>6a_TS</b> | -3513.513268 | 0.323205      | -3513.170541 | 0.064406      | -3513.234947 |
| <b>6b_TS</b> | -3513.515804 | 0.323071      | -3513.173213 | 0.064303      | -3513.237516 |
| <b>6c_TS</b> | -3513.508521 | 0.323042      | -3513.165963 | 0.064218      | -3513.230181 |
| <b>7a_TS</b> | -1237.082057 | 0.322779      | -1236.739591 | 0.065222      | -1236.804813 |
| <b>7b_TS</b> | -1237.083567 | 0.322672      | -1236.741198 | 0.065062      | -1236.806260 |
| <b>7c_TS</b> | -1237.076513 | 0.322565      | -1236.734281 | 0.064825      | -1236.799105 |
| <b>8a_TS</b> | -1015.136041 | 0.337882      | -1014.778996 | 0.062692      | -1014.841688 |
| <b>8b_TS</b> | -1015.137498 | 0.337634      | -1014.780659 | 0.062687      | -1014.843345 |
| <b>8c_TS</b> | -1015.143168 | 0.338479      | -1014.785911 | 0.061956      | -1014.847867 |
| <b>9a_TS</b> | -1054.432817 | 0.366347      | -1054.045903 | 0.065679      | -1054.111582 |
| <b>9b_TS</b> | -1054.438166 | 0.366153      | -1054.051443 | 0.065646      | -1054.117090 |
| <b>9c_TS</b> | -1054.430152 | 0.365725      | -1054.043736 | 0.065800      | -1054.109537 |



**Table S3:**  $\omega$ B97X-D/def2-TZVPD calculated energies in SMD water.

| Structure          | E / hartree  | ZPE / hartree | H / hartree  | T*S / hartree | G / hartree  |
|--------------------|--------------|---------------|--------------|---------------|--------------|
| <b>2a</b>          | -665.975776  | 0.15318       | -665.810477  | 0.04897       | -665.859446  |
| <b>2b</b>          | -665.974655  | 0.152753      | -665.810496  | 0.047686      | -665.858182  |
| <b>2c</b>          | -665.971175  | 0.153338      | -665.805881  | 0.048863      | -665.854744  |
| <b>3a</b>          | -963.753922  | 0.129972      | -963.610826  | 0.051726      | -963.662551  |
| <b>3b</b>          | -963.757087  | 0.129938      | -963.614017  | 0.051804      | -963.665821  |
| <b>4a</b>          | -721.335815  | 0.171655      | -721.150934  | 0.051261      | -721.202196  |
| <b>4b</b>          | -721.335621  | 0.171598      | -721.150843  | 0.051407      | -721.20225   |
| <b>4c</b>          | -721.332377  | 0.171989      | -721.1474    | 0.051171      | -721.198571  |
| <b>5a</b>          | -1086.261528 | 0.115987      | -1086.134817 | 0.046783      | -1086.181601 |
| <b>5b</b>          | -1086.263915 | 0.115878      | -1086.137321 | 0.046929      | -1086.184251 |
| <b>6a</b>          | -3200.266076 | 0.115377      | -3200.13971  | 0.047978      | -3200.187688 |
| <b>6b</b>          | -3200.268005 | 0.115314      | -3200.140834 | 0.049811      | -3200.190645 |
| <b>6c</b>          | -3200.262682 | 0.115207      | -3200.135569 | 0.049802      | -3200.185371 |
| <b>7a</b>          | -923.836362  | 0.114902      | -923.710319  | 0.048843      | -923.759162  |
| <b>7b</b>          | -923.837003  | 0.114967      | -923.71004   | 0.050642      | -923.760683  |
| <b>7c</b>          | -923.832252  | 0.114928      | -923.705333  | 0.050529      | -923.755862  |
| <b>8a_anion</b>    | -701.425911  | 0.116719      | -701.297945  | 0.047387      | -701.345332  |
| <b>8b</b>          | -701.896358  | 0.129902      | -701.754985  | 0.047636      | -701.802621  |
| <b>8c</b>          | -701.896298  | 0.130094      | -701.755025  | 0.04711       | -701.802135  |
| <b>9a</b>          | -741.188886  | 0.158227      | -741.017626  | 0.051031      | -741.068657  |
| <b>9b</b>          | -741.191292  | 0.15814       | -741.020202  | 0.051109      | -741.071311  |
| <b>9c</b>          | -741.185643  | 0.158158      | -741.014495  | 0.051148      | -741.065644  |
| <b>TCO</b>         | -313.264112  | 0.204539      | -313.051096  | 0.039664      | -313.09076   |
| <b>2a_TS</b>       | -979.239174  | 0.360101      | -978.859167  | 0.064289      | -978.923457  |
| <b>2b_TS</b>       | -979.238594  | 0.35986       | -978.858648  | 0.064394      | -978.923042  |
| <b>2c_TS</b>       | -979.233281  | 0.360818      | -978.85293   | 0.063364      | -978.916293  |
| <b>3a_TS</b>       | -1277.018864 | 0.337091      | -1276.660022 | 0.068271      | -1276.728293 |
| <b>3b_TS</b>       | -1277.021877 | 0.337176      | -1276.662913 | 0.068141      | -1276.731054 |
| <b>4a_TS</b>       | -1034.599283 | 0.378735      | -1034.199509 | 0.066563      | -1034.266073 |
| <b>4b_TS</b>       | -1034.599403 | 0.378484      | -1034.199828 | 0.066476      | -1034.266304 |
| <b>4c_TS</b>       | -1034.595221 | 0.379238      | -1034.195294 | 0.065809      | -1034.261103 |
| <b>5a_TS</b>       | -1399.525761 | 0.323065      | -1399.183317 | 0.063577      | -1399.246894 |
| <b>5b_TS</b>       | -1399.528502 | 0.322802      | -1399.186273 | 0.063605      | -1399.249878 |
| <b>6a_TS</b>       | -3513.530438 | 0.322525      | -3513.188289 | 0.064624      | -3513.252914 |
| <b>6b_TS</b>       | -3513.532739 | 0.322527      | -3513.190604 | 0.064492      | -3513.255097 |
| <b>6c_TS</b>       | -3513.524356 | 0.322157      | -3513.182541 | 0.064487      | -3513.247028 |
| <b>7a_TS</b>       | -1237.100464 | 0.322057      | -1236.758596 | 0.065474      | -1236.82407  |
| <b>7b_TS</b>       | -1237.101561 | 0.321991      | -1236.75979  | 0.065258      | -1236.825048 |
| <b>7c_TS</b>       | -1237.094083 | 0.32207       | -1236.752286 | 0.064949      | -1236.817235 |
| <b>8a_anion_TS</b> | -1014.685258 | 0.323712      | -1014.342527 | 0.062597      | -1014.405124 |
| <b>8b_TS</b>       | -1015.160321 | 0.336688      | -1014.804314 | 0.062894      | -1014.867208 |
| <b>8c_TS</b>       | -1015.16067  | 0.337224      | -1014.804535 | 0.062223      | -1014.866758 |
| <b>9a_TS</b>       | -1054.451683 | 0.365507      | -1054.065478 | 0.065939      | -1054.131417 |
| <b>9b_TS</b>       | -1054.455296 | 0.365309      | -1054.069289 | 0.065863      | -1054.135152 |
| <b>9c_TS</b>       | -1054.449109 | 0.365072      | -1054.063247 | 0.065942      | -1054.129189 |

**Table S4:**  $\omega$ B97X-D/def2-TZVPD calculated barrier heights in kcal/mol.

|           | gas phase | water |
|-----------|-----------|-------|
| <b>2a</b> | 20.4      | 16.8  |
| <b>2b</b> | 20.1      | 16.3  |
| <b>2c</b> | 19.9      | 18.3  |
| <b>3a</b> | 19.5      | 15.7  |
| <b>3b</b> | 19.8      | 16    |
| <b>4a</b> | 20.3      | 16.9  |
| <b>4b</b> | 20.2      | 16.8  |
| <b>5a</b> | 20.2      | 16    |
| <b>5b</b> | 19.9      | 15.8  |
| <b>5c</b> | 19.4      | 17.7  |
| <b>6a</b> | 20.1      | 16    |
| <b>6b</b> | 19.9      | 16.5  |
| <b>6c</b> | 19.3      | 18.3  |
| <b>7a</b> | 20        | 16.2  |
| <b>7b</b> | 20        | 16.6  |
| <b>7c</b> | 19.3      | 18.4  |
| <b>8a</b> | 20.8      | 19.4  |
| <b>8b</b> | 20        | 16.4  |
| <b>8c</b> | 19.8      | 16.4  |
| <b>9a</b> | 21.1      | 17.6  |
| <b>9b</b> | 20.3      | 16.9  |
| <b>9c</b> | 19.3      | 17.1  |

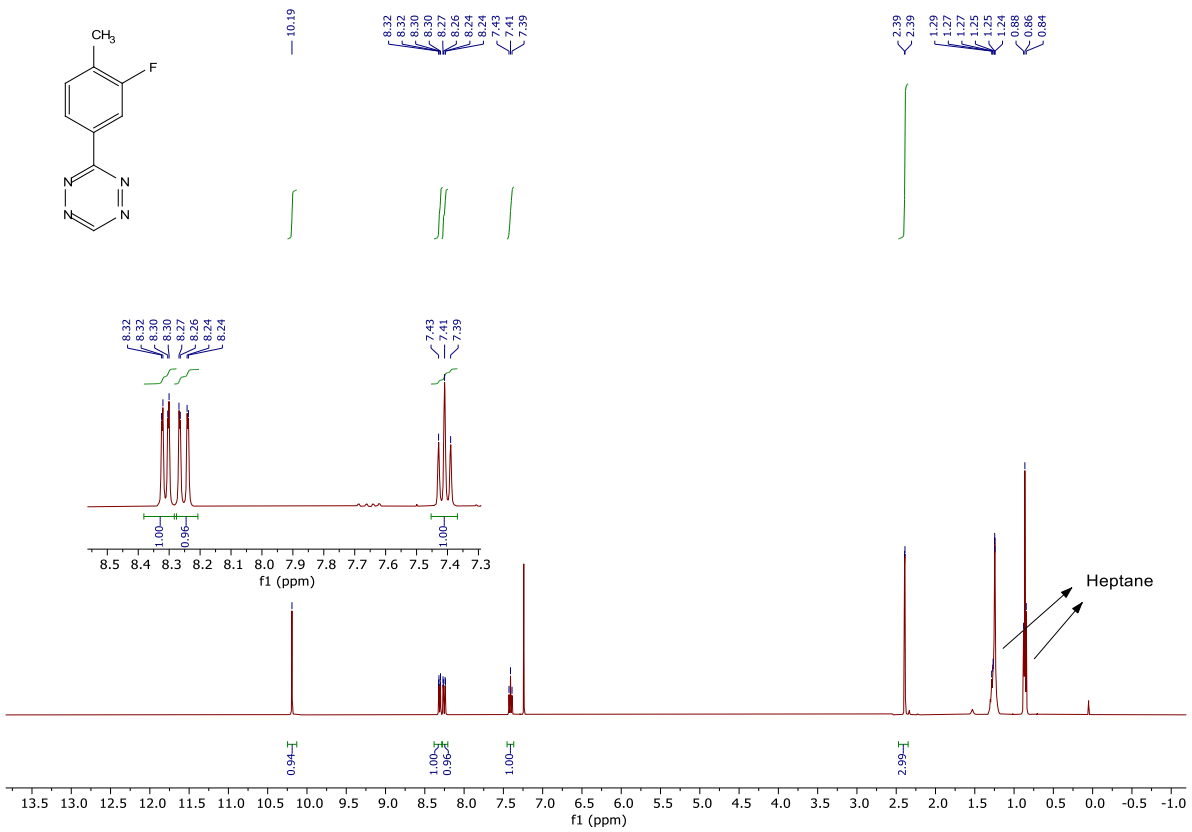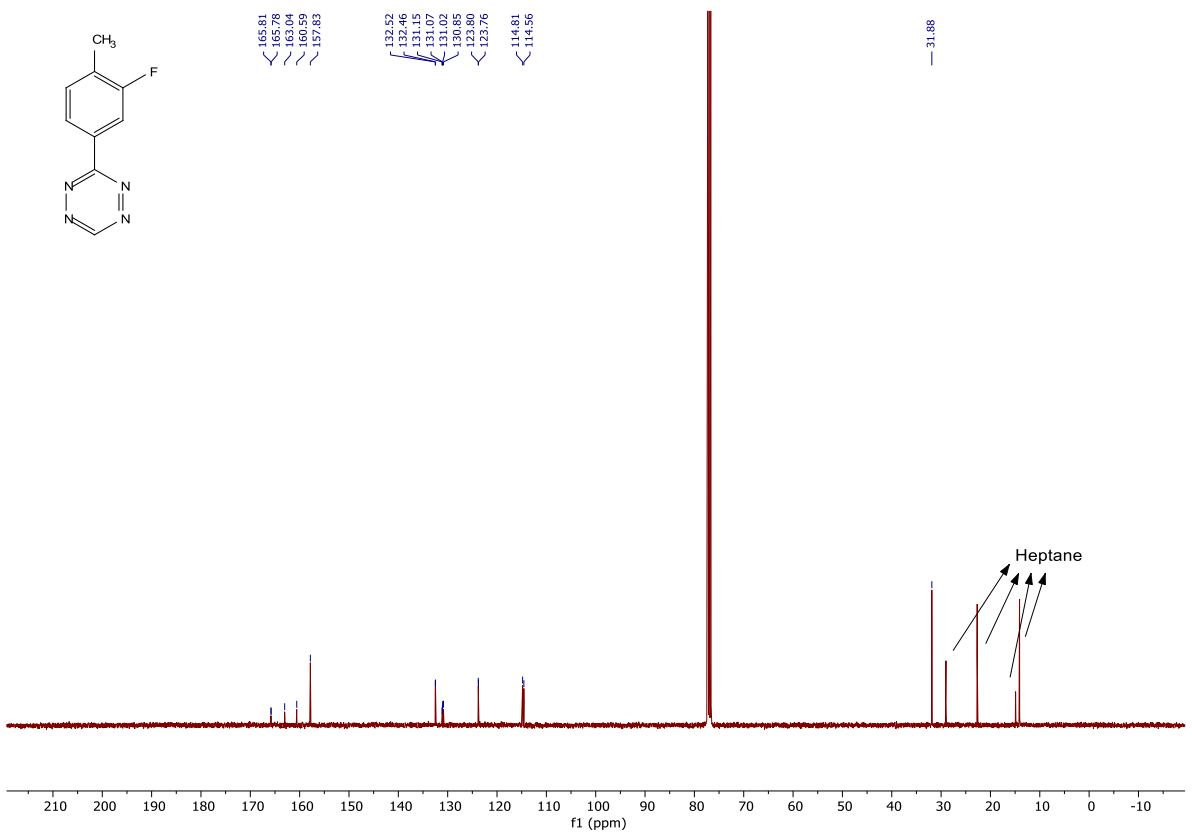

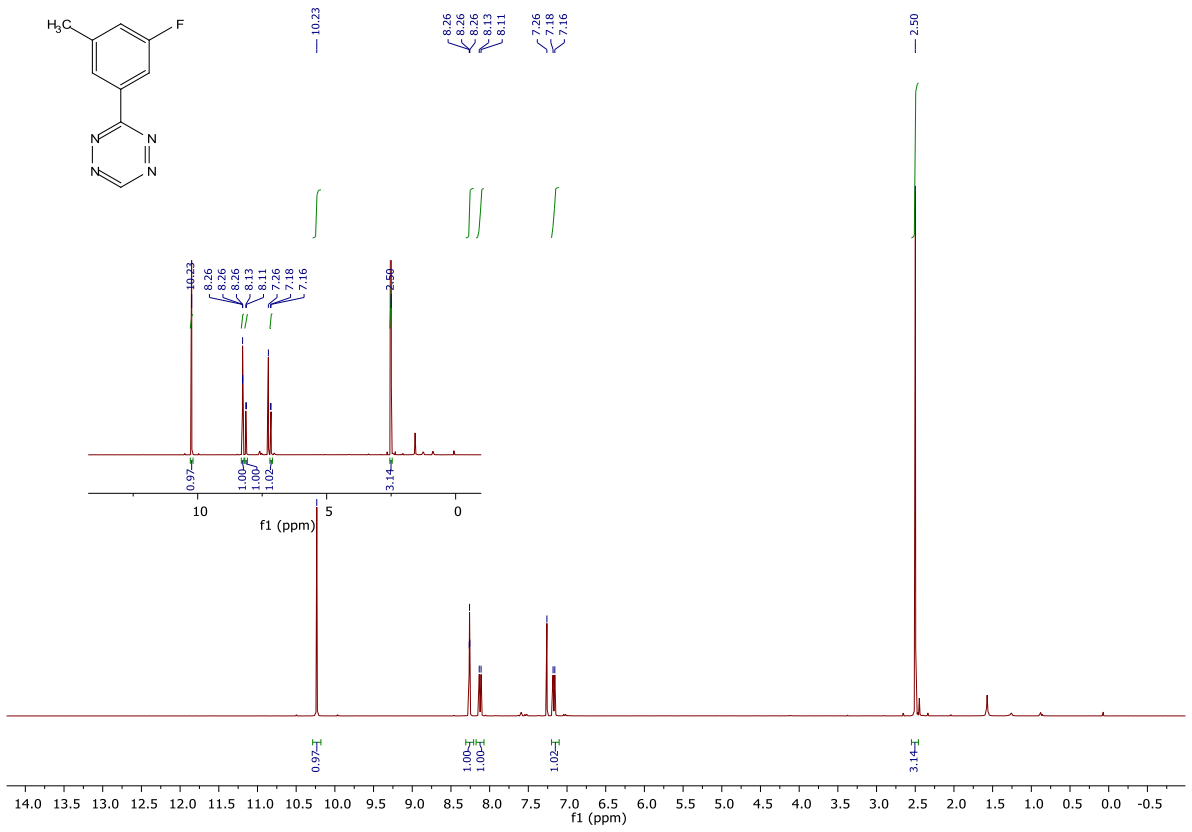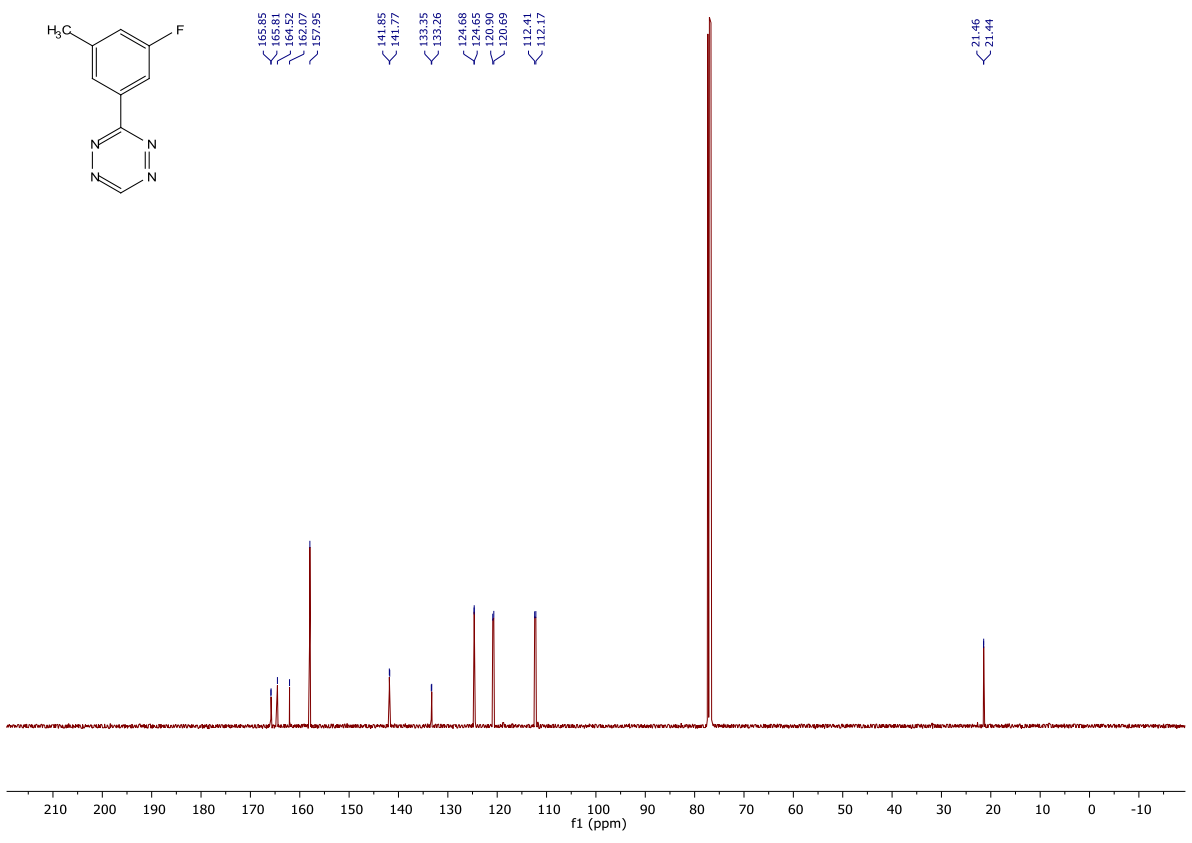

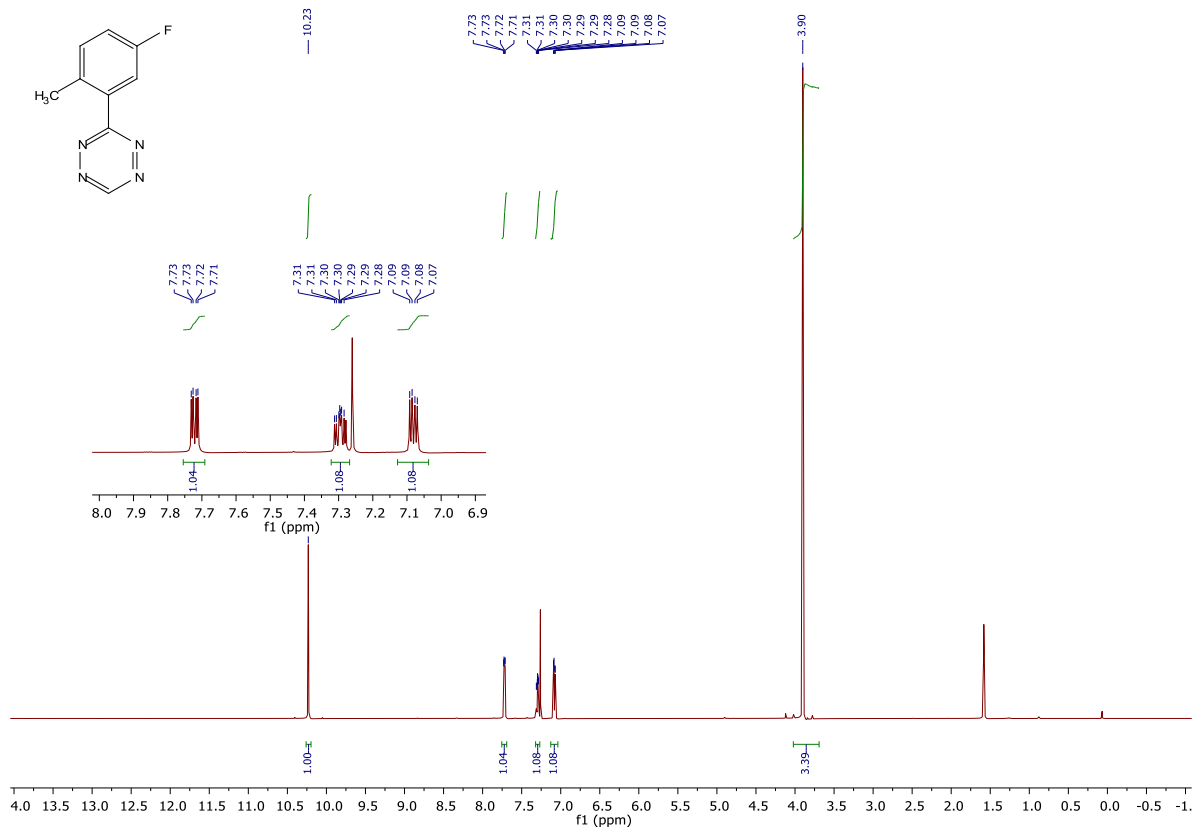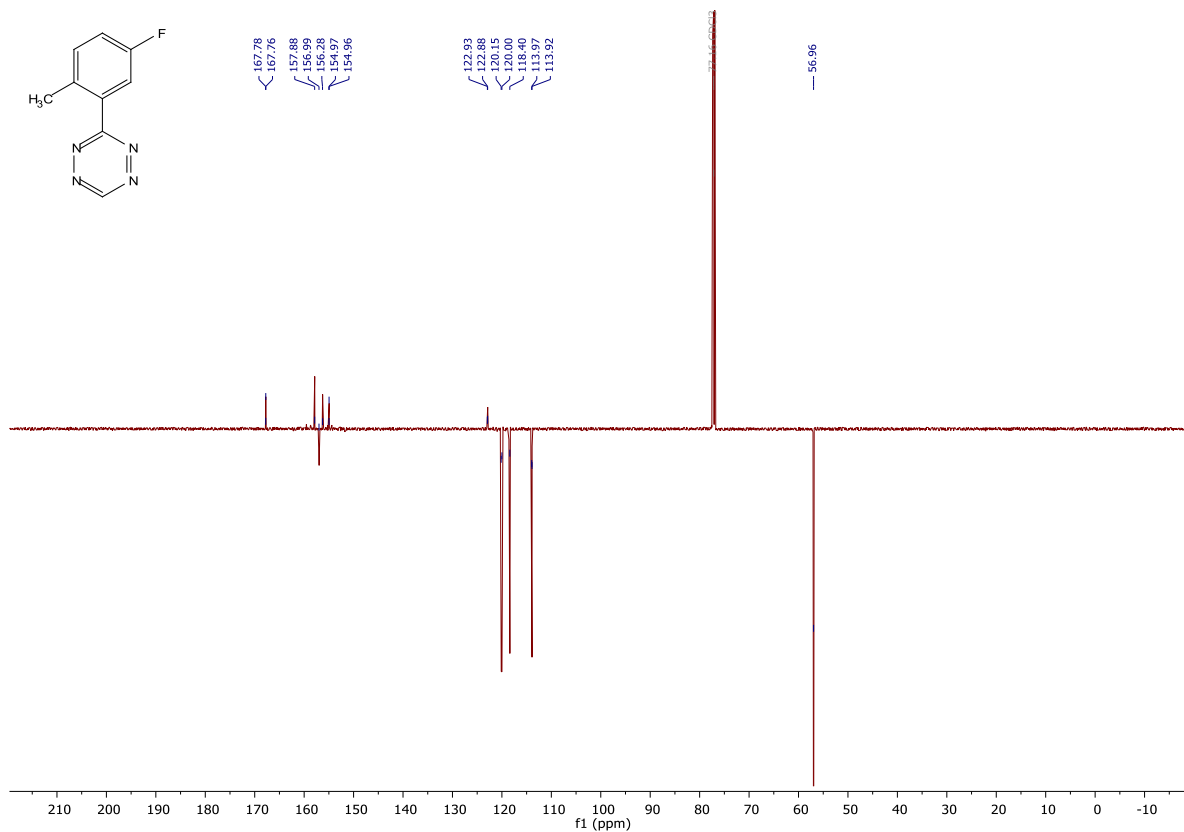

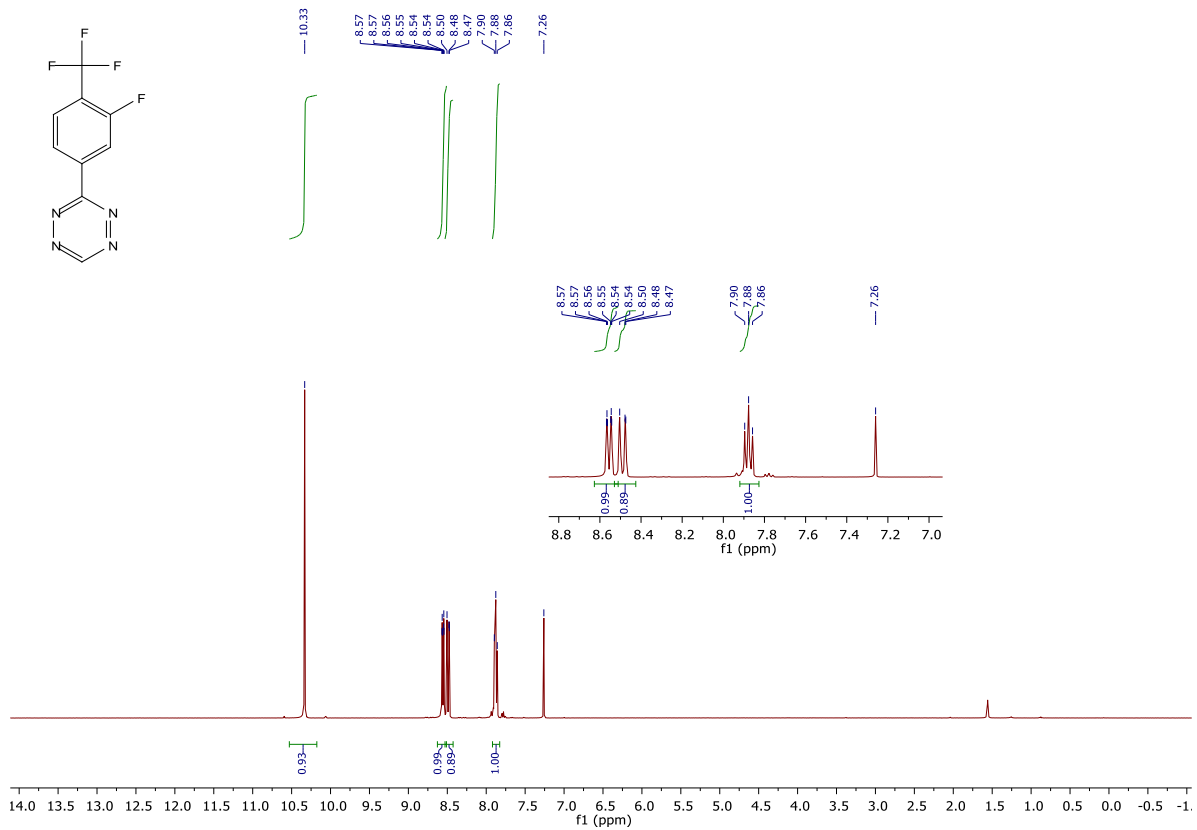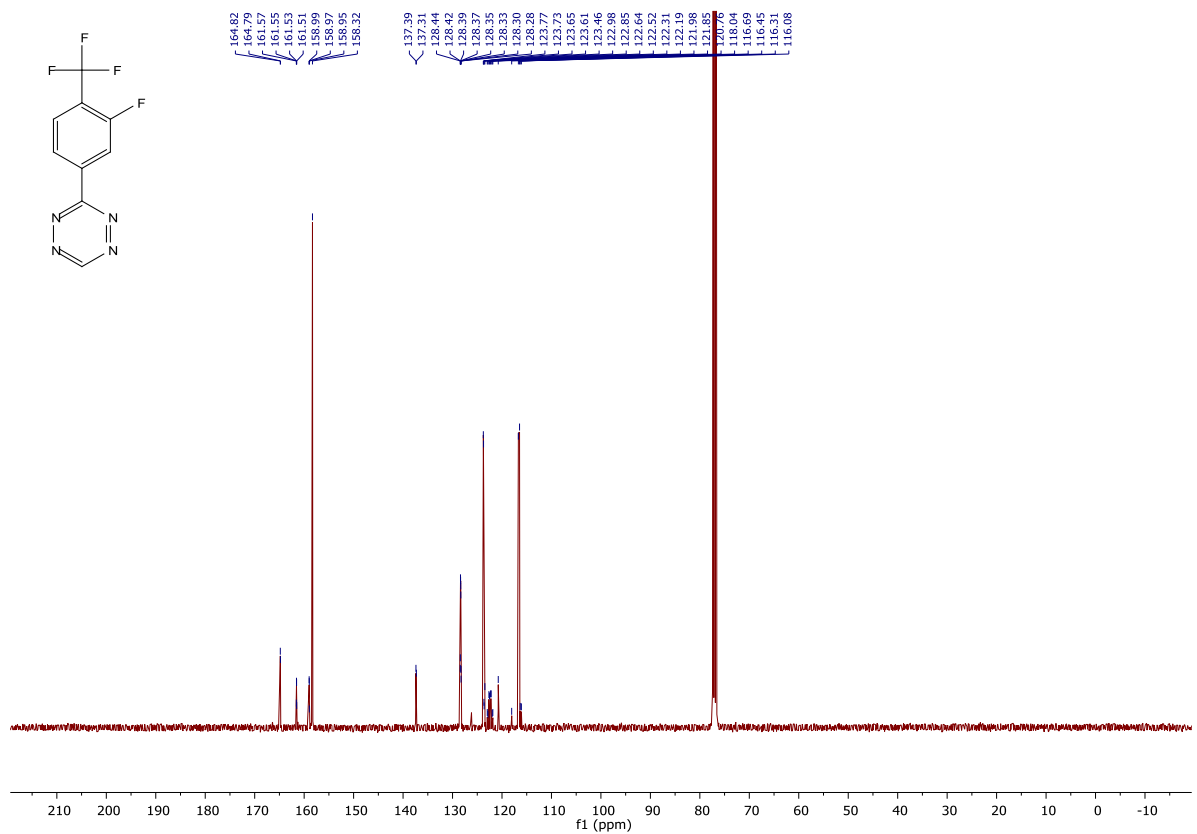

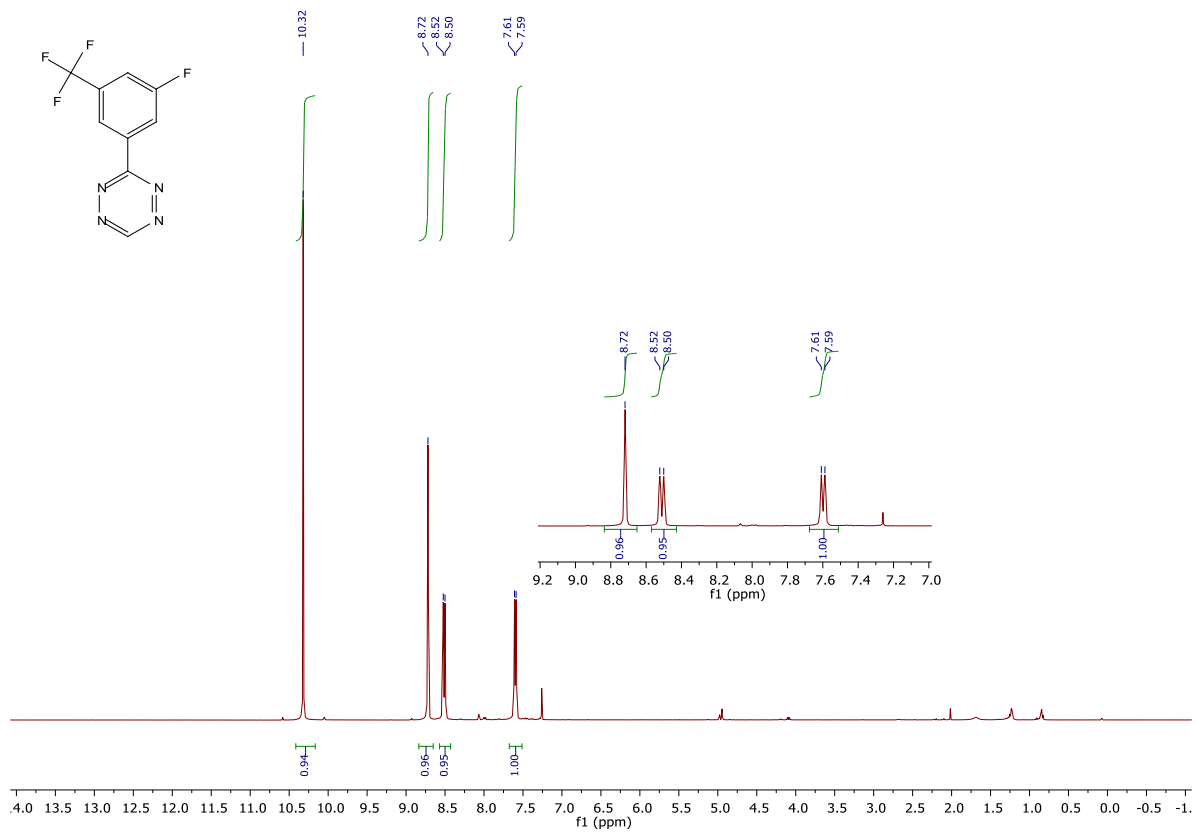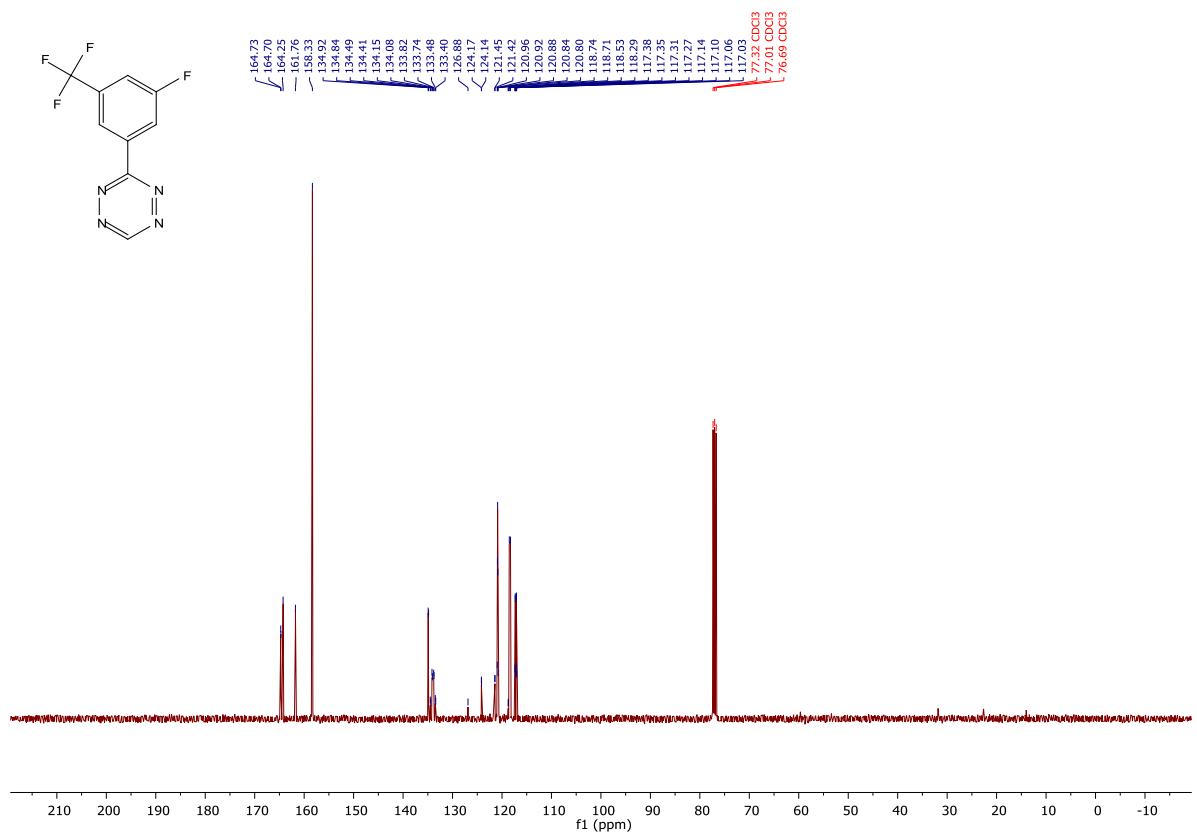

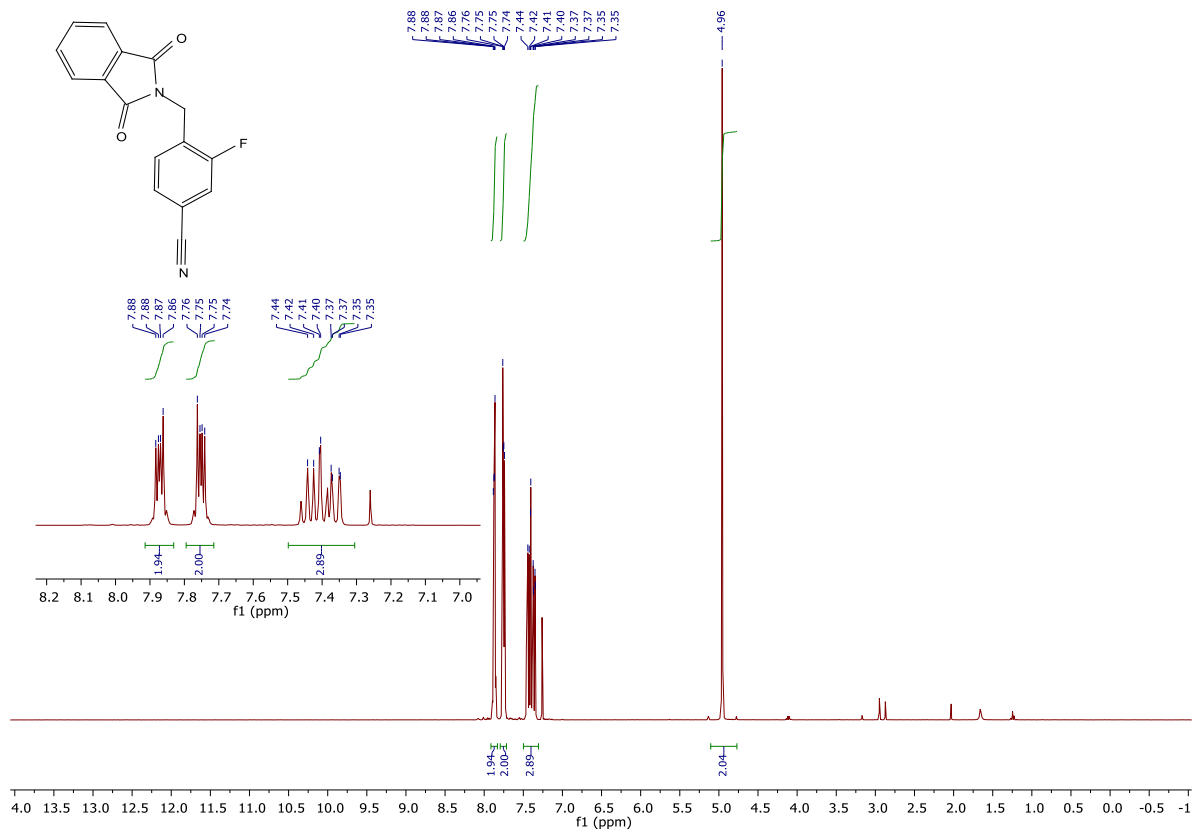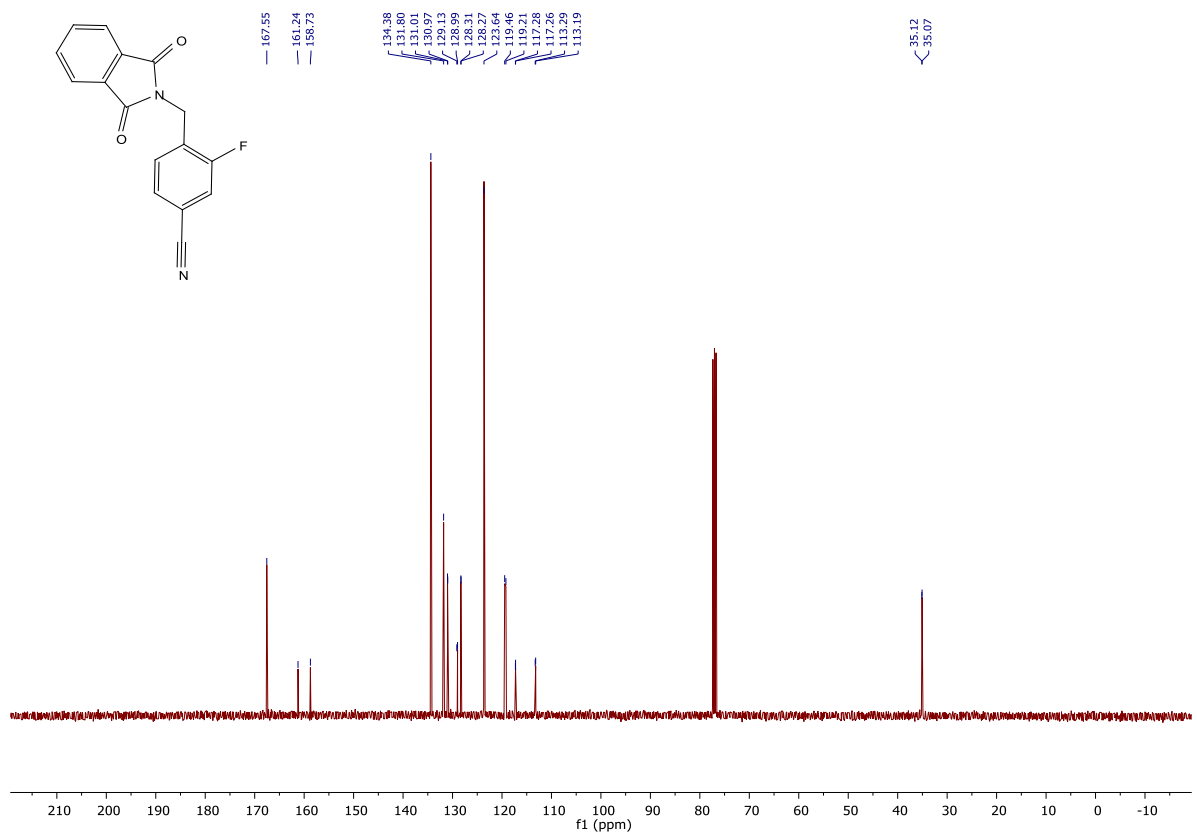



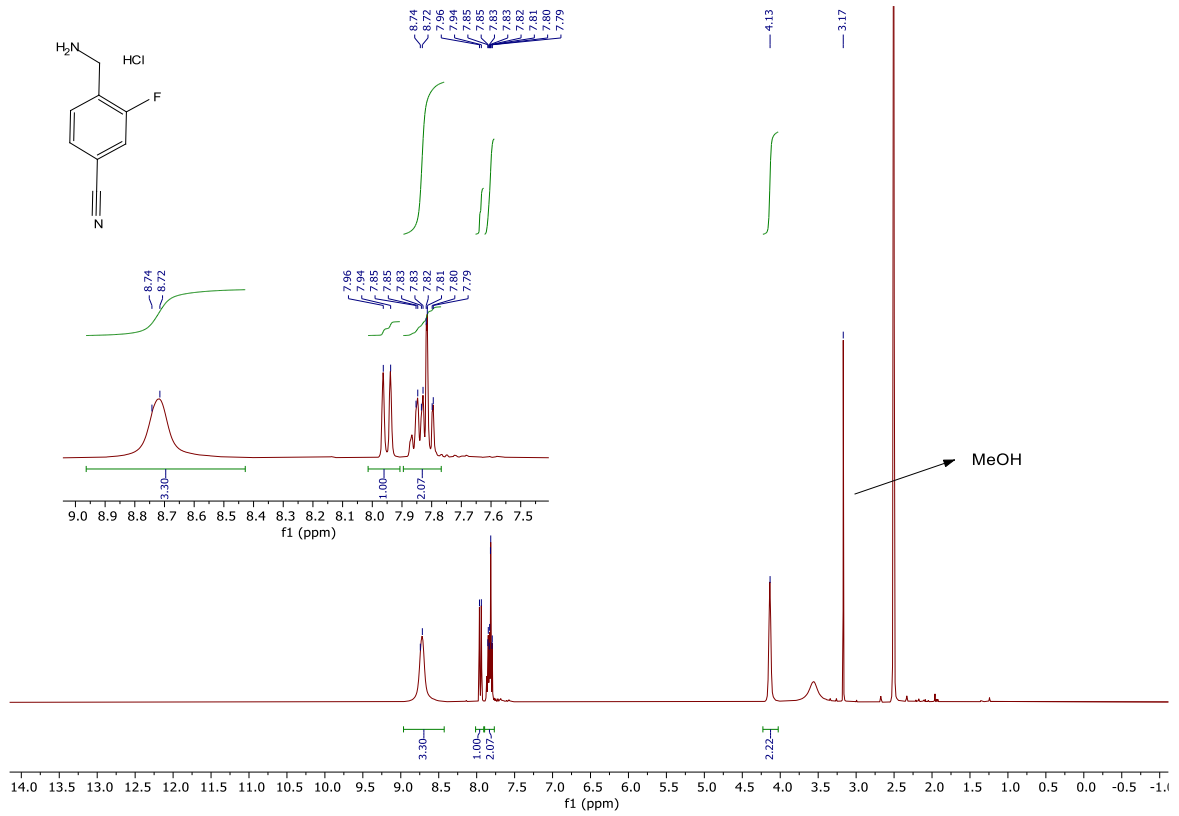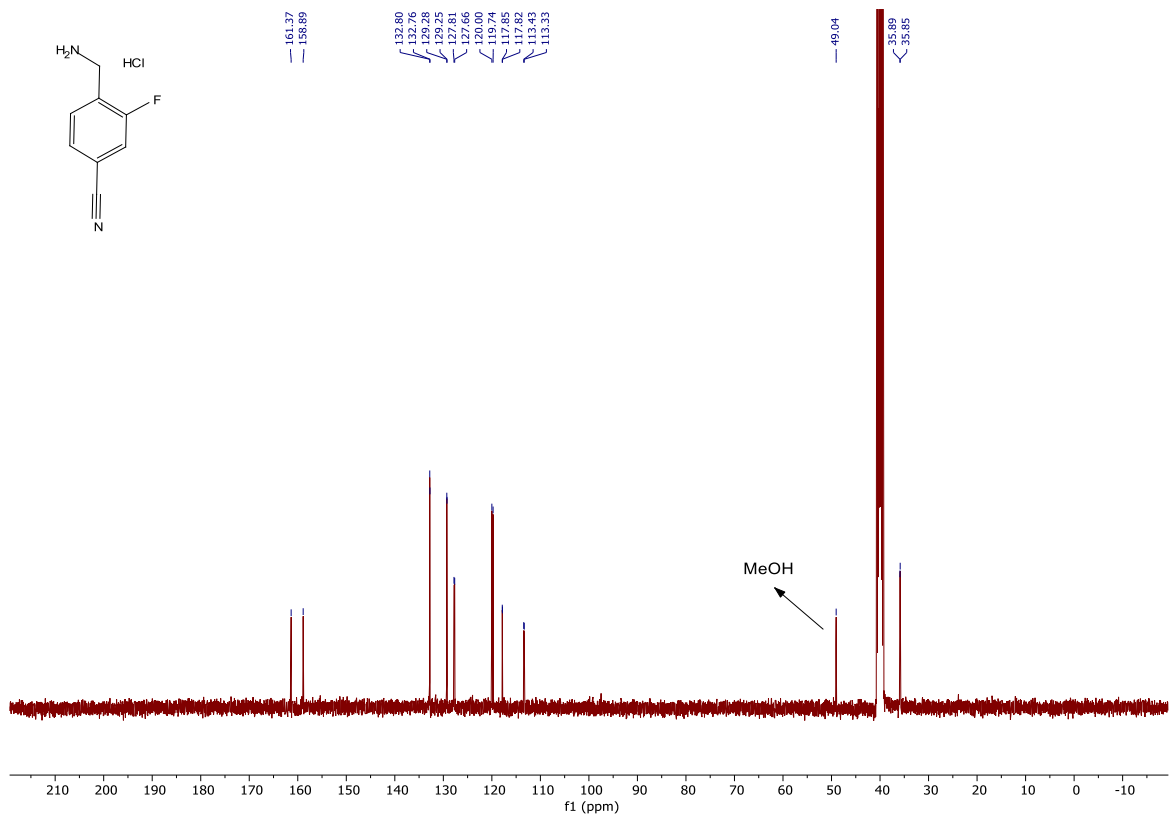

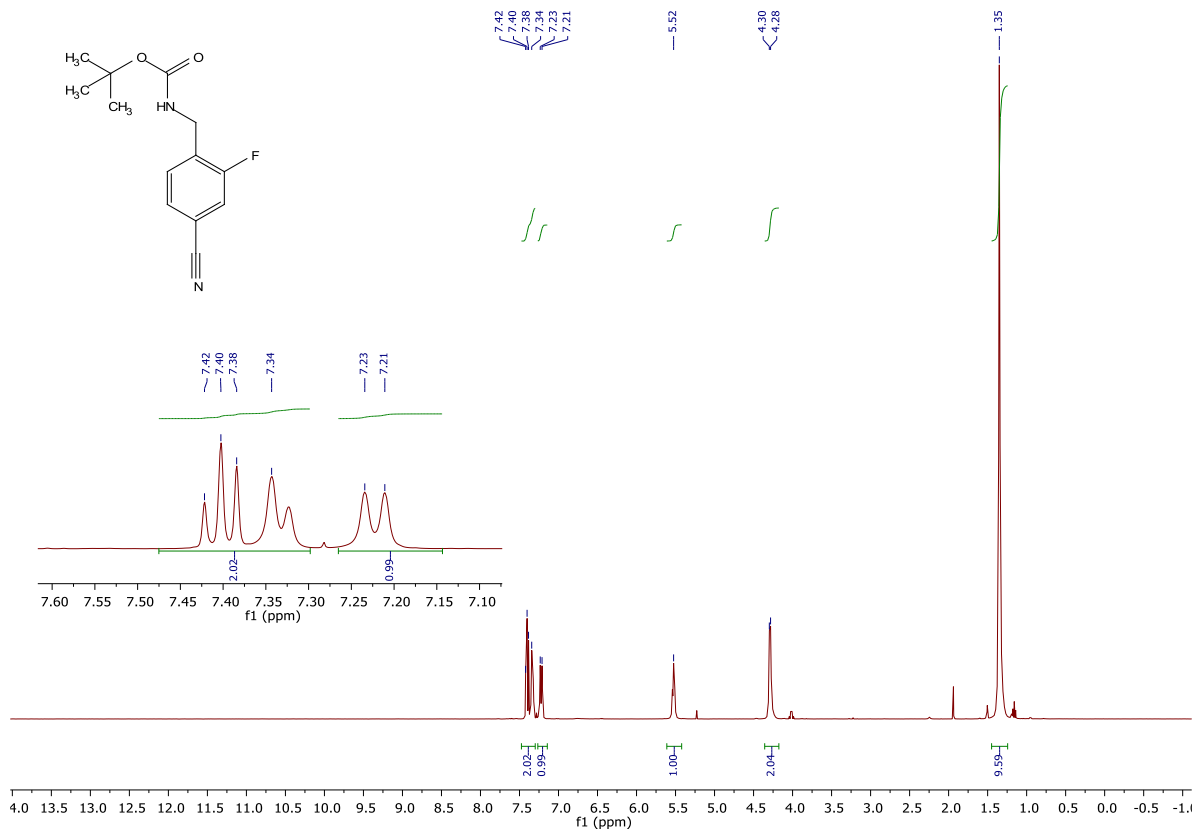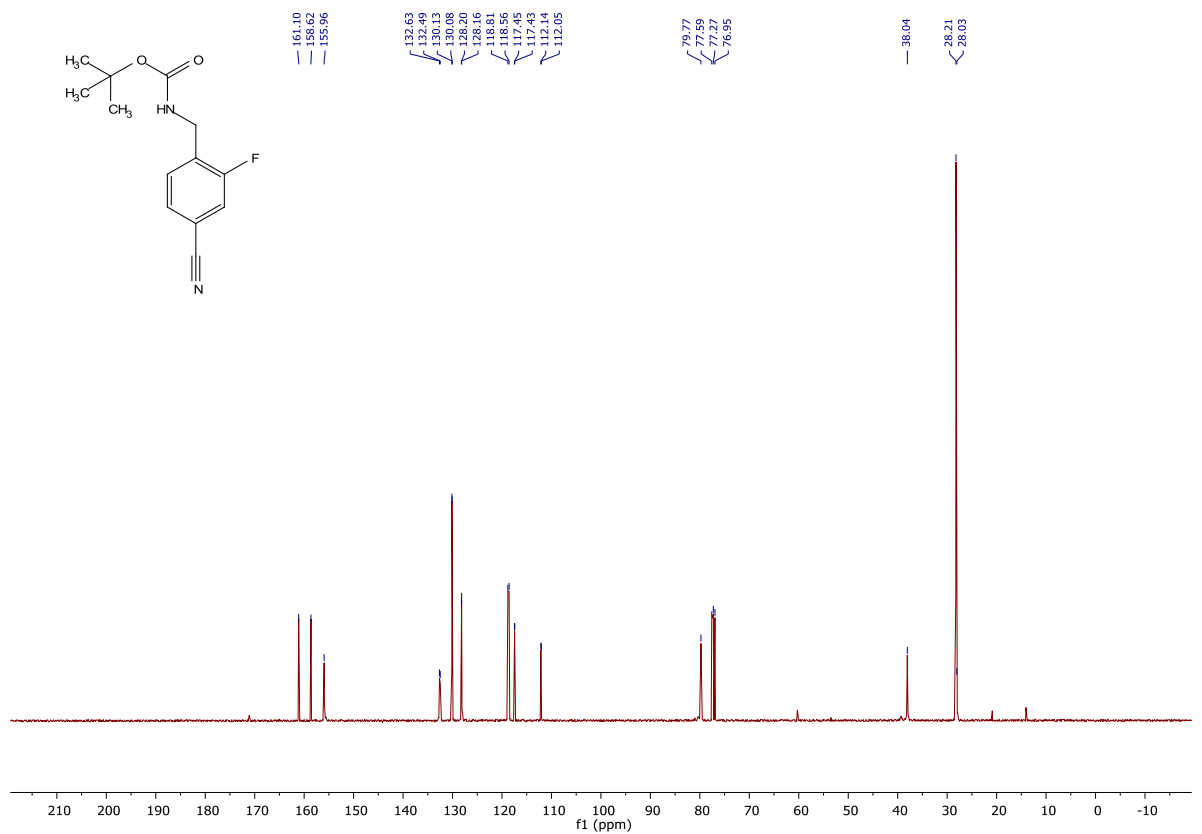

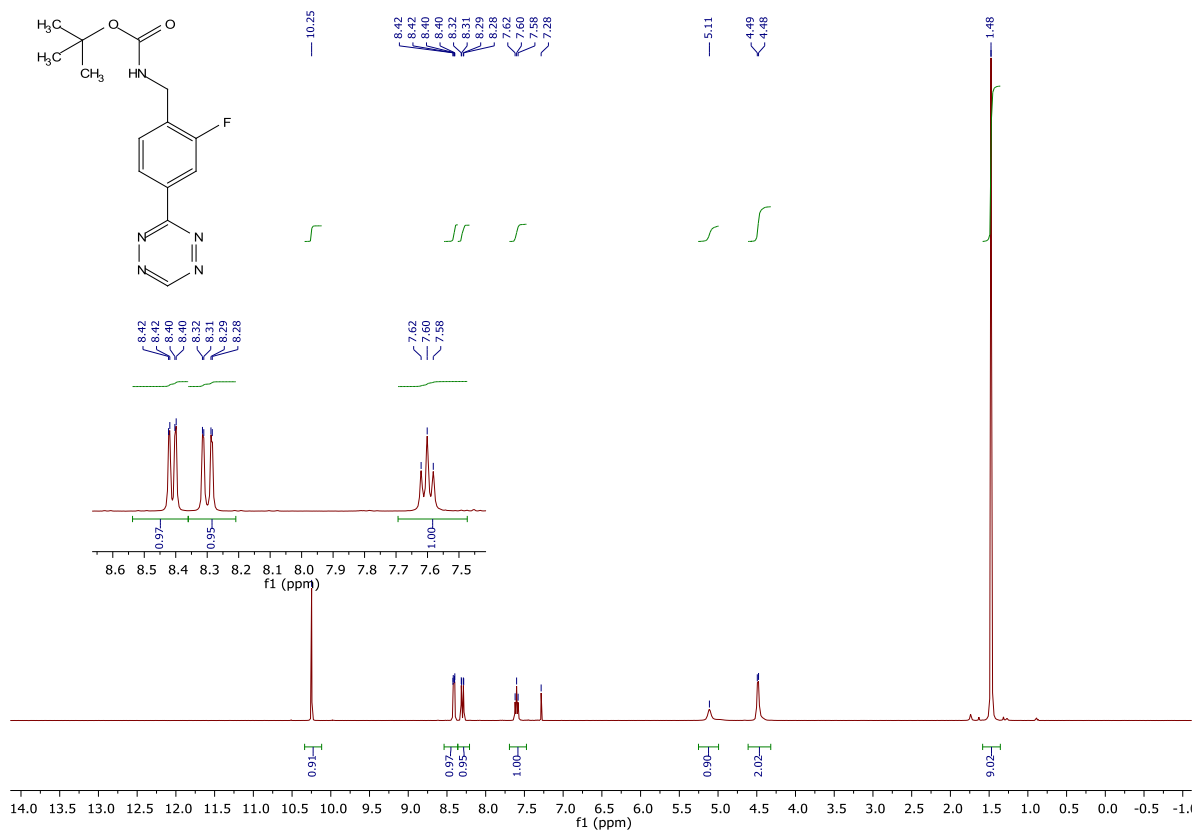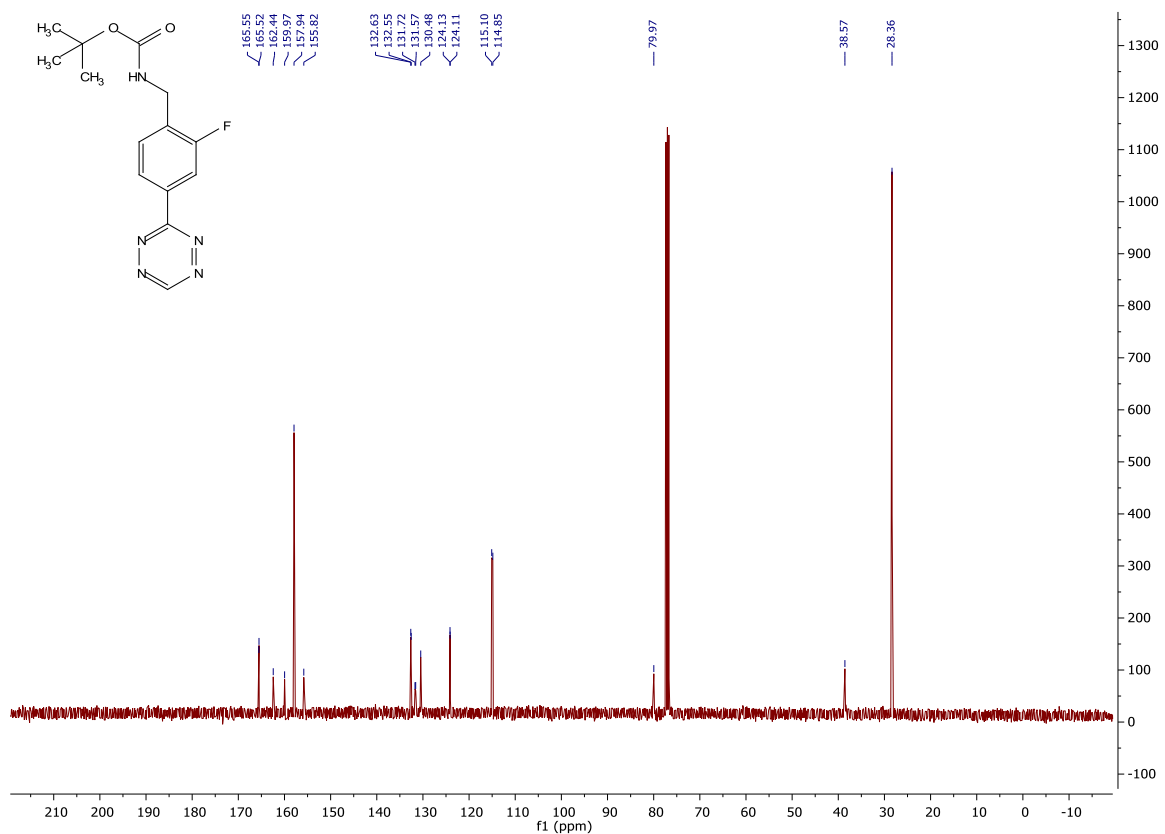

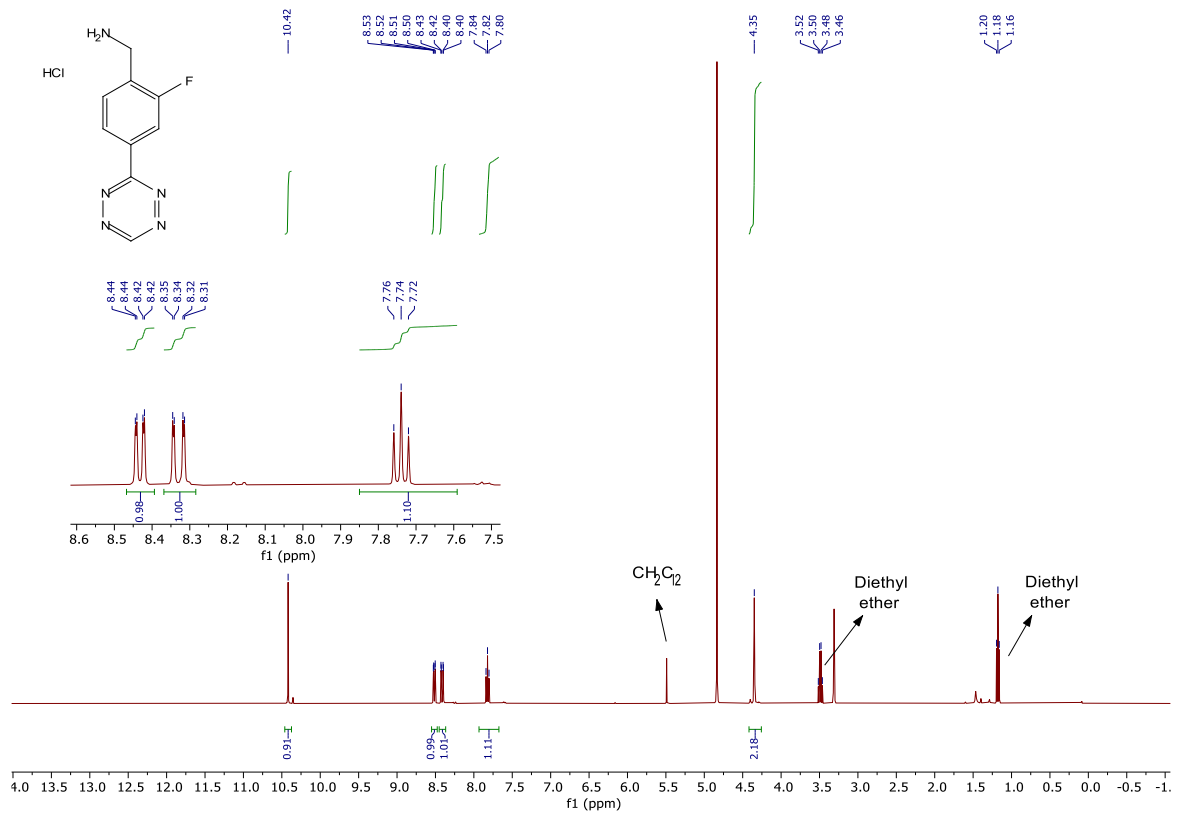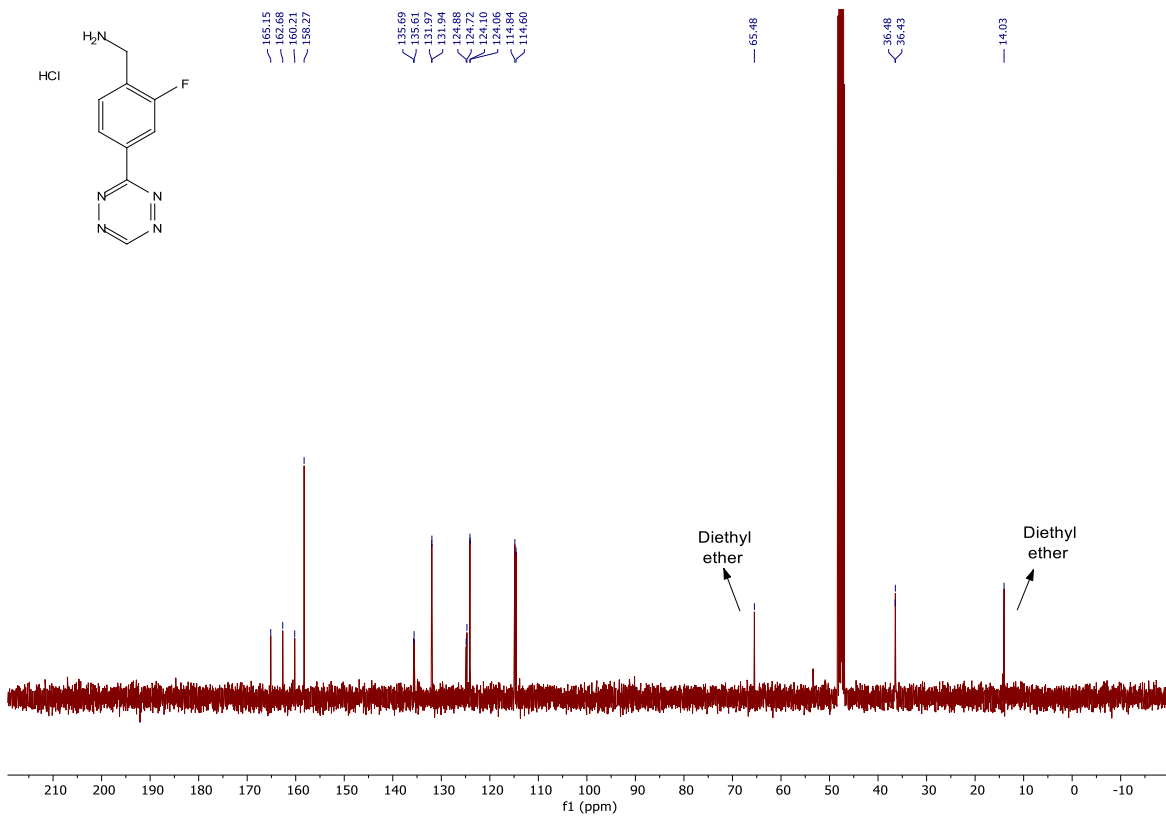

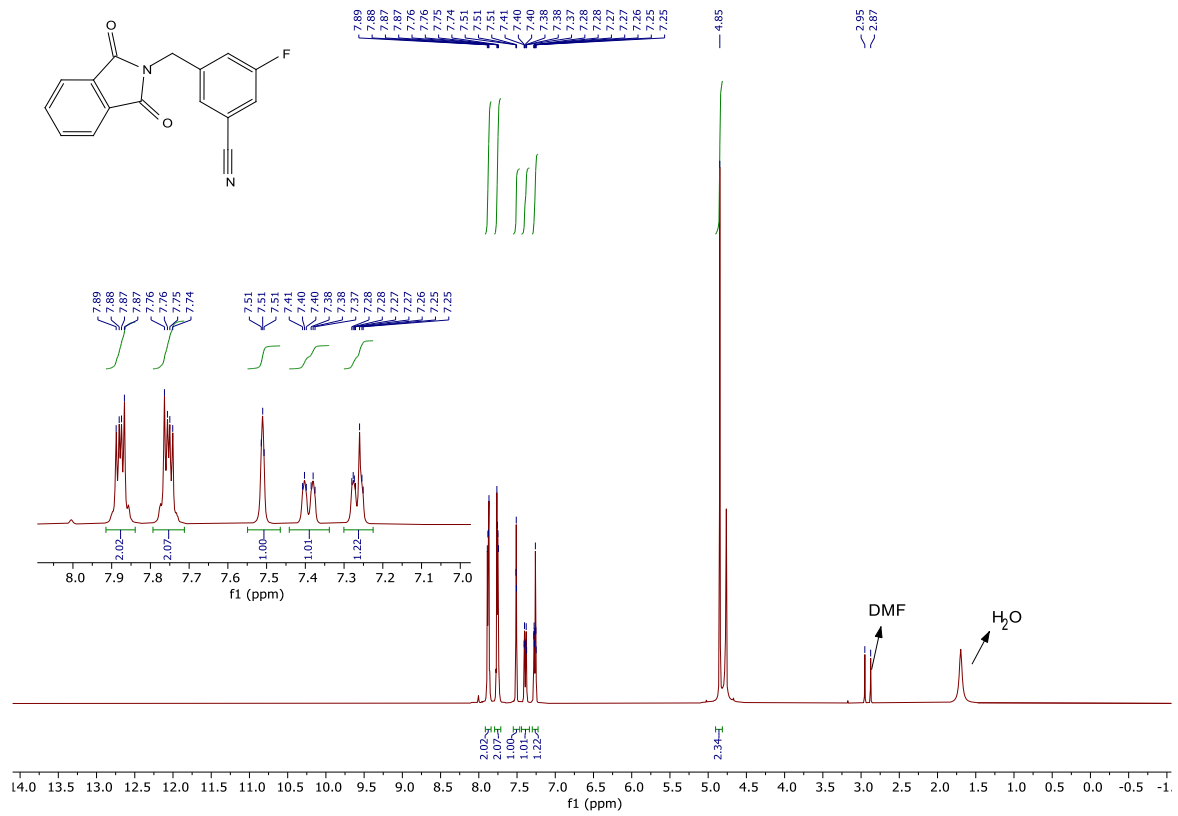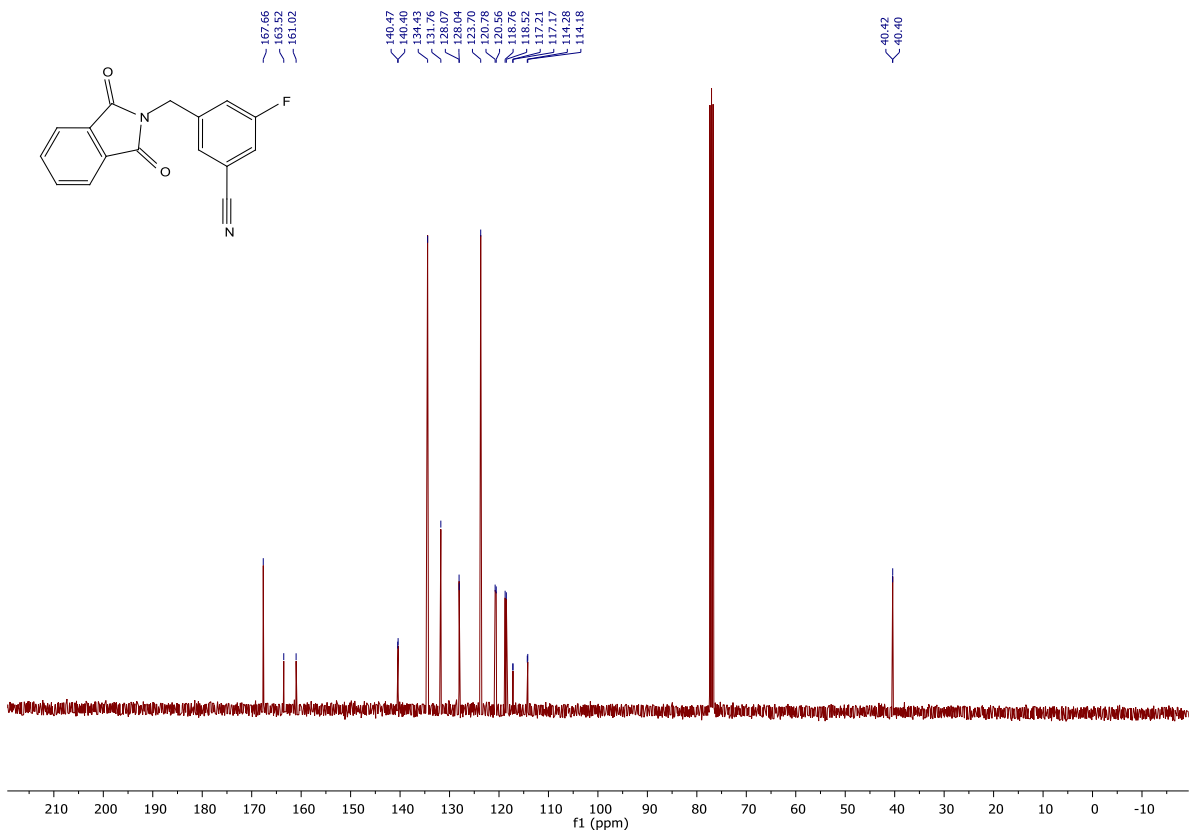

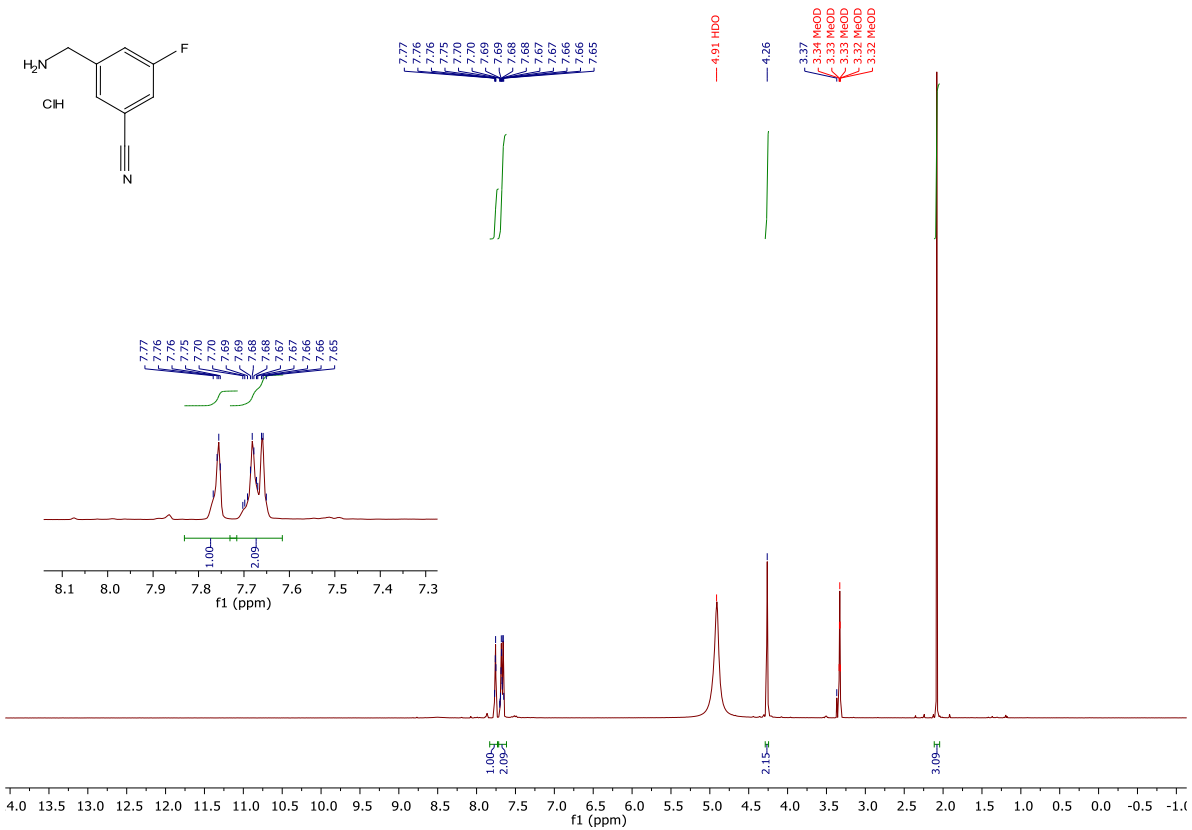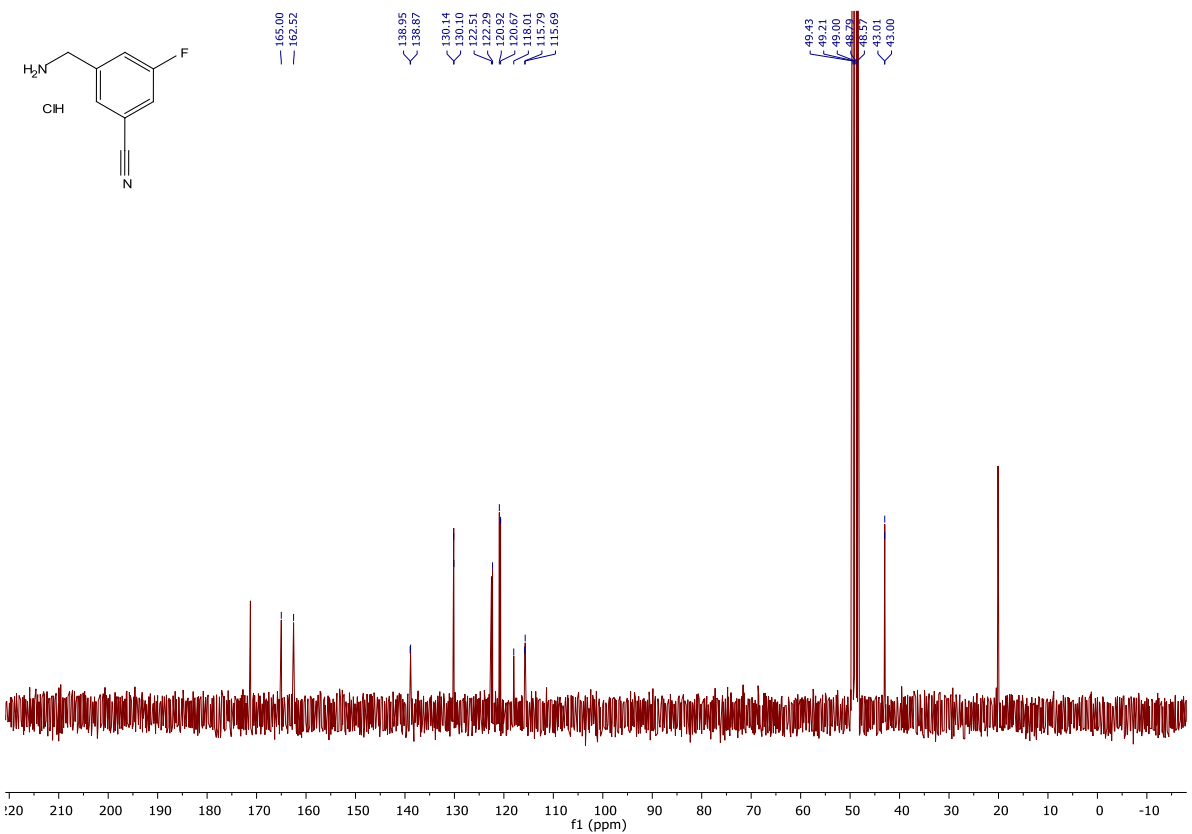

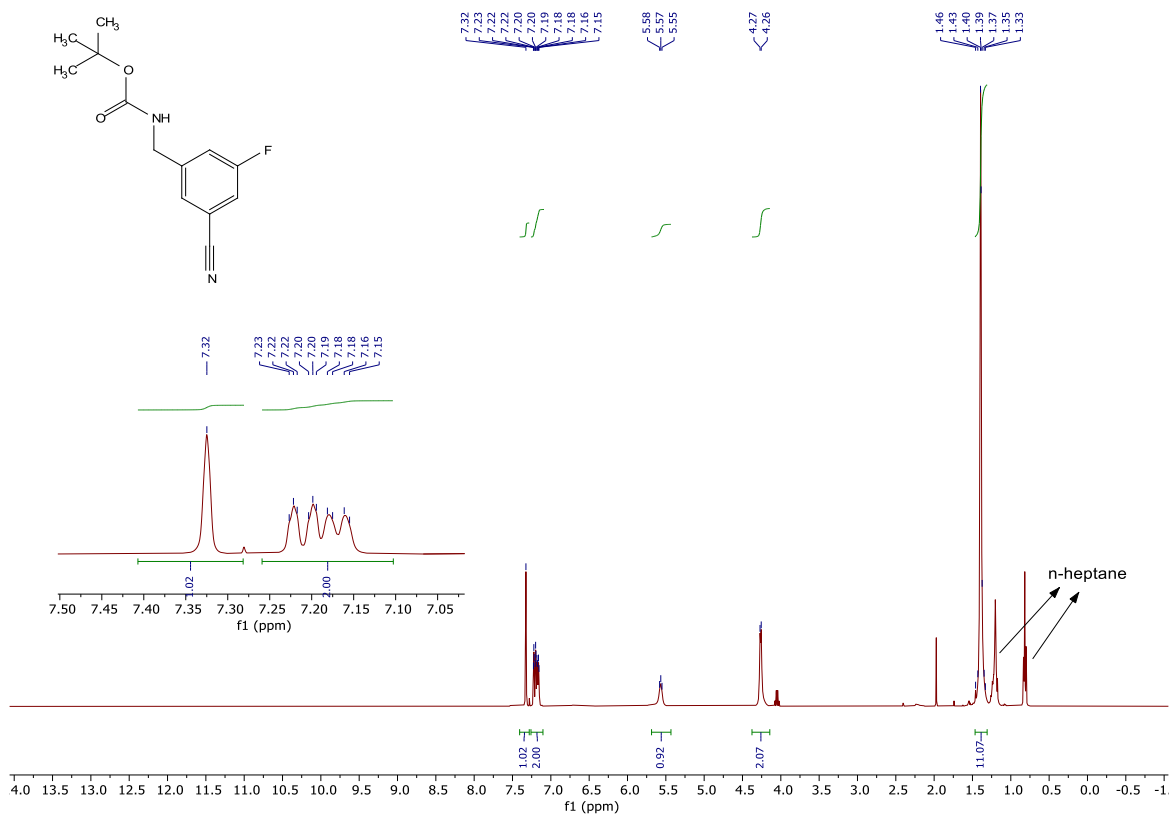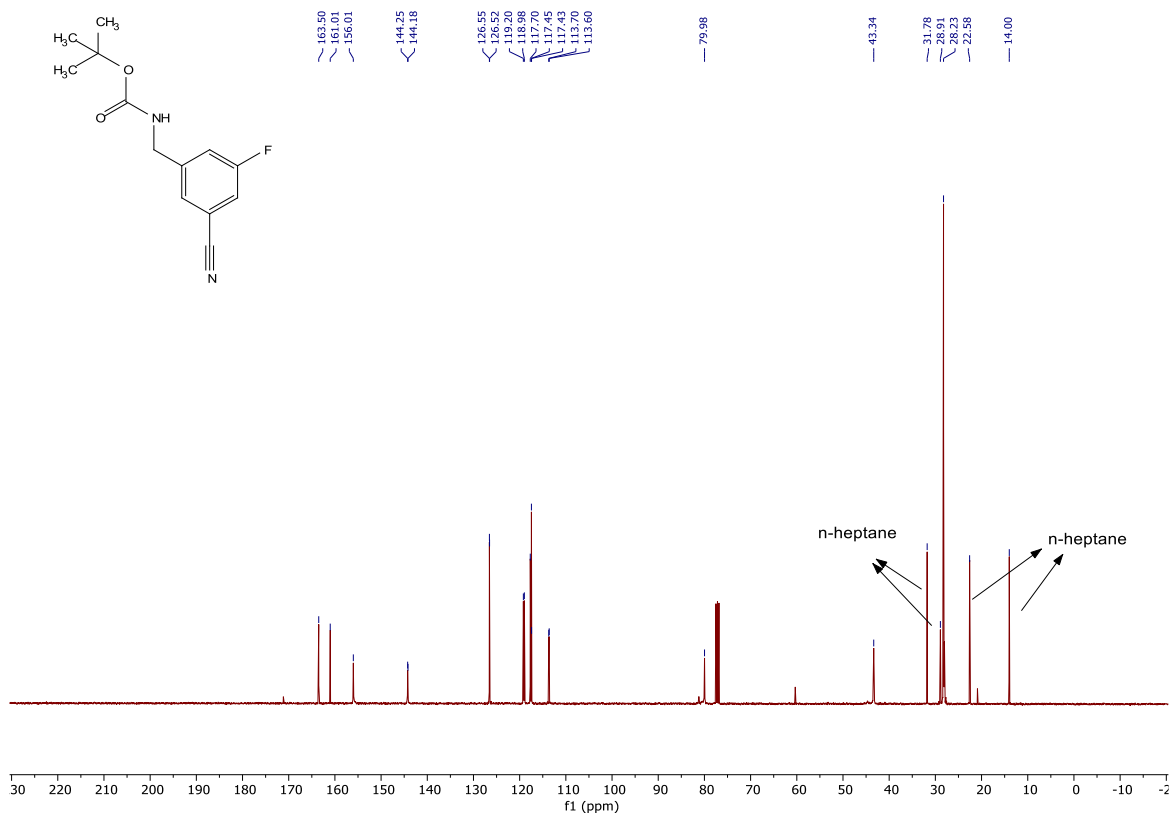

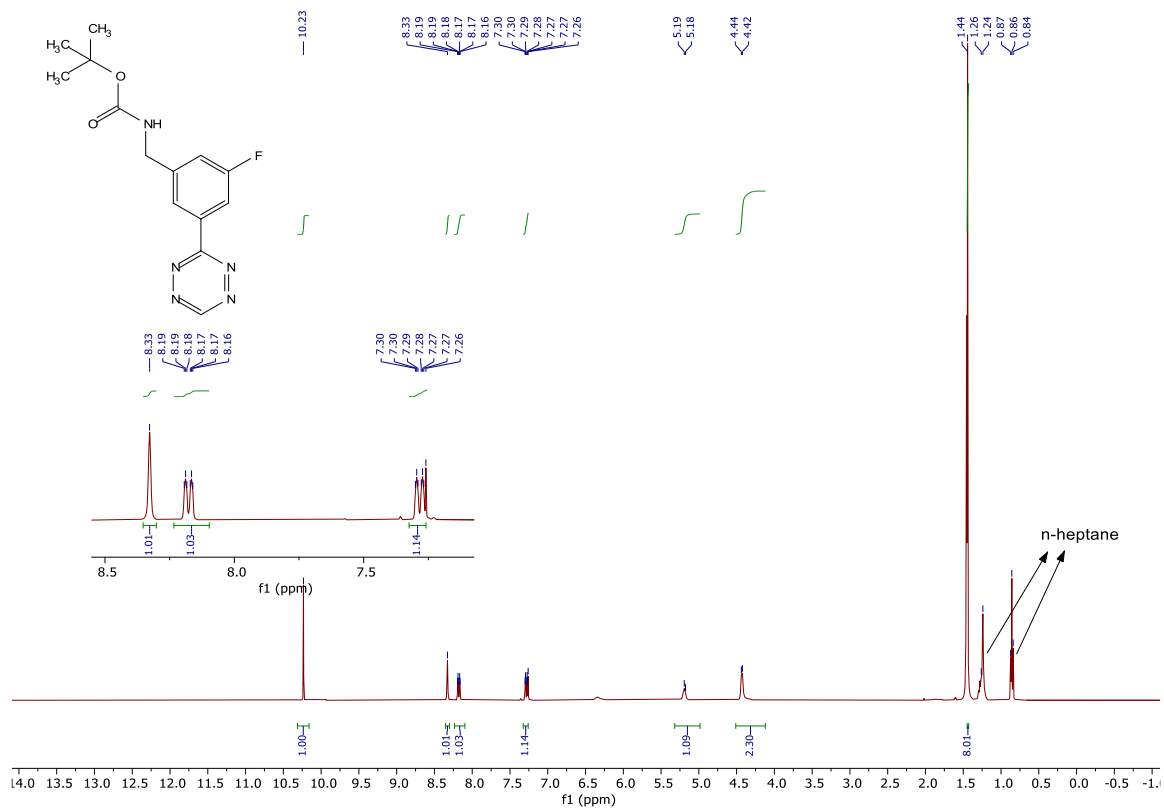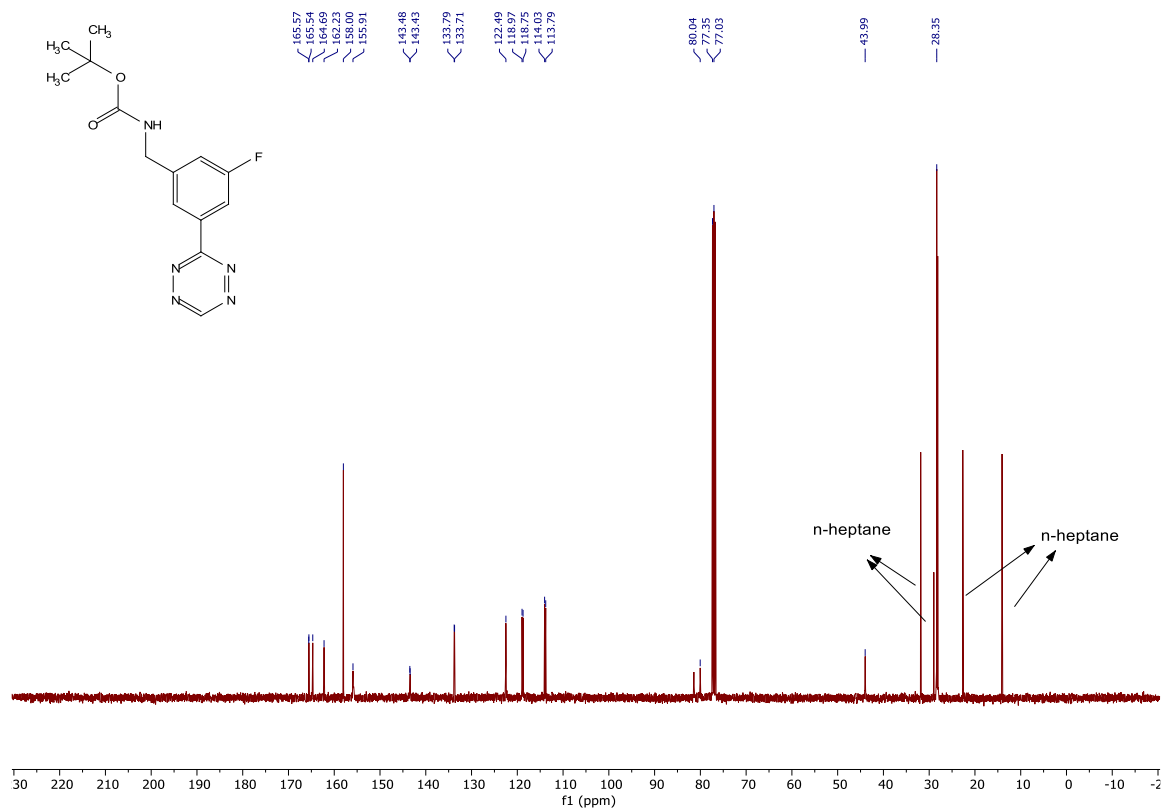



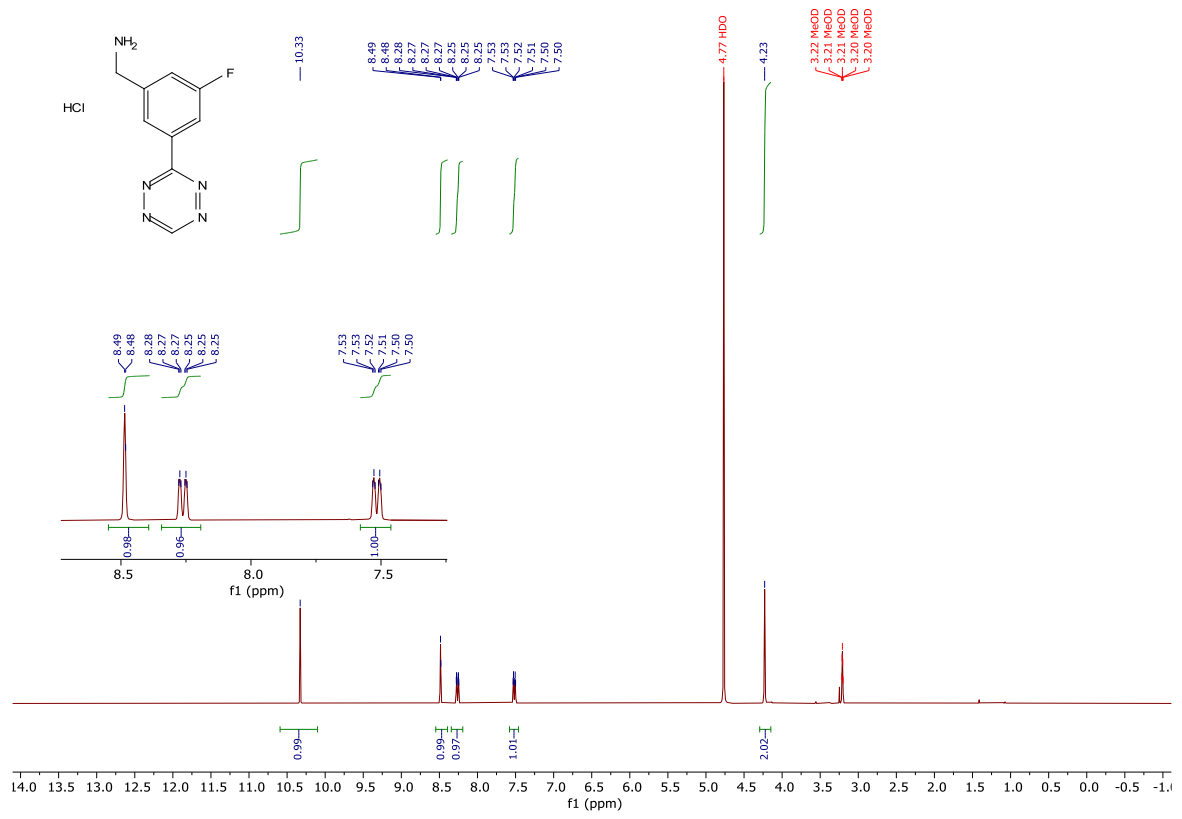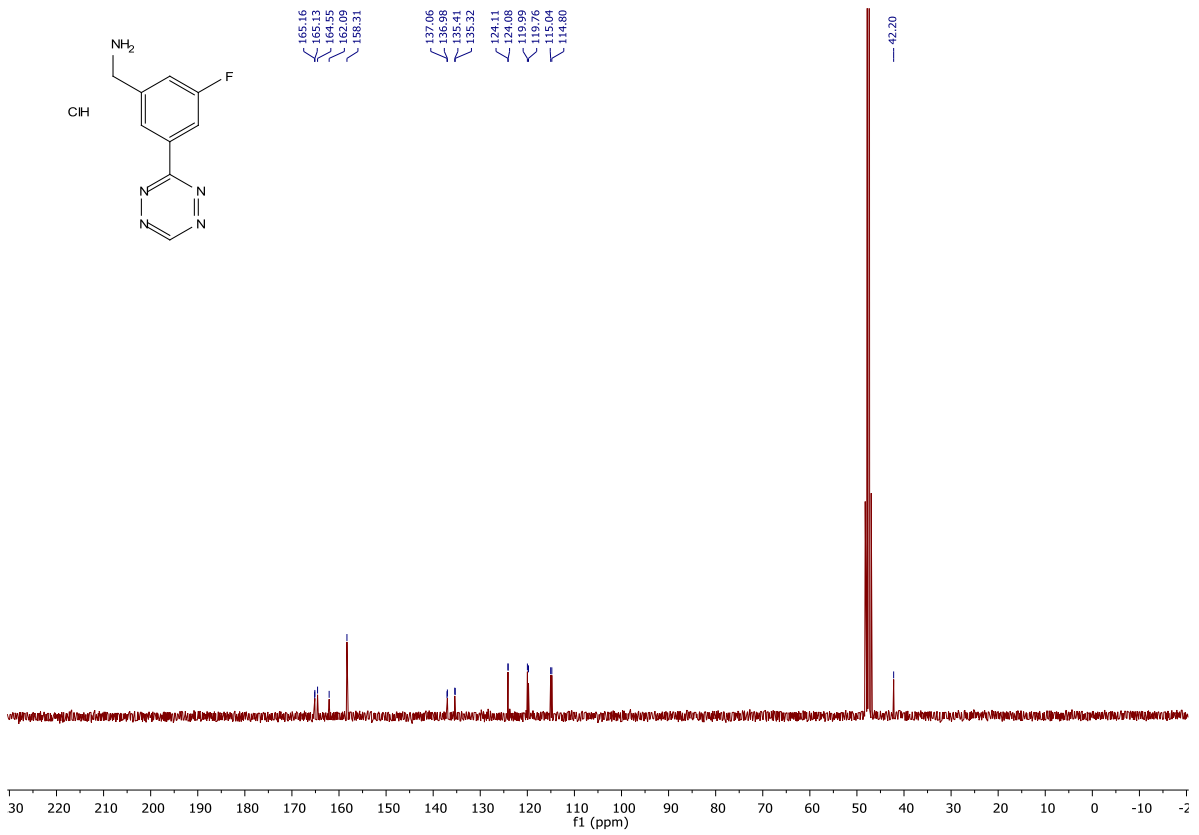

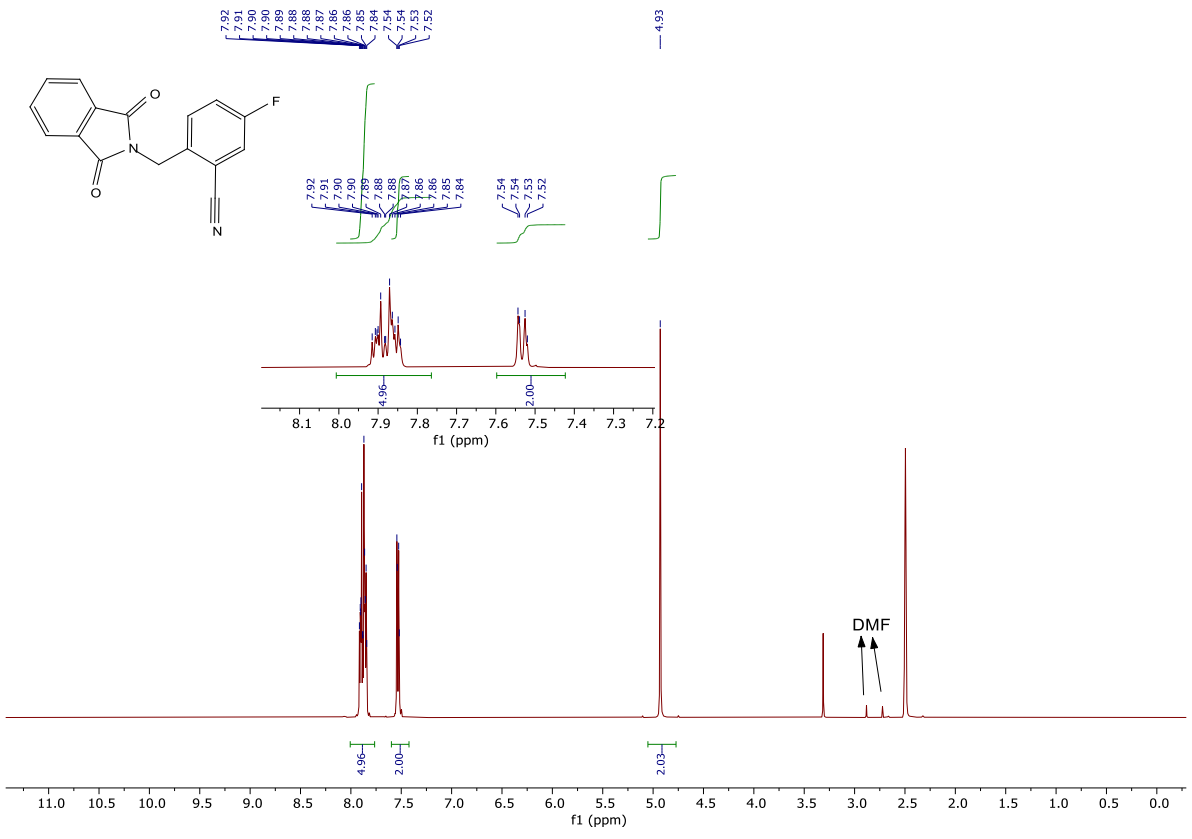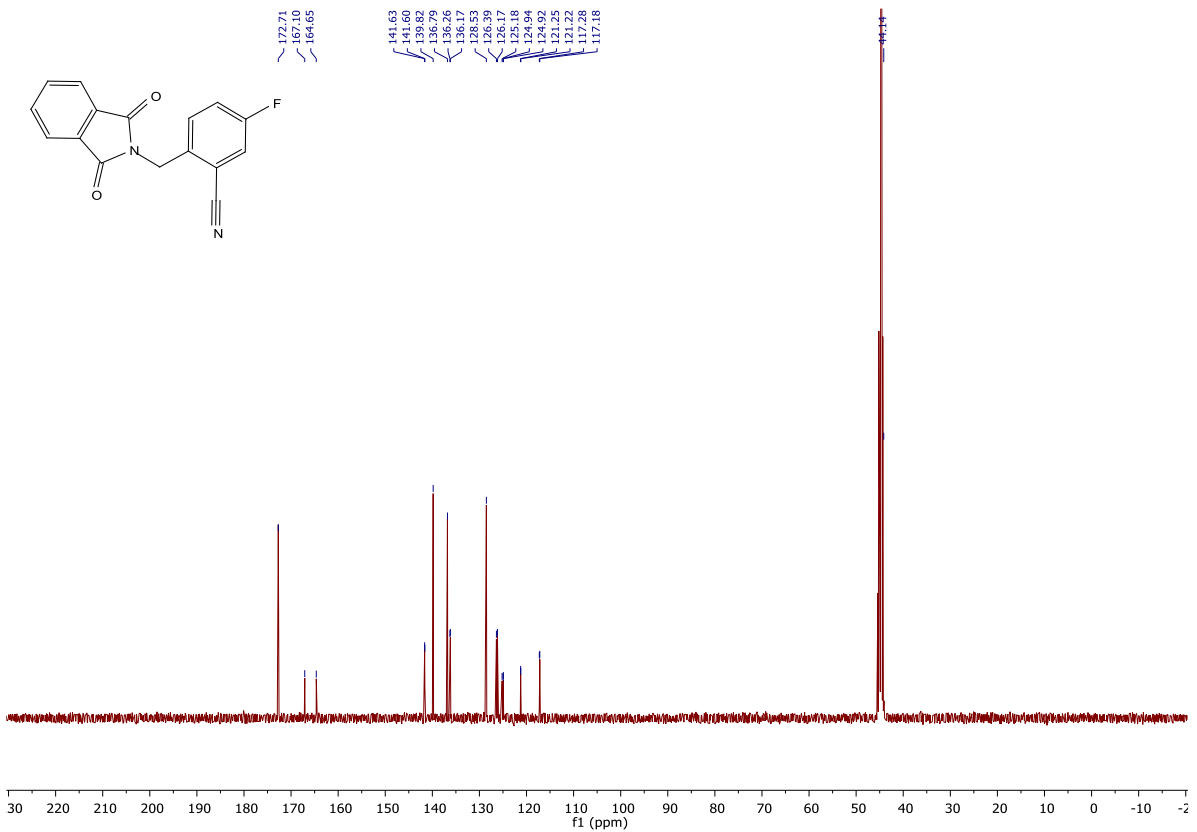

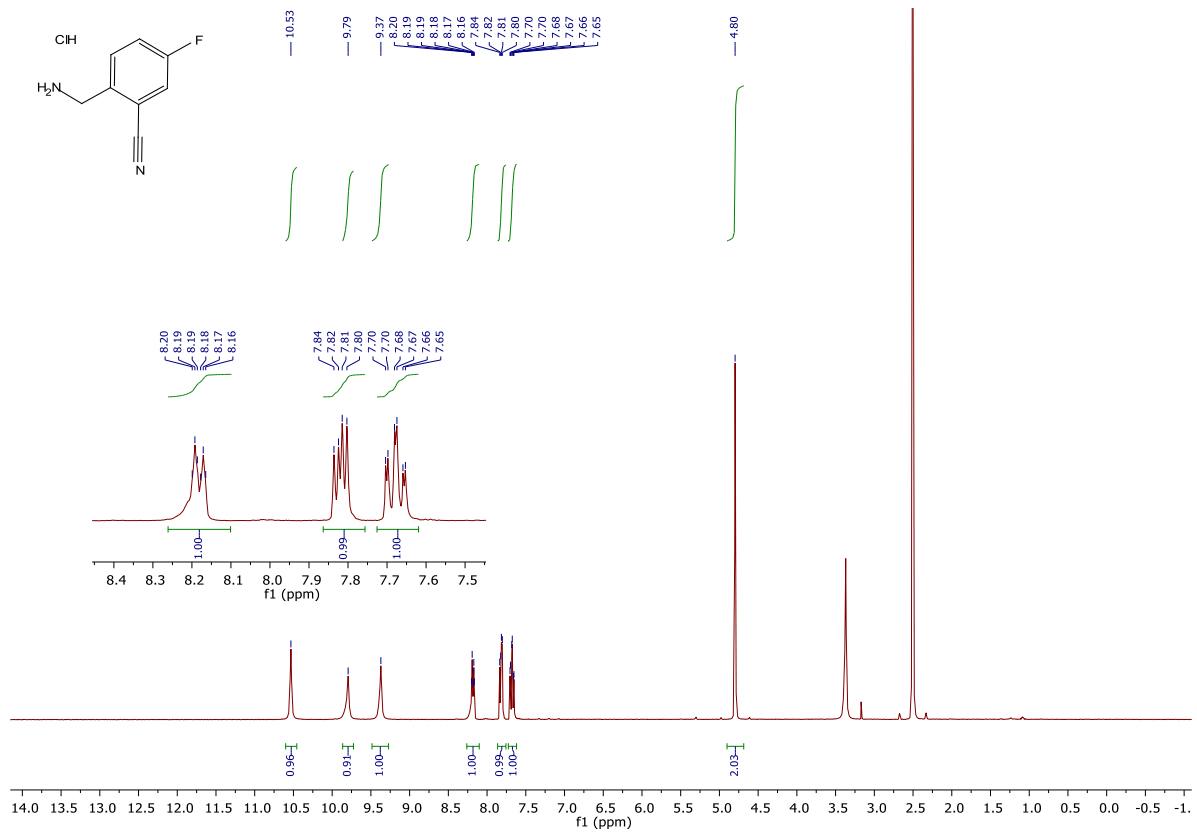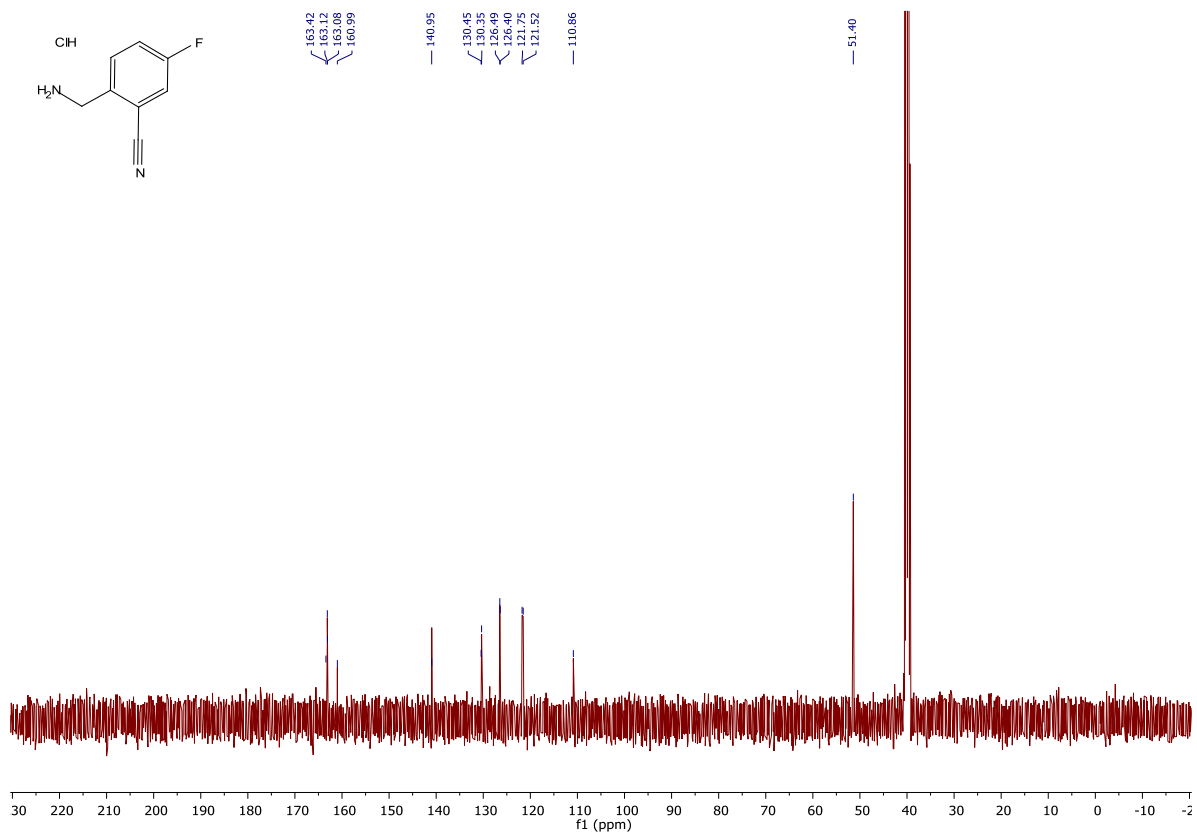

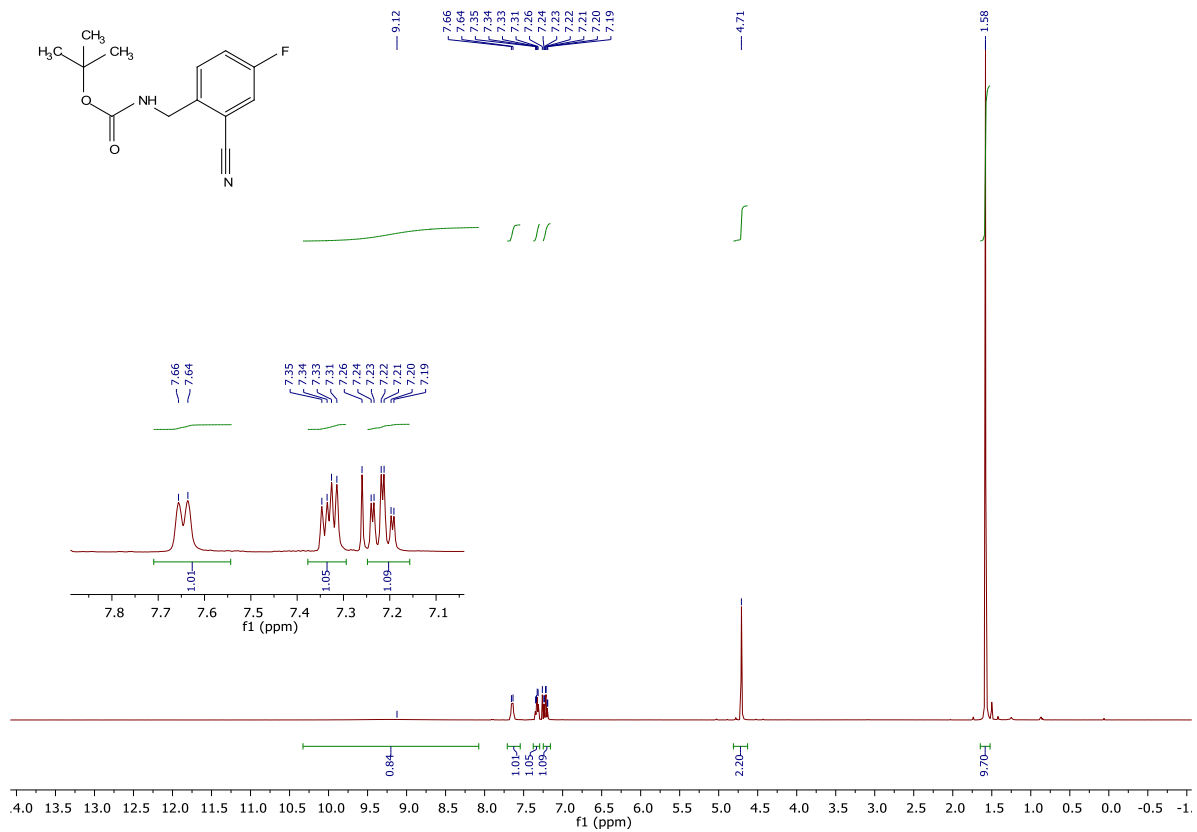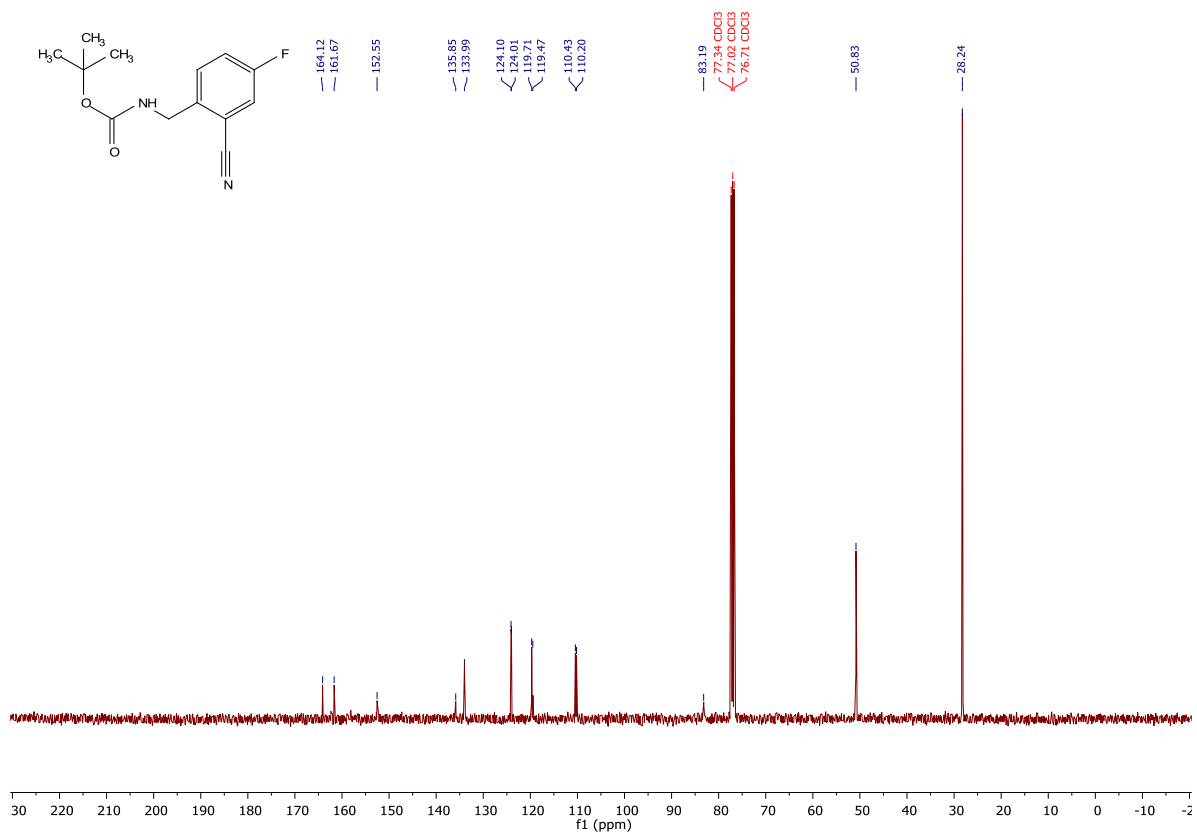

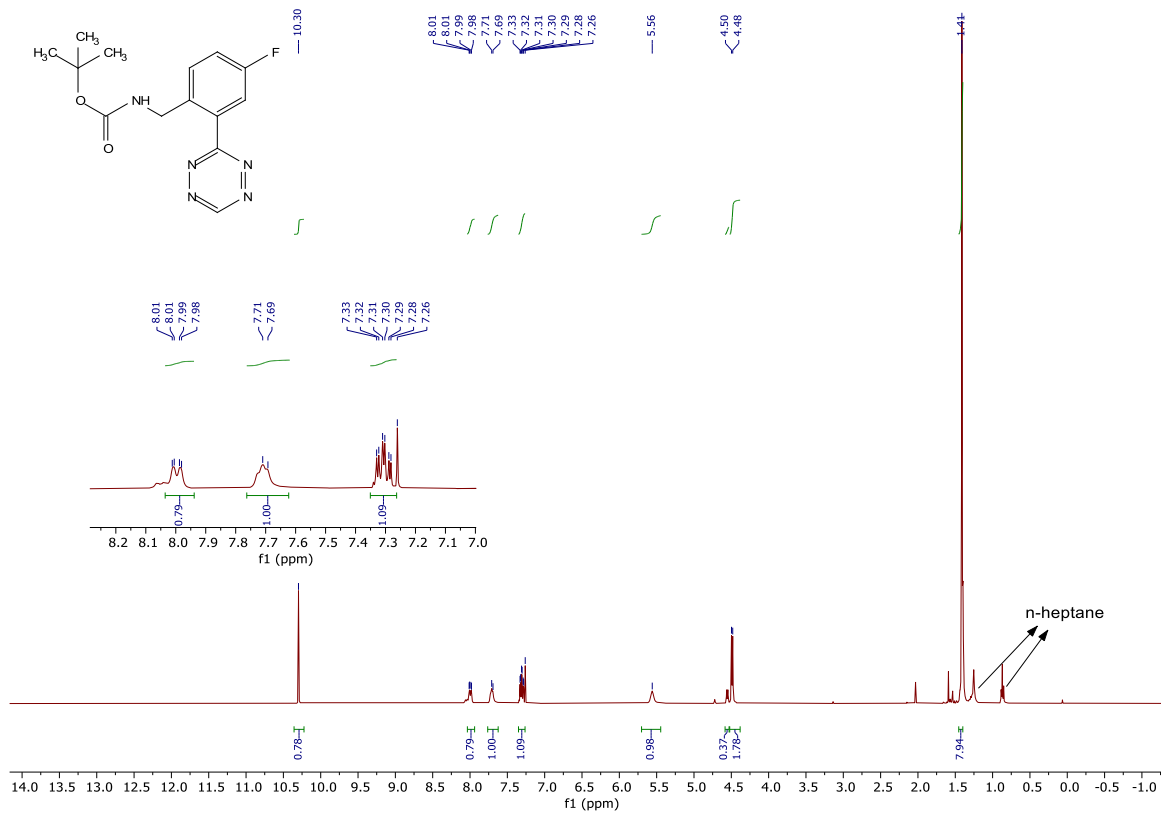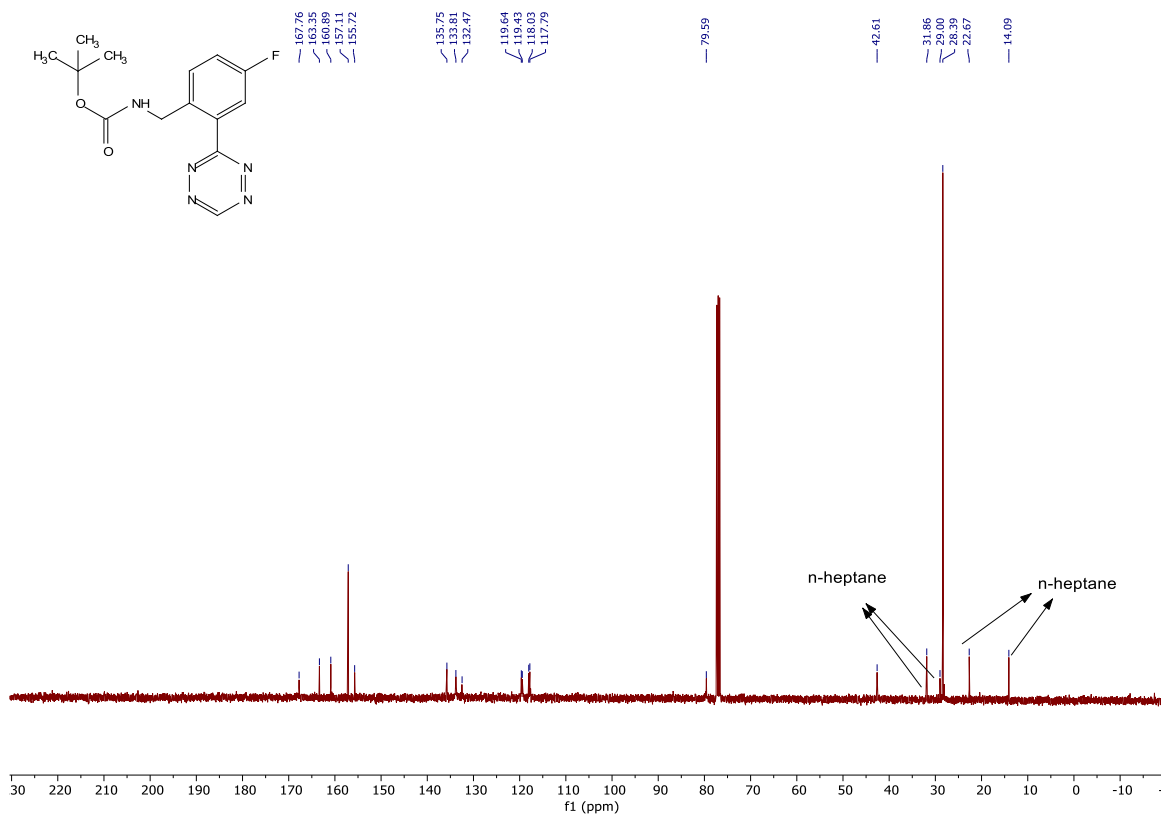

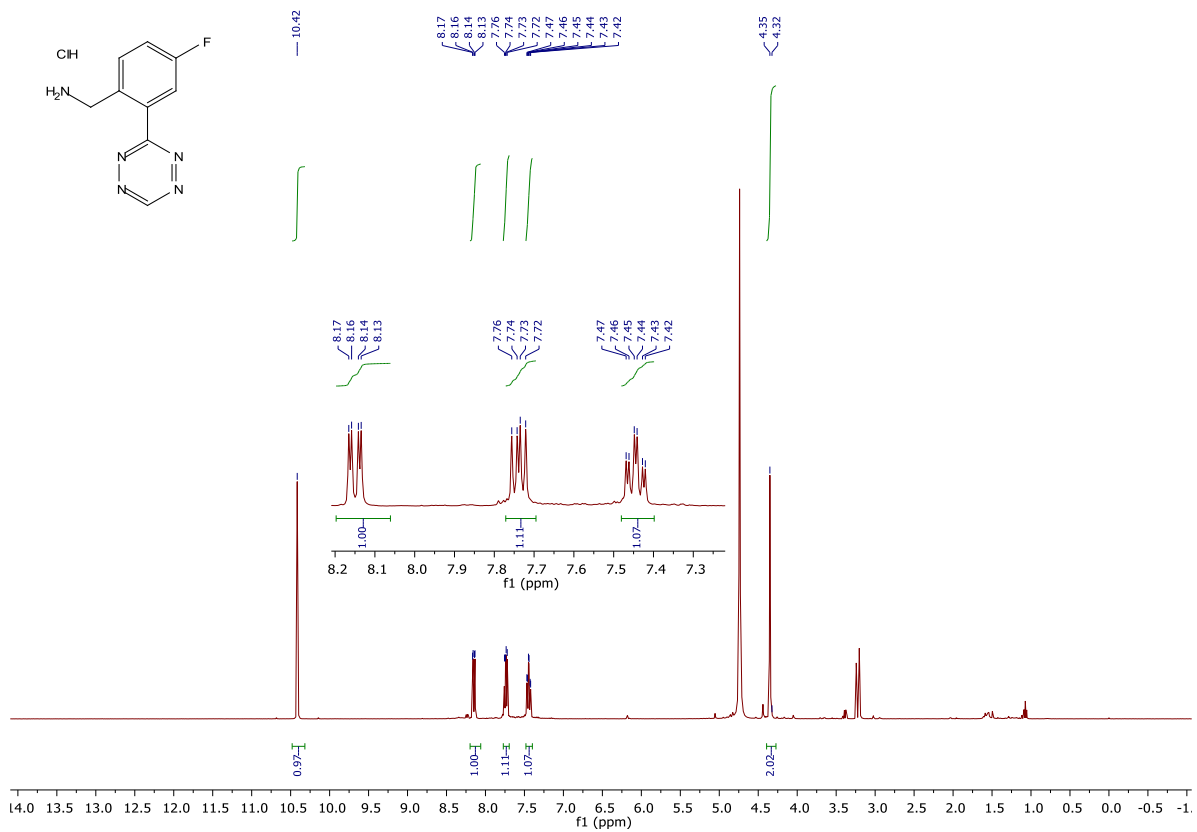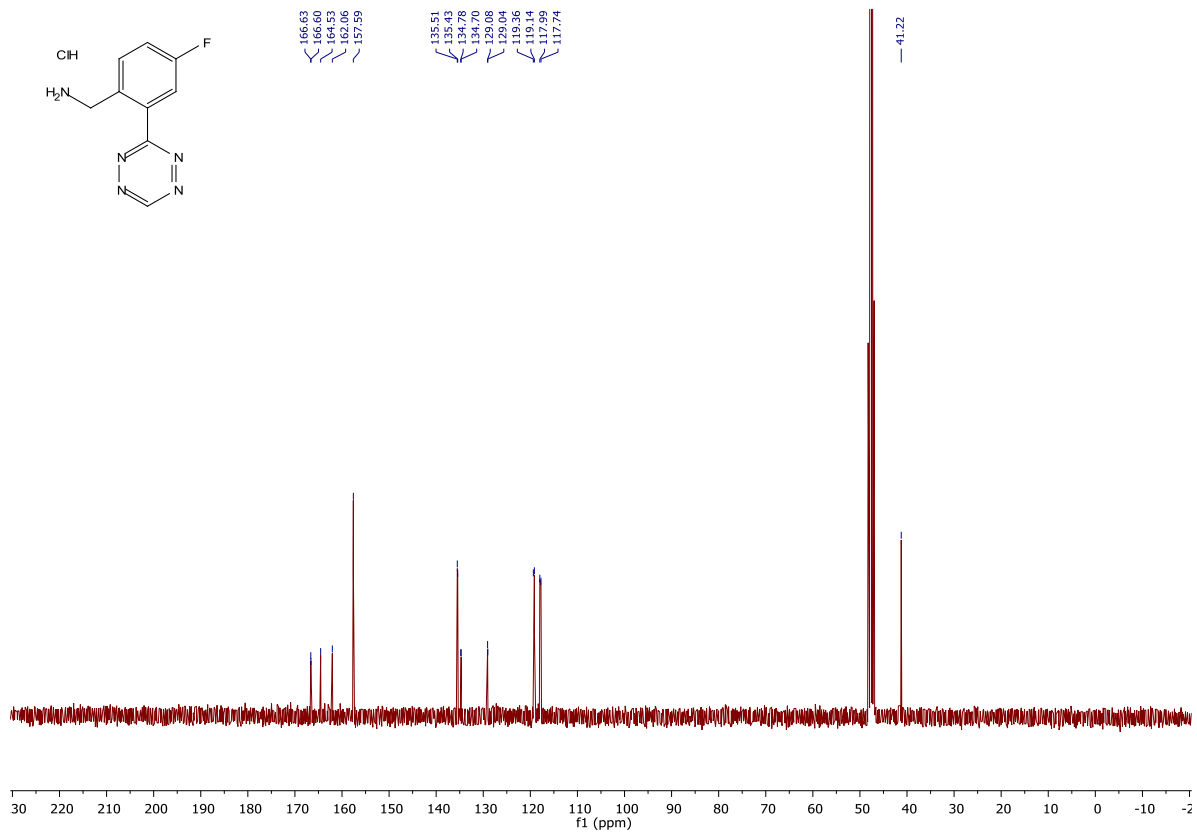

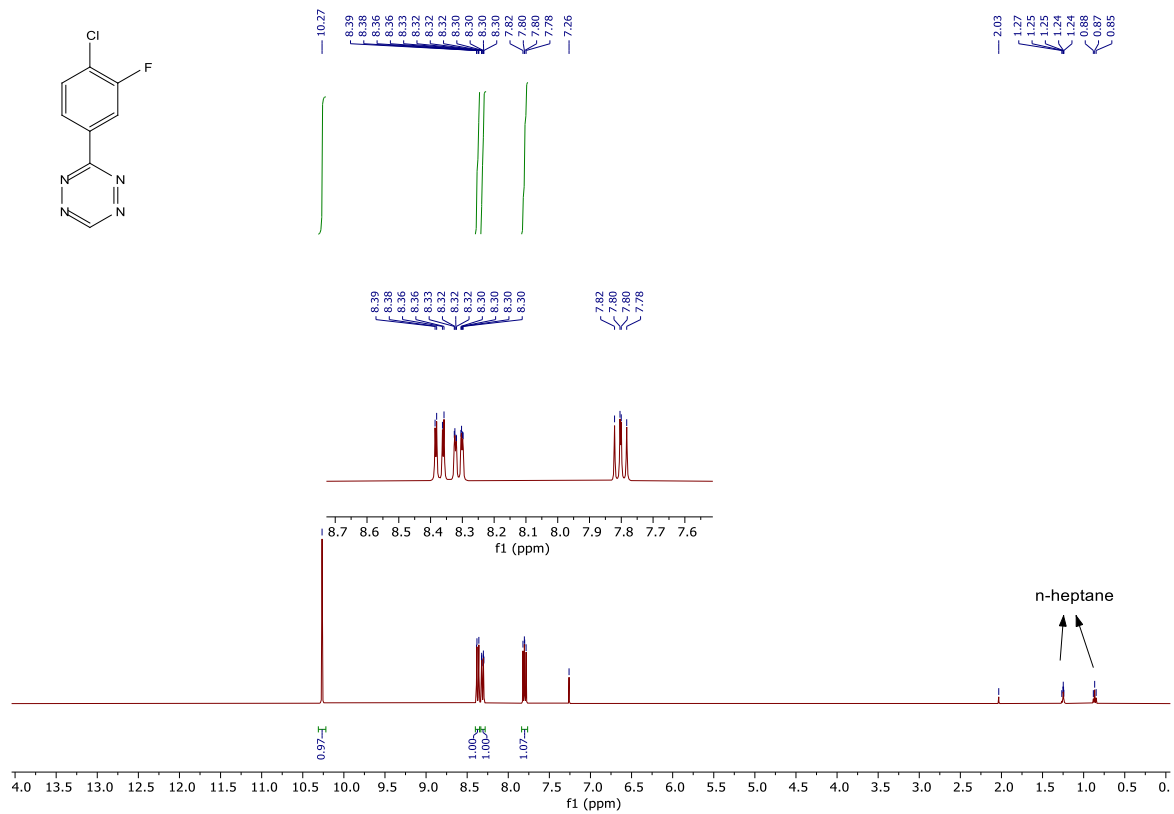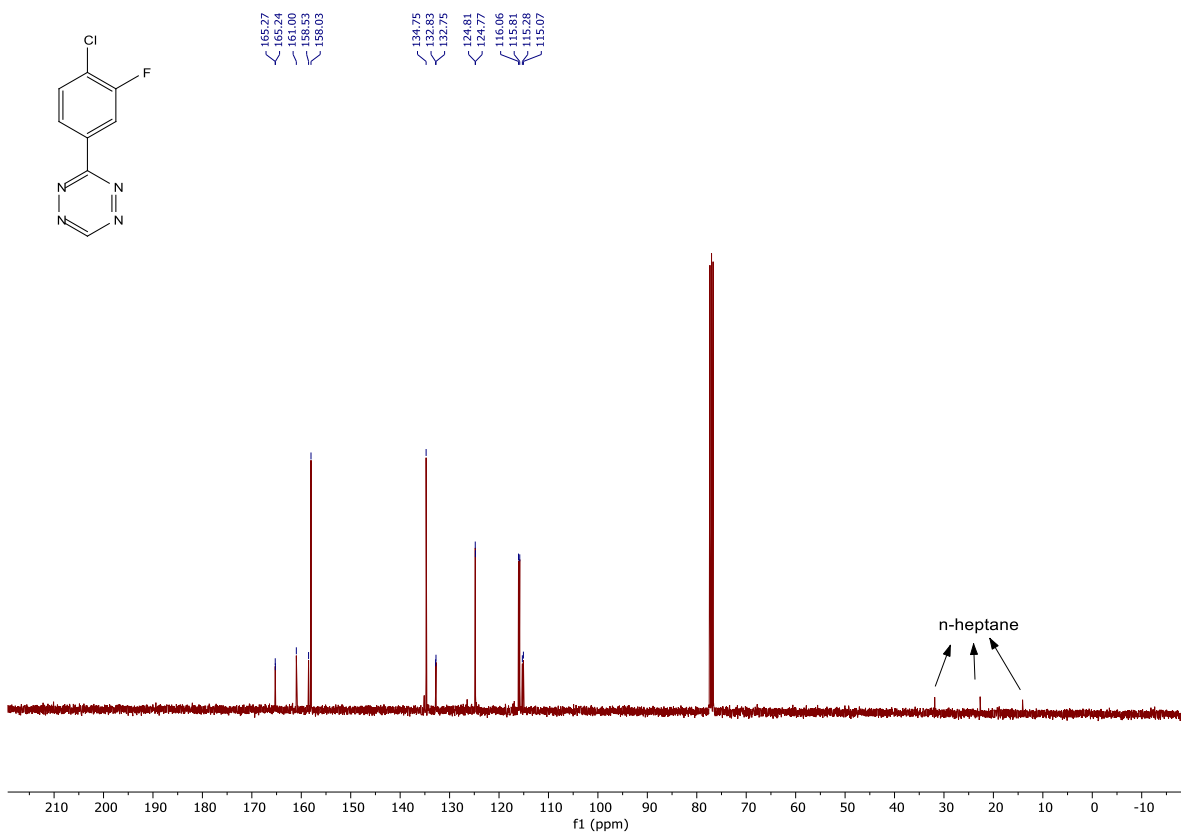

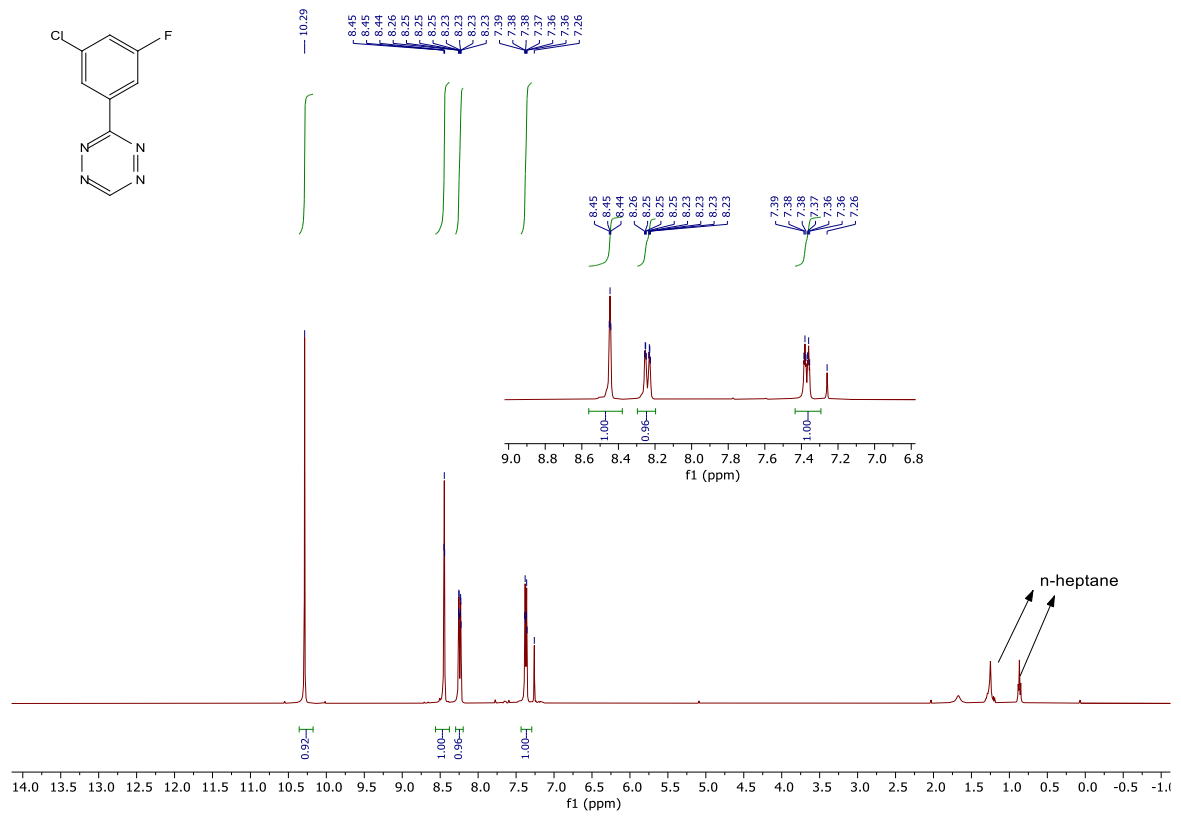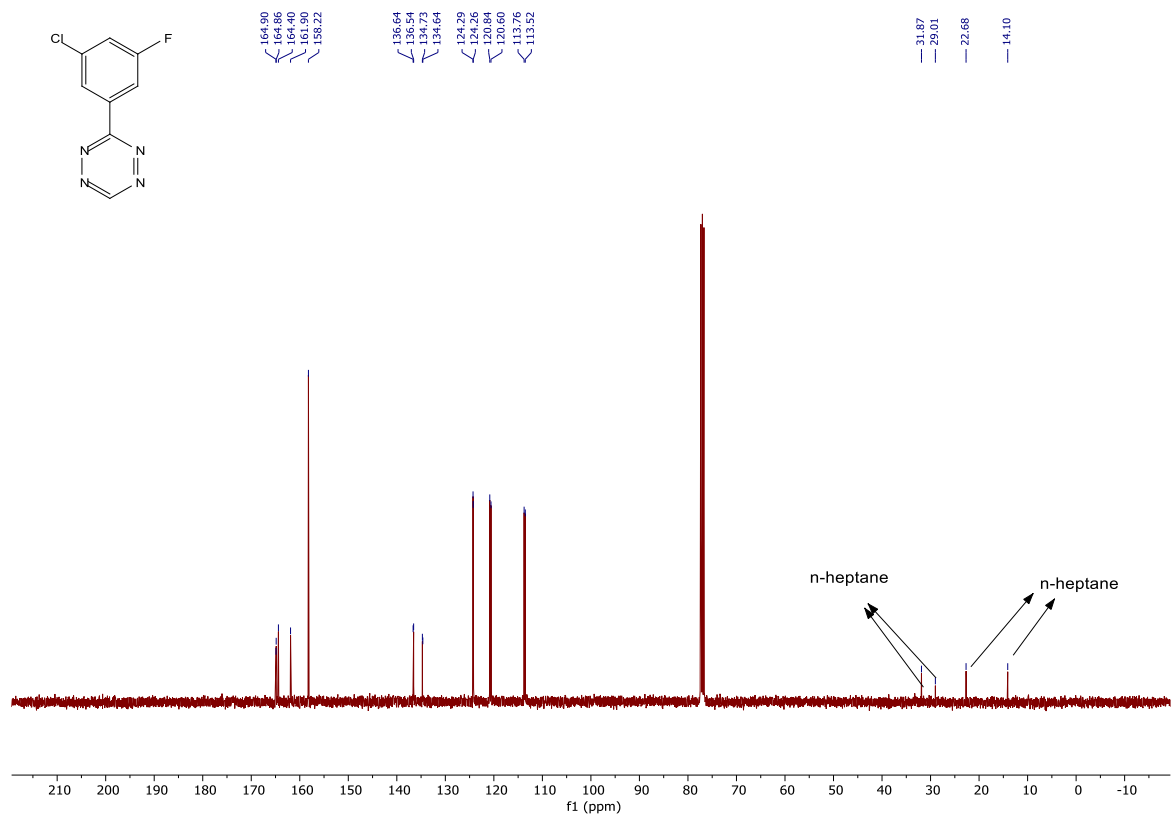



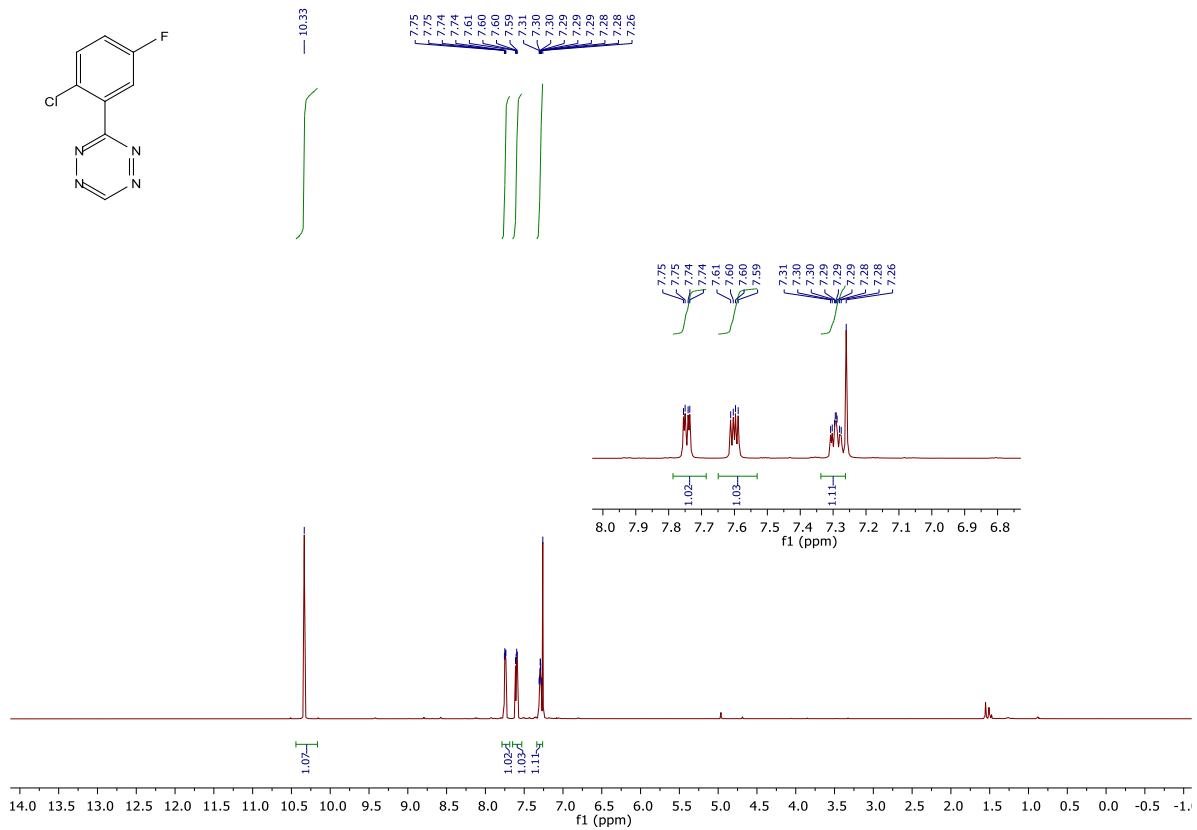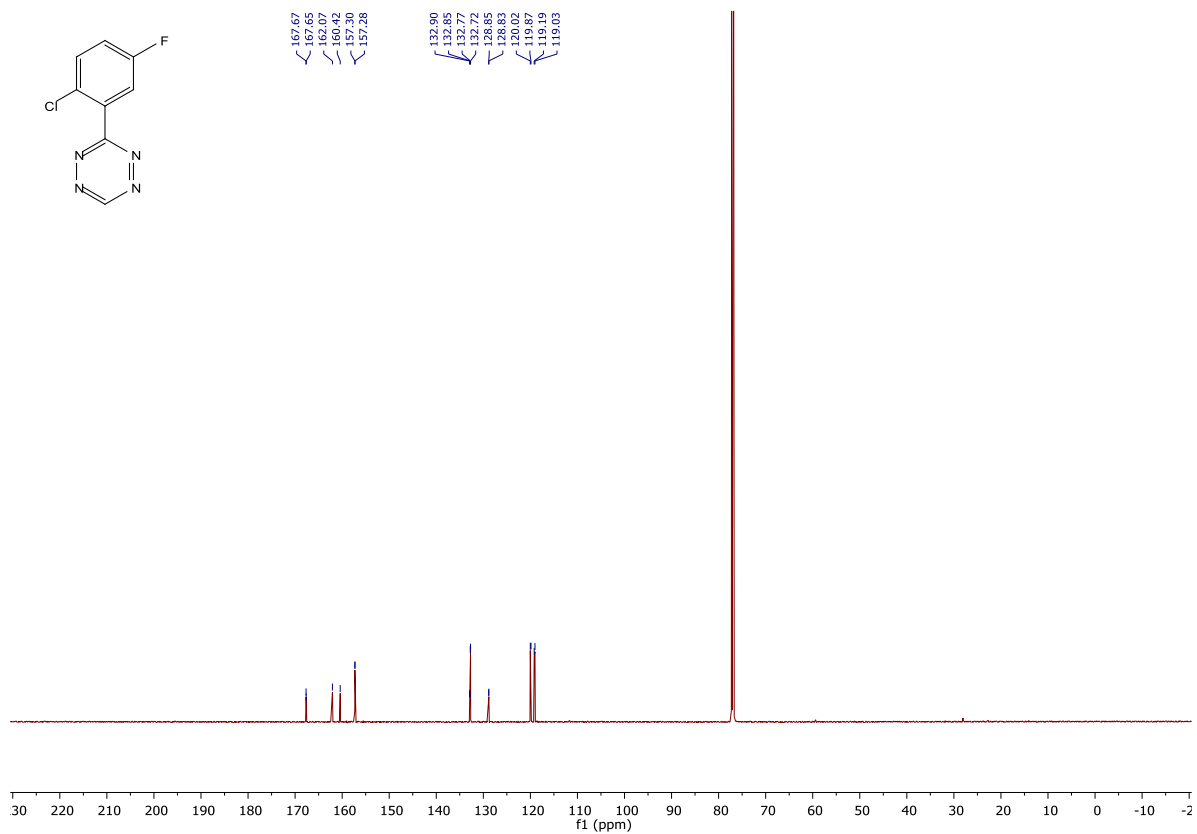

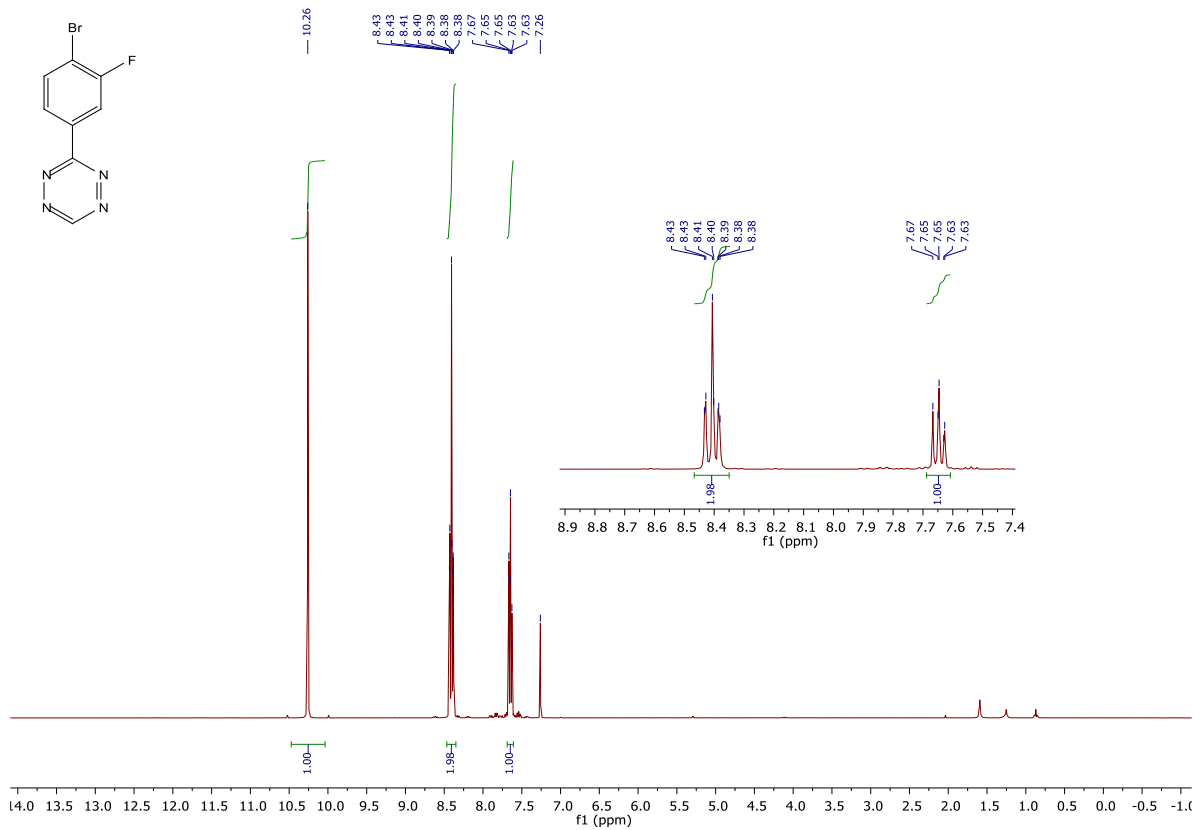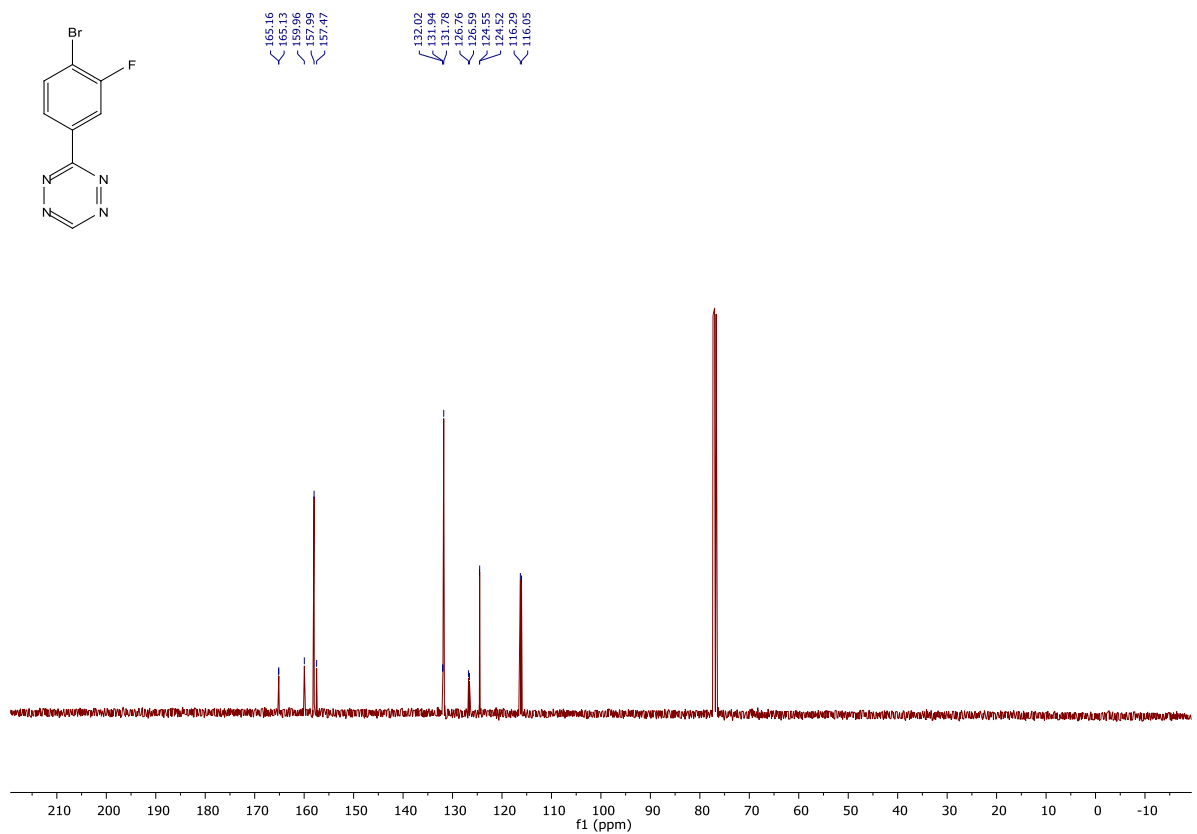

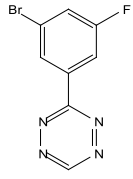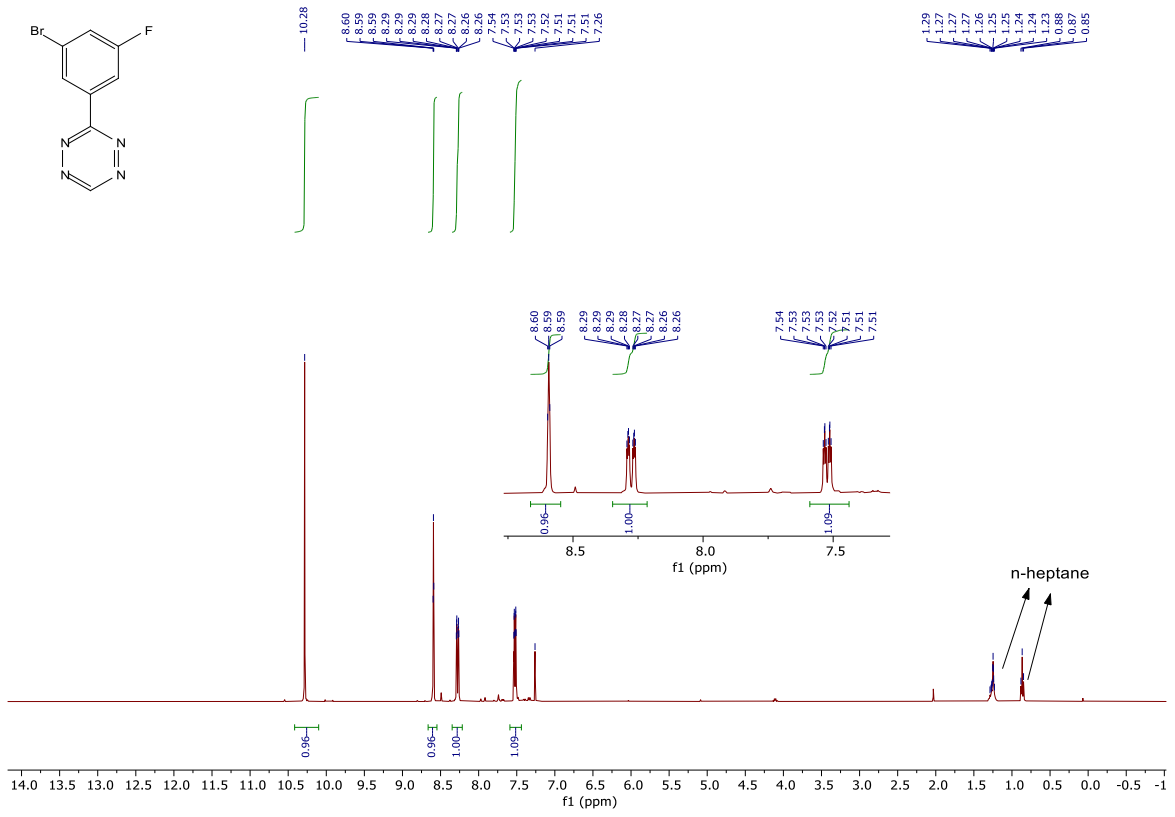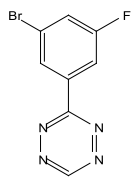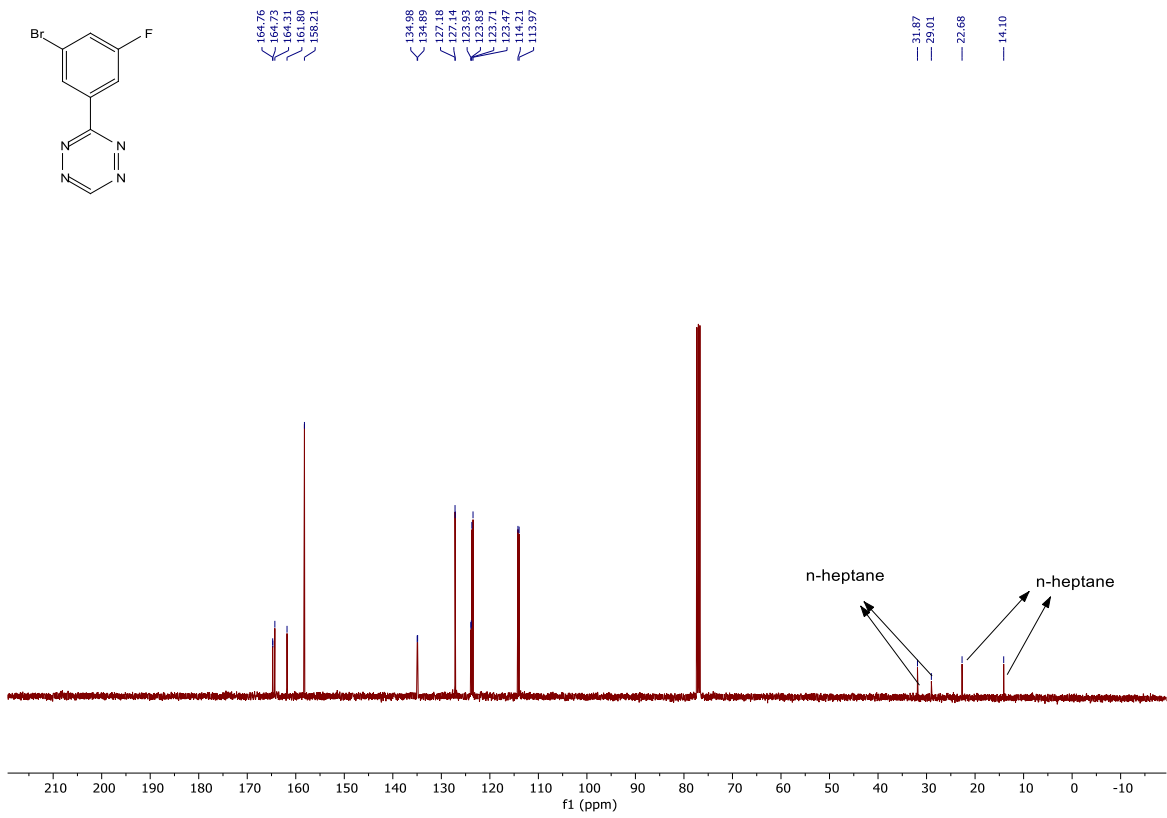

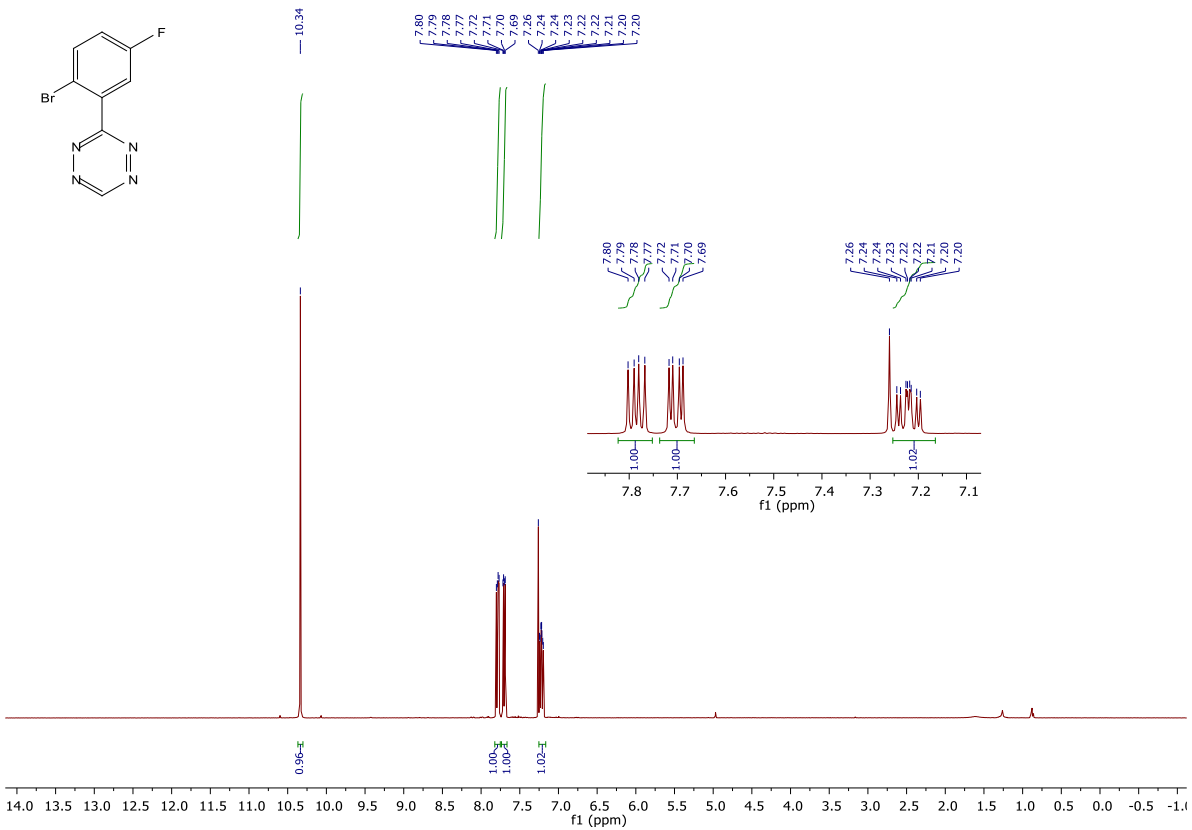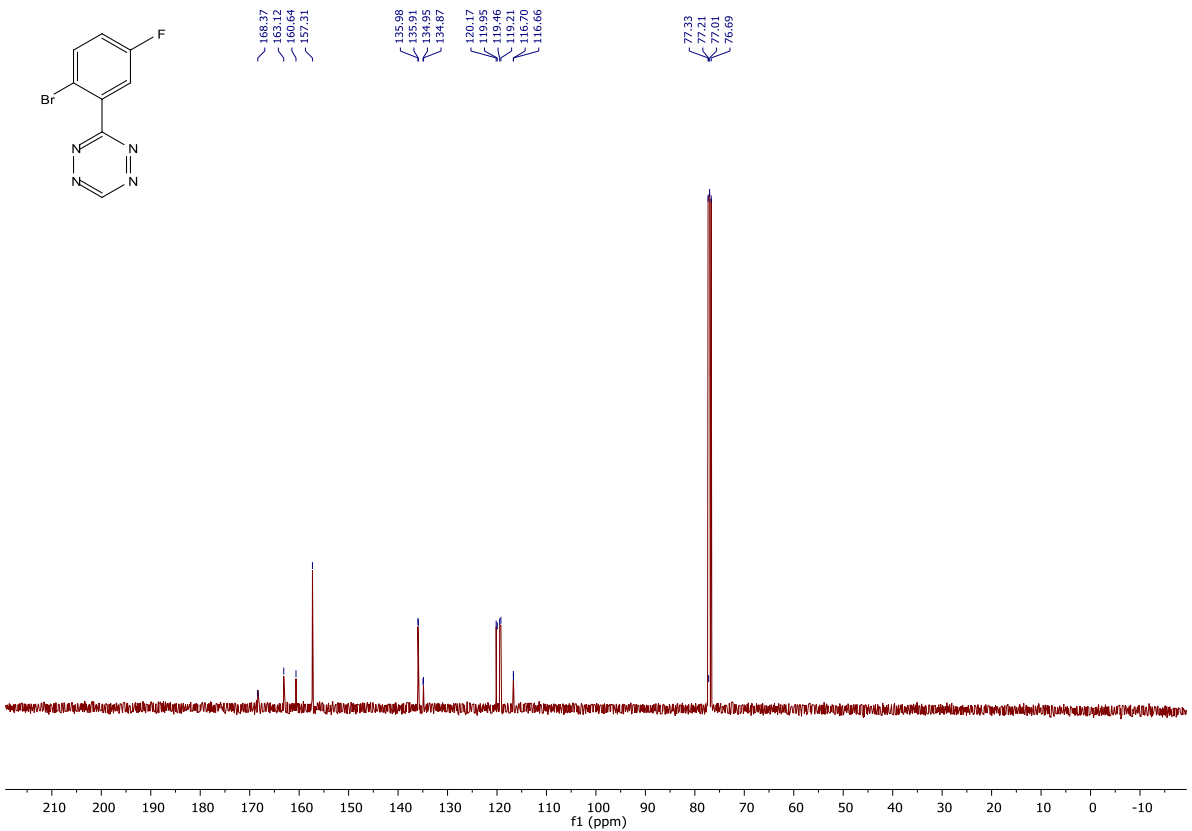

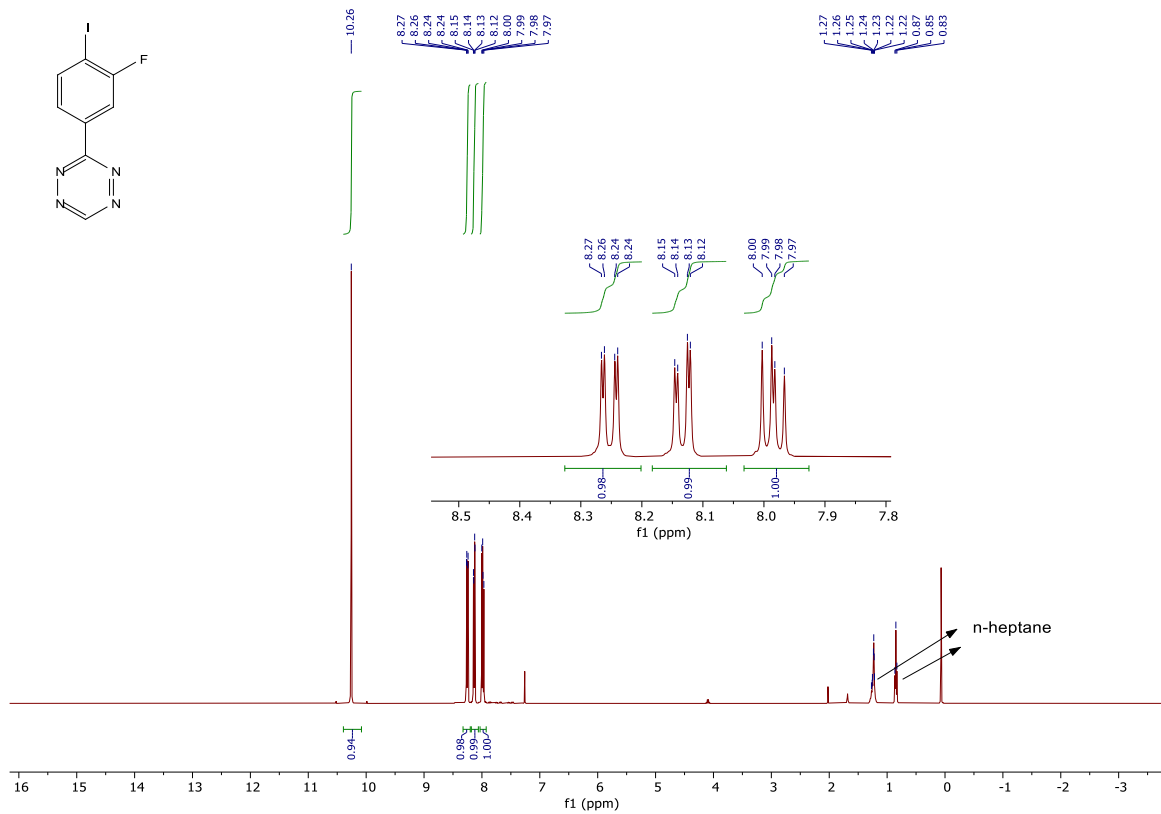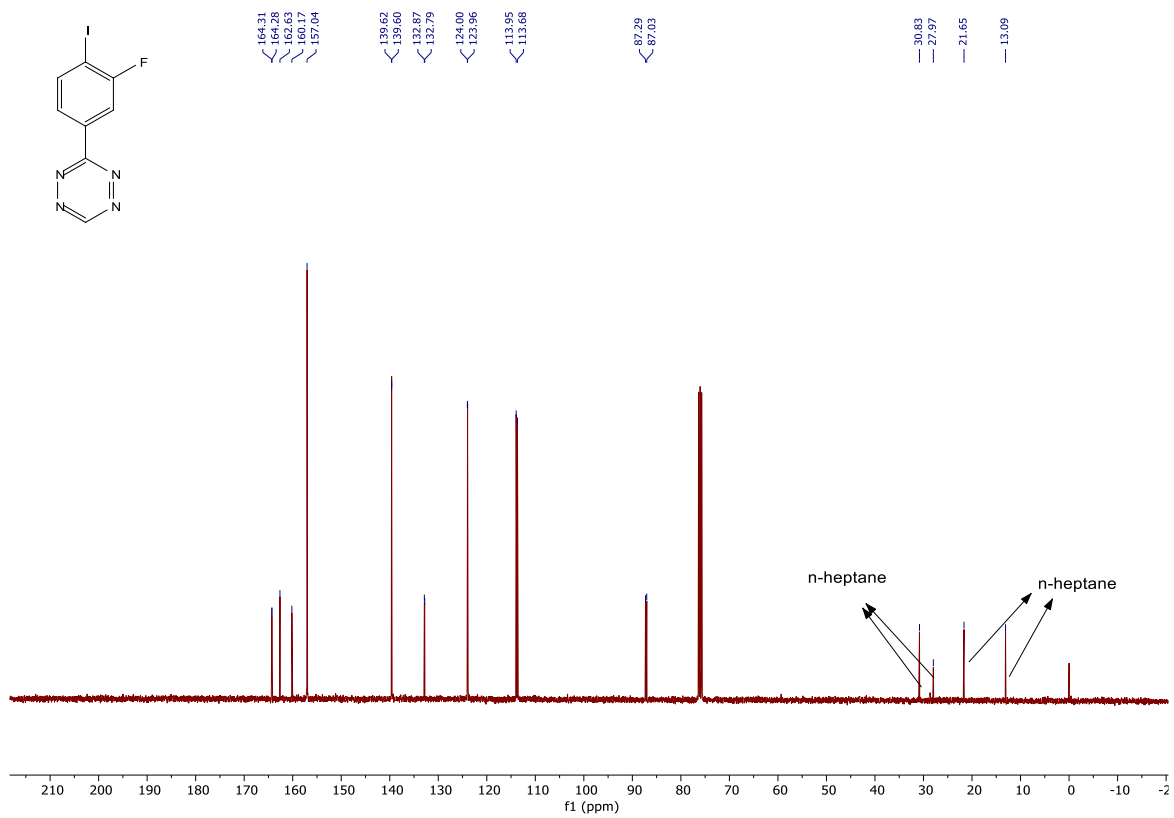

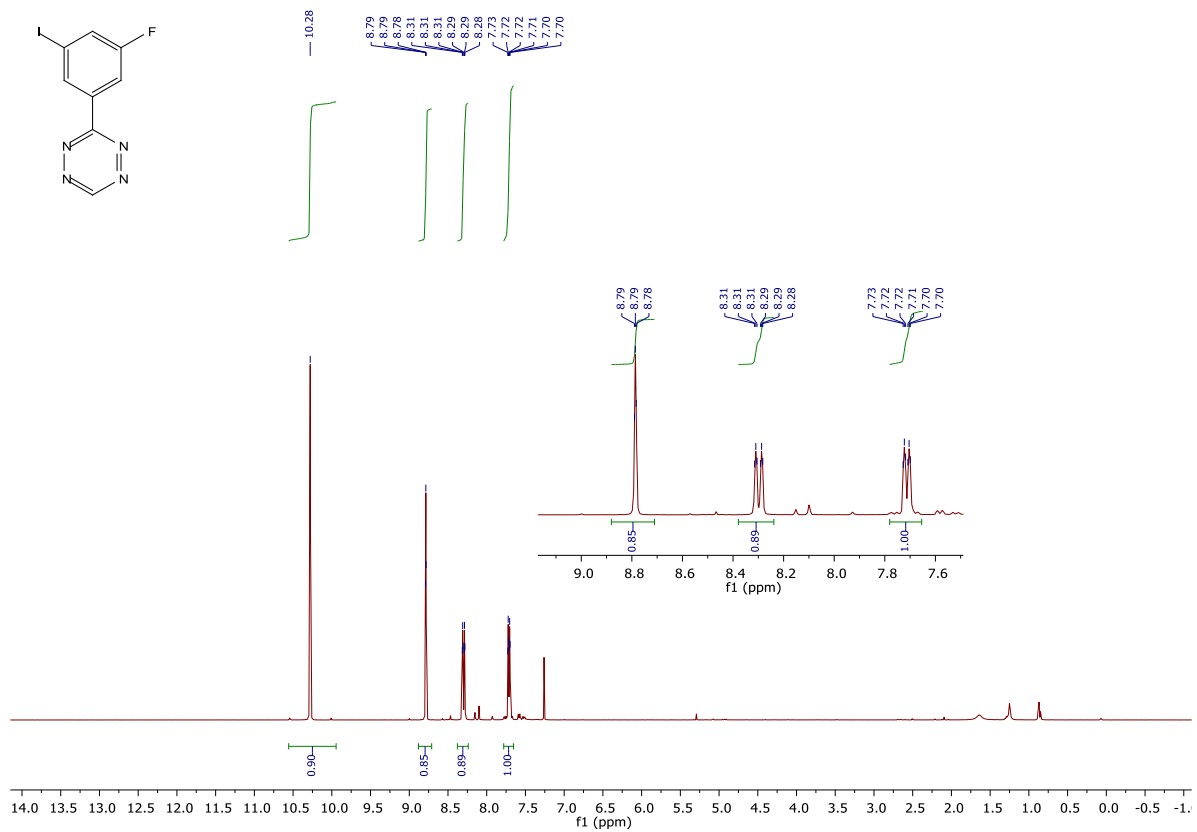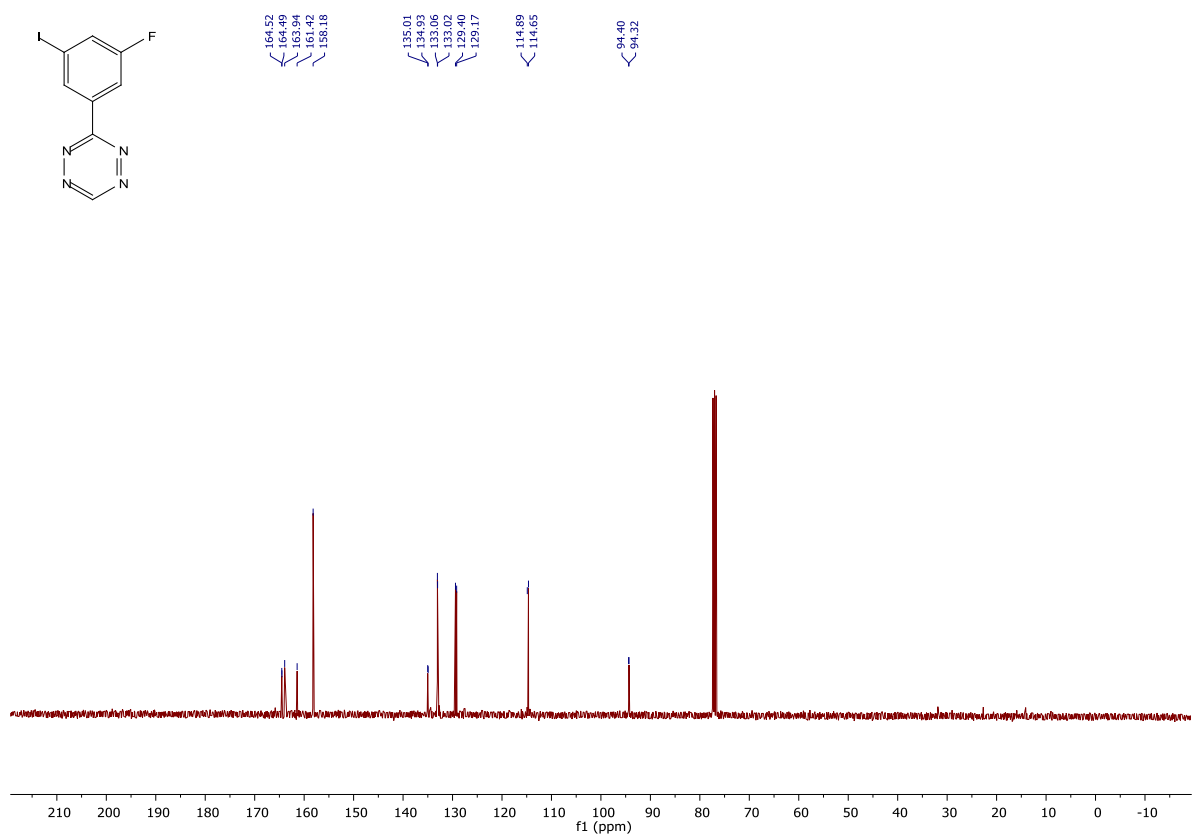

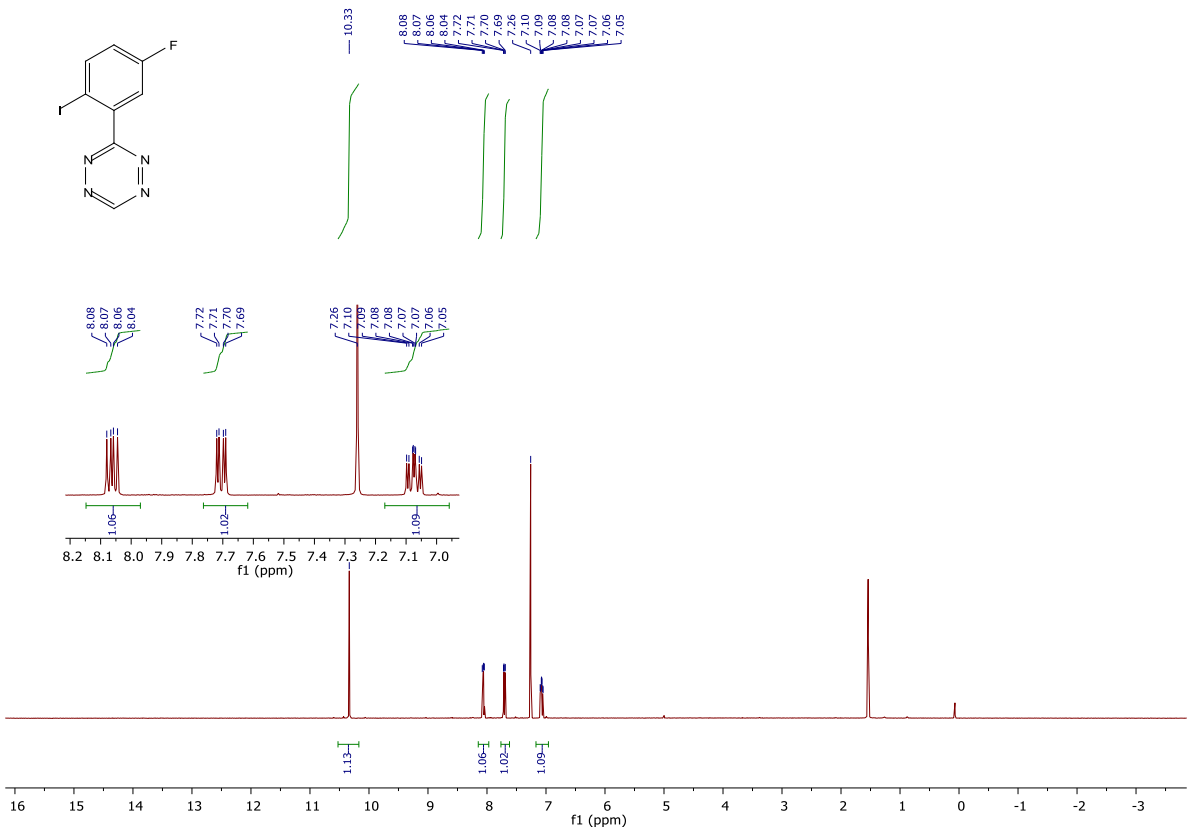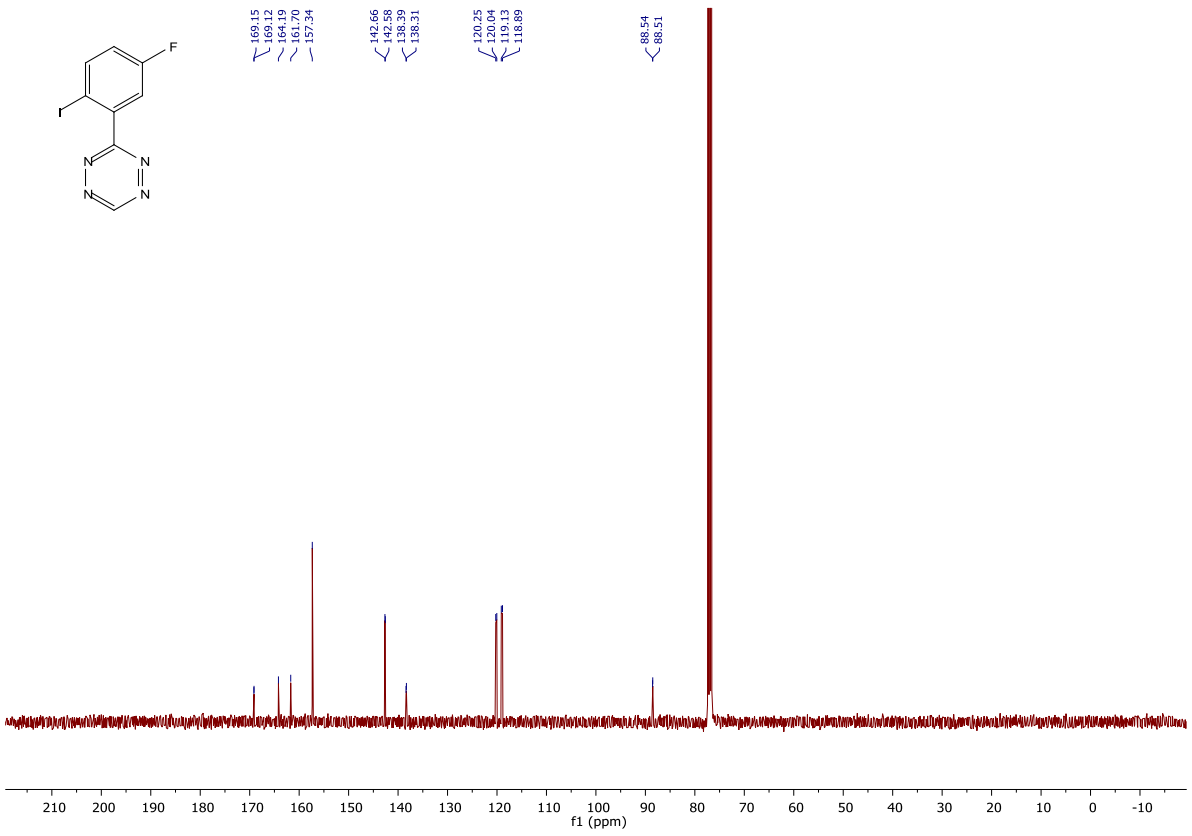

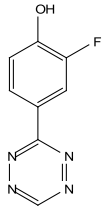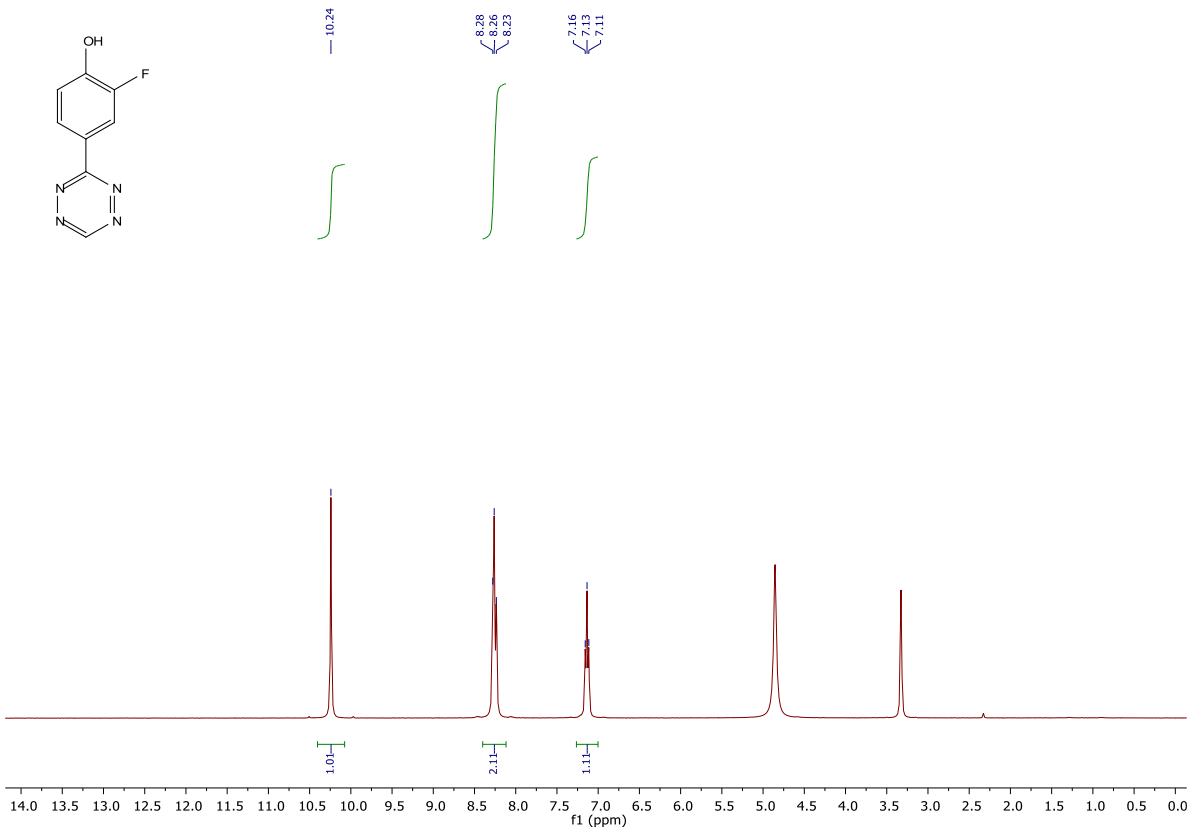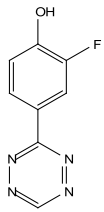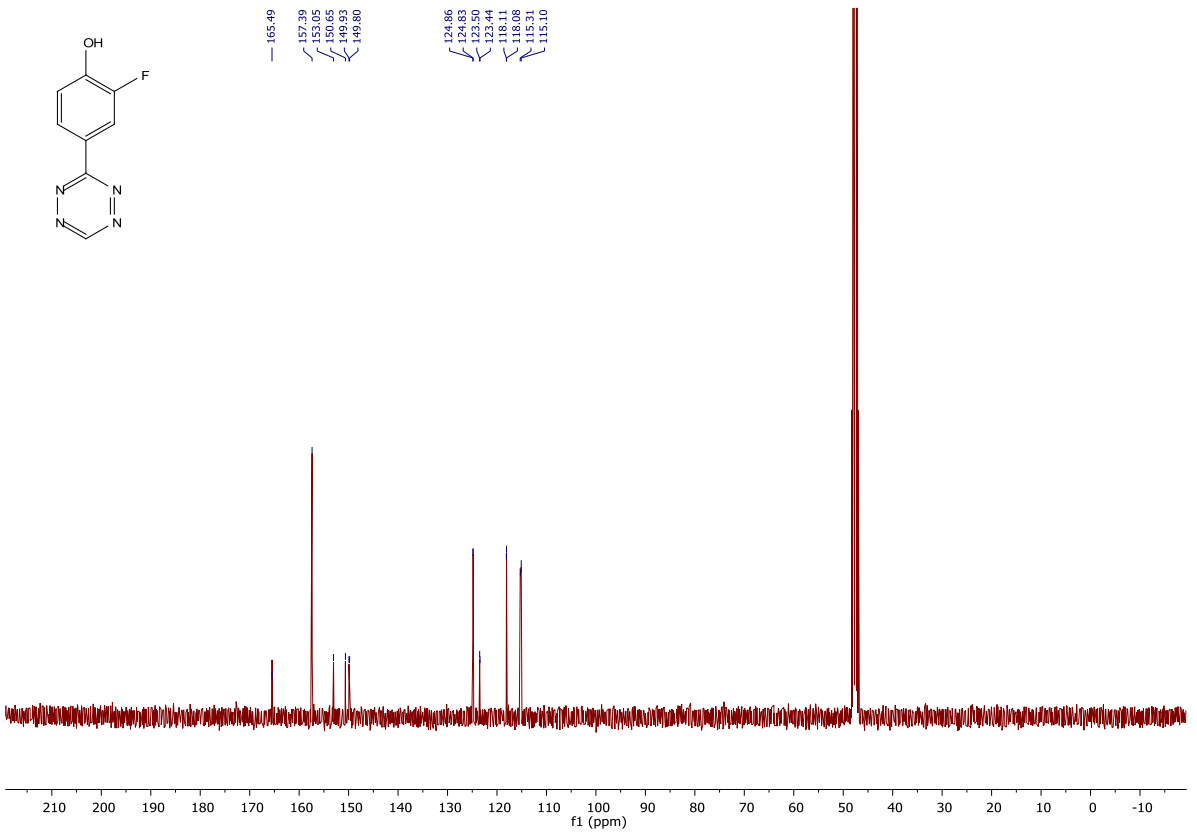



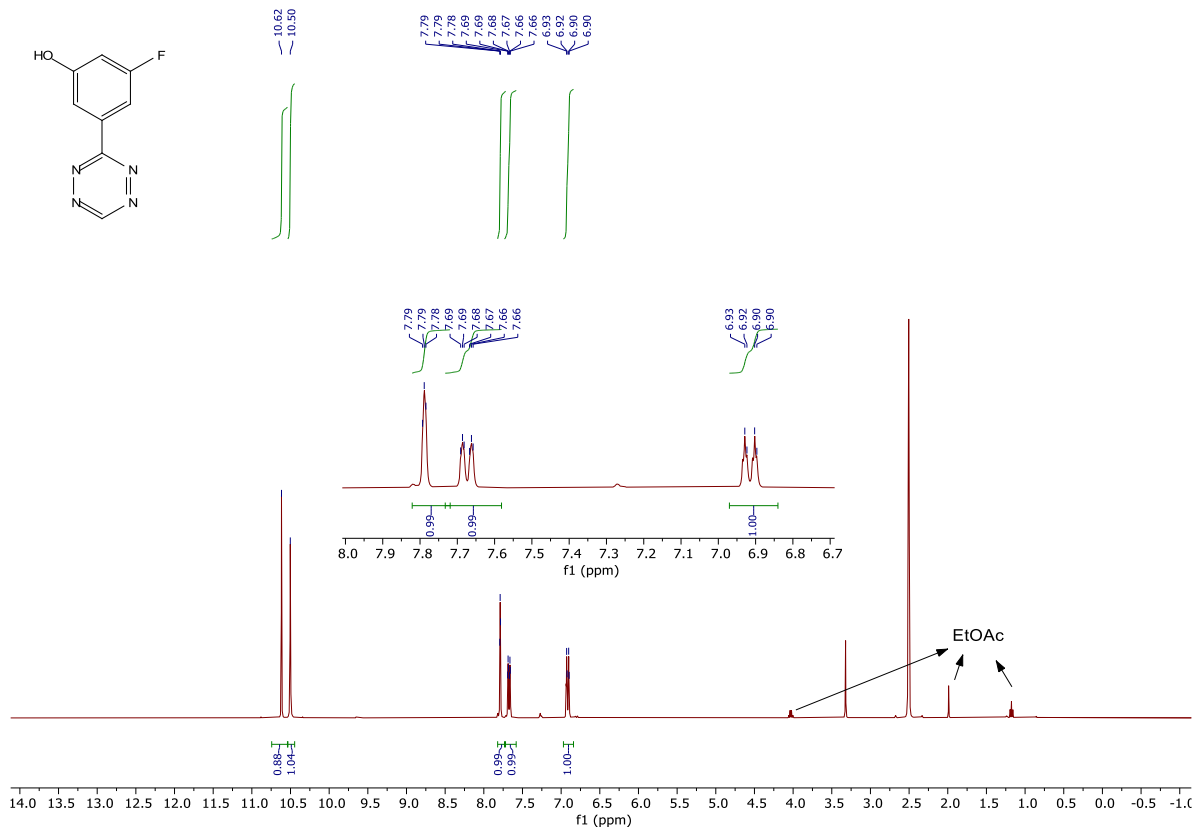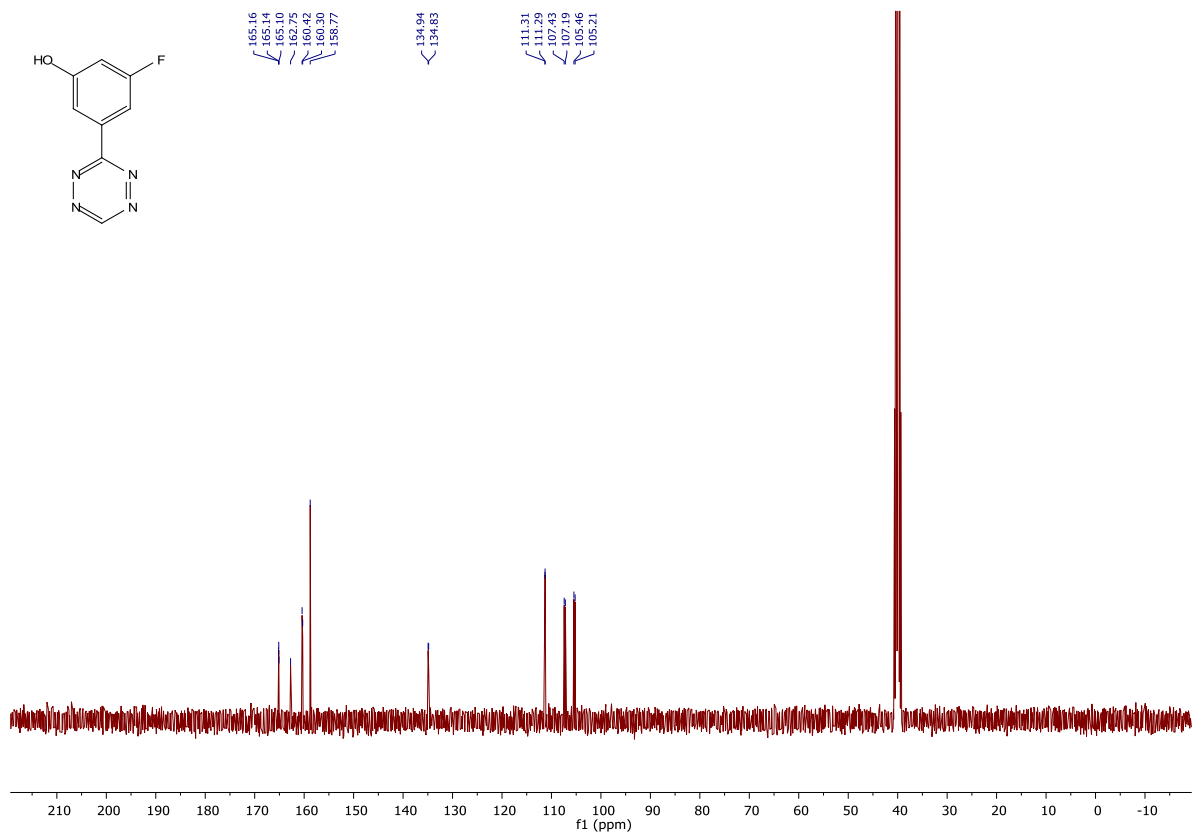

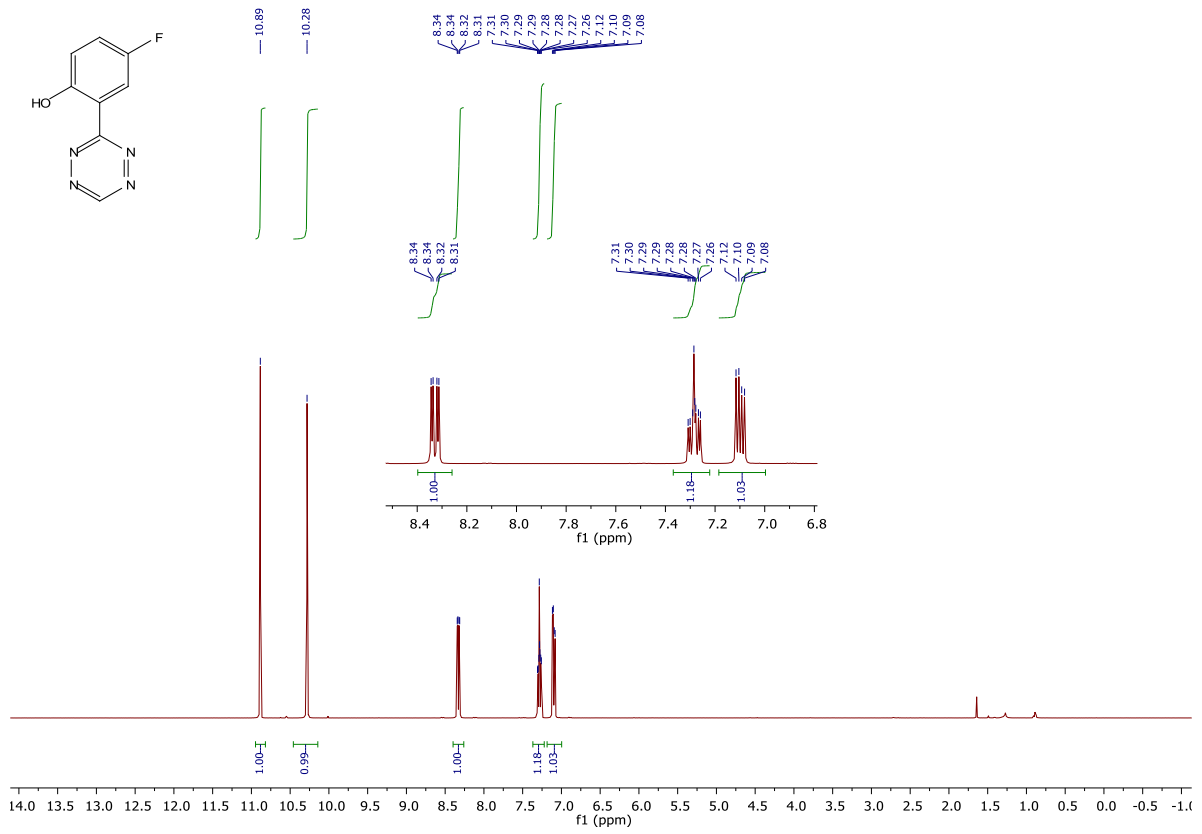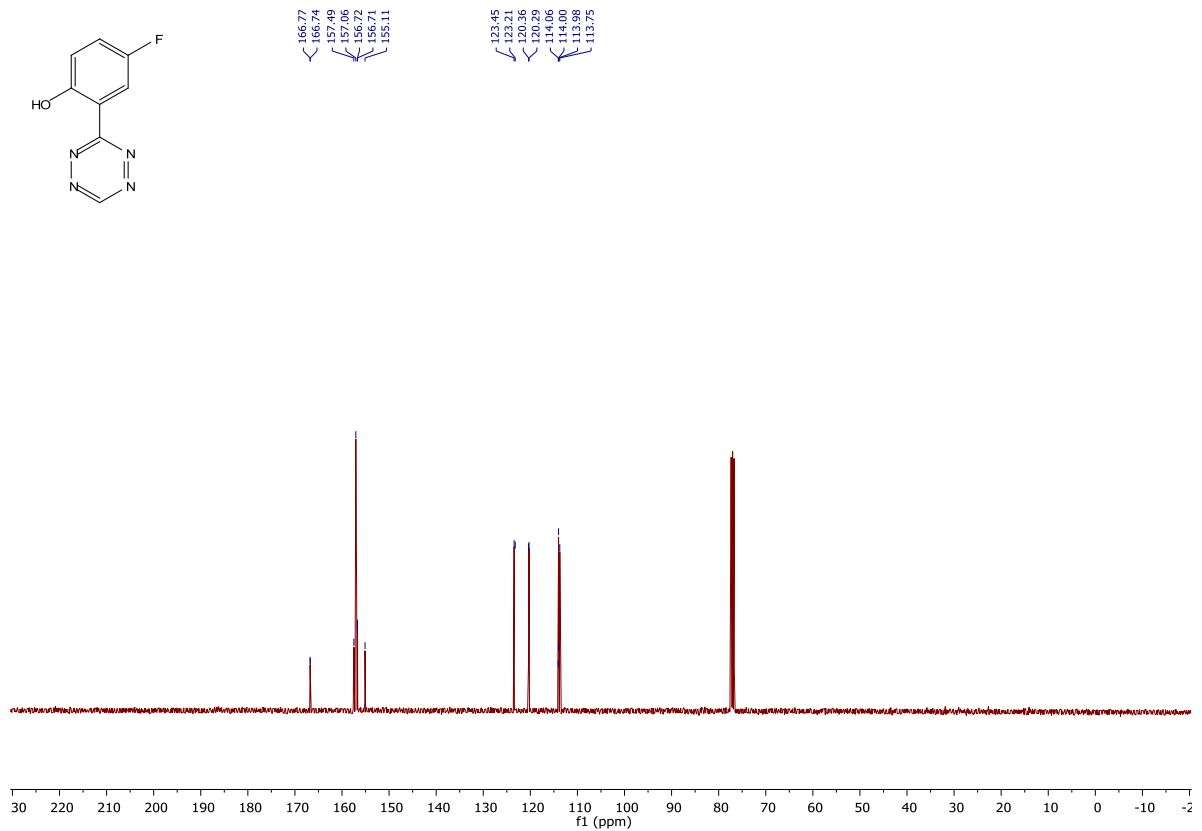

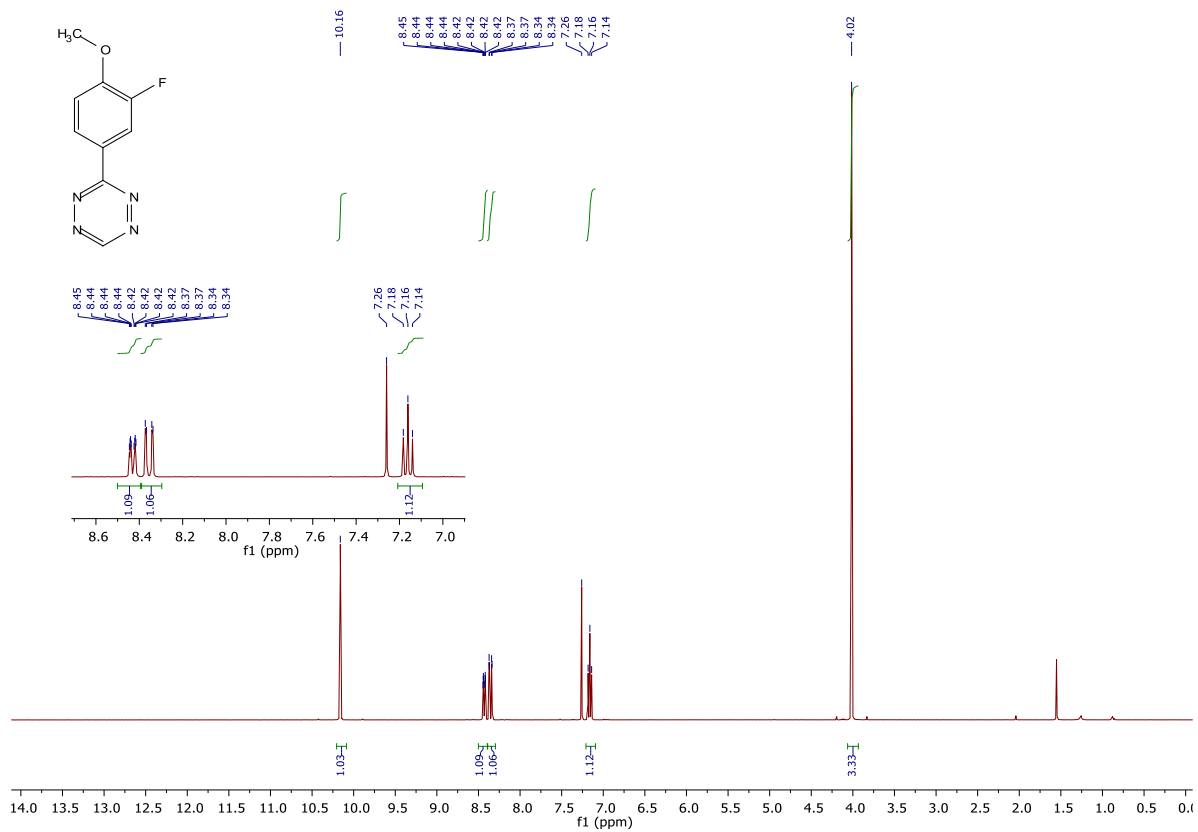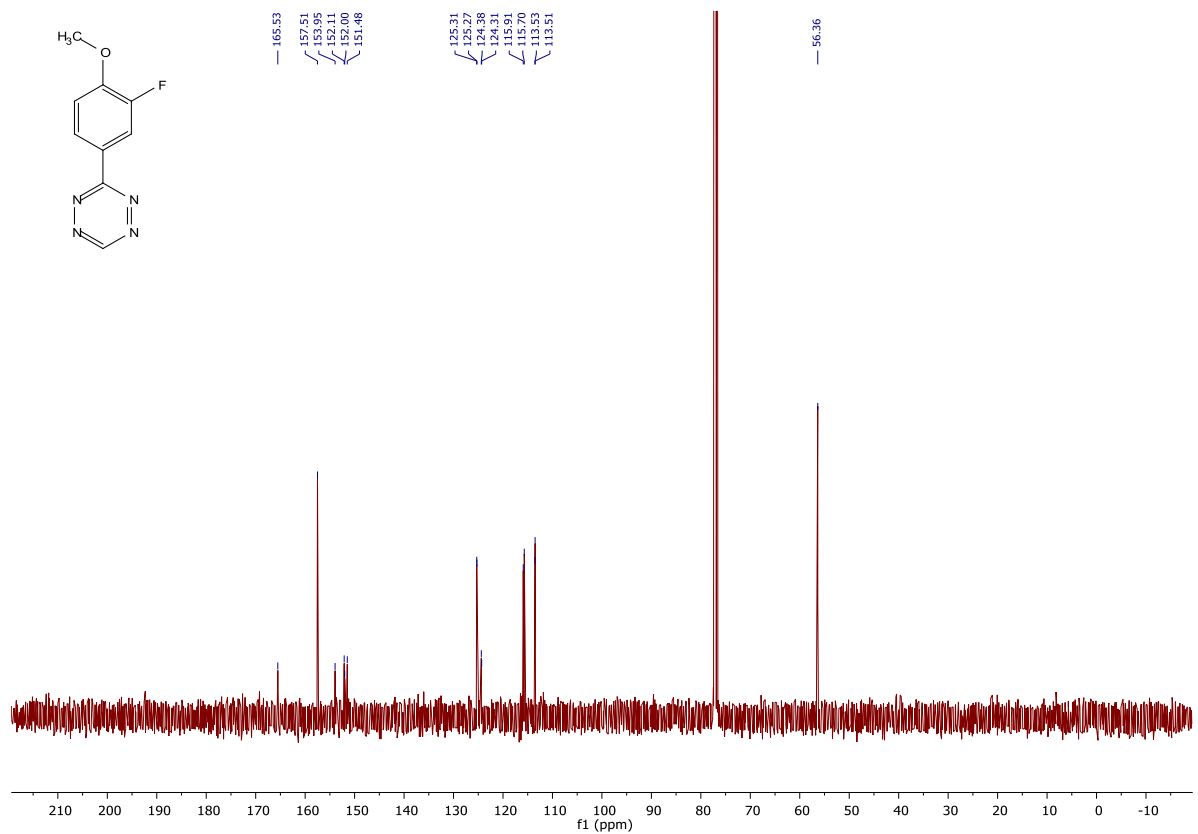

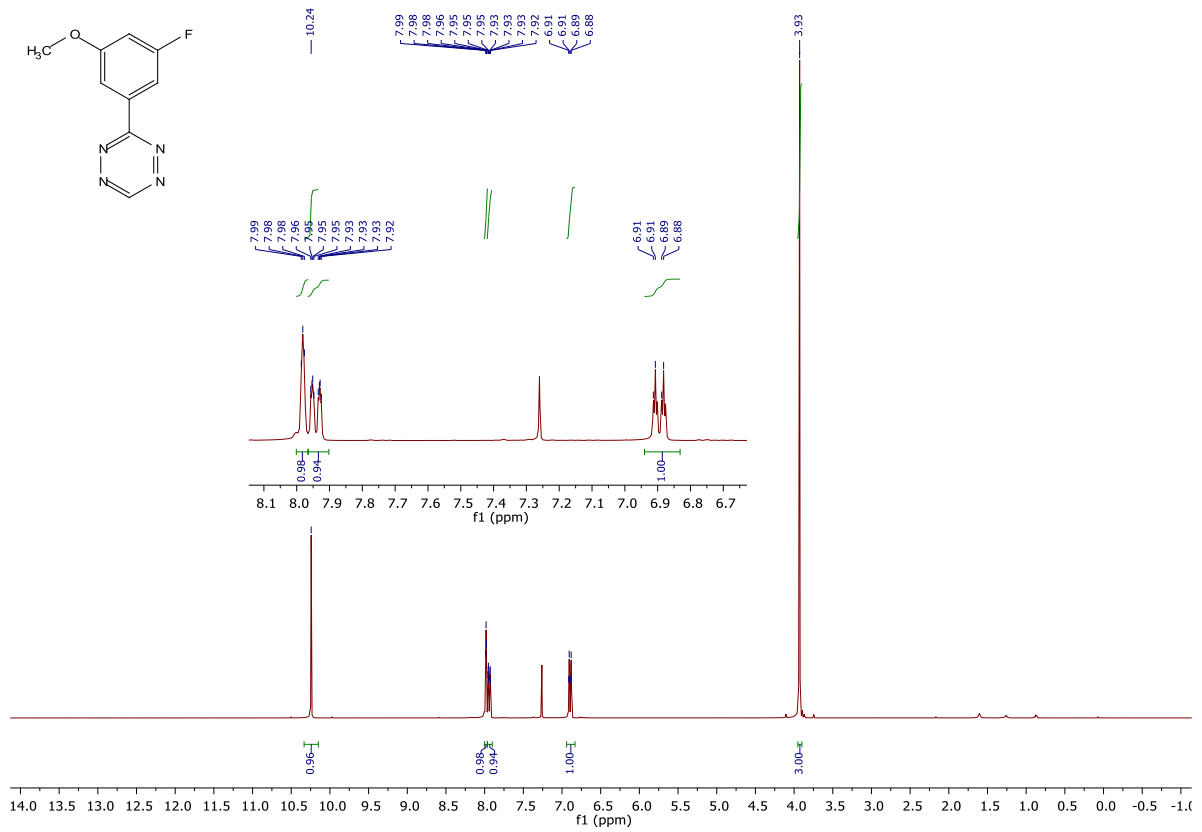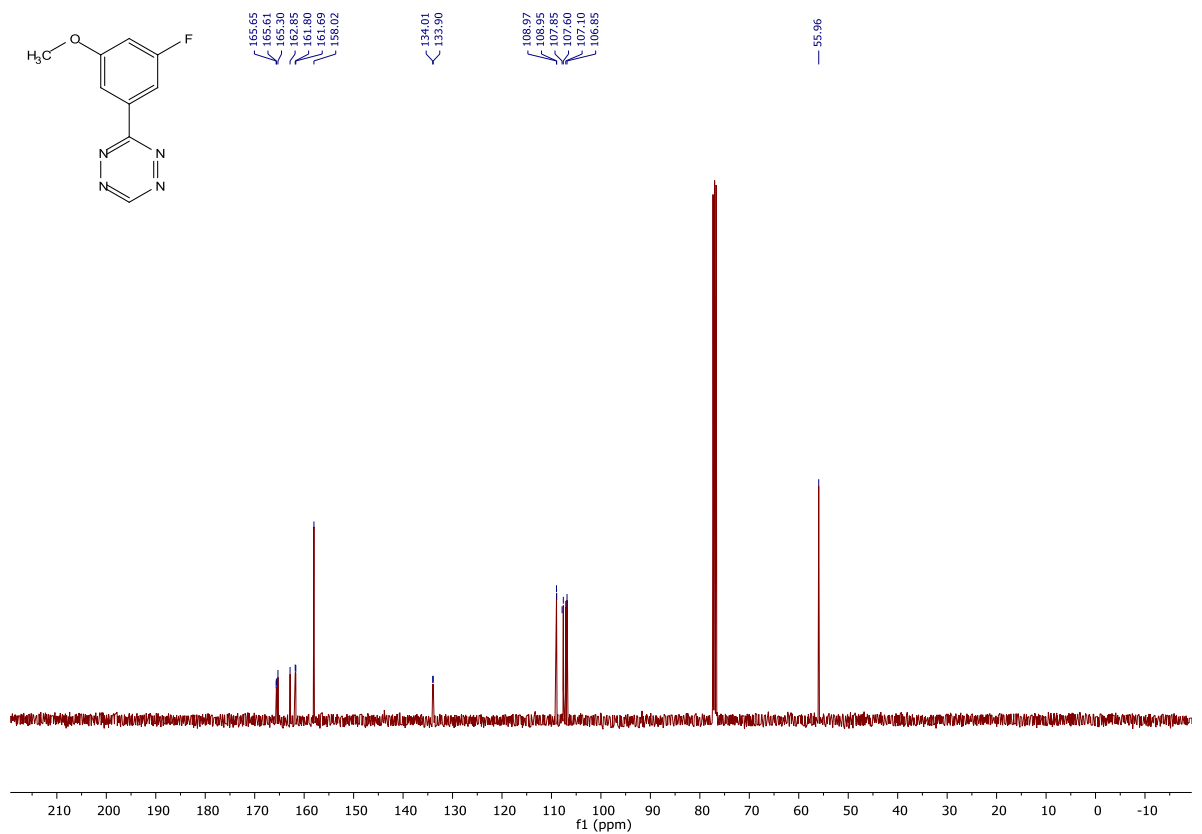

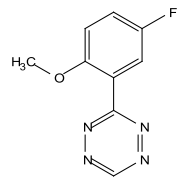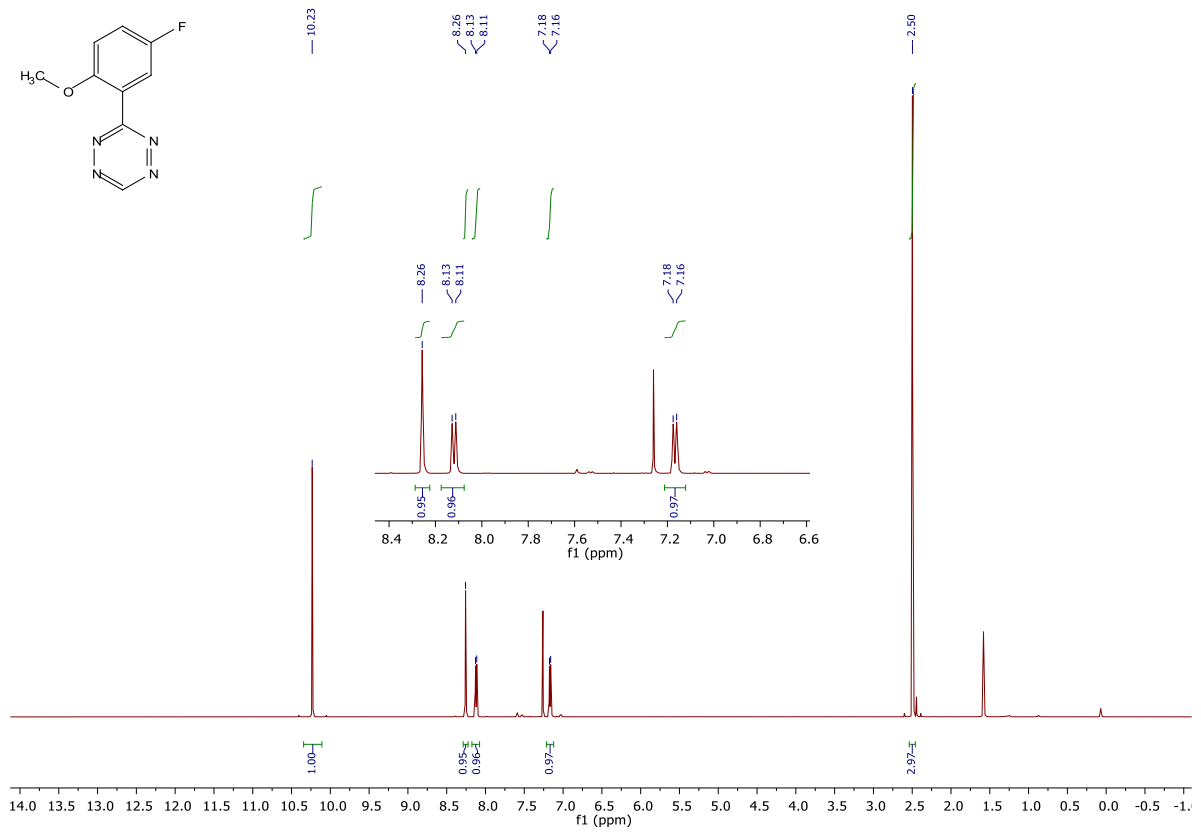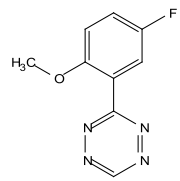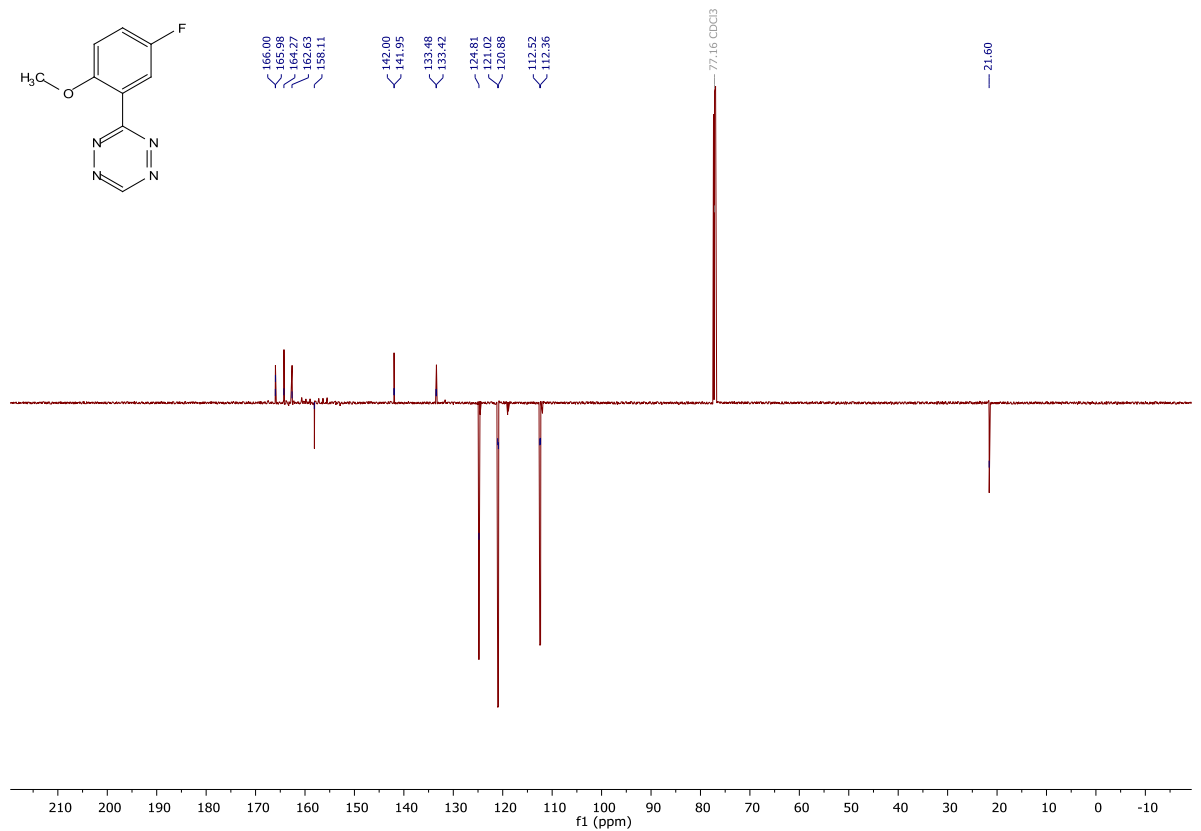

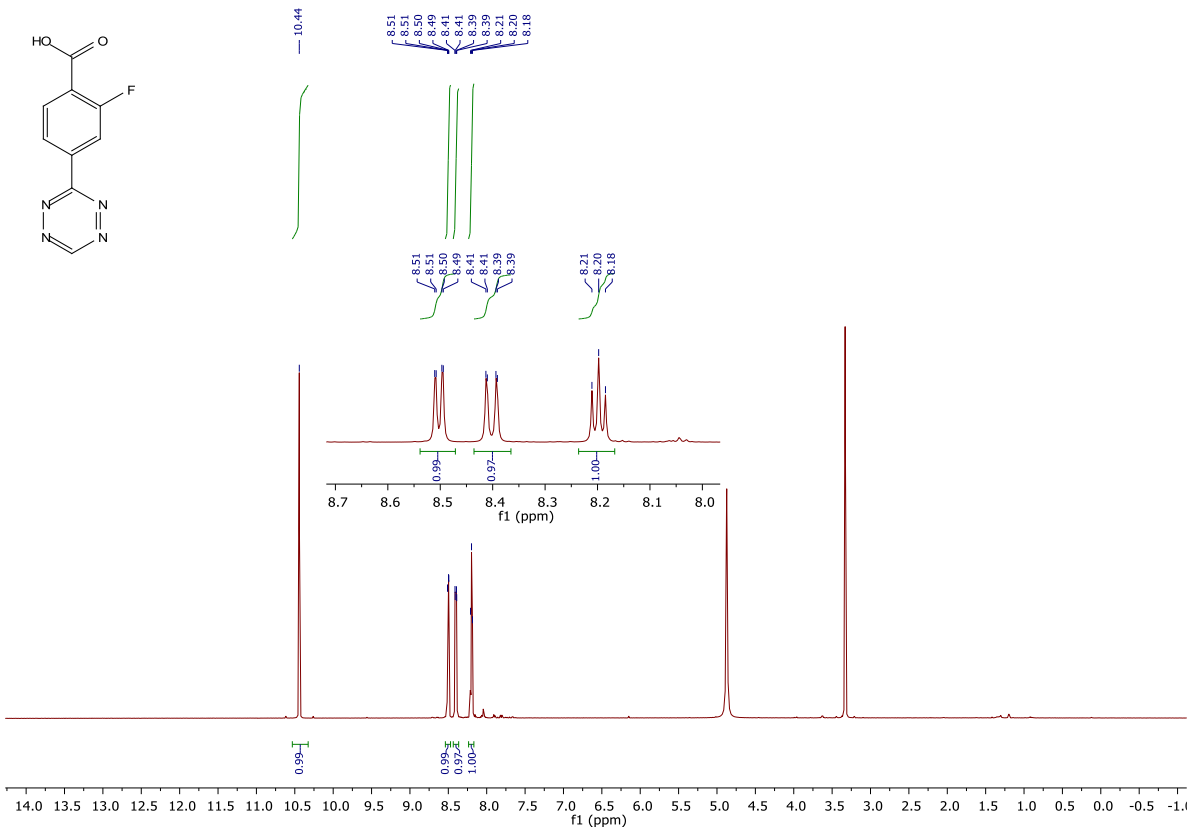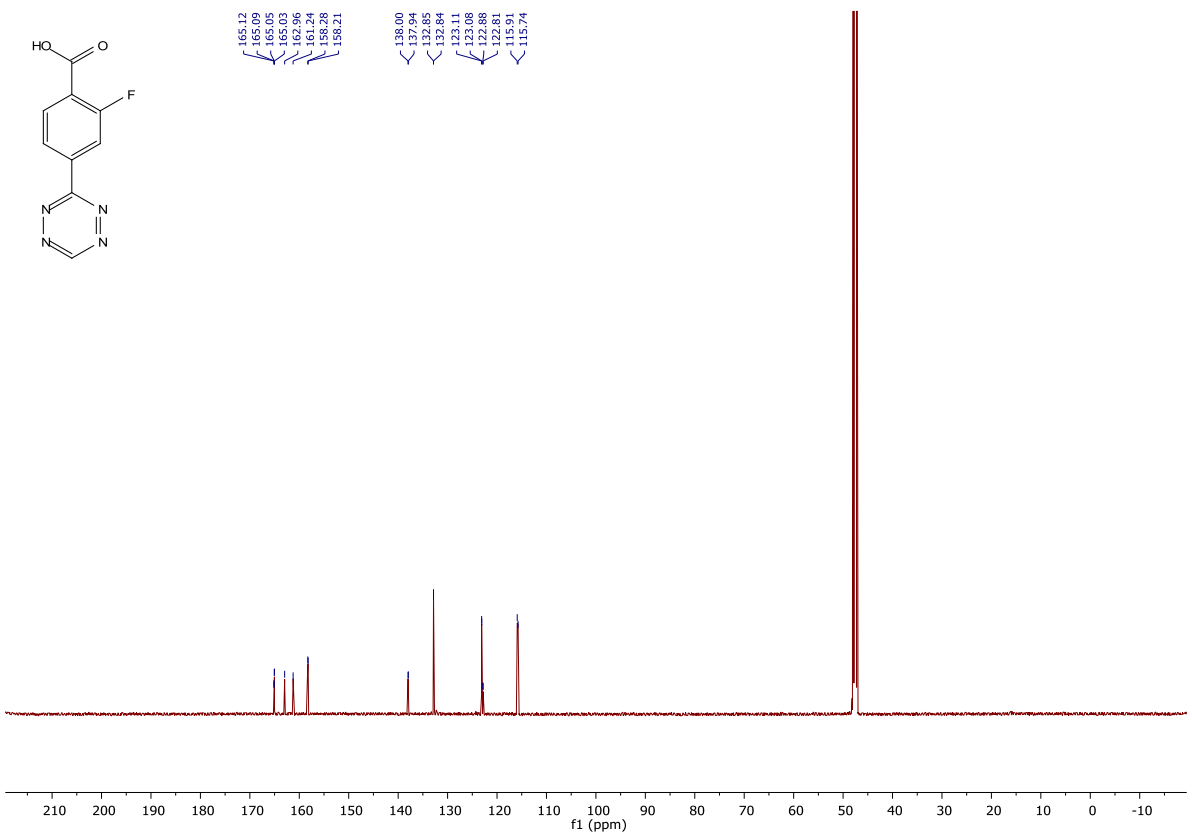

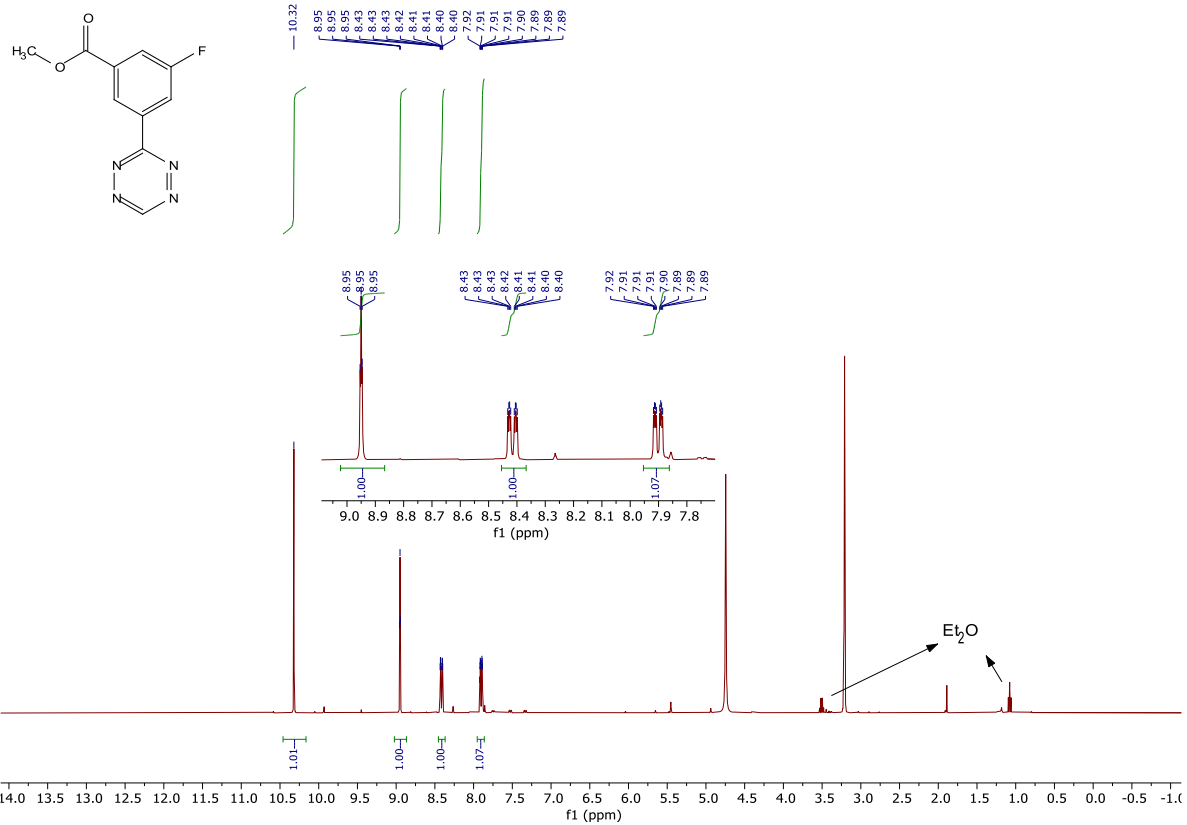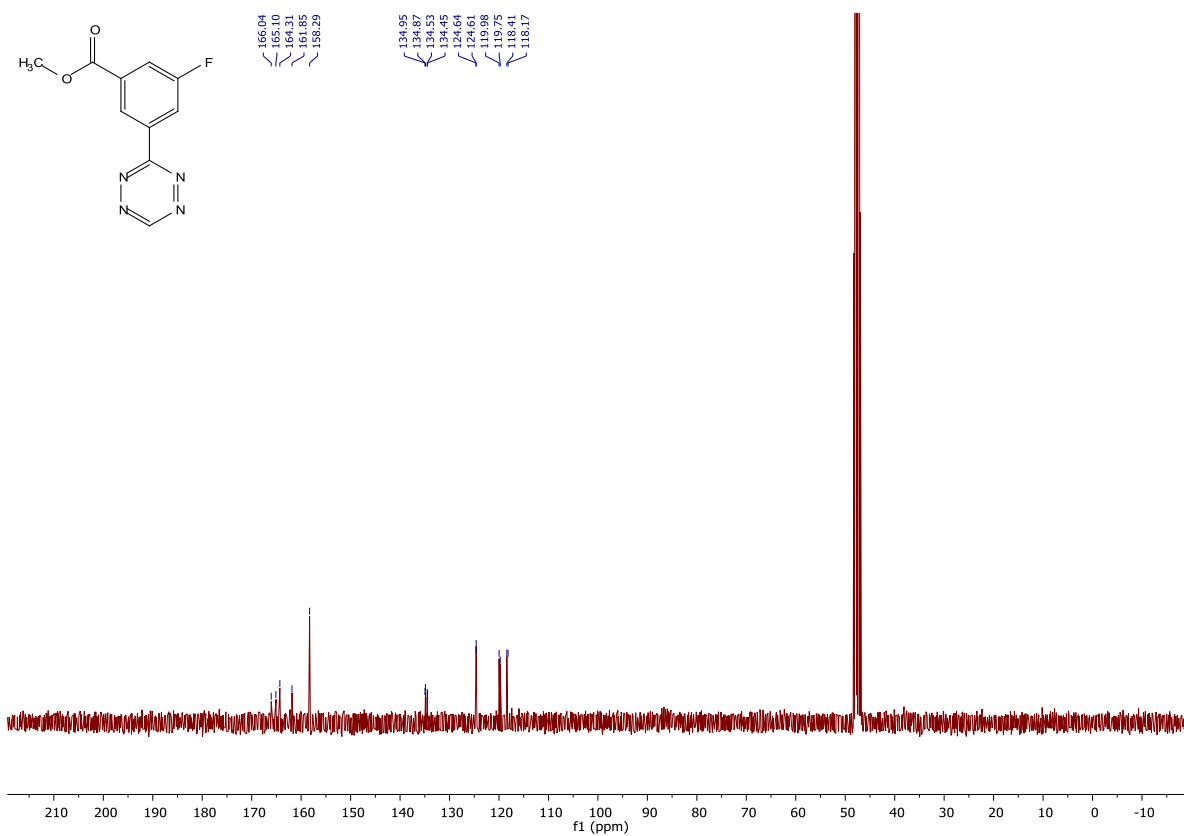

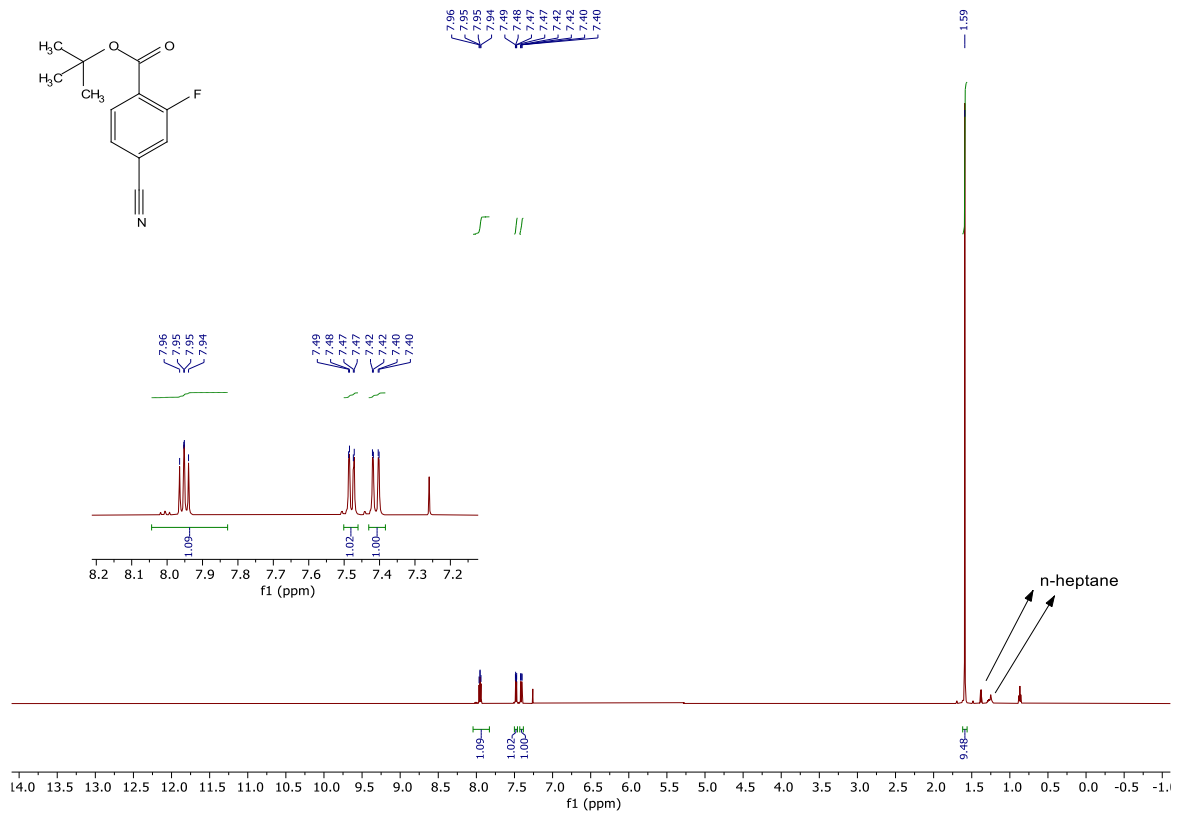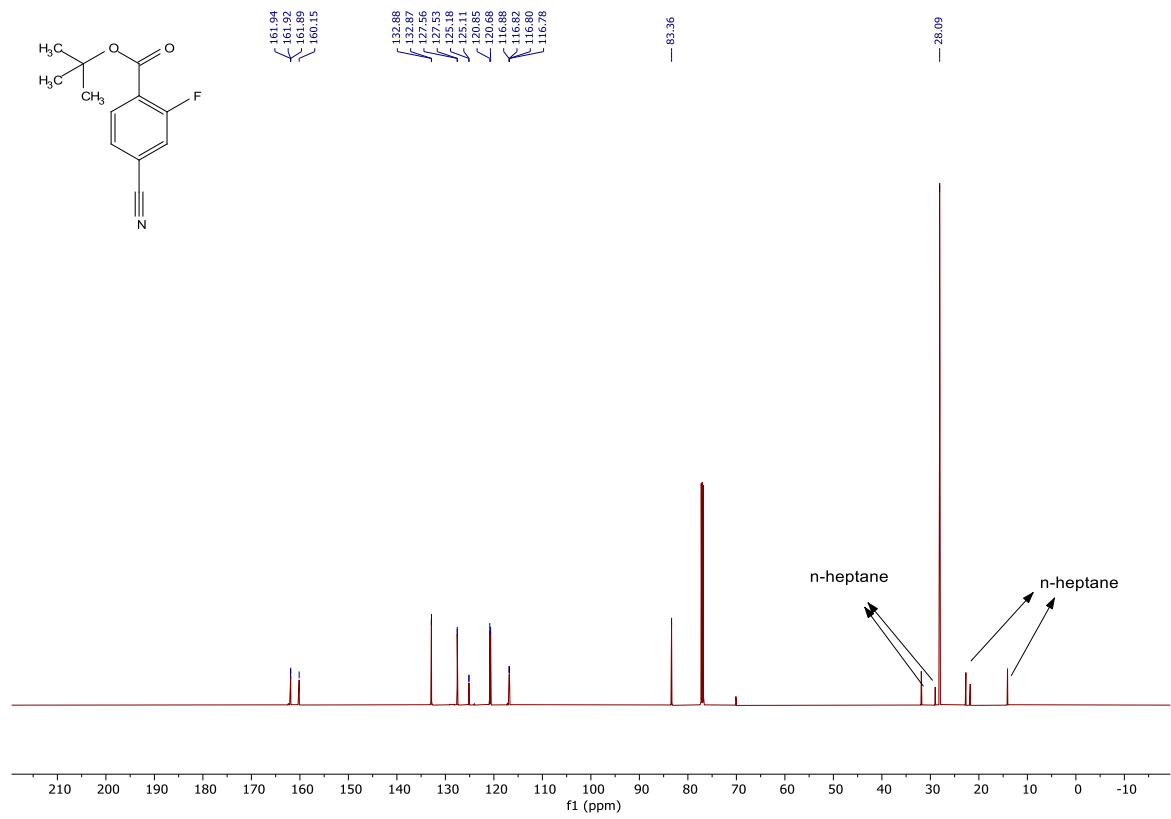



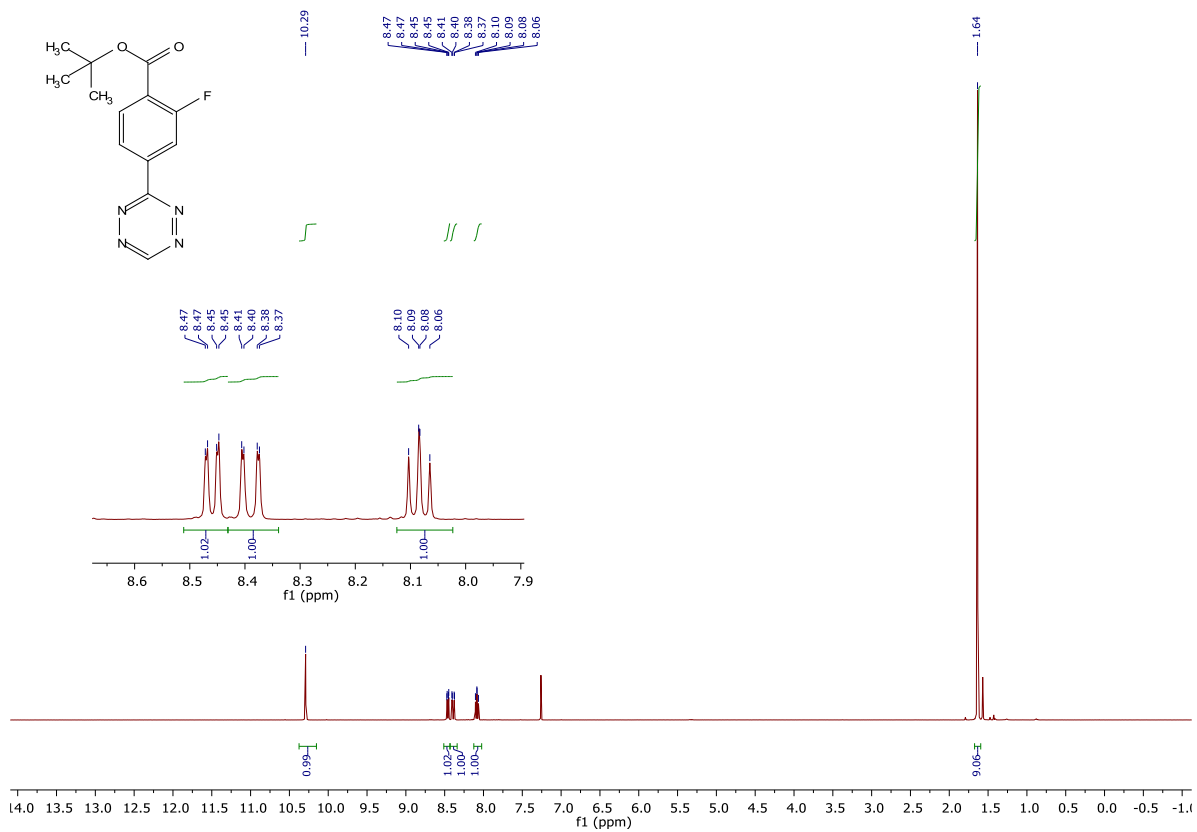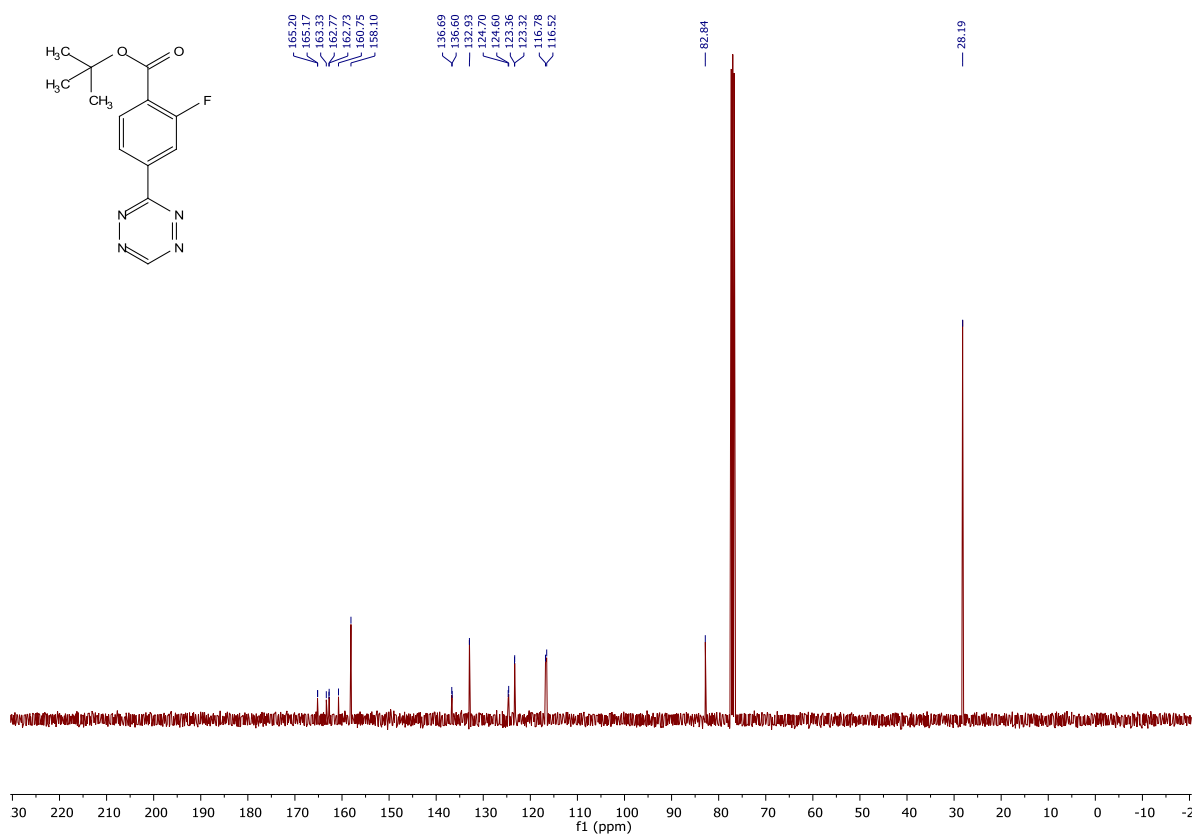

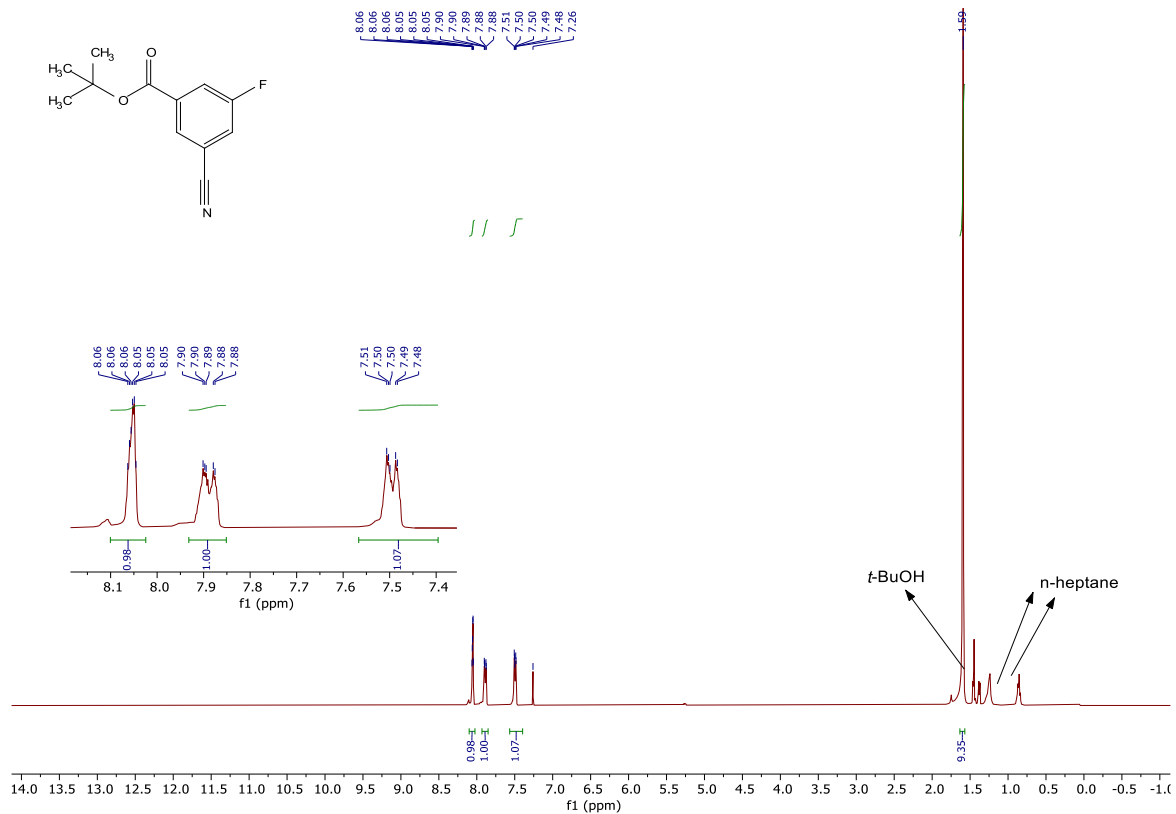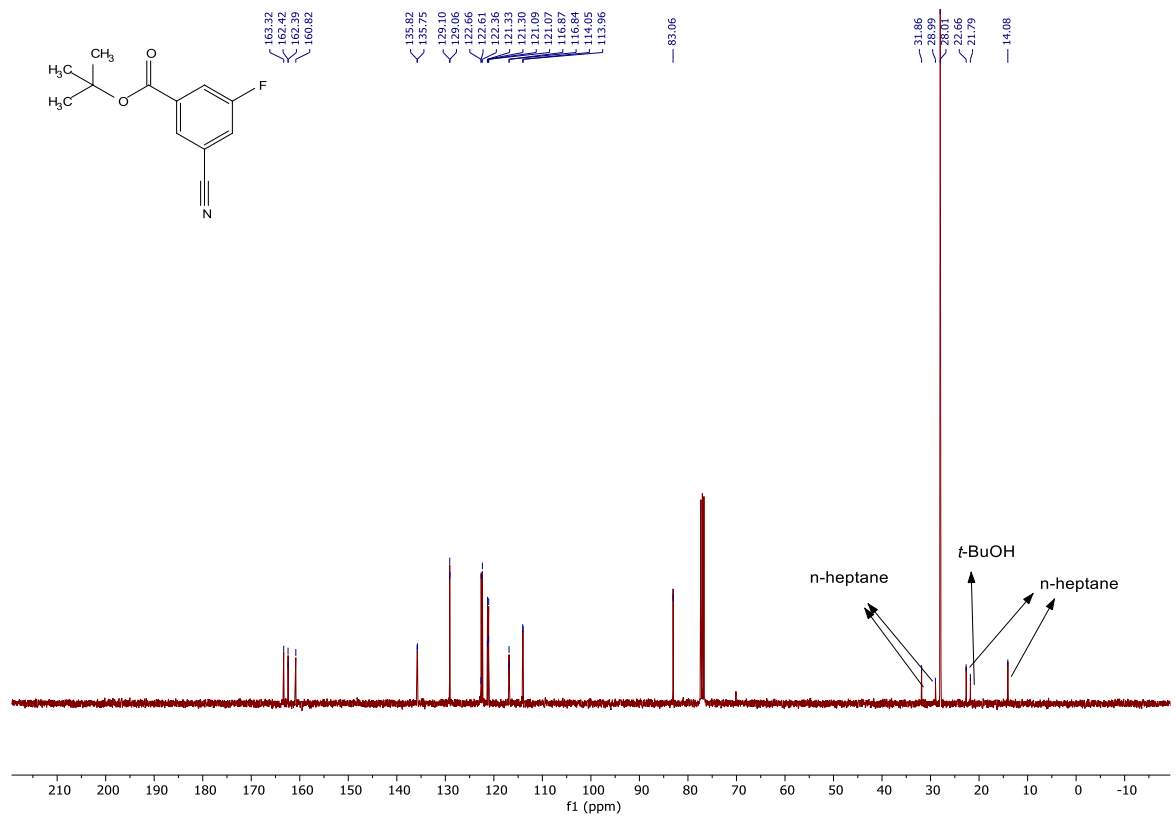

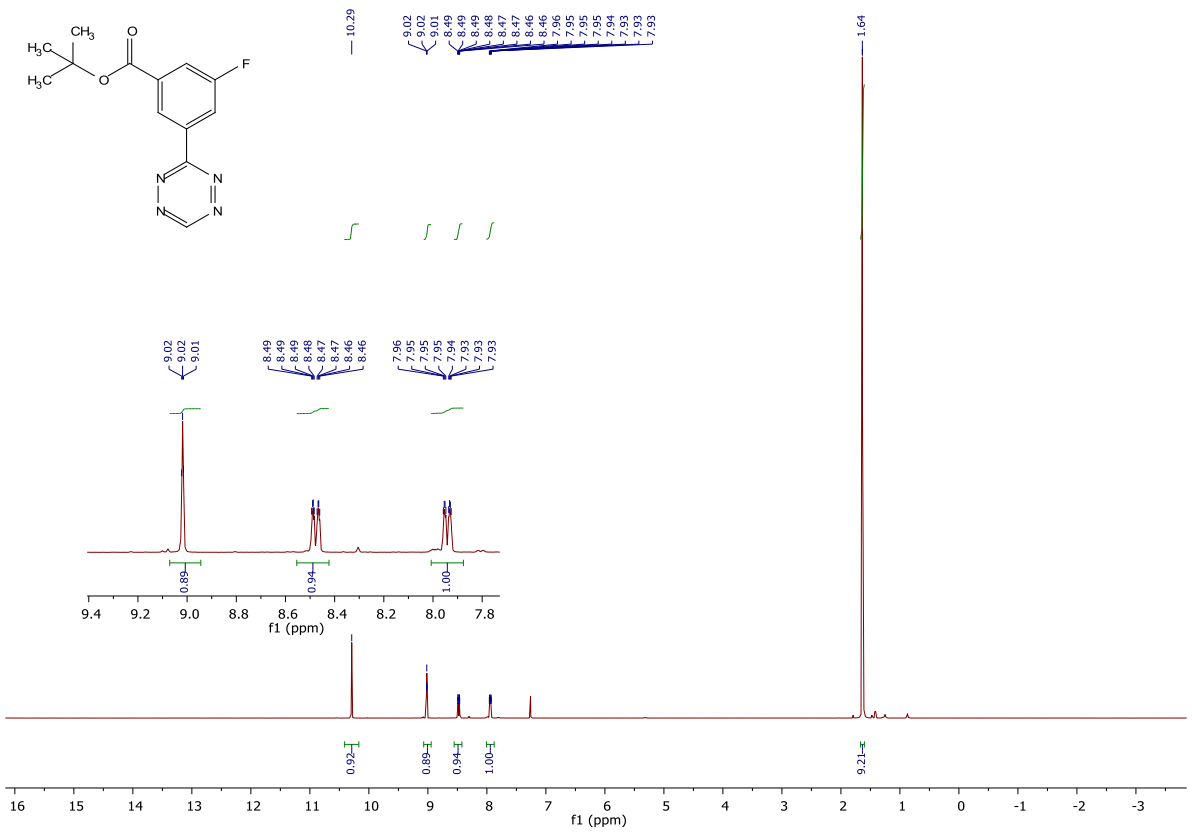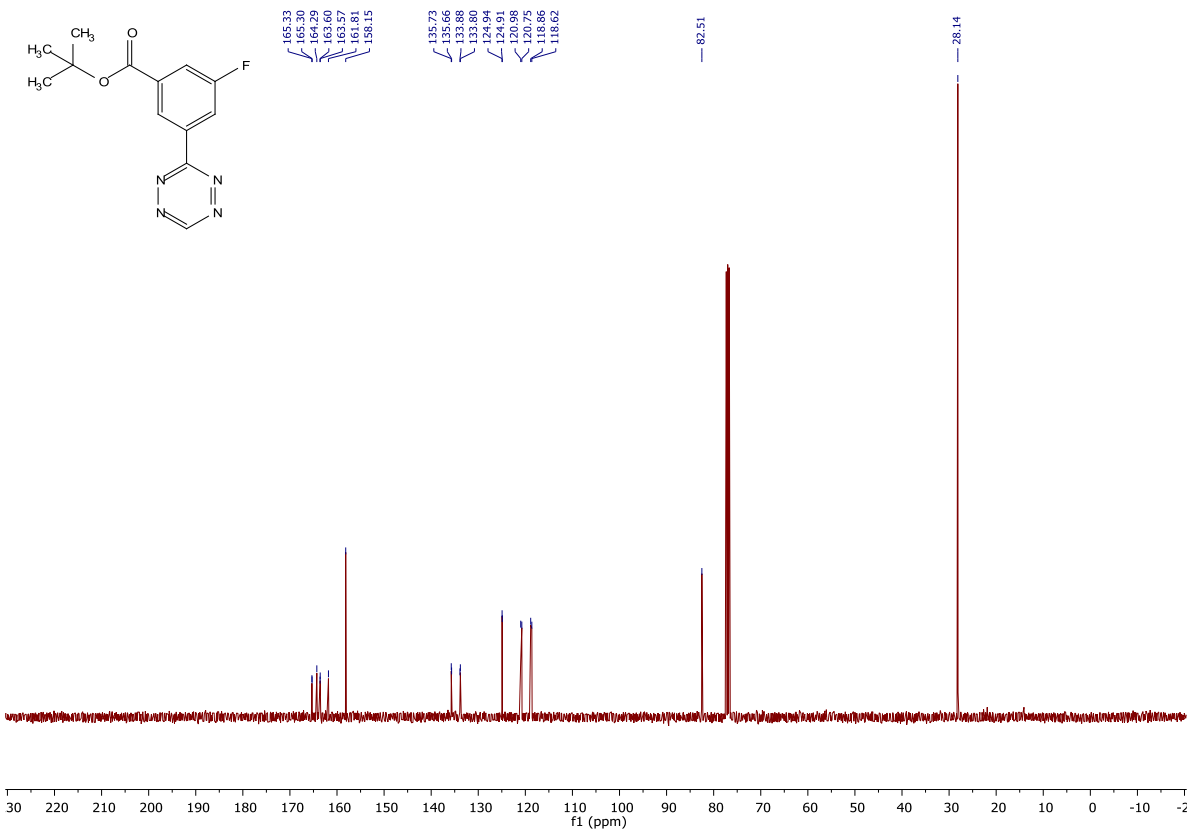

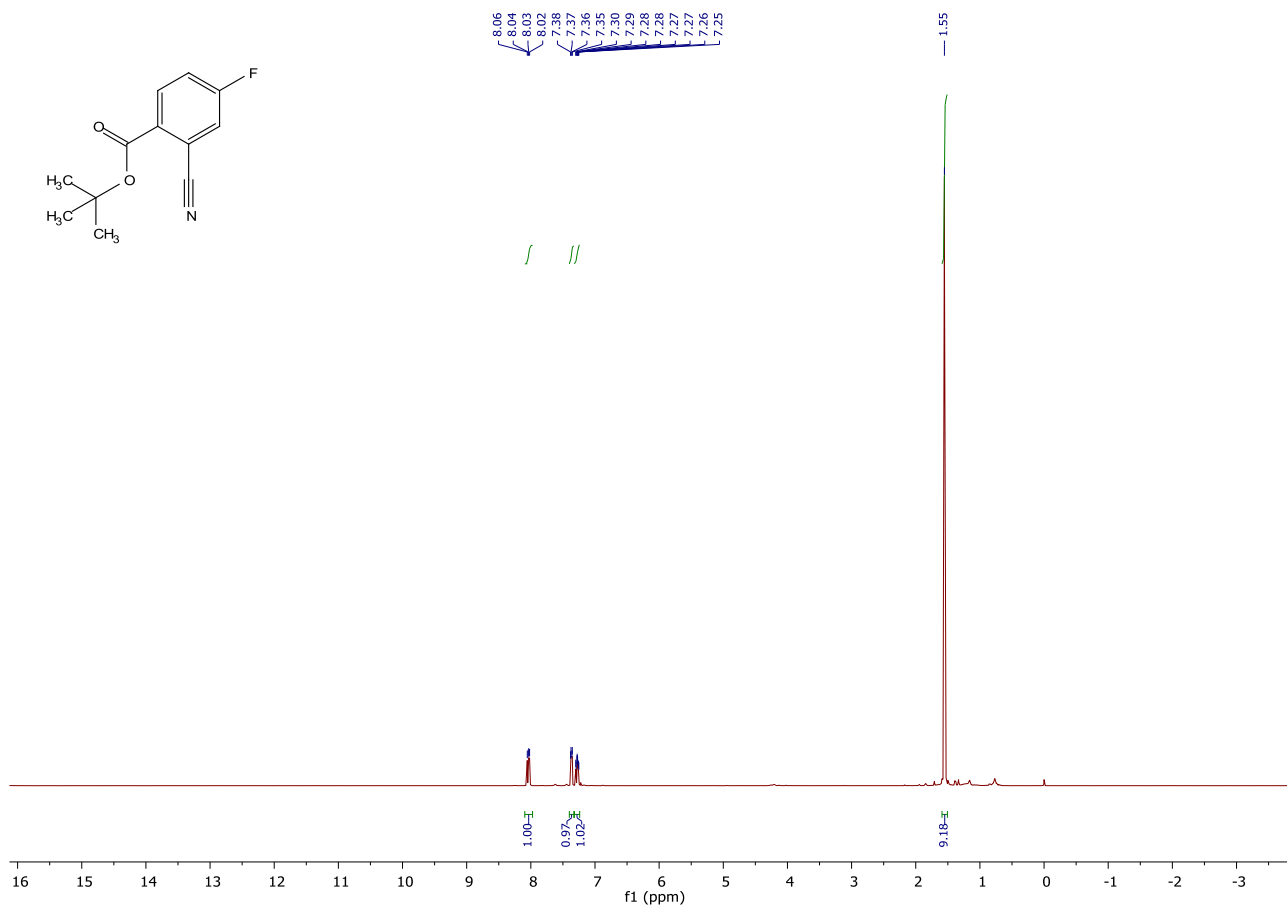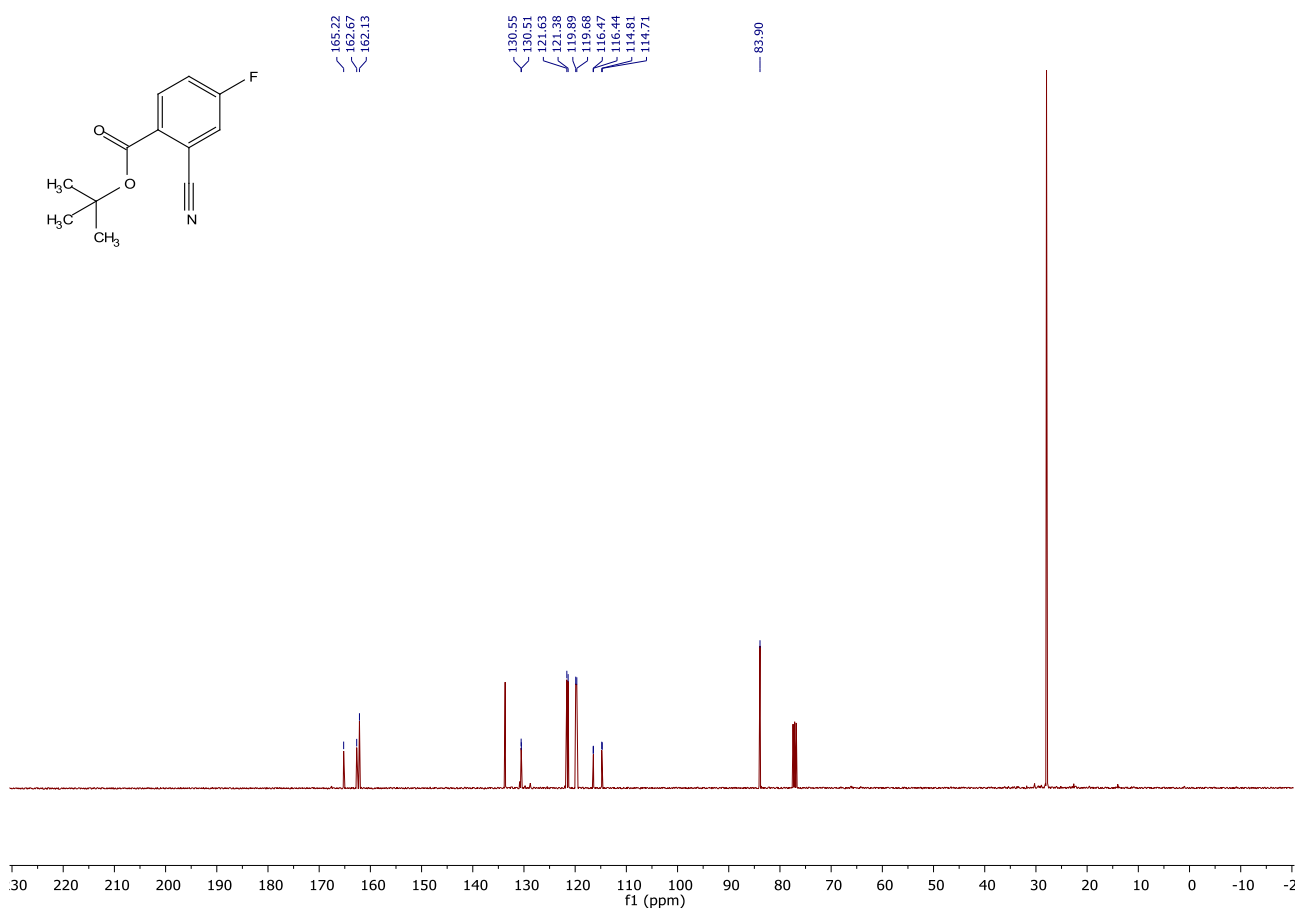

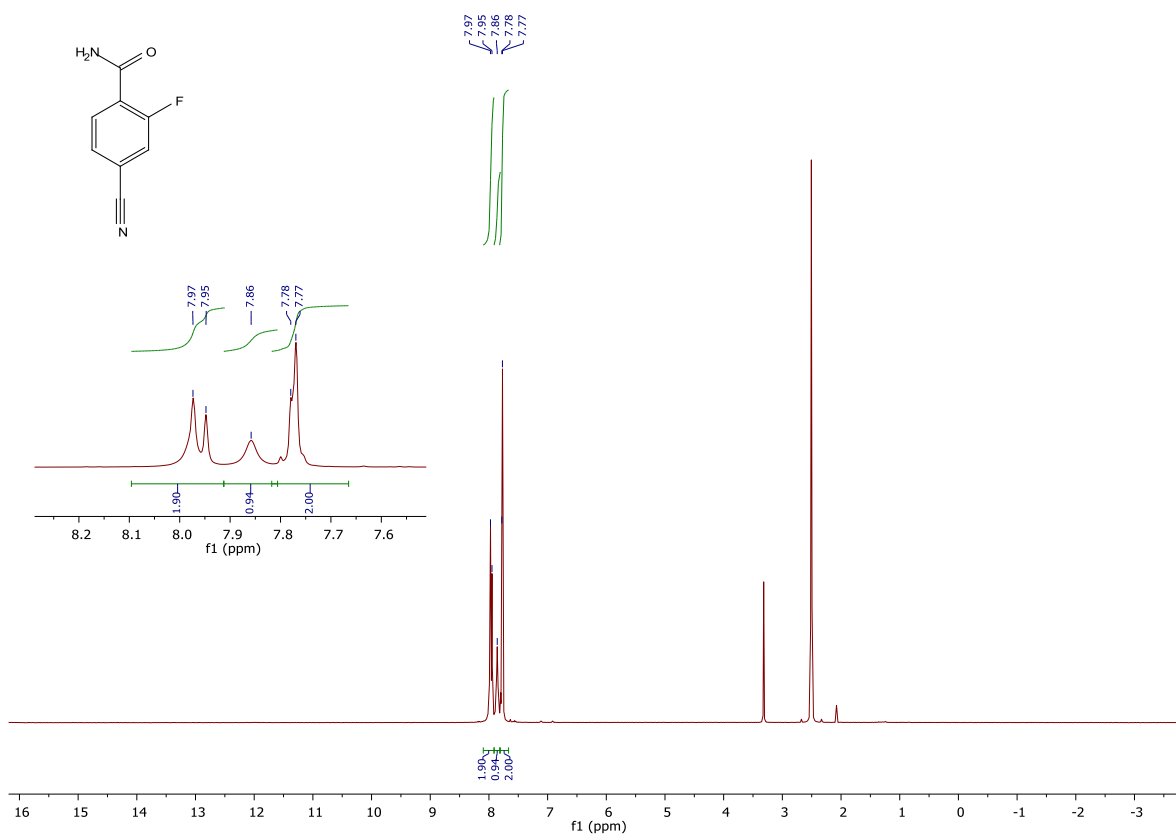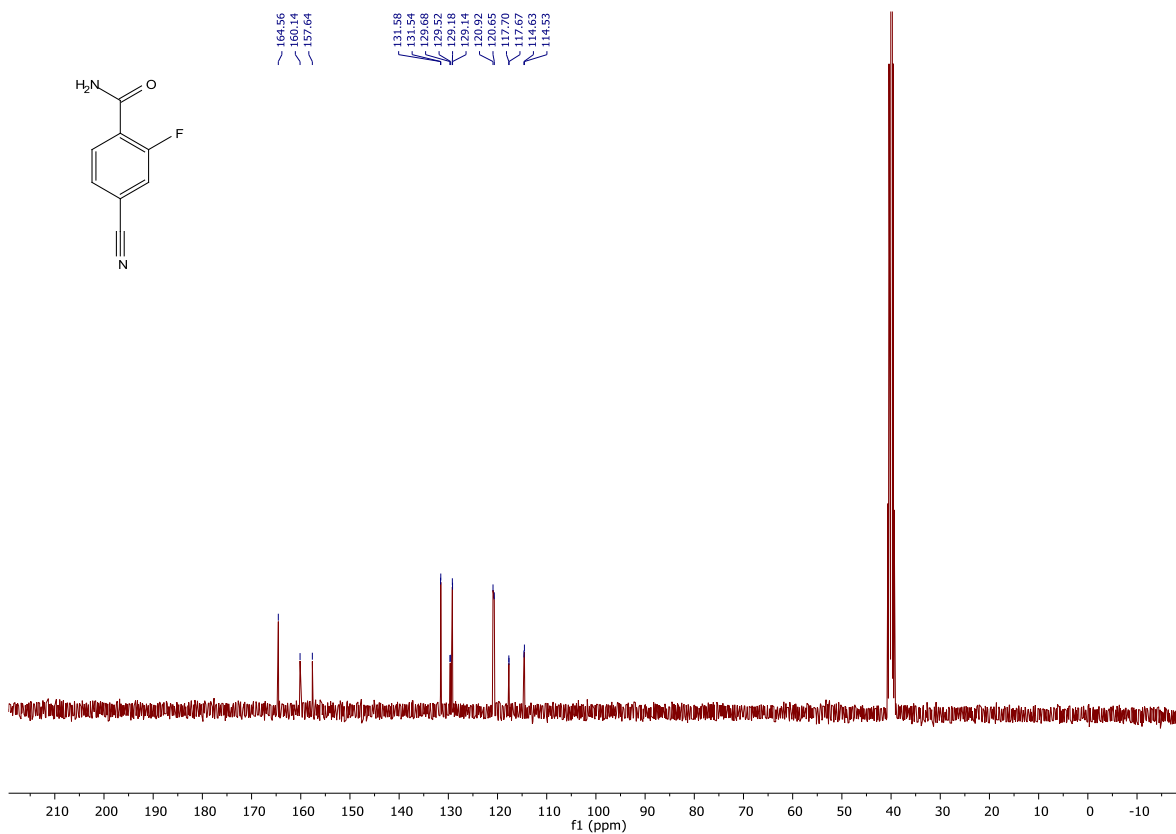

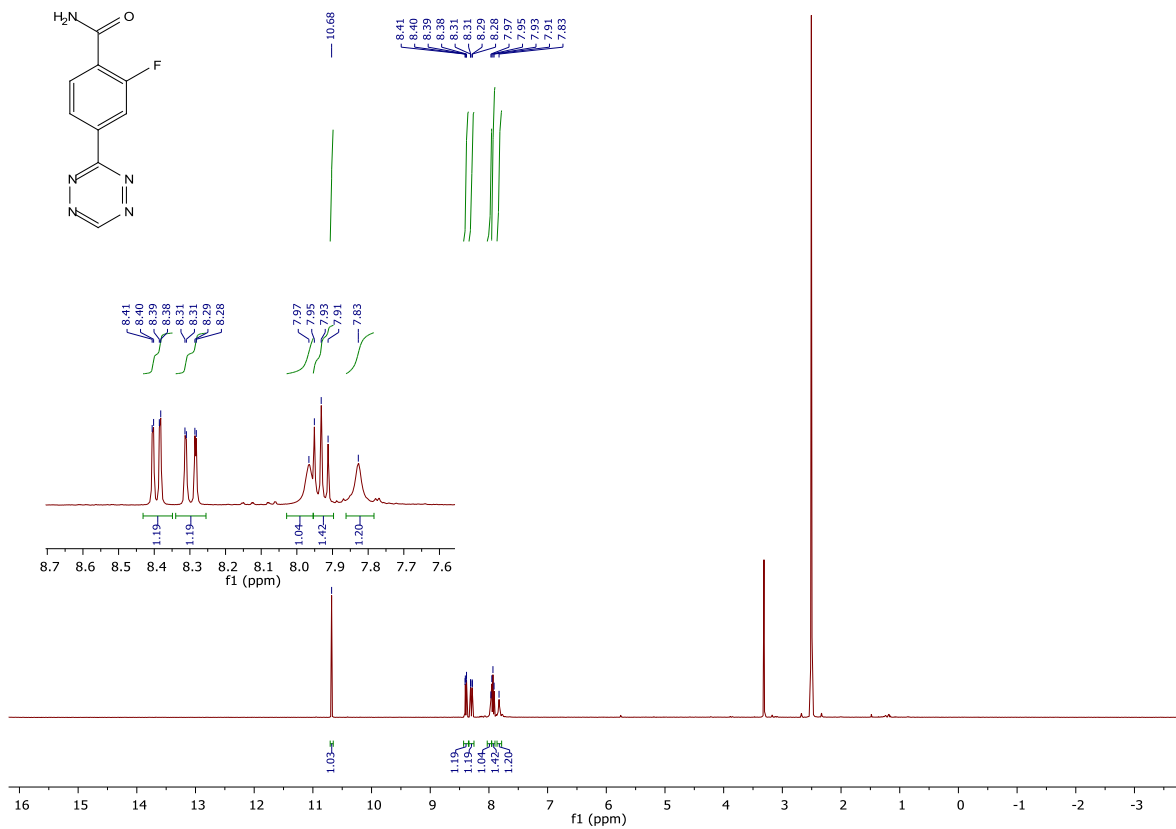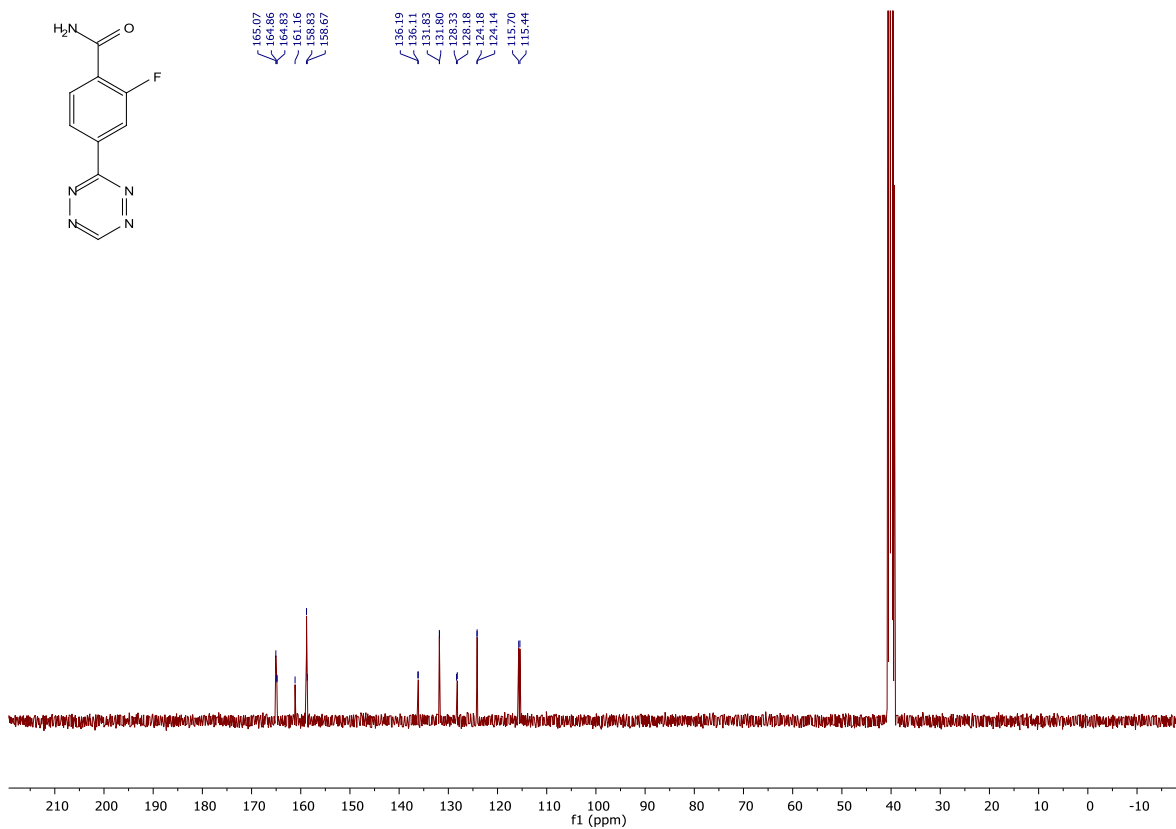

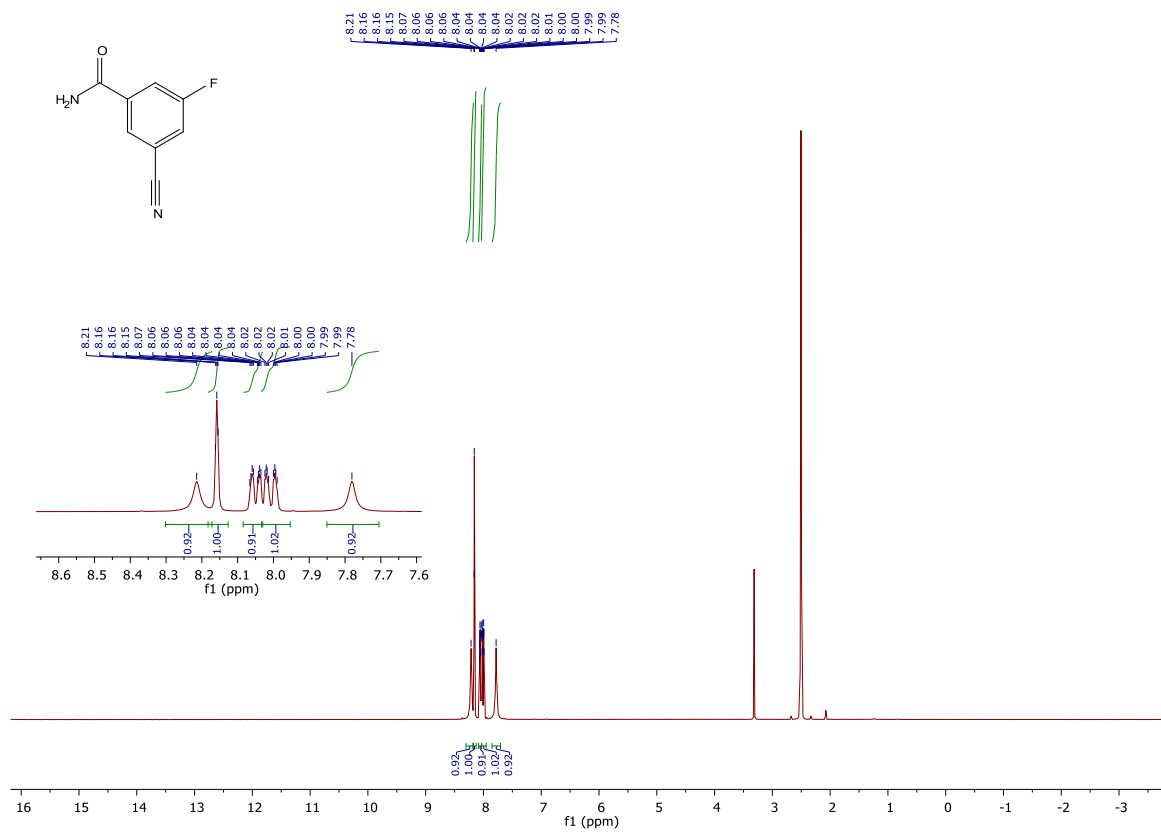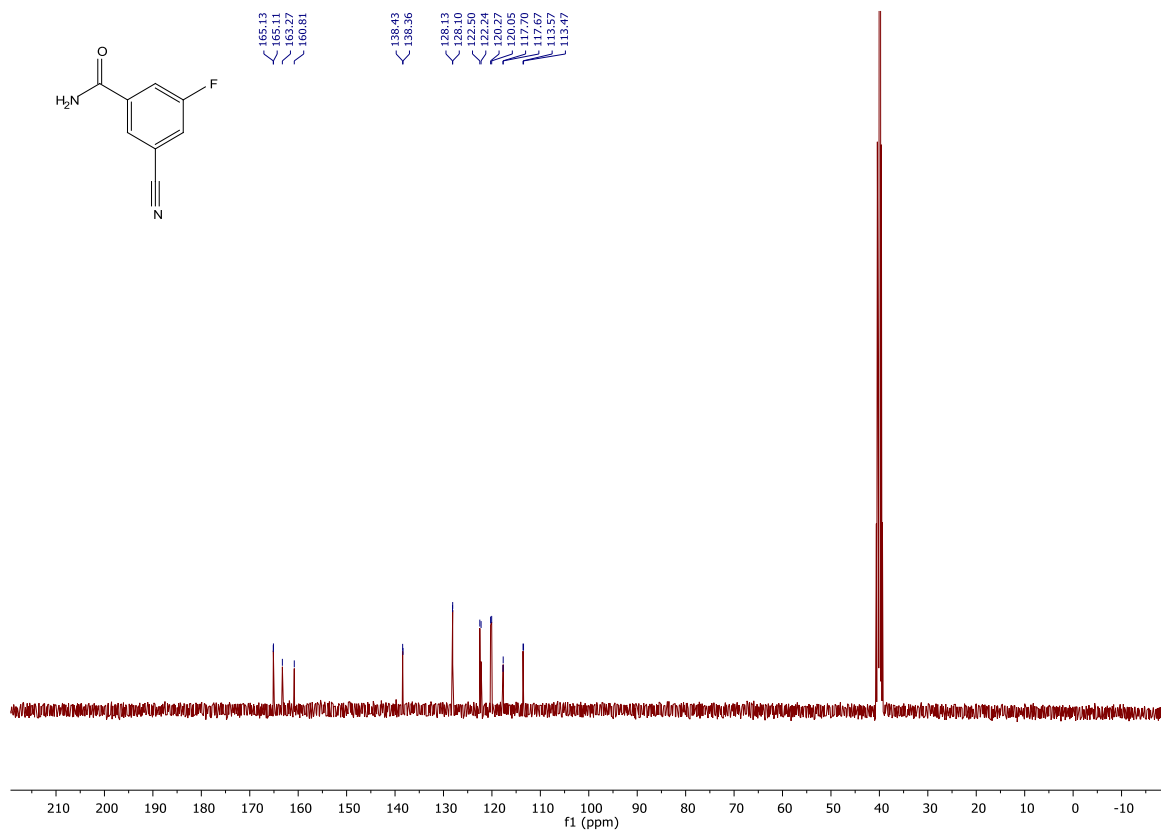

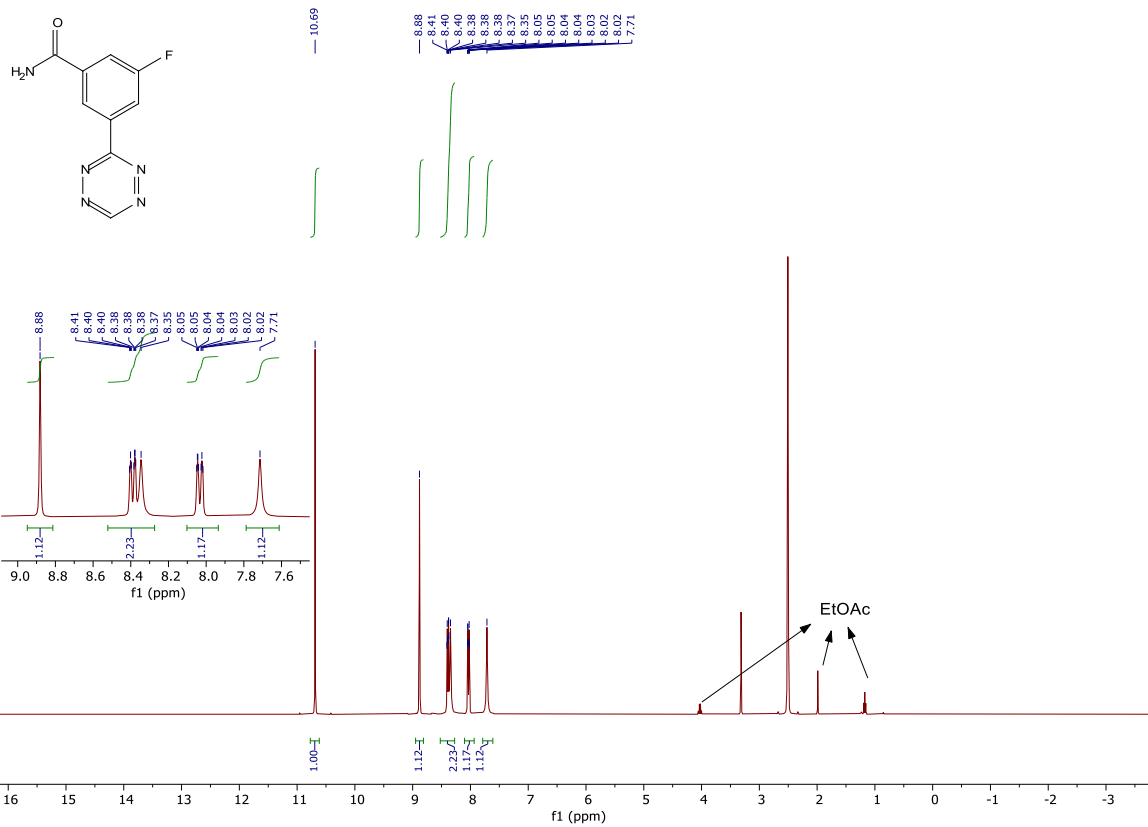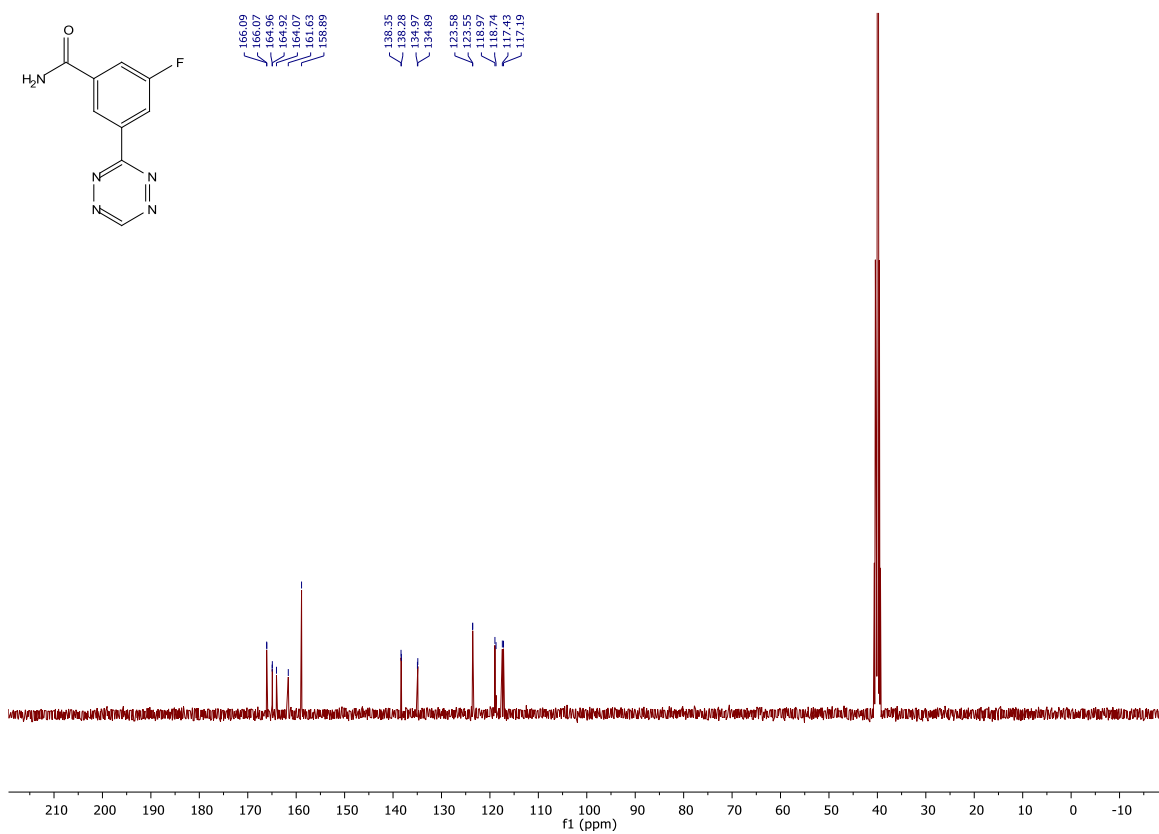



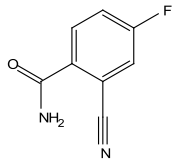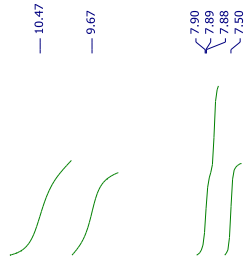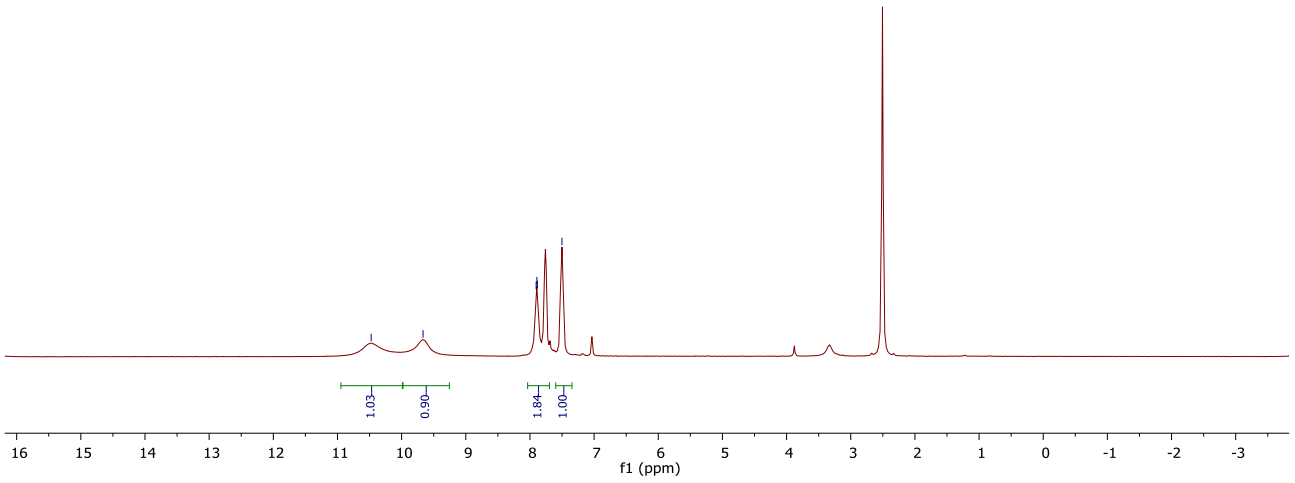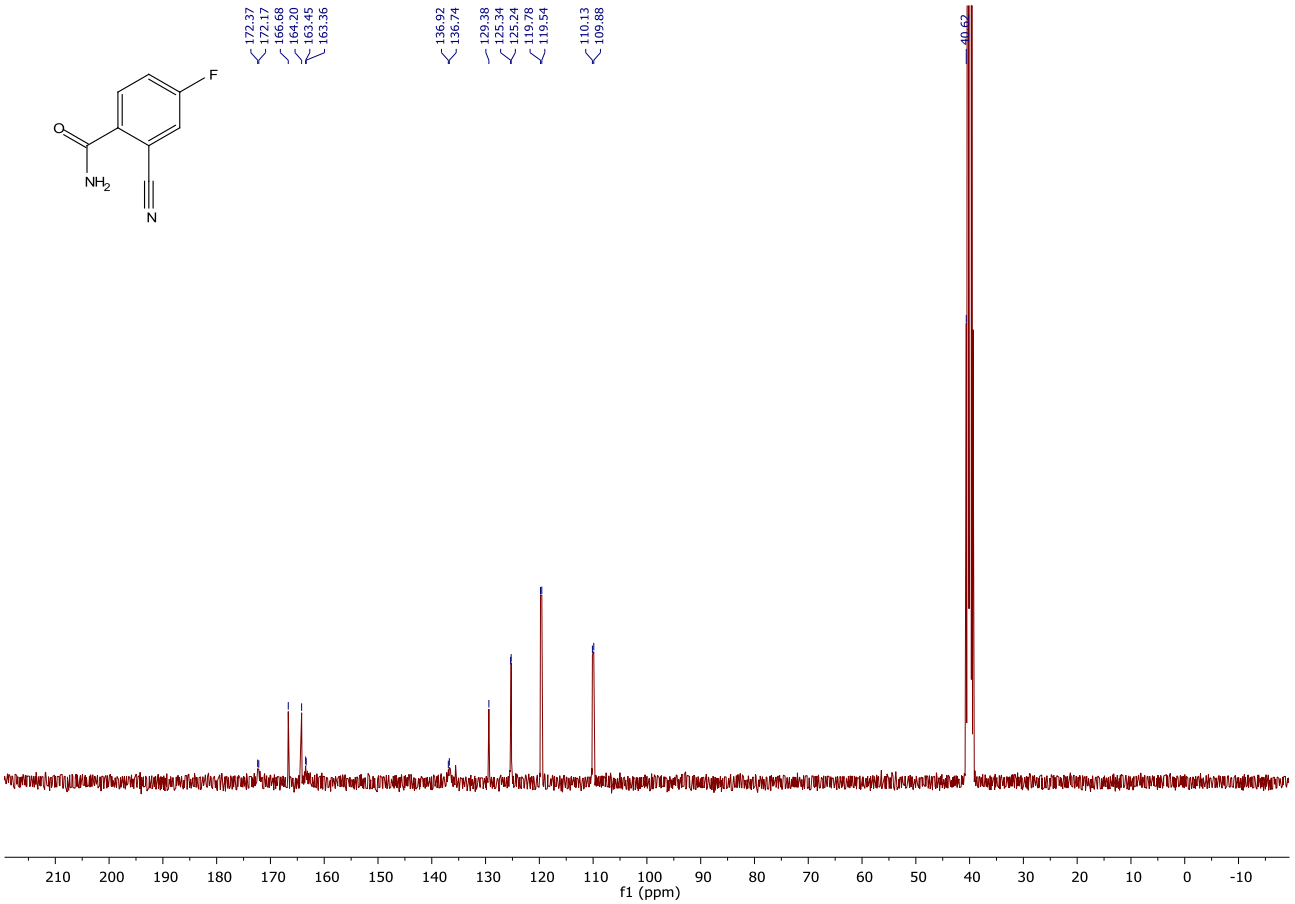

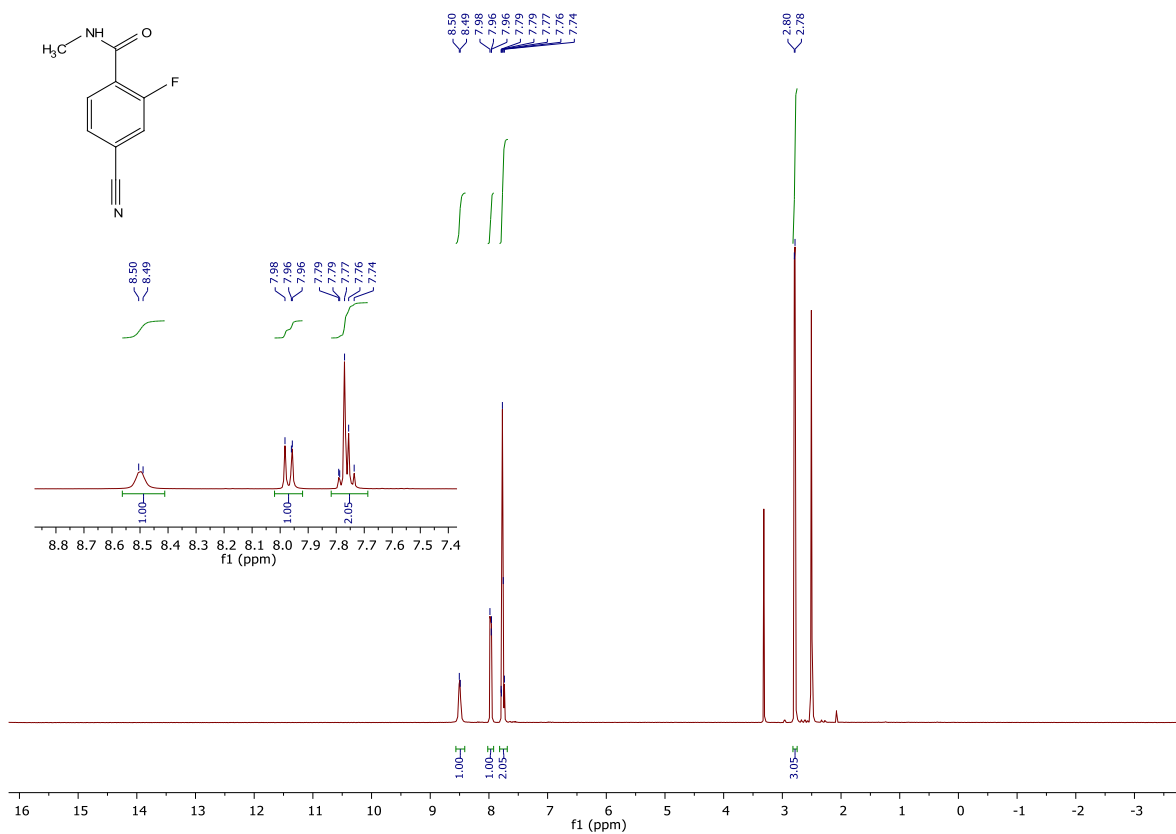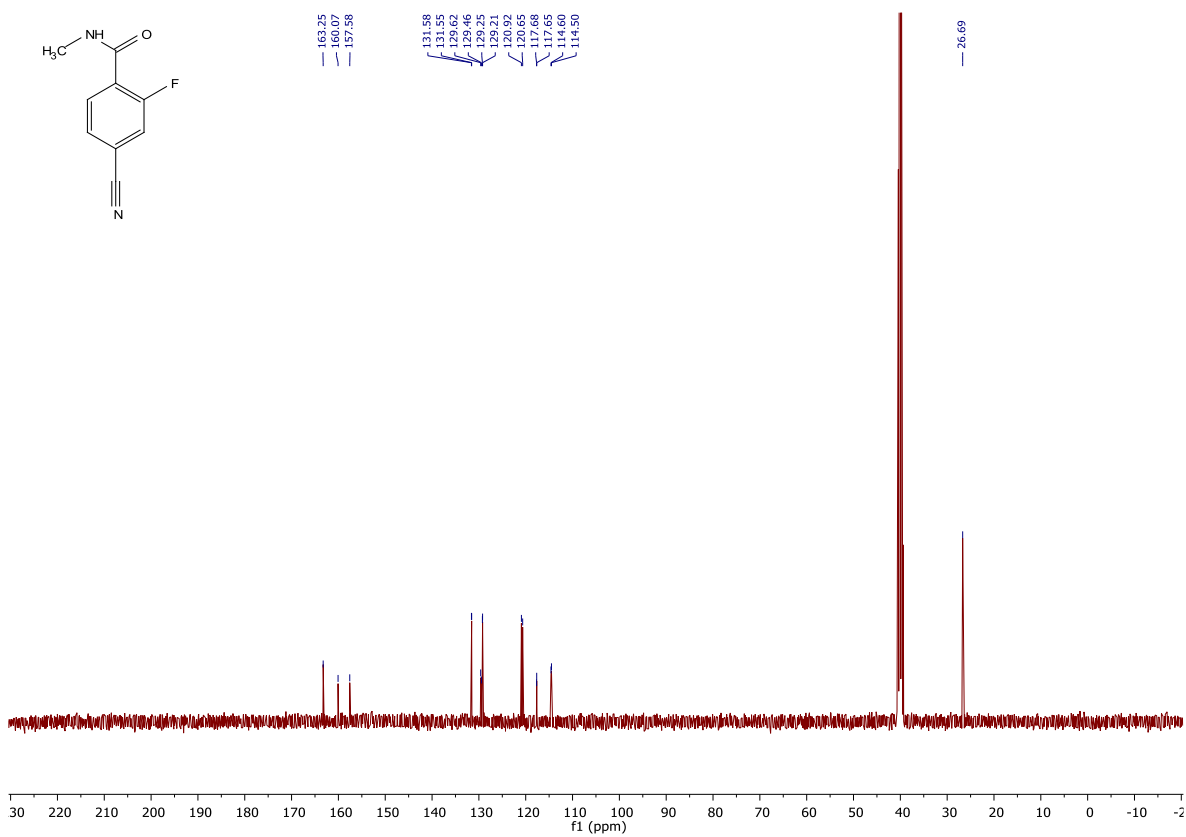

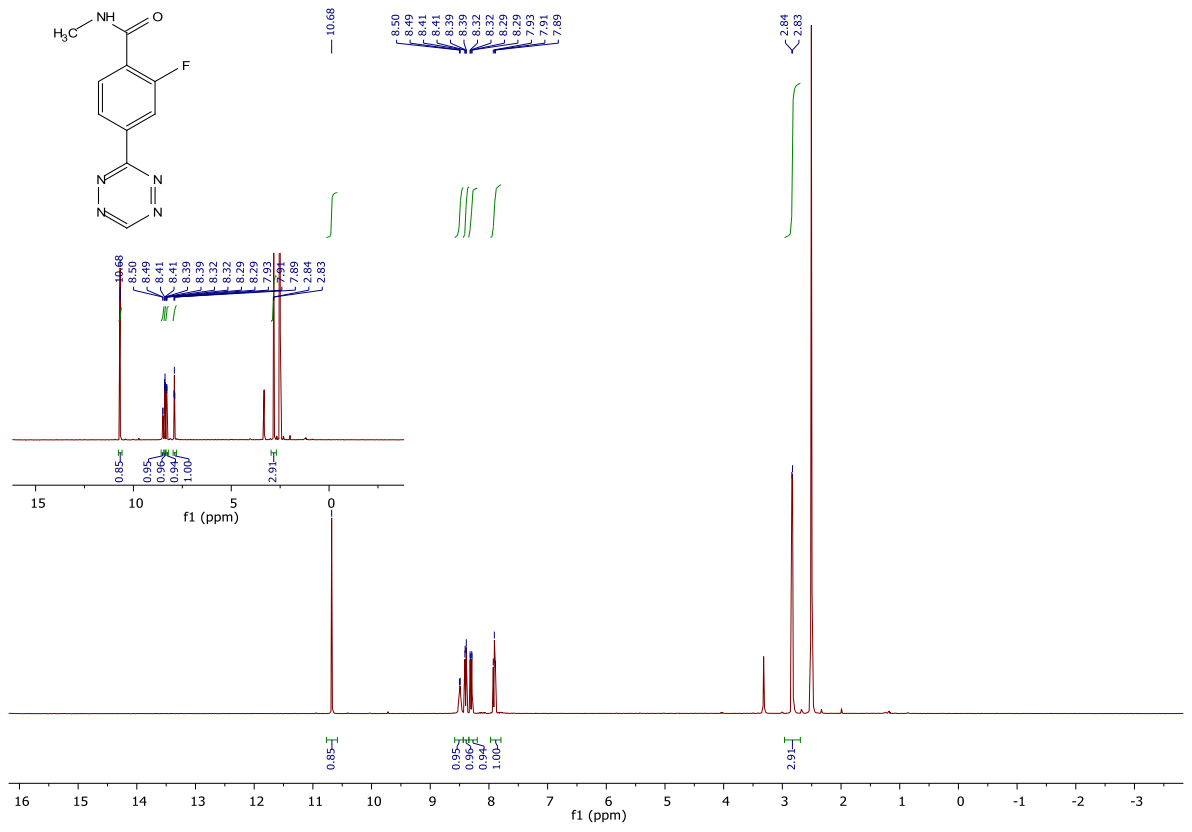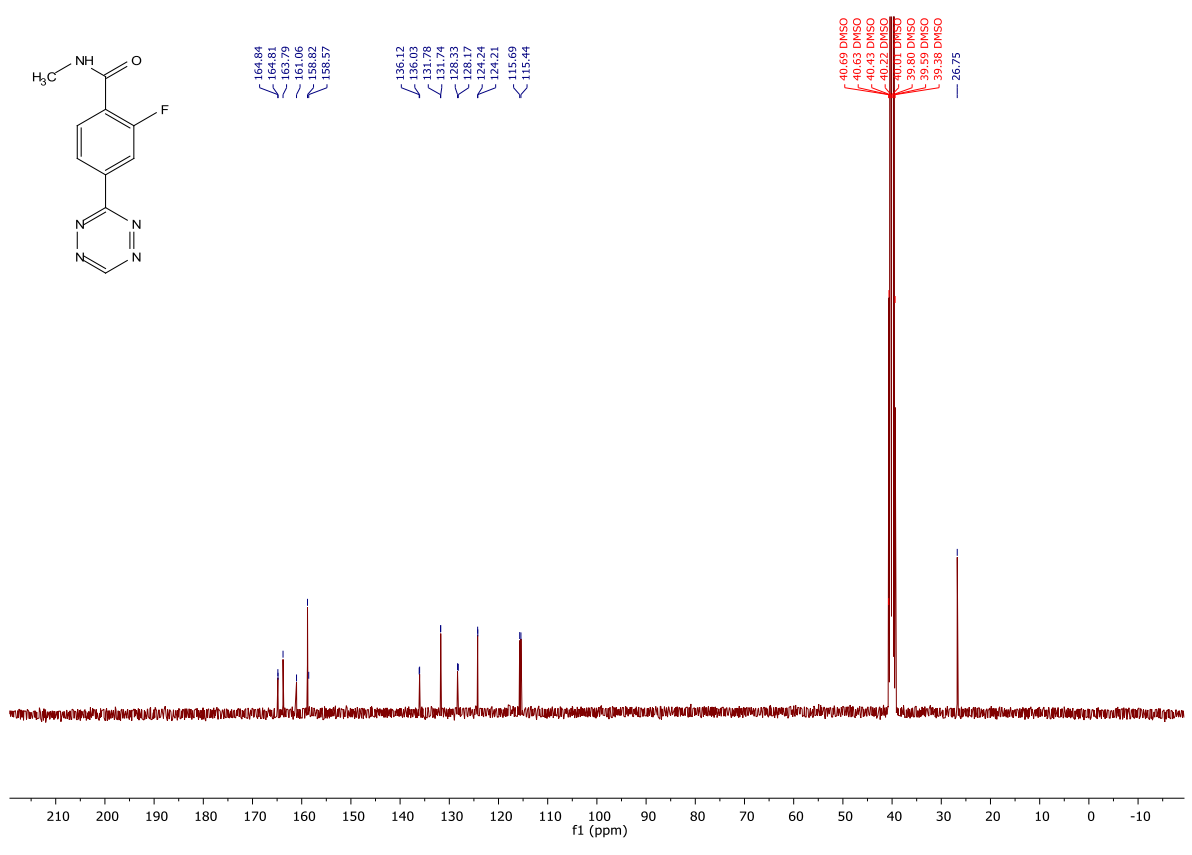

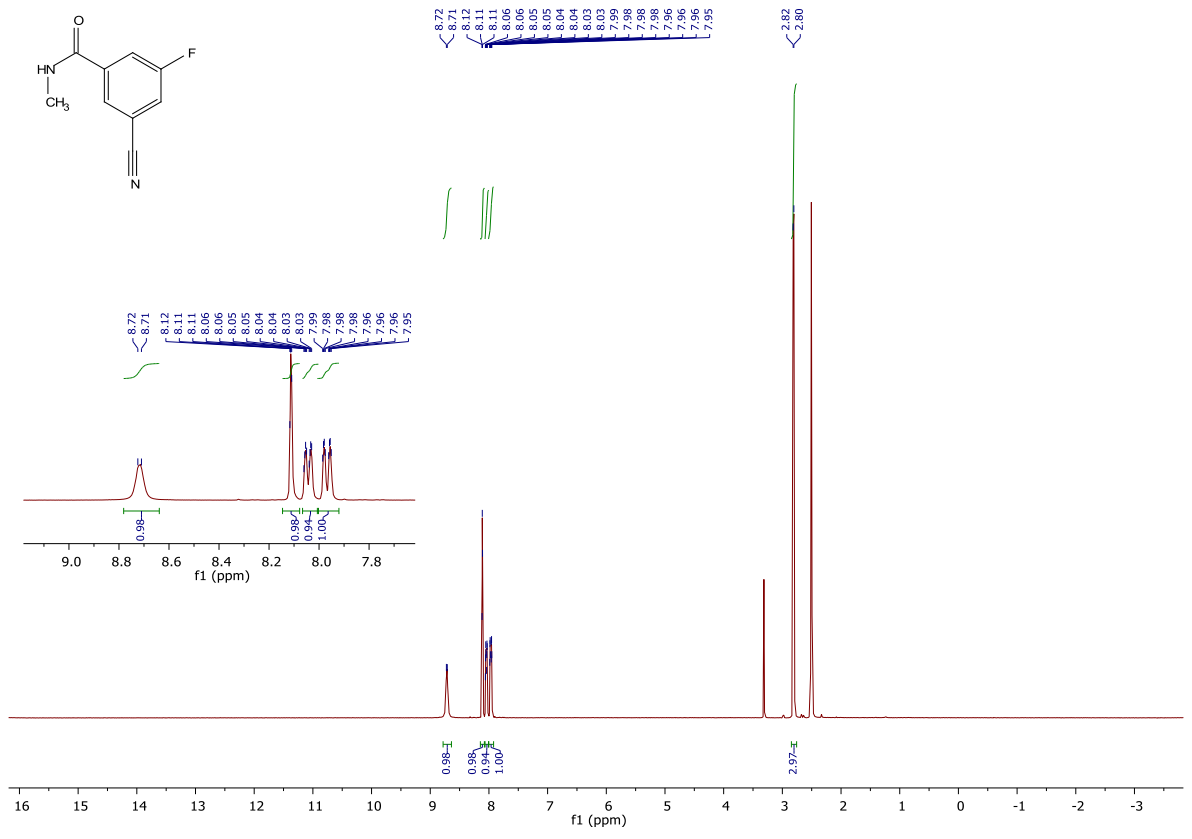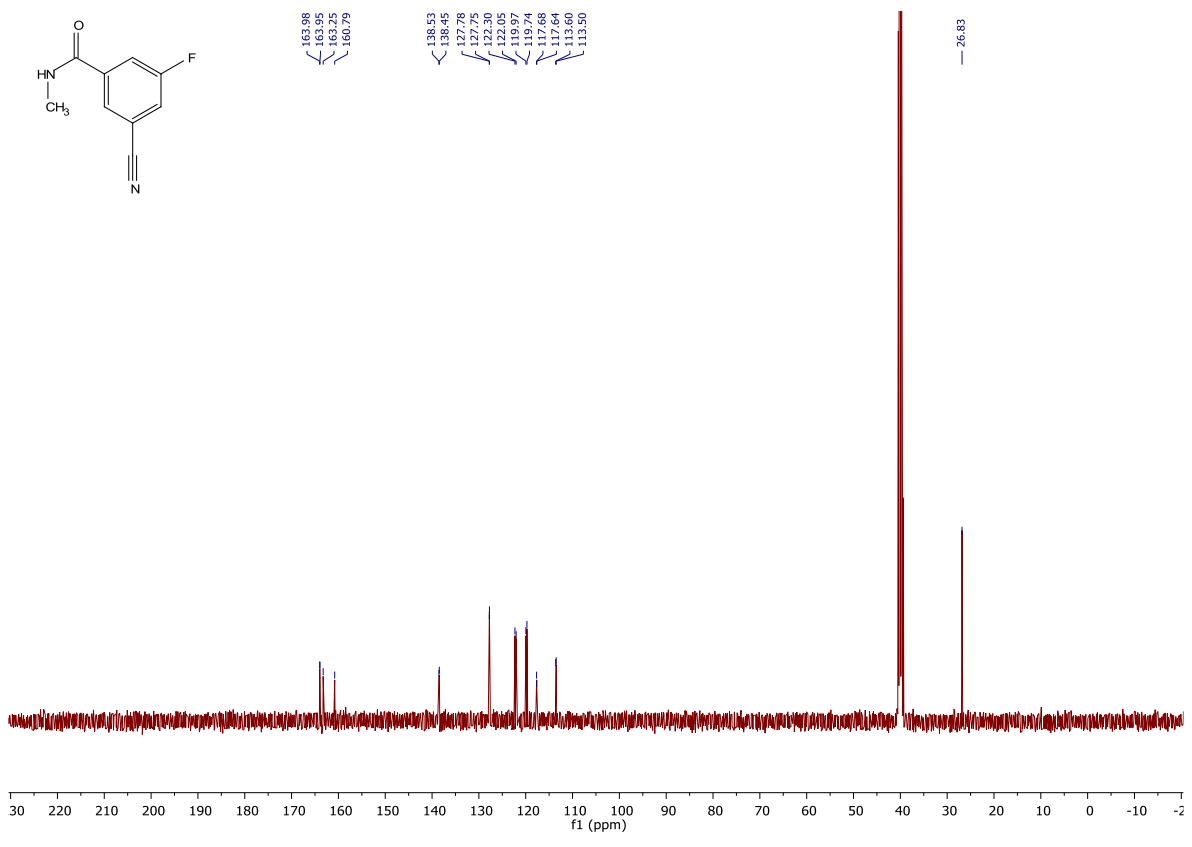

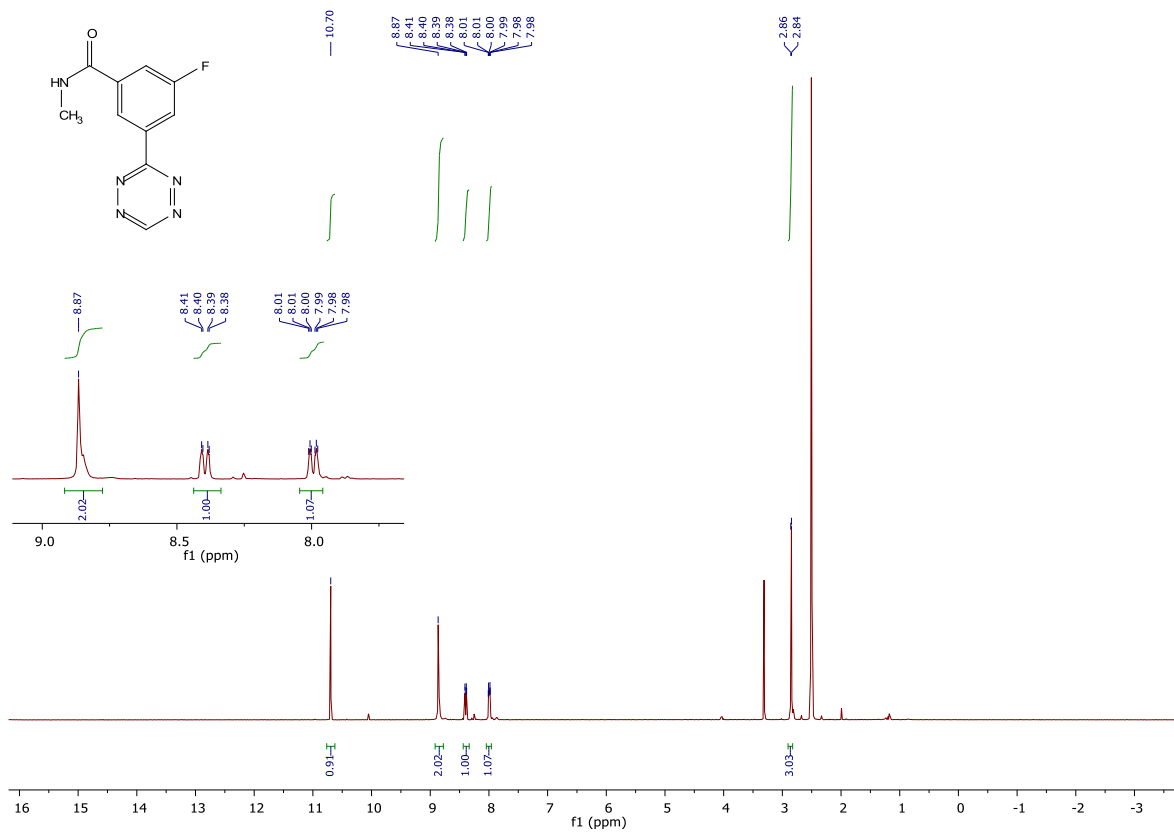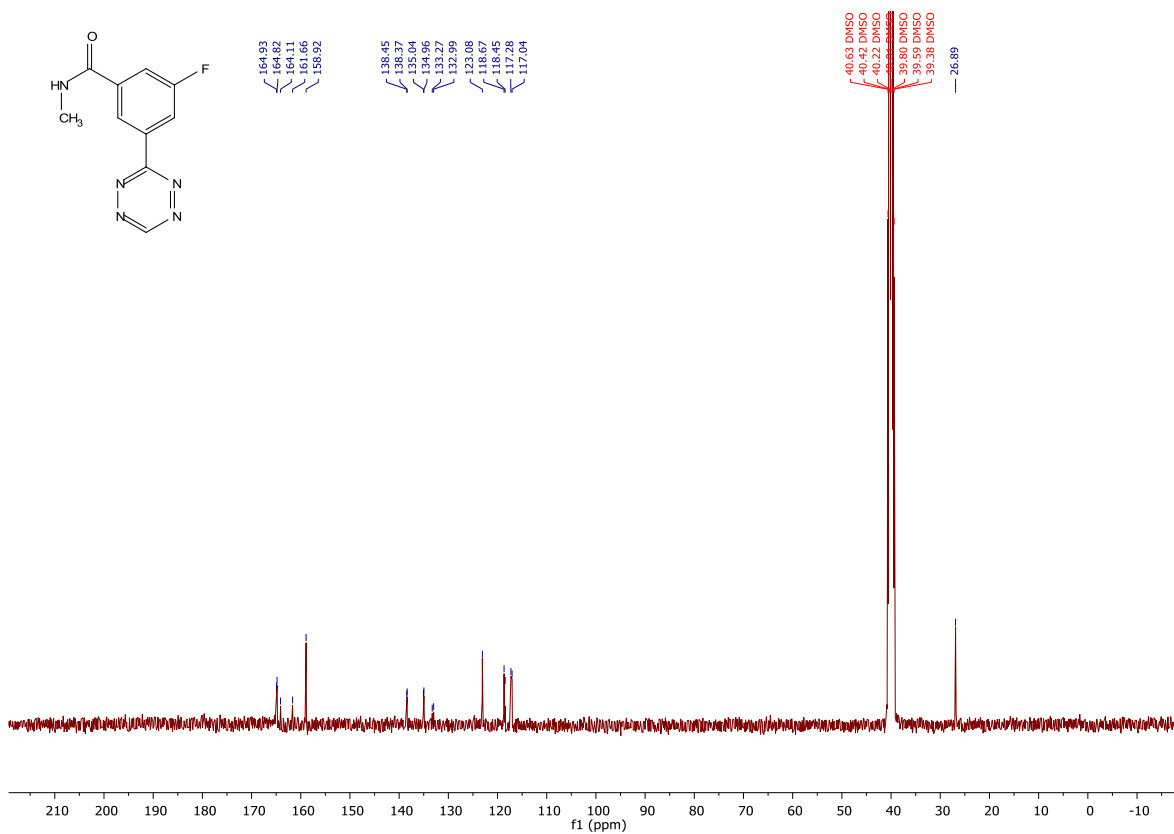

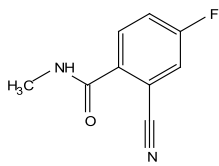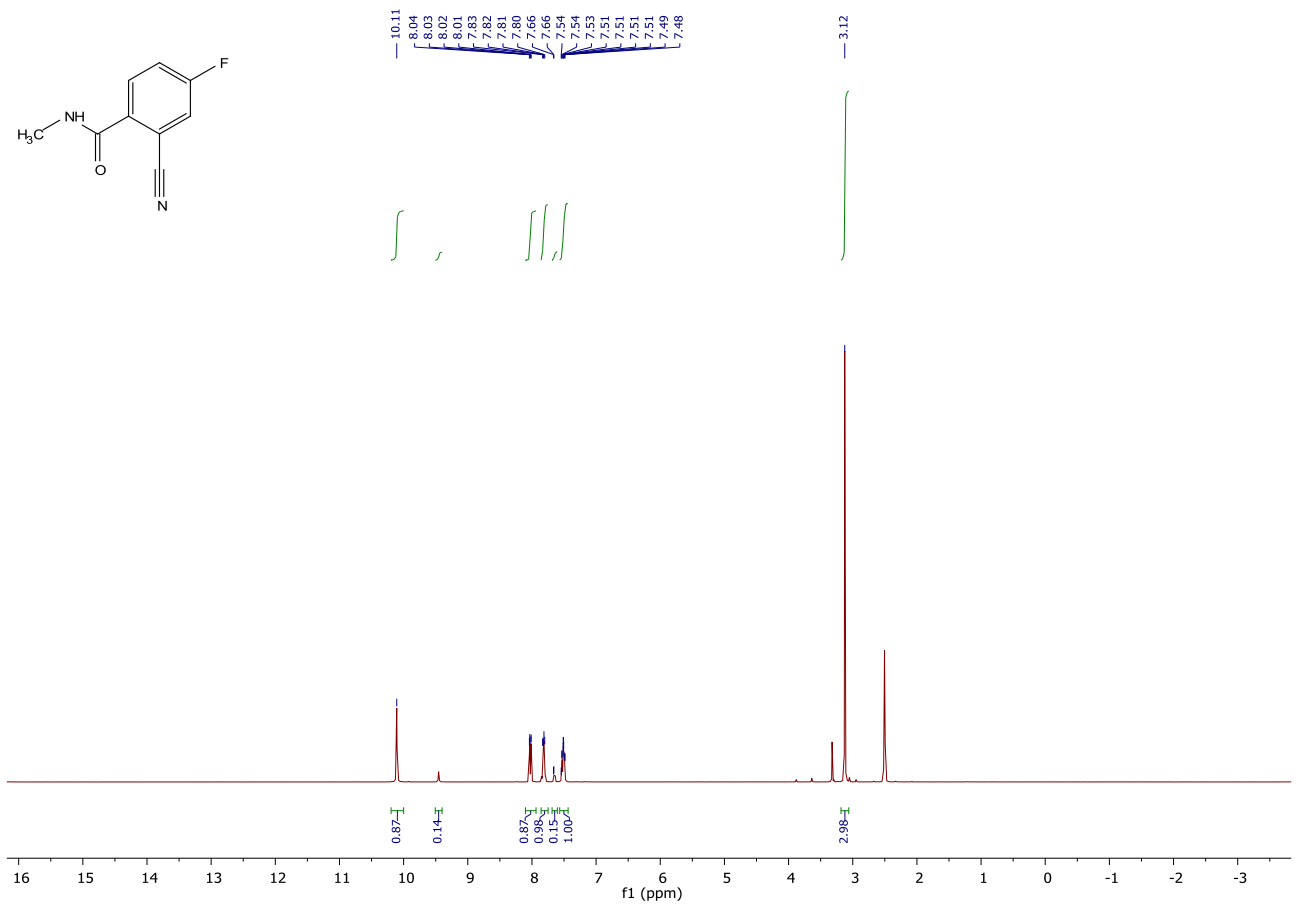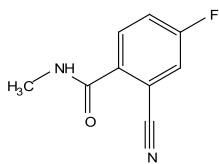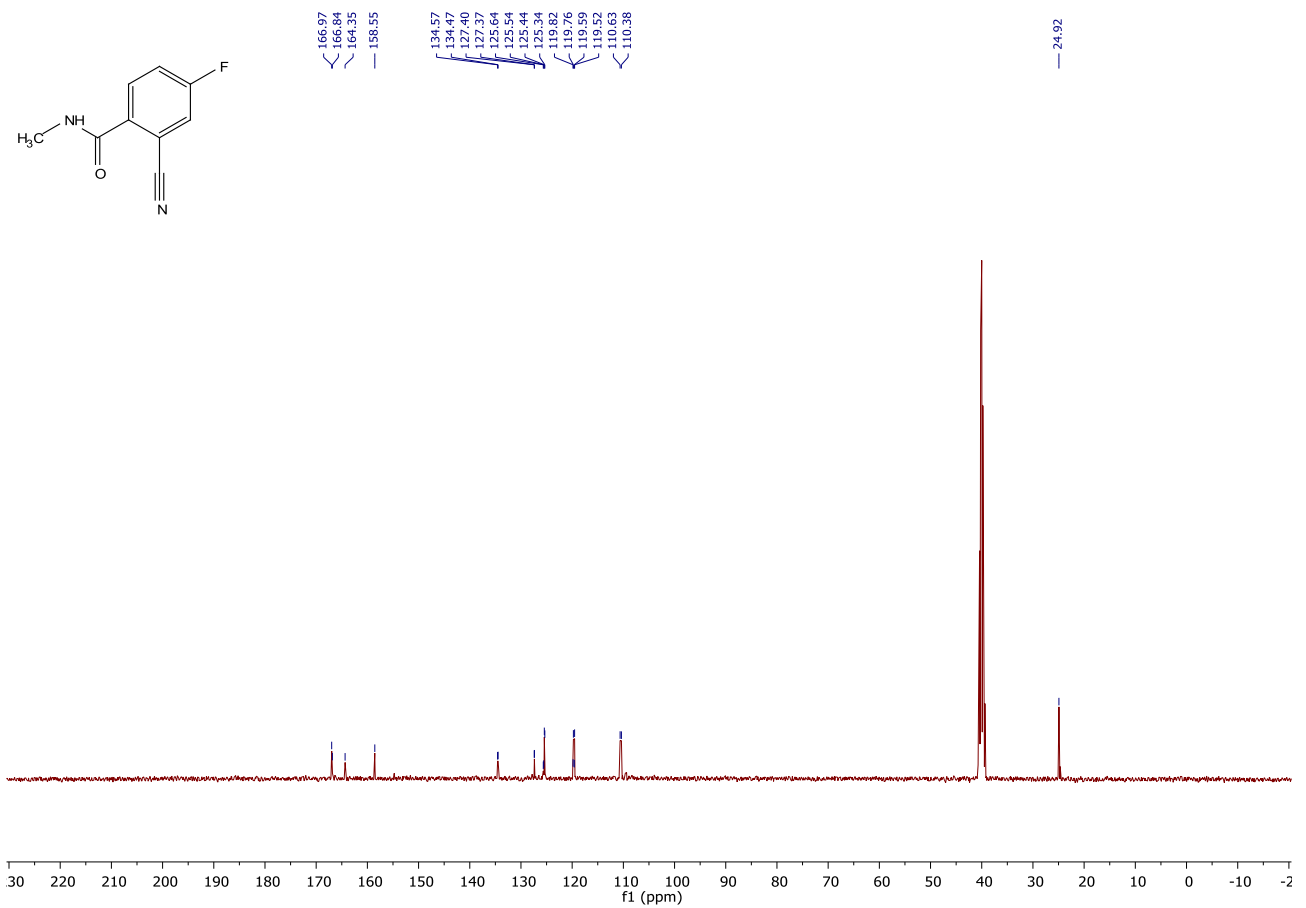

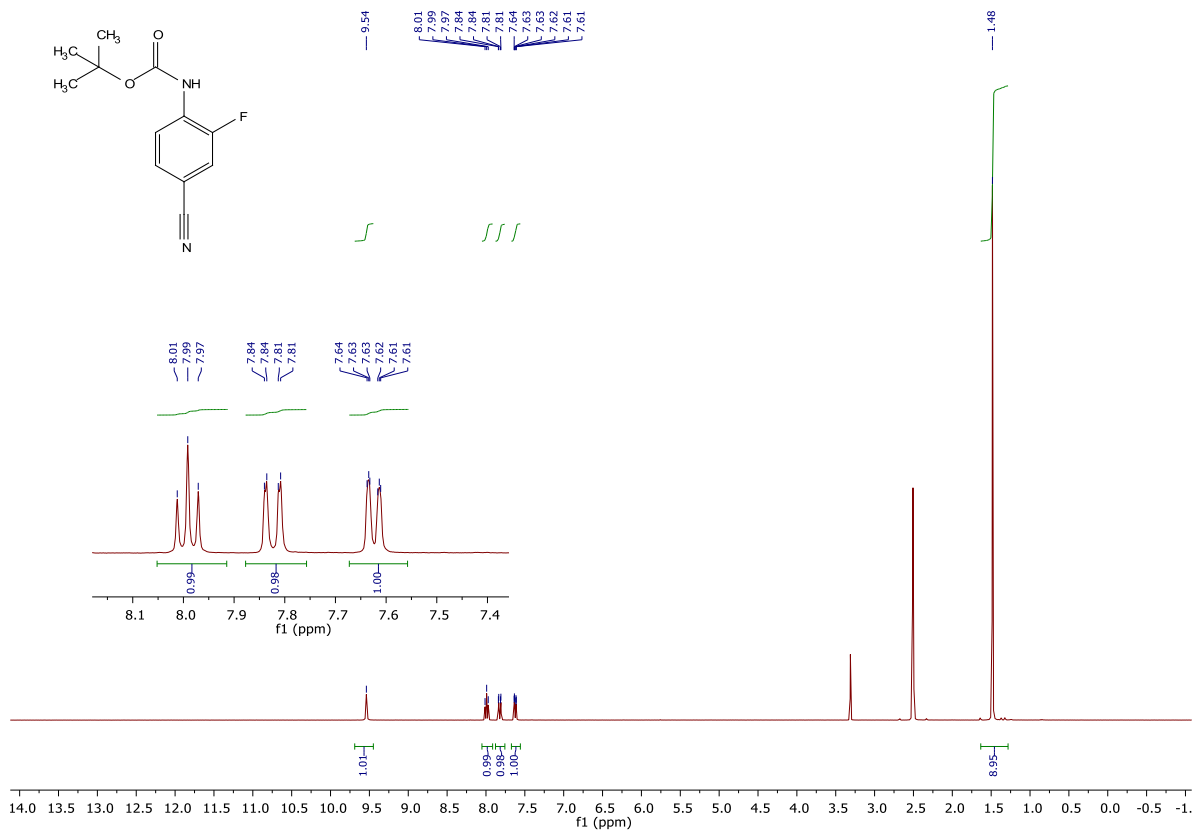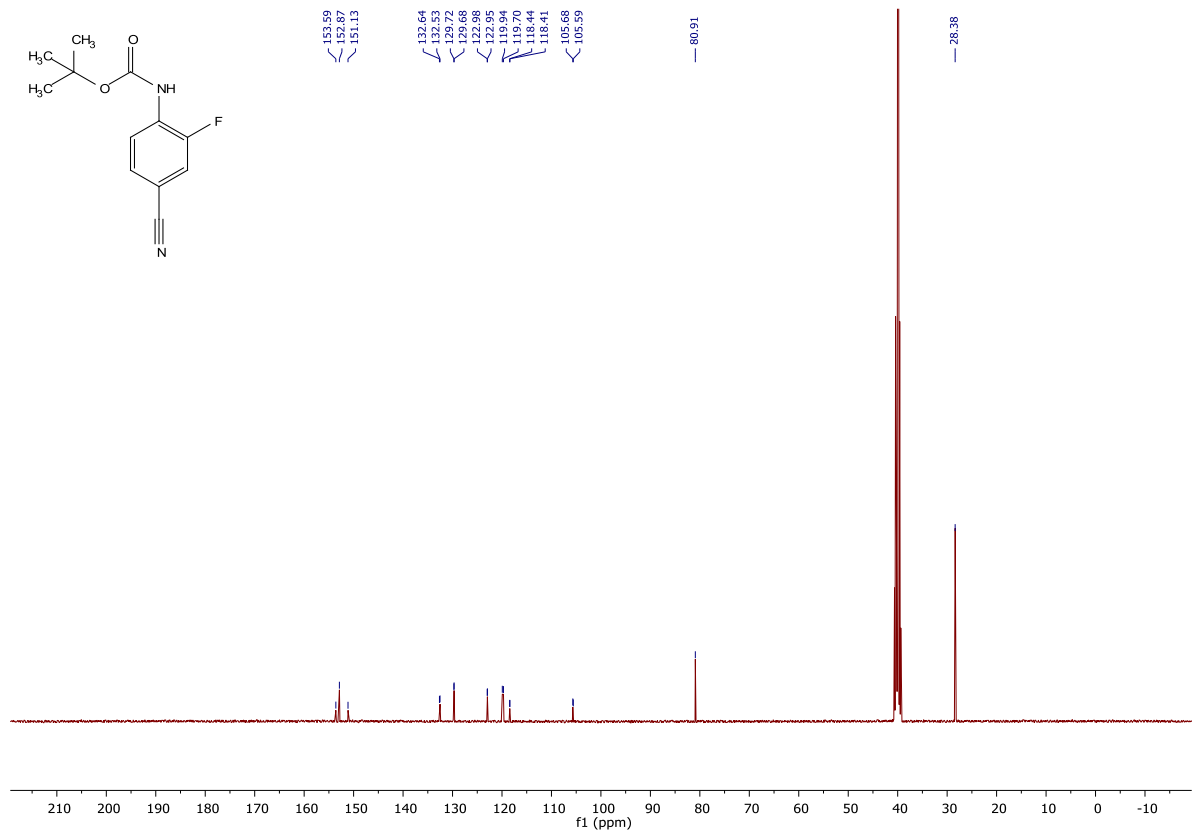

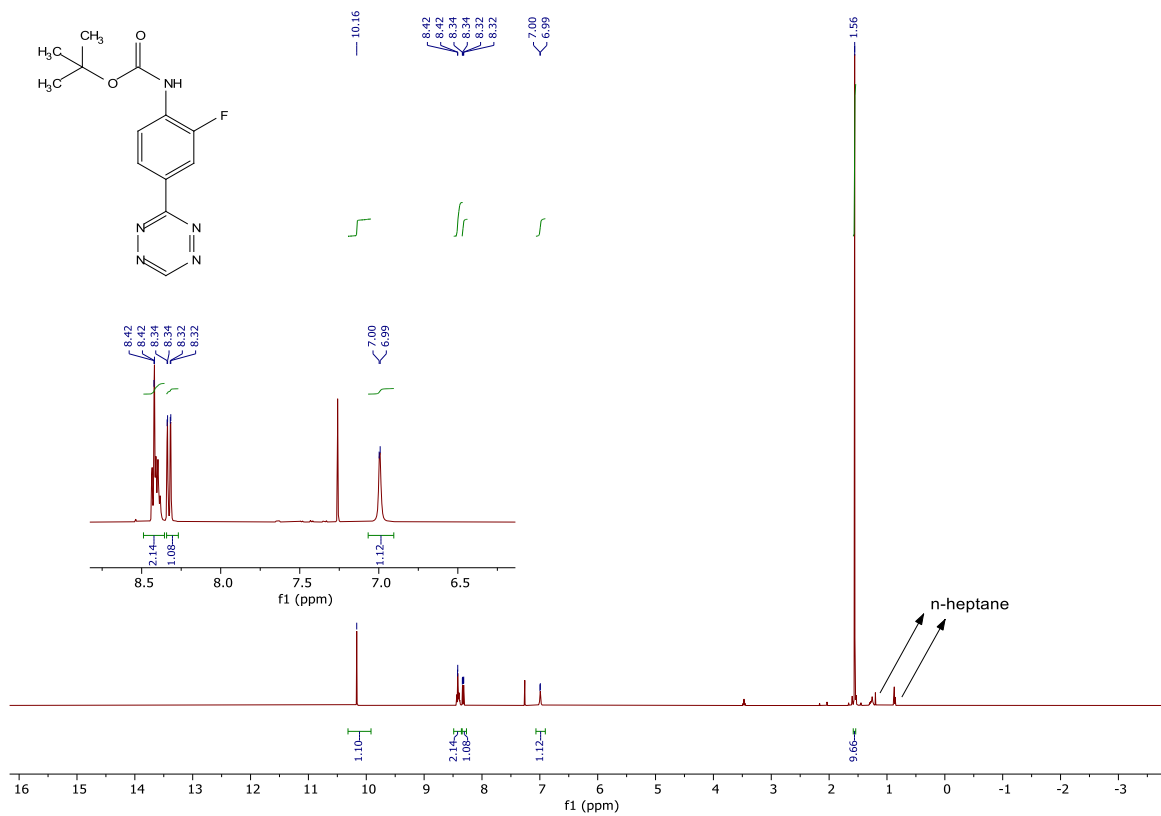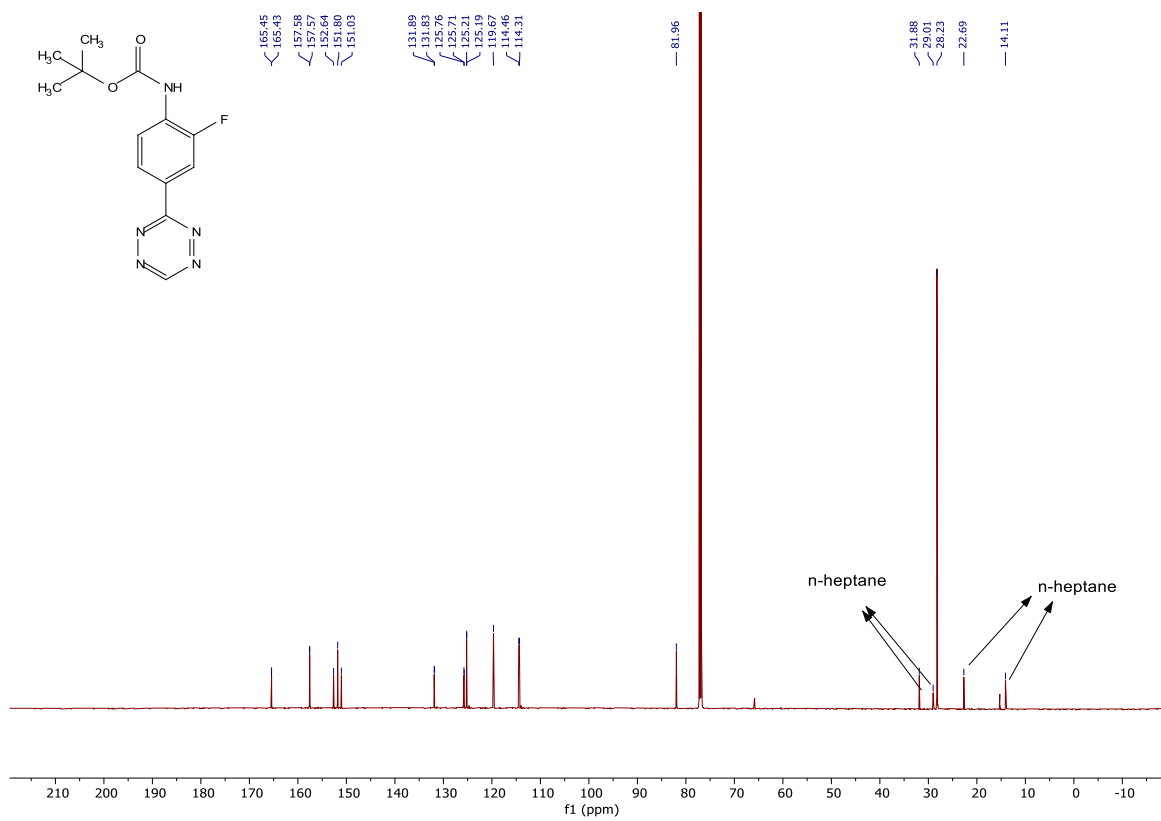



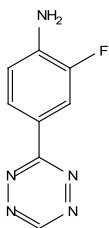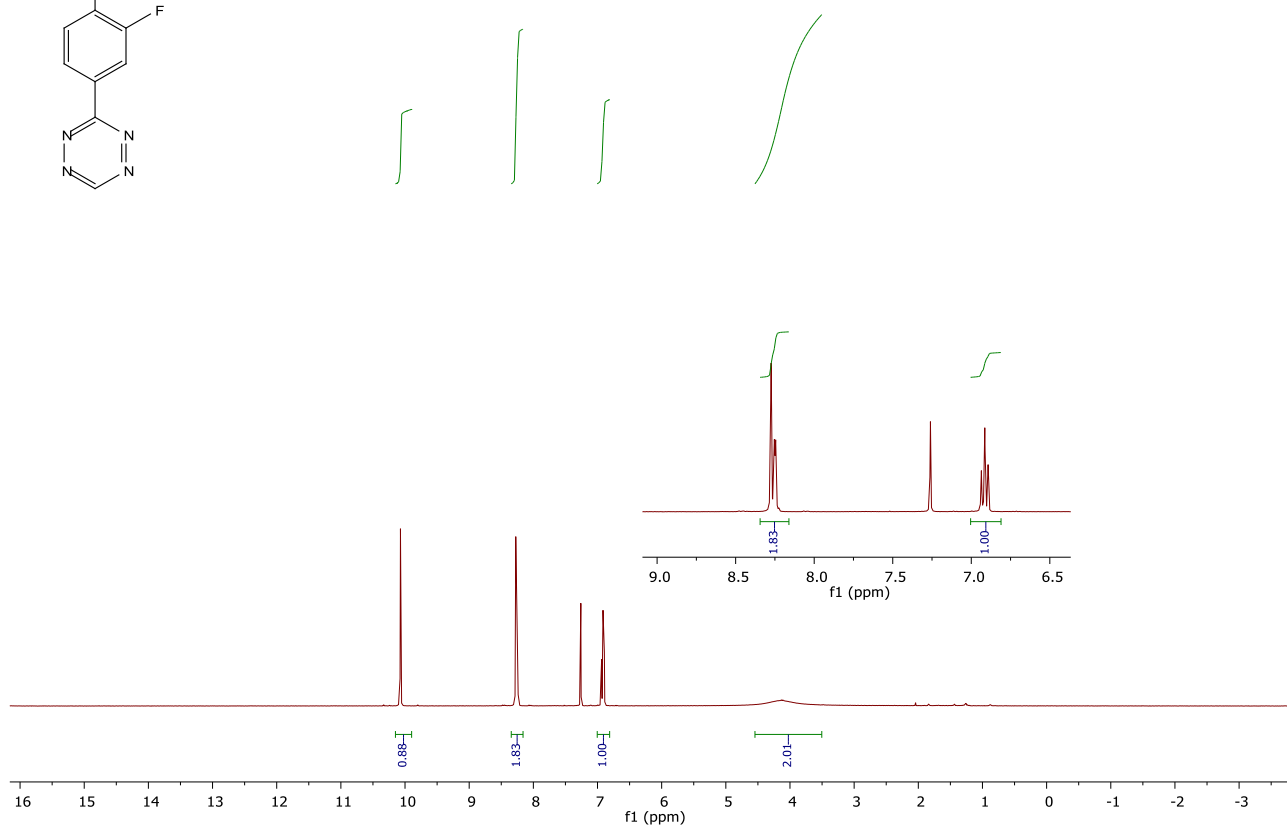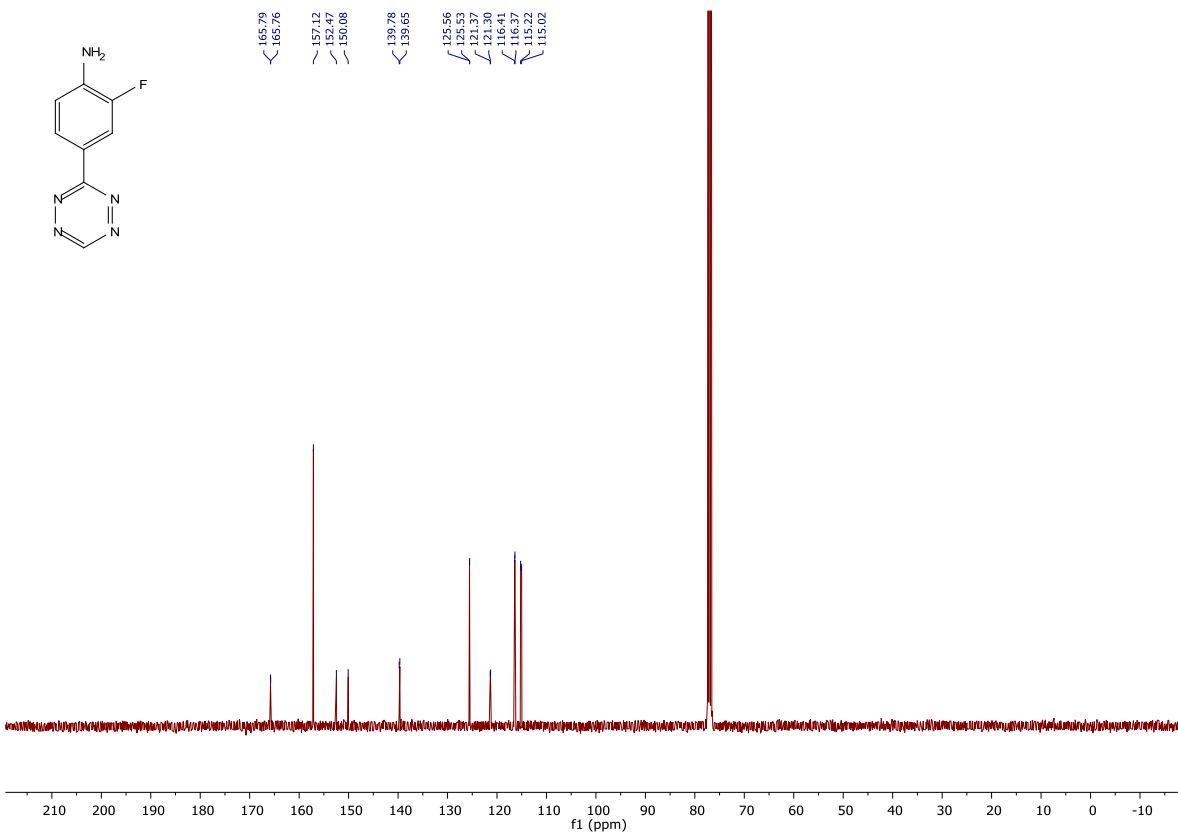



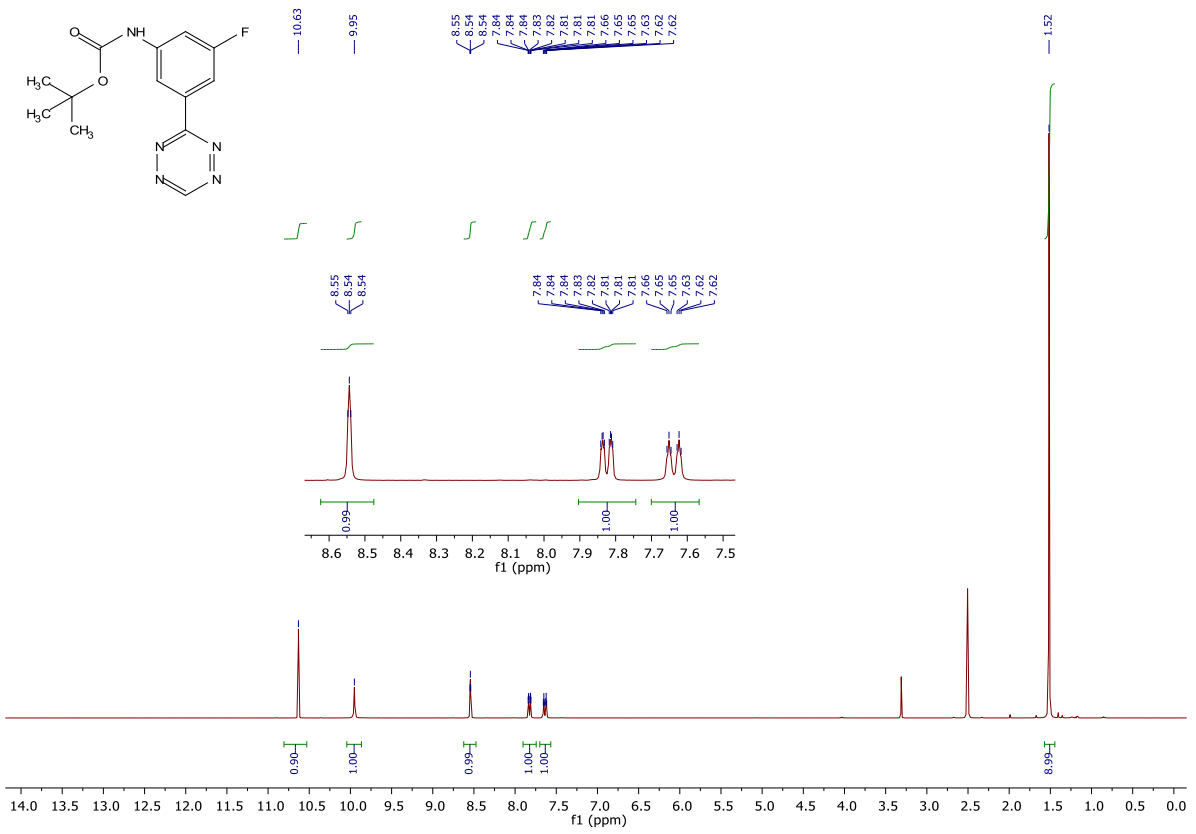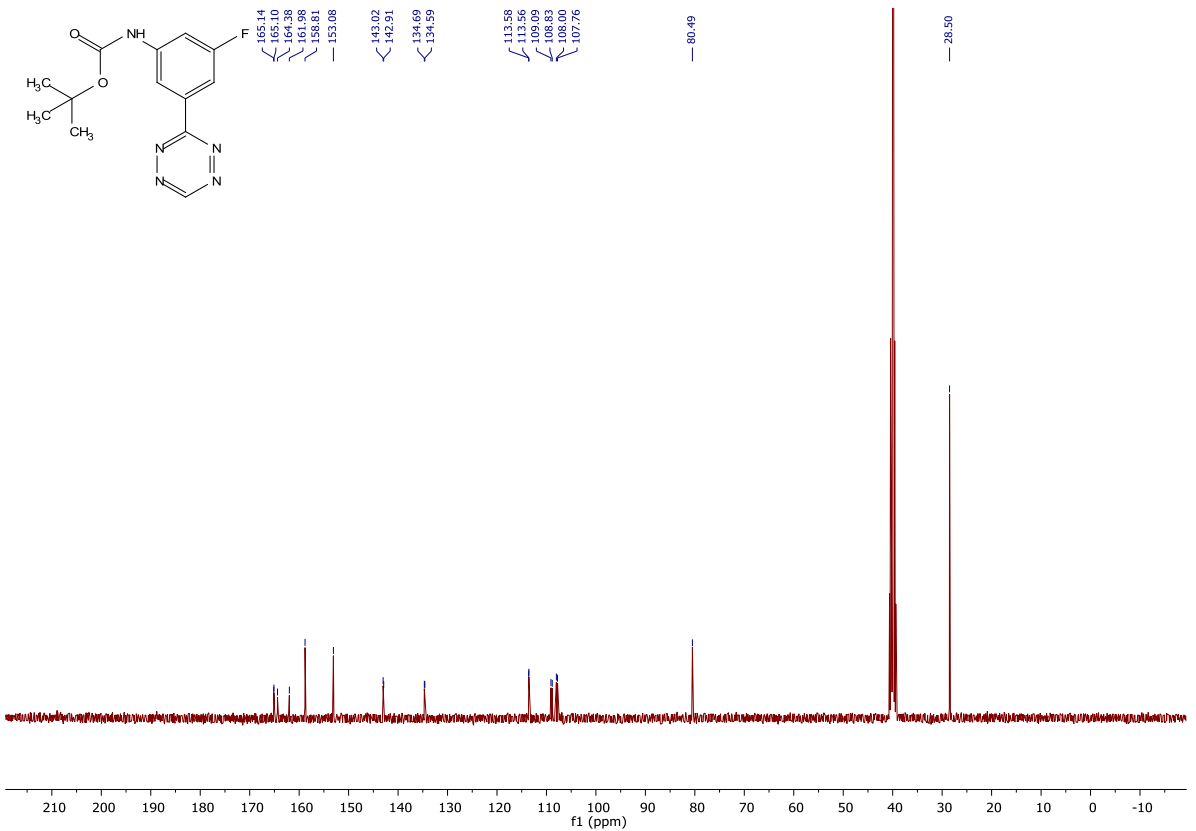

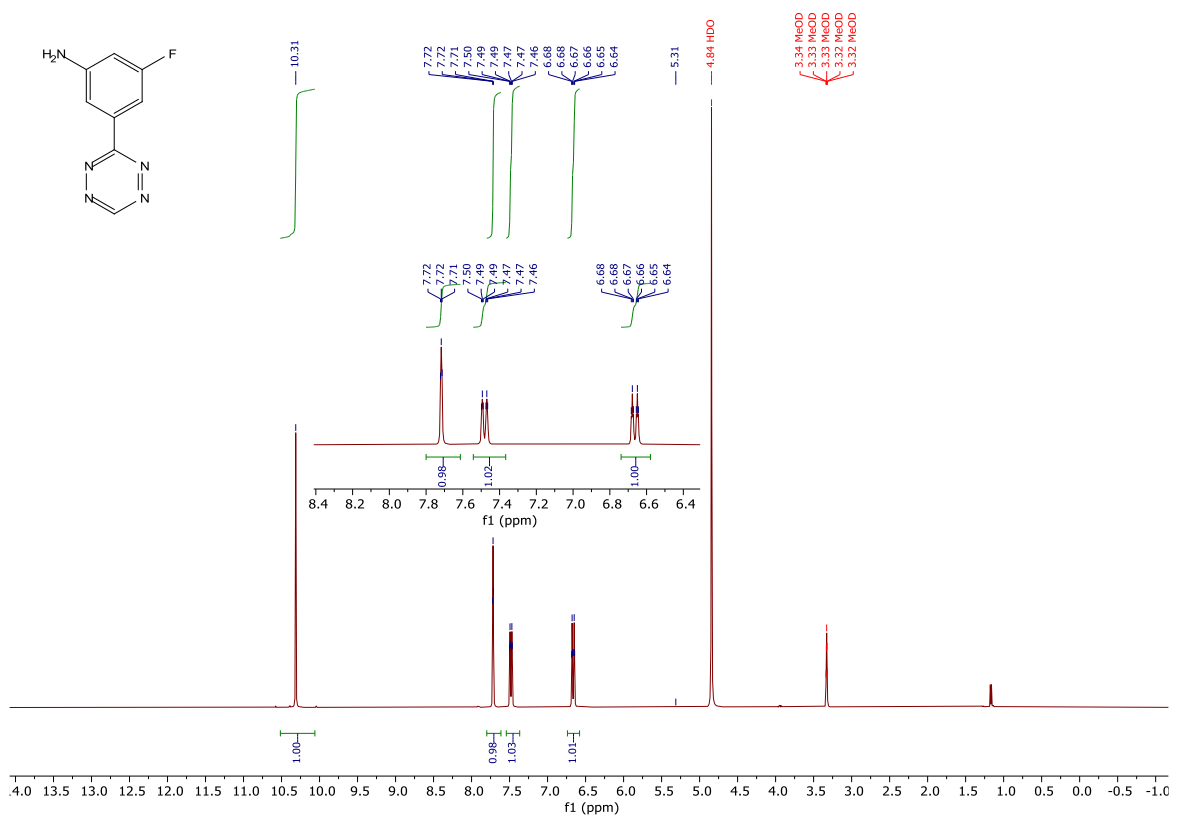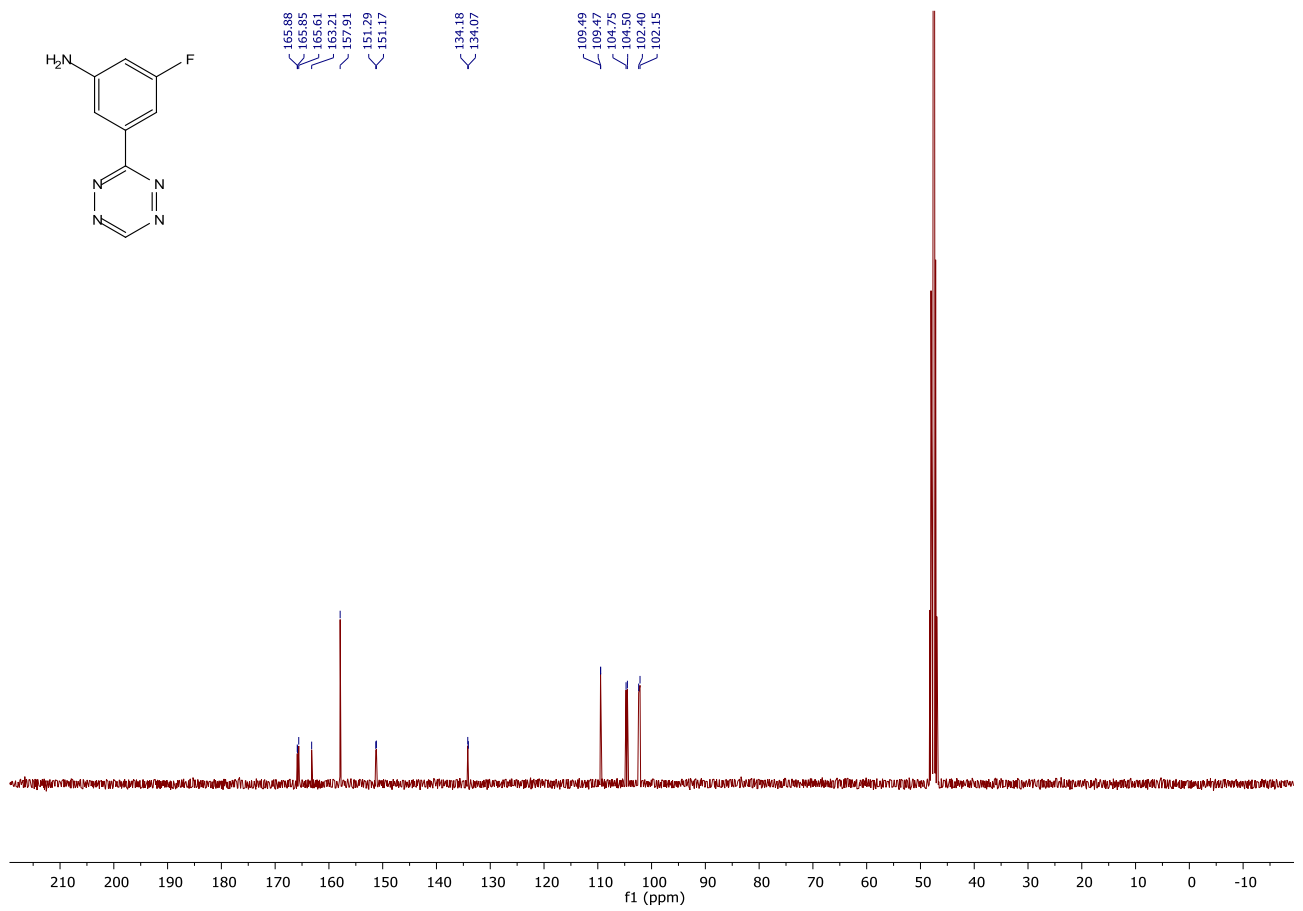

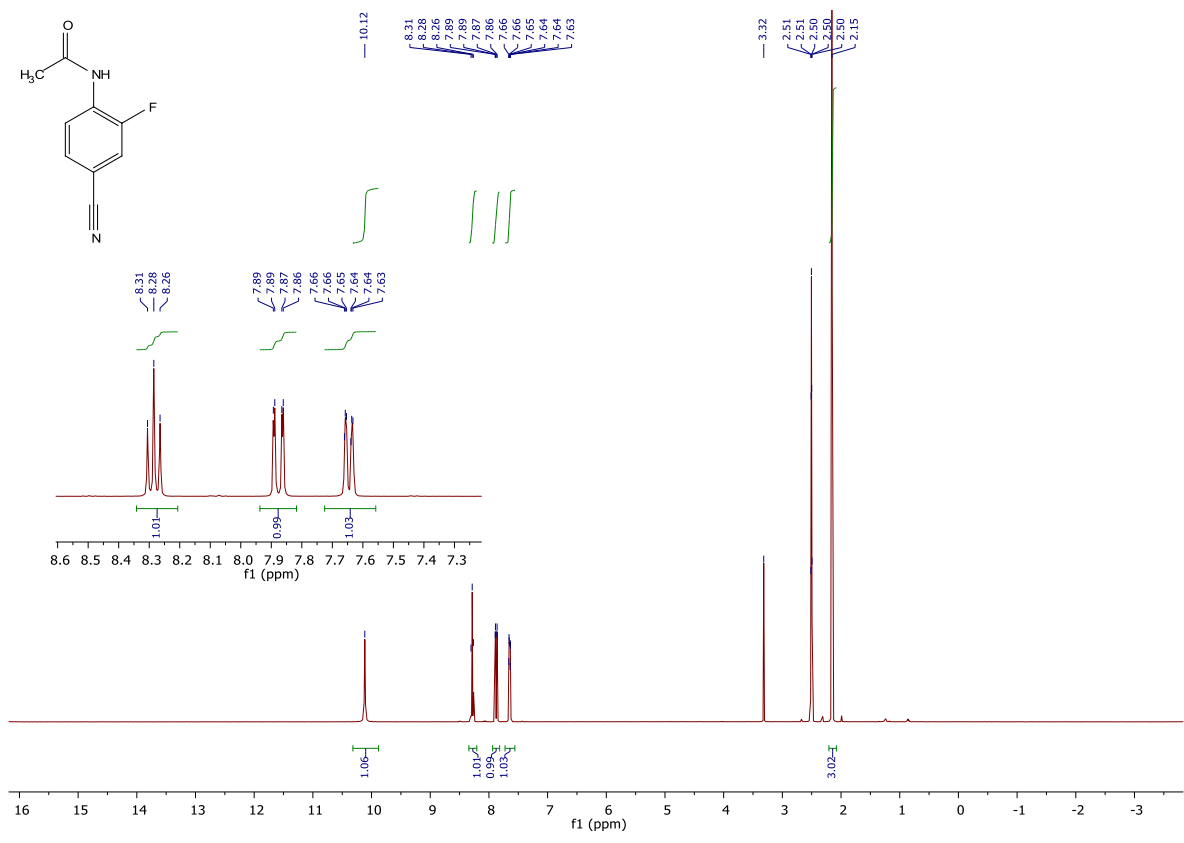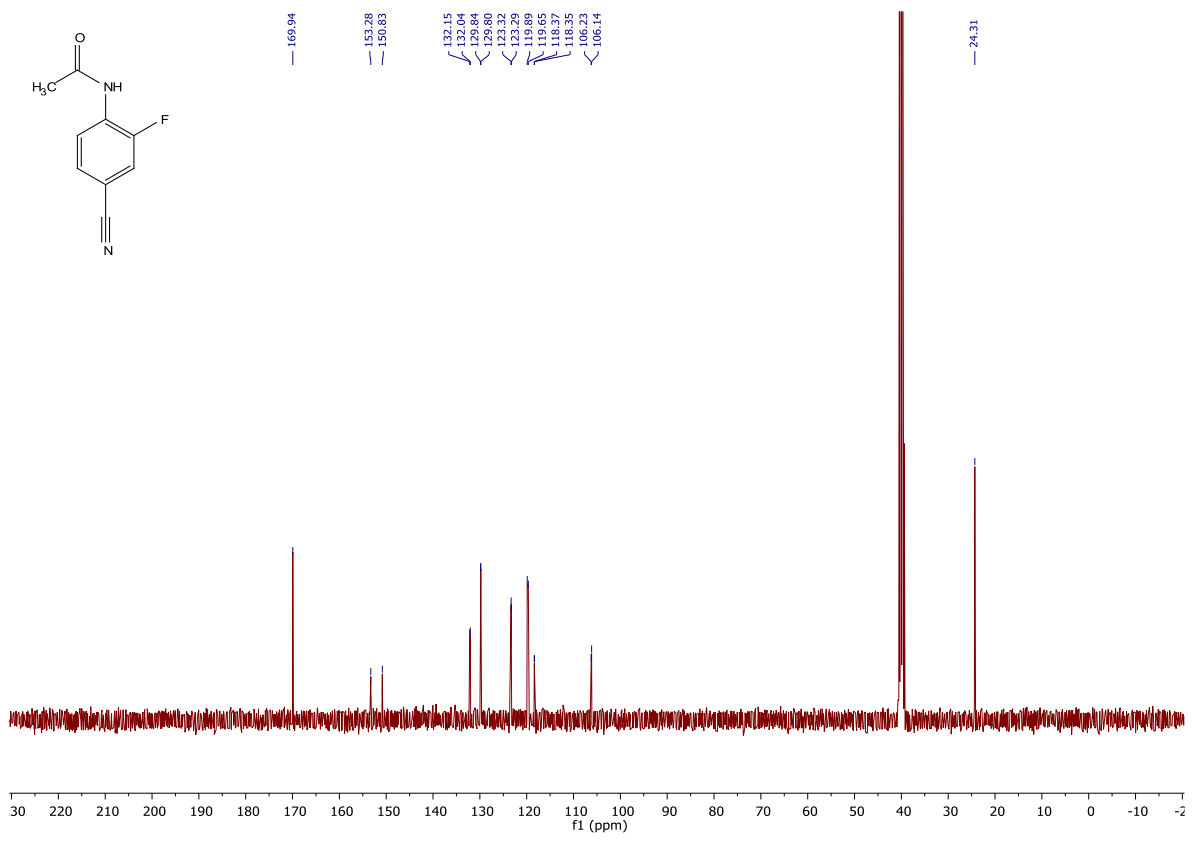

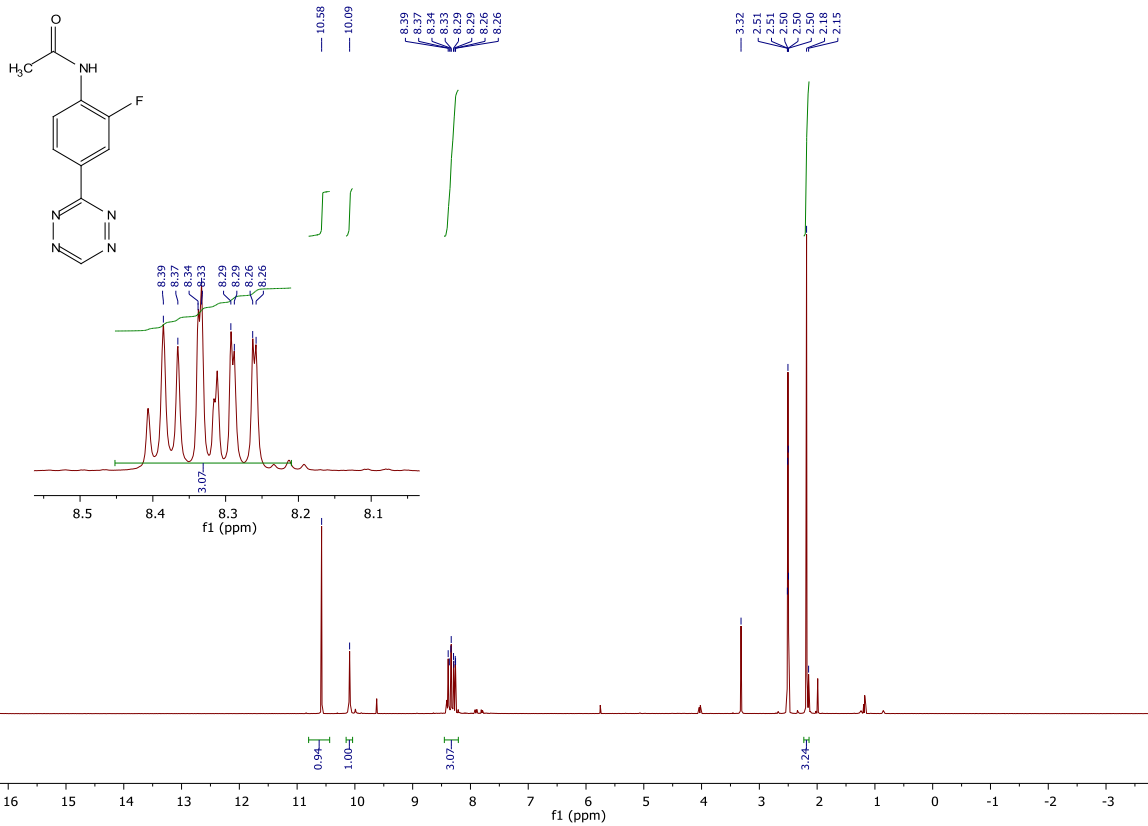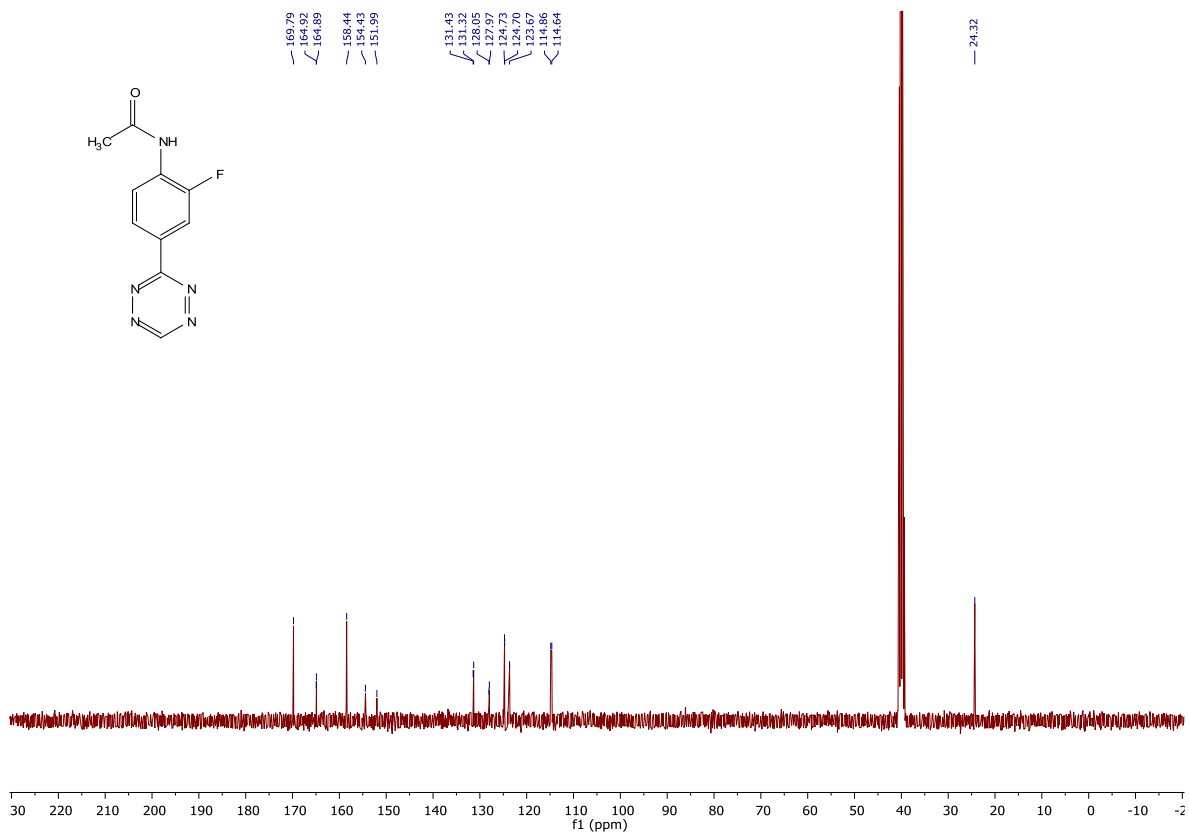

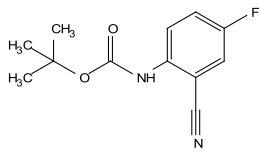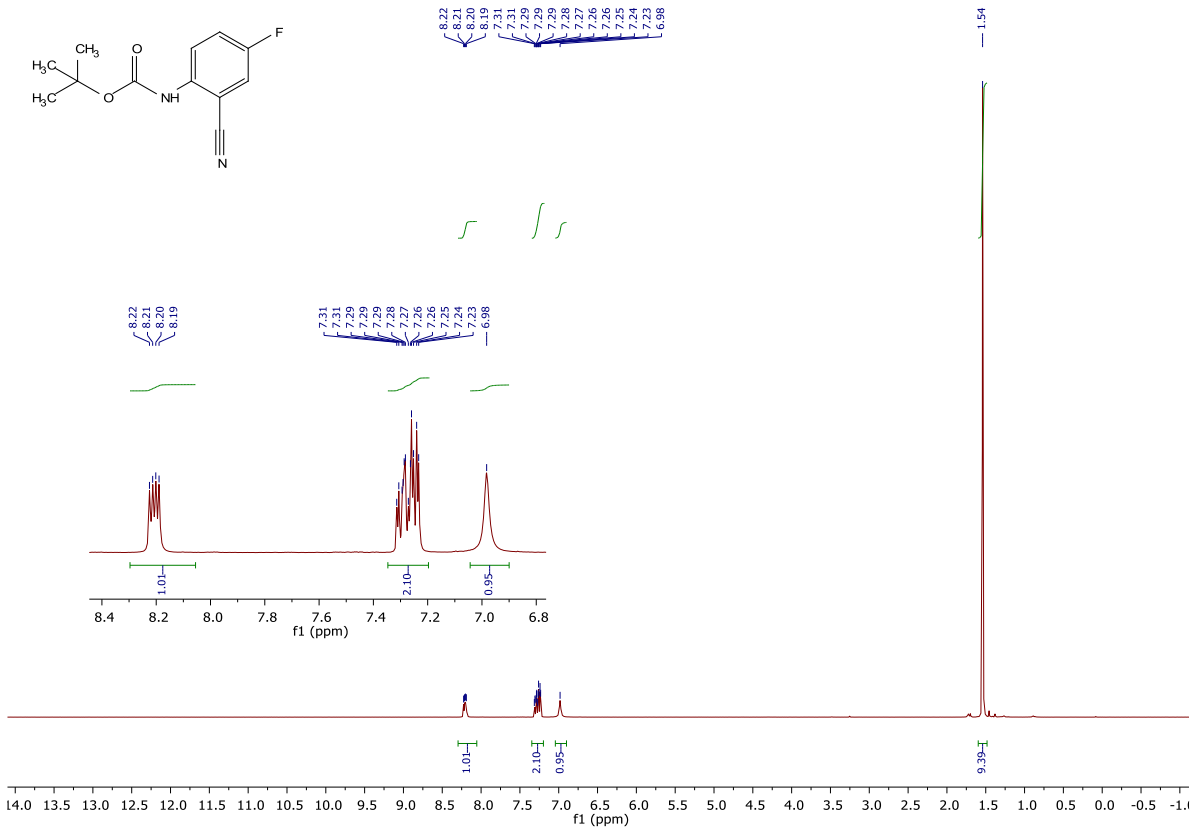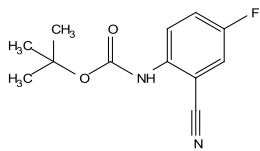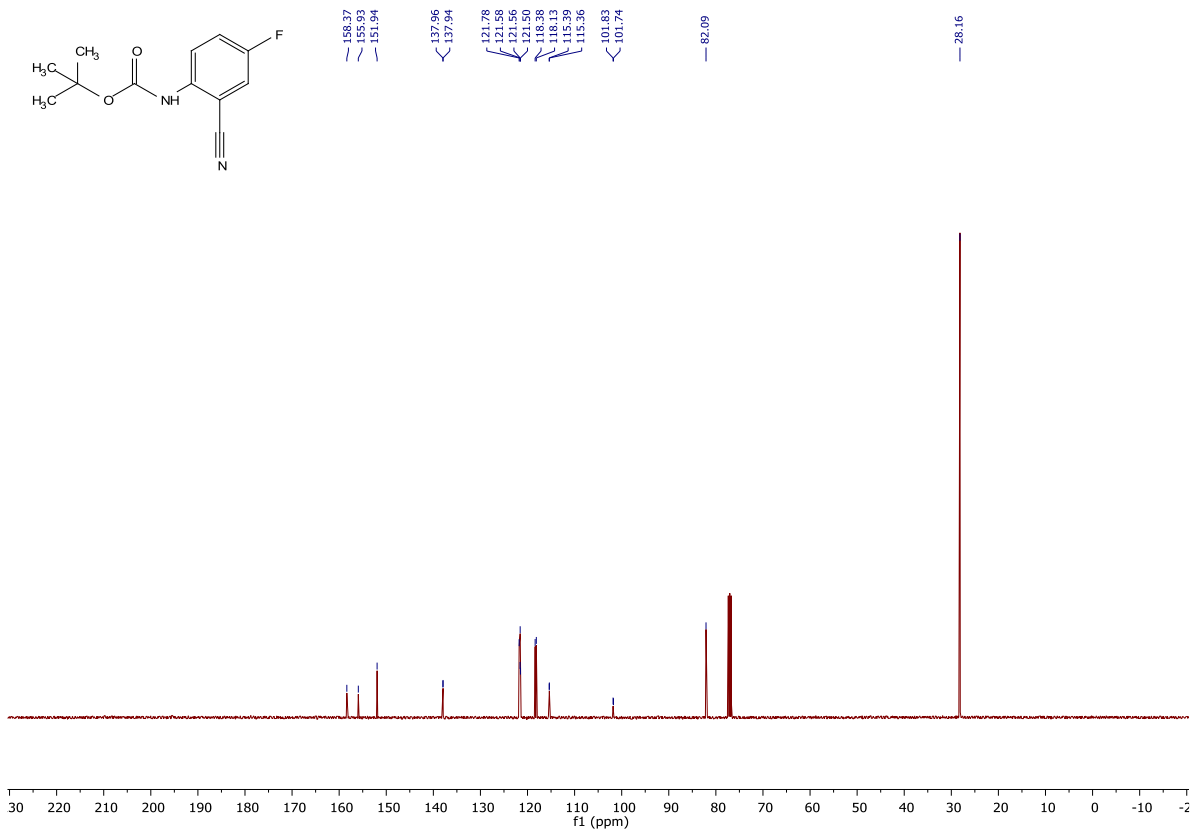

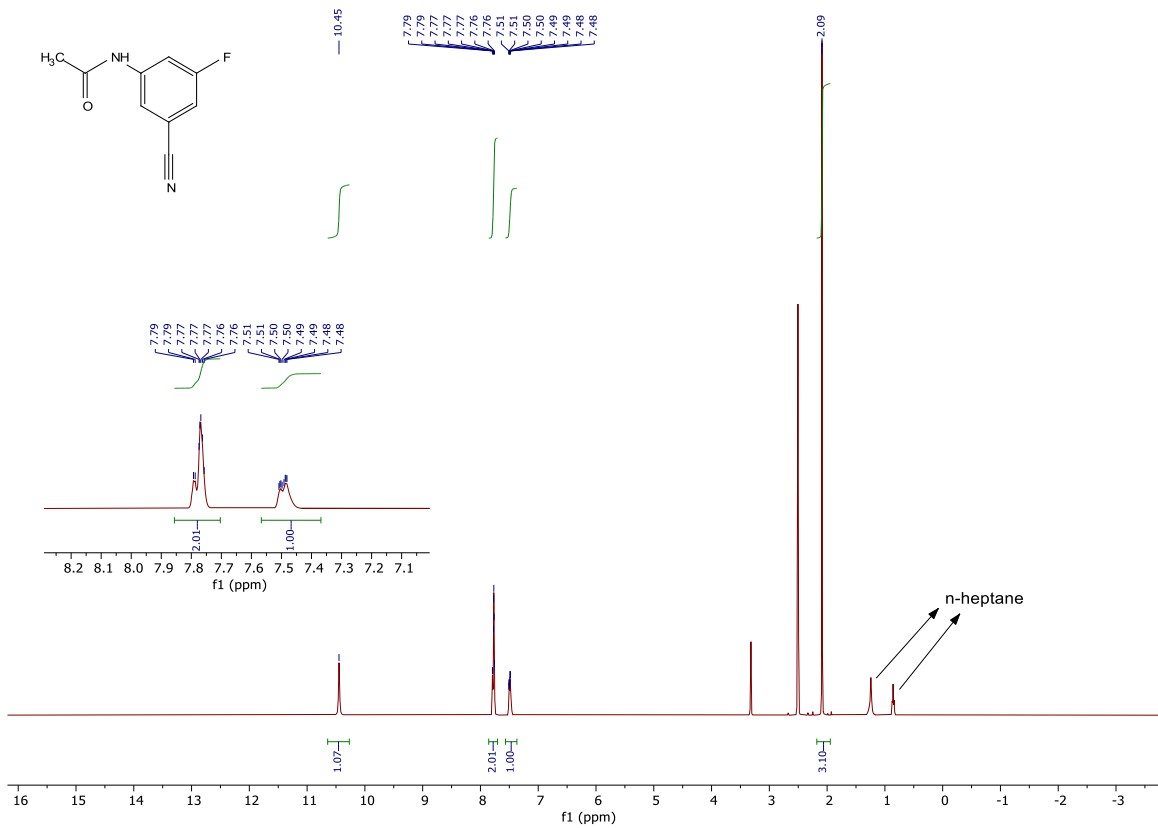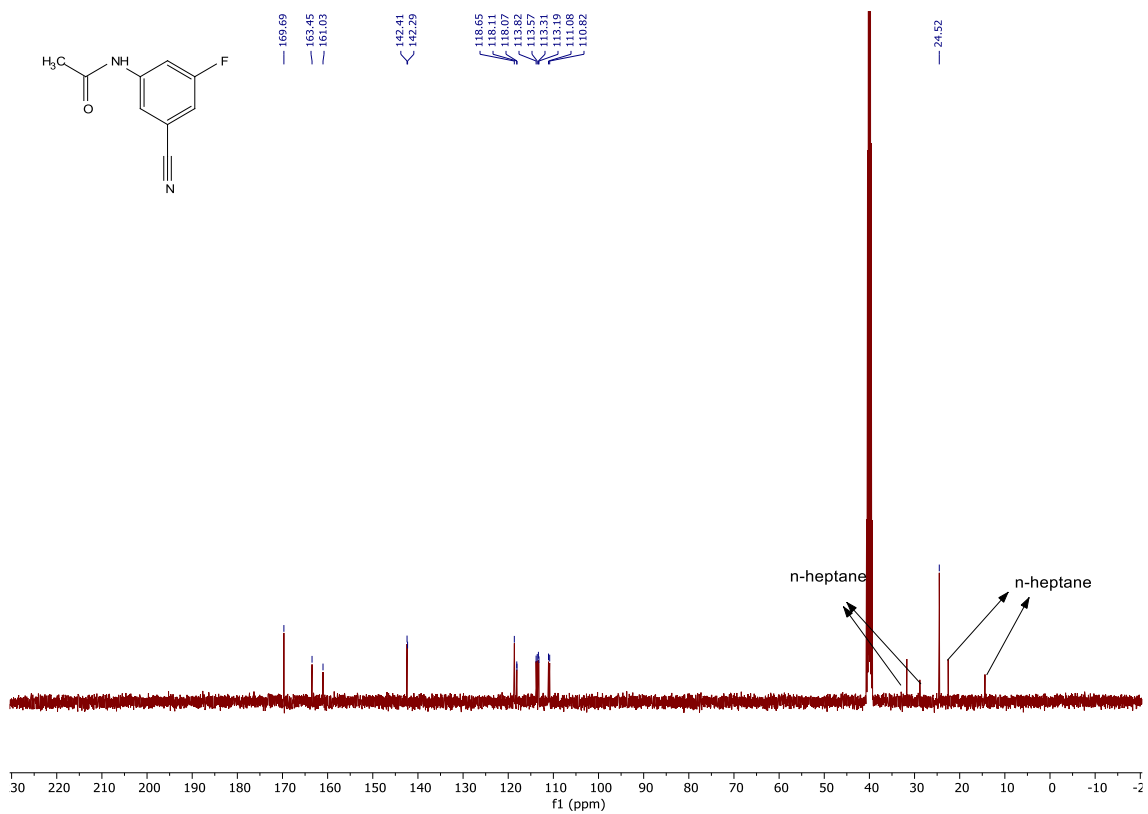



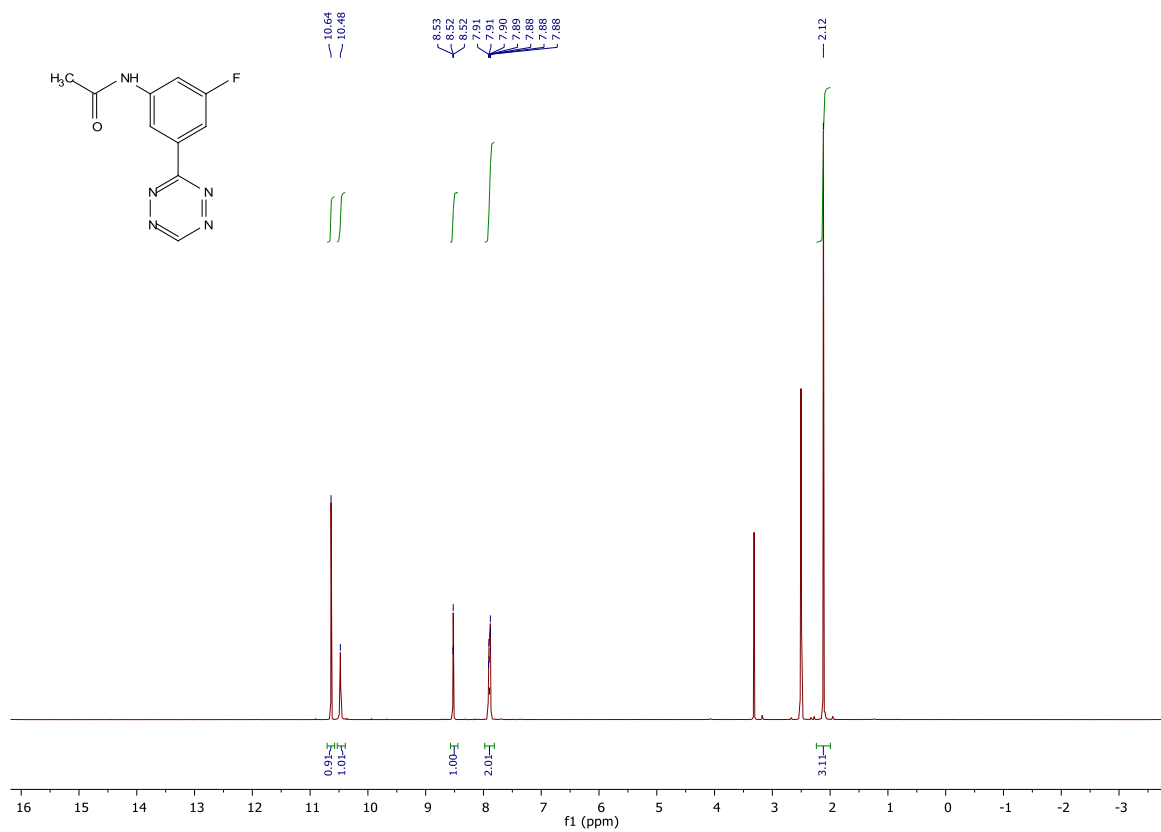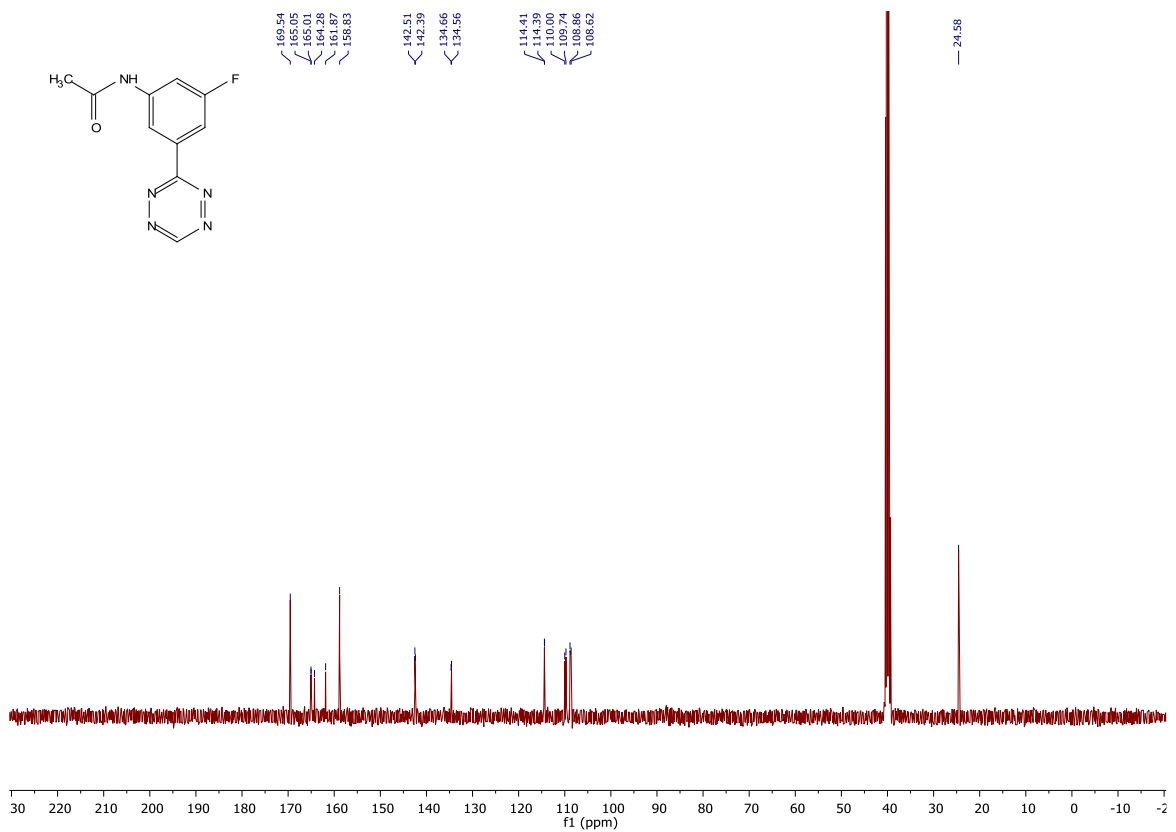

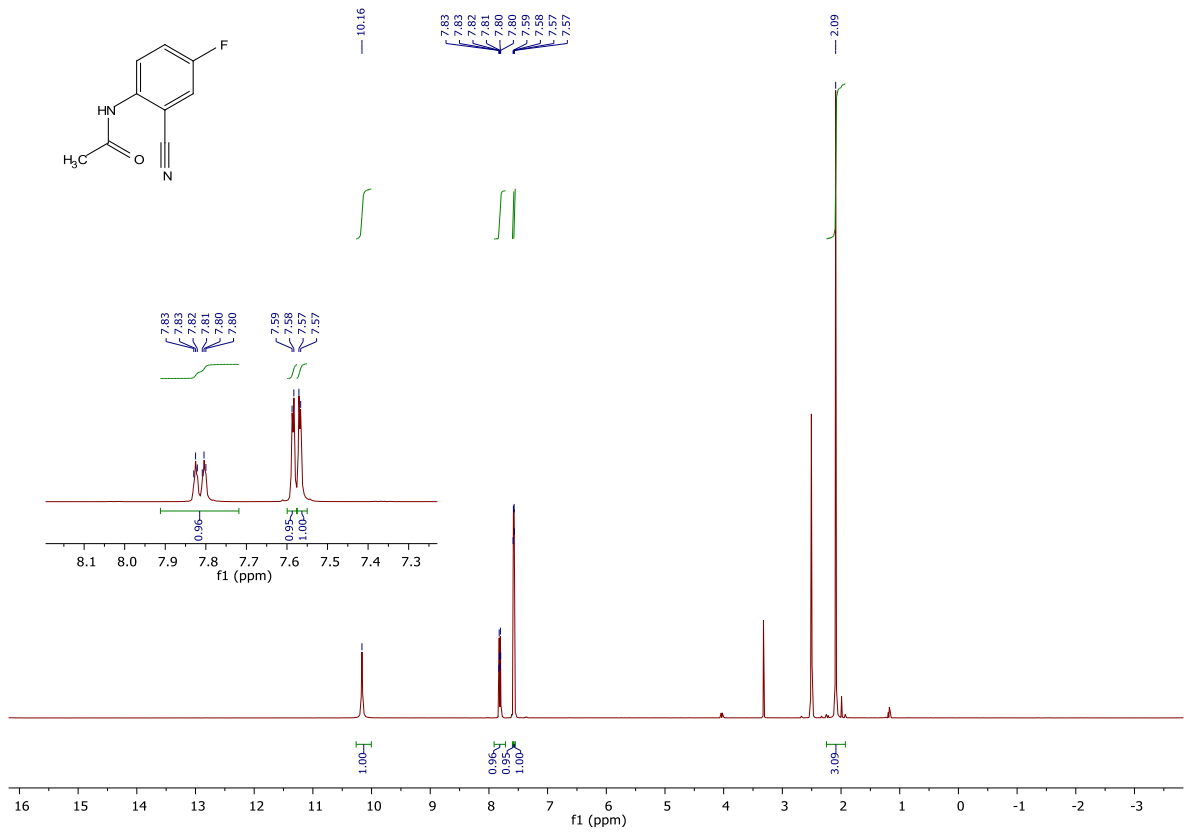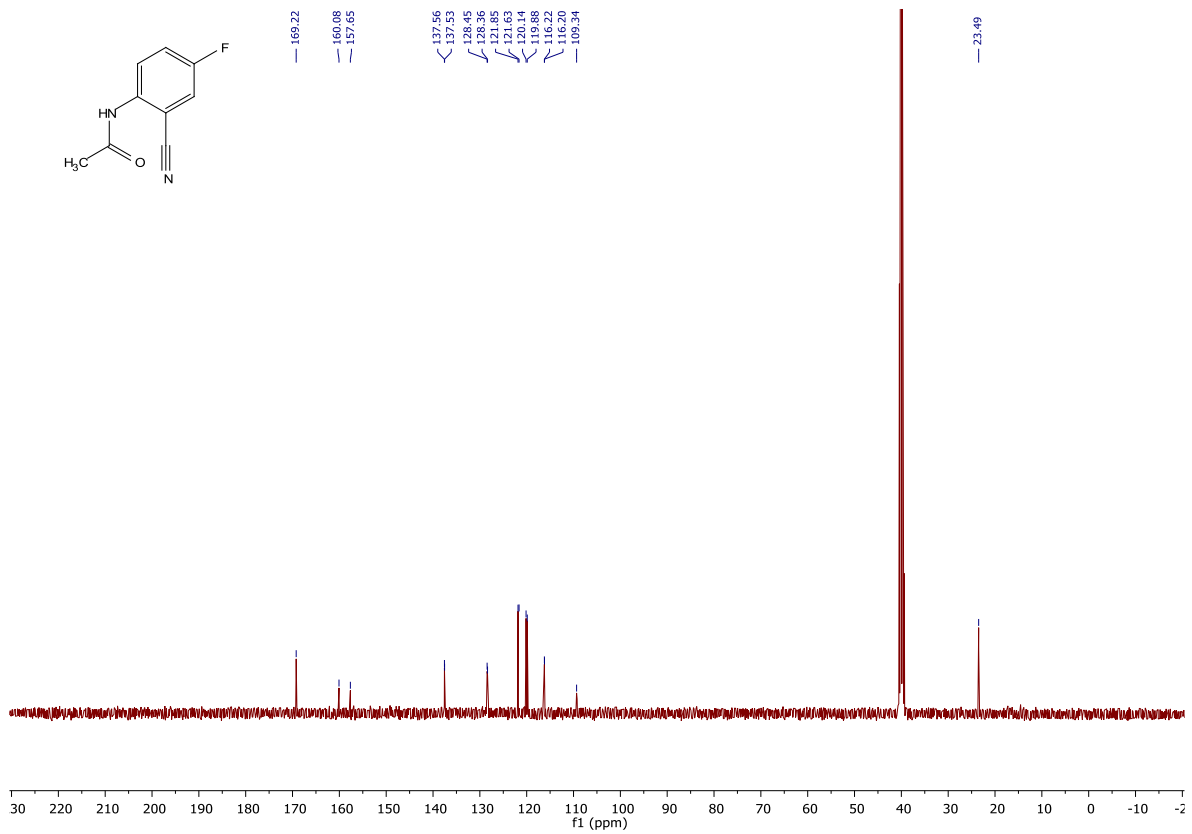

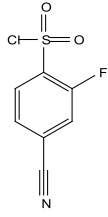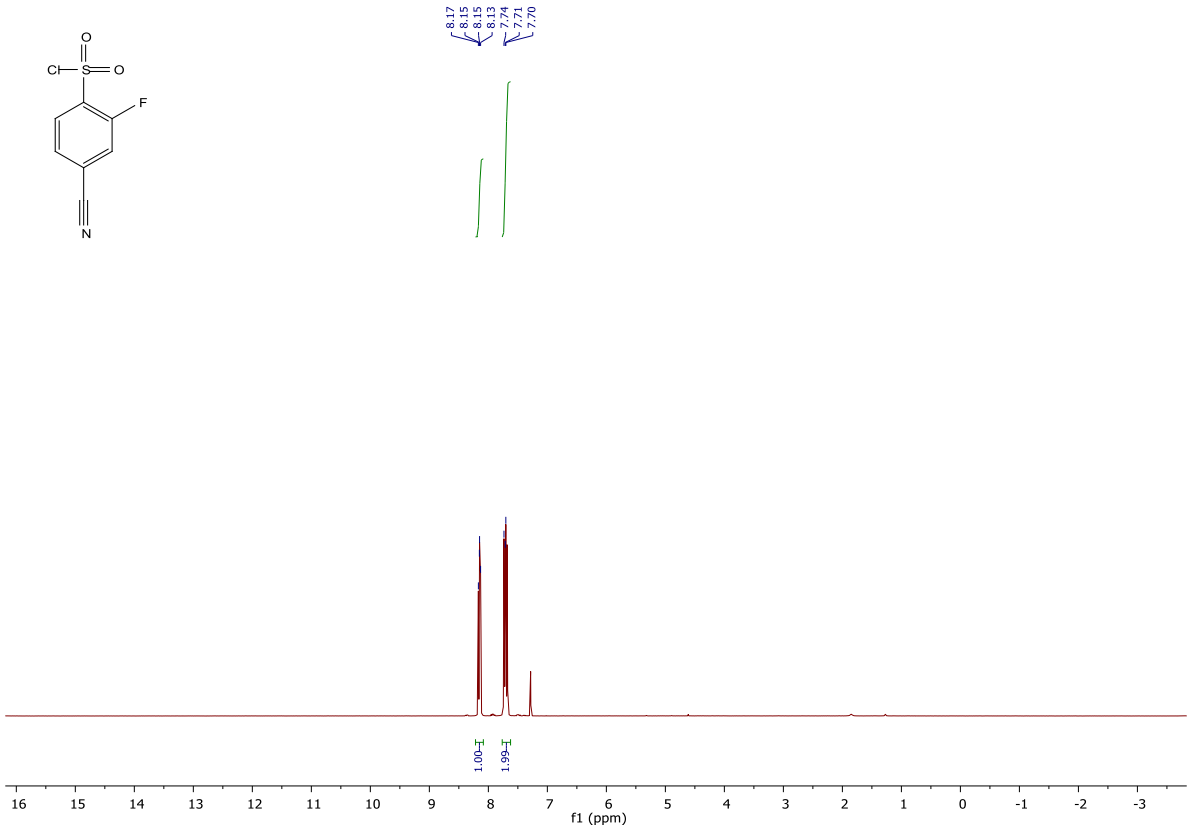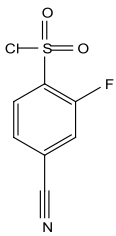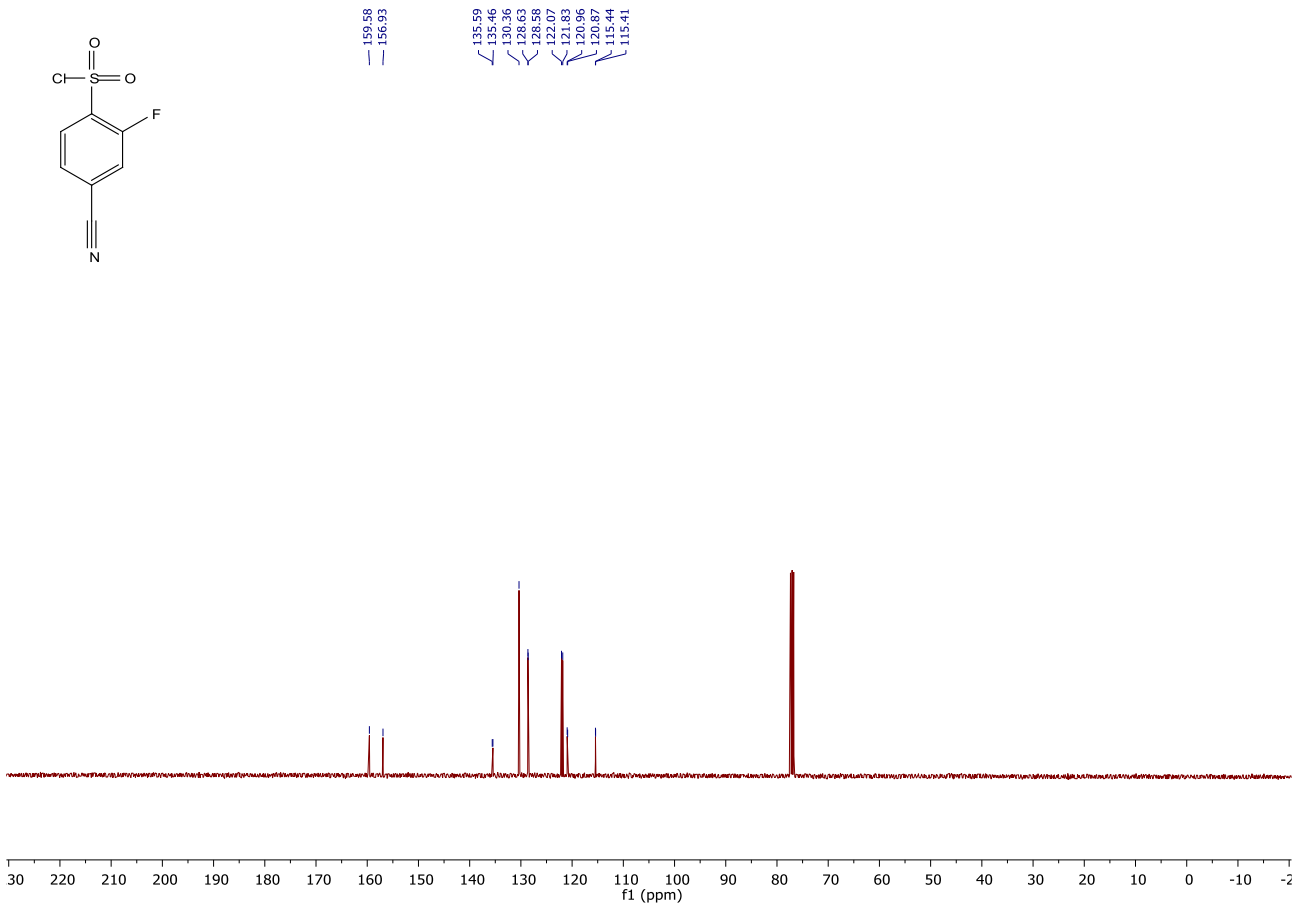

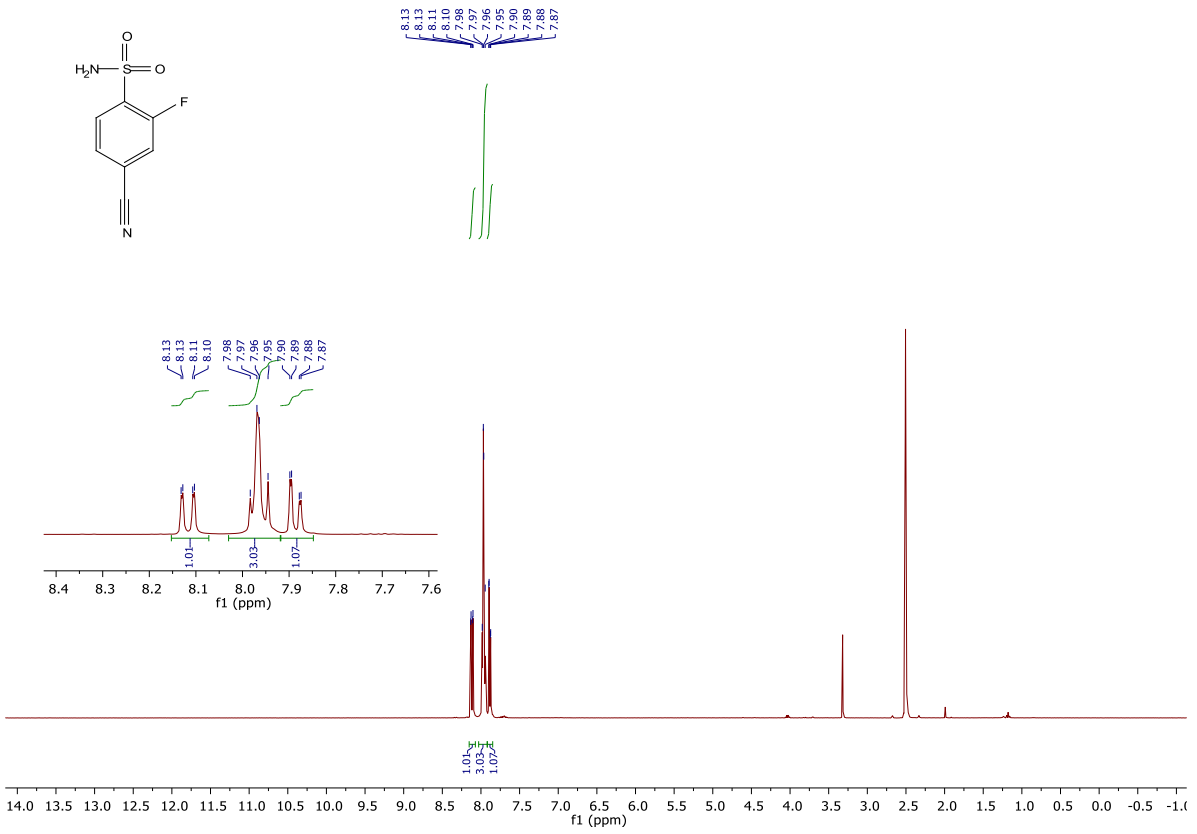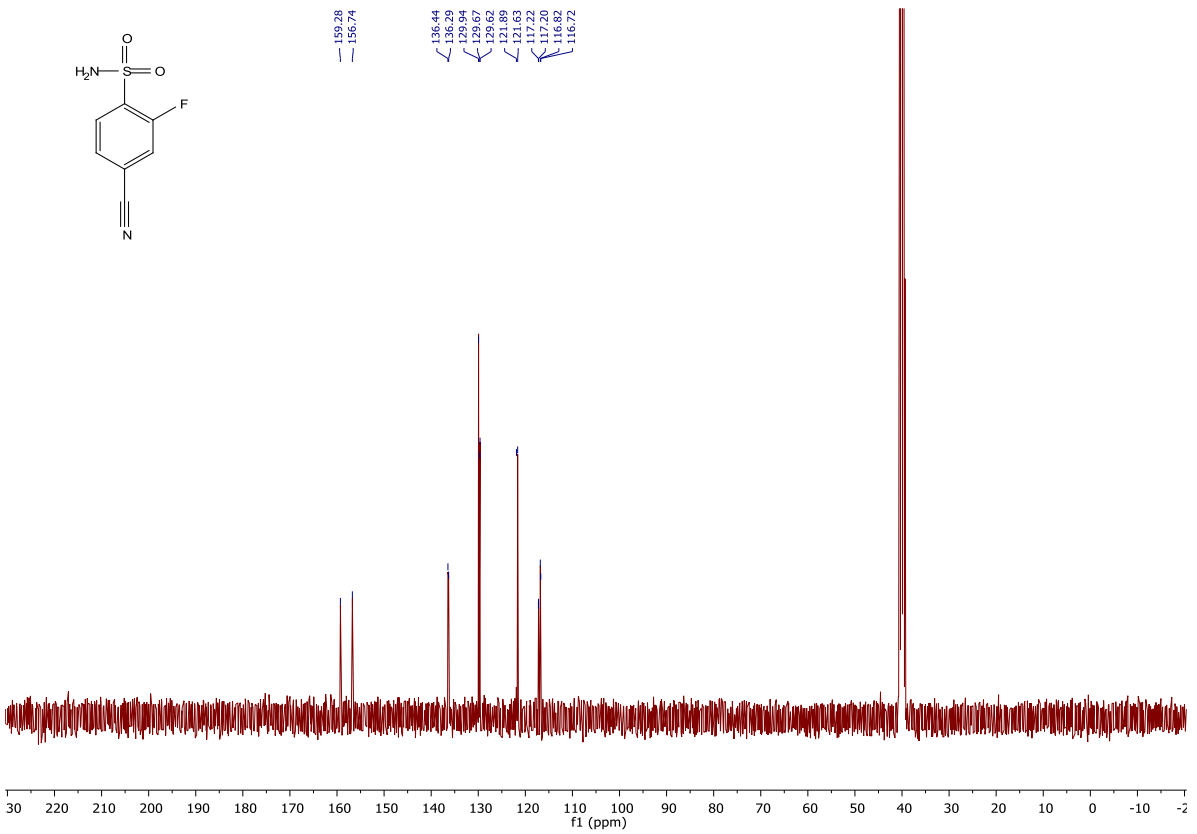

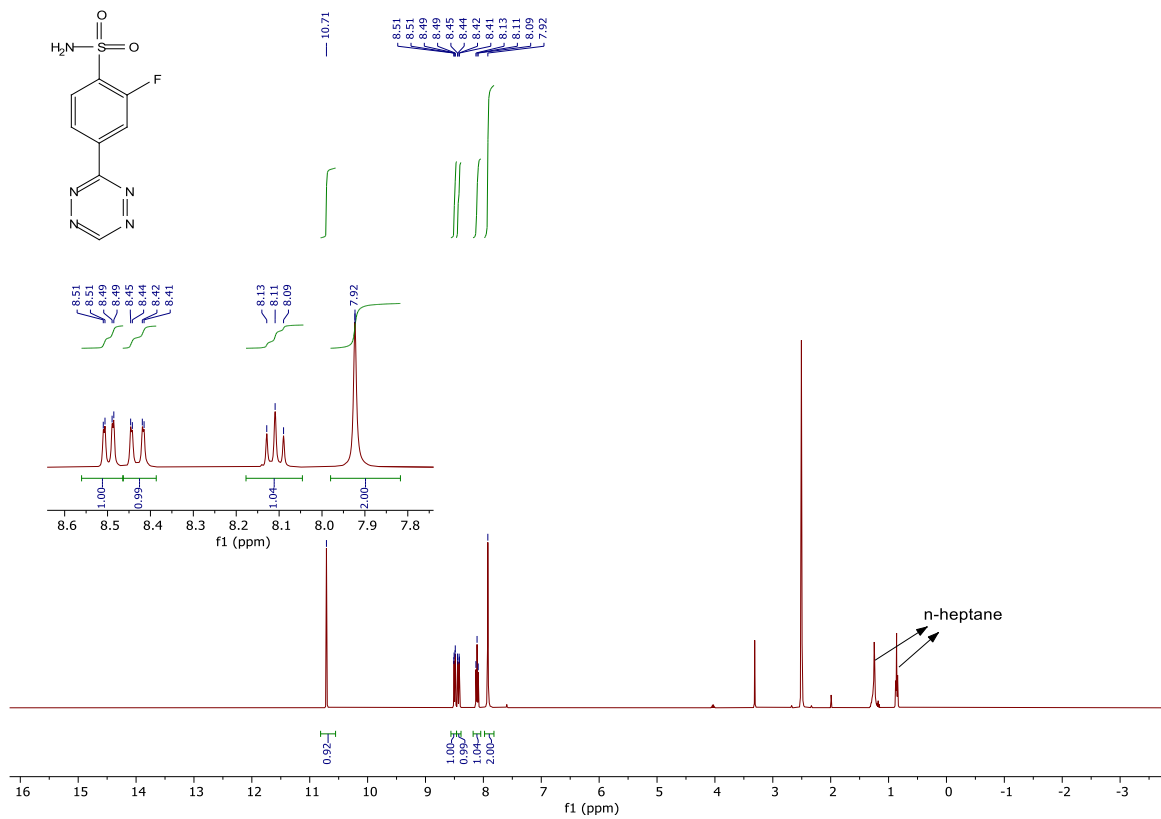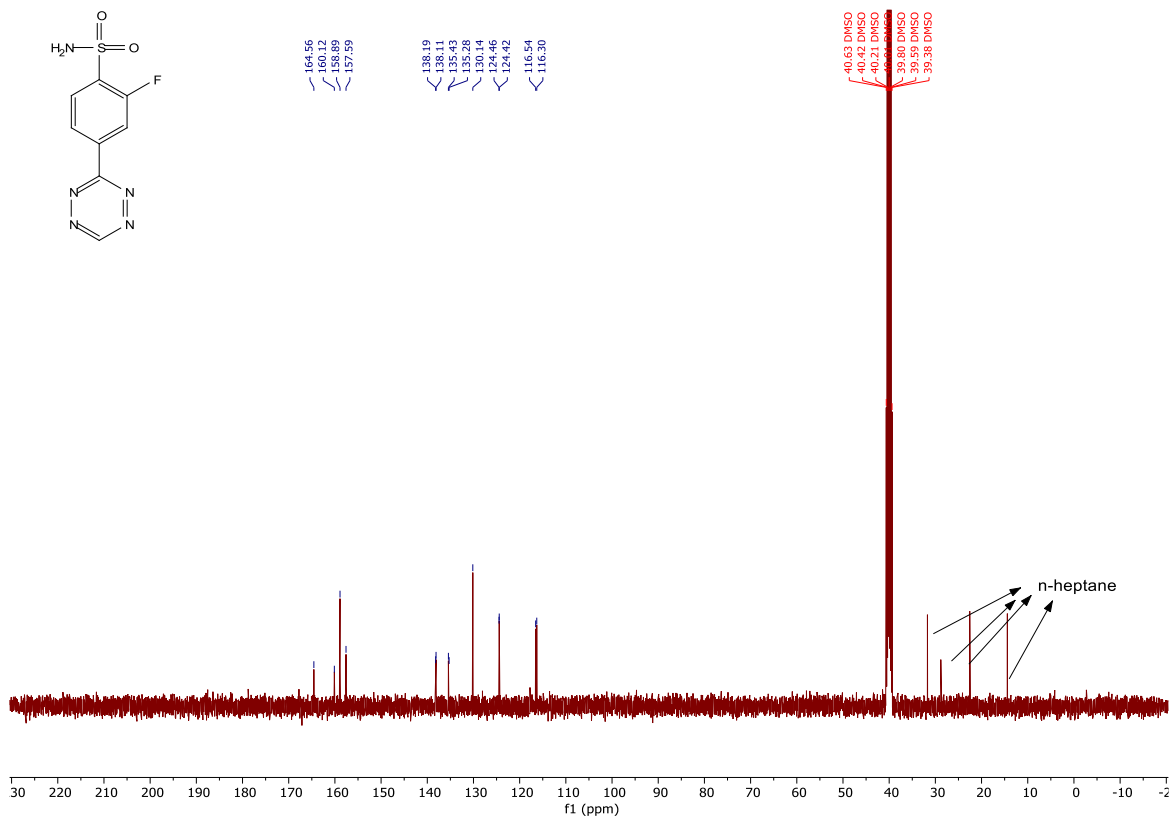

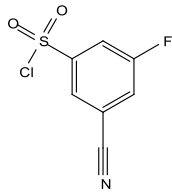

8.17  
8.03  
8.03  
8.02  
8.01  
8.01  
7.78  
7.78  
7.77  
7.76  
7.76  
7.75

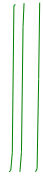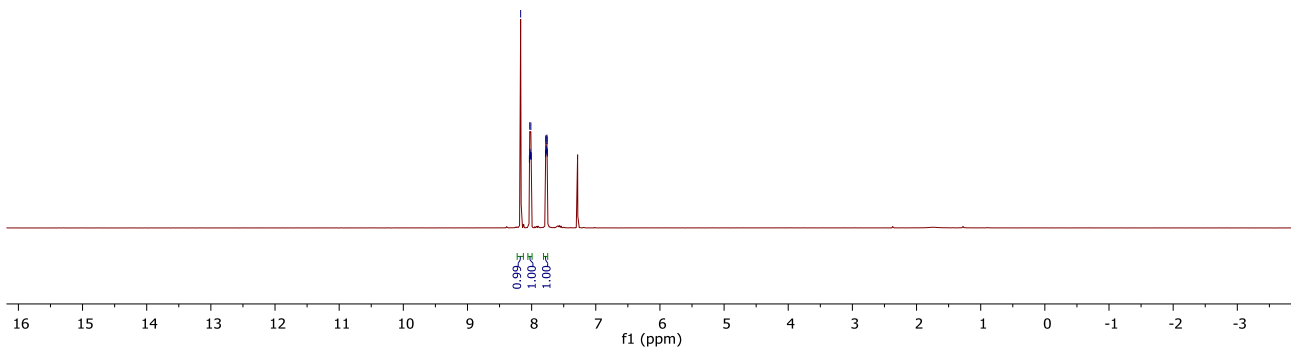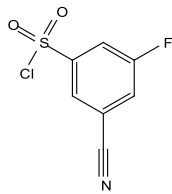

163.30  
160.72  
146.87  
146.80  
126.46  
126.42  
125.80  
125.56  
119.13  
118.88  
116.19  
116.10  
115.14  
115.11

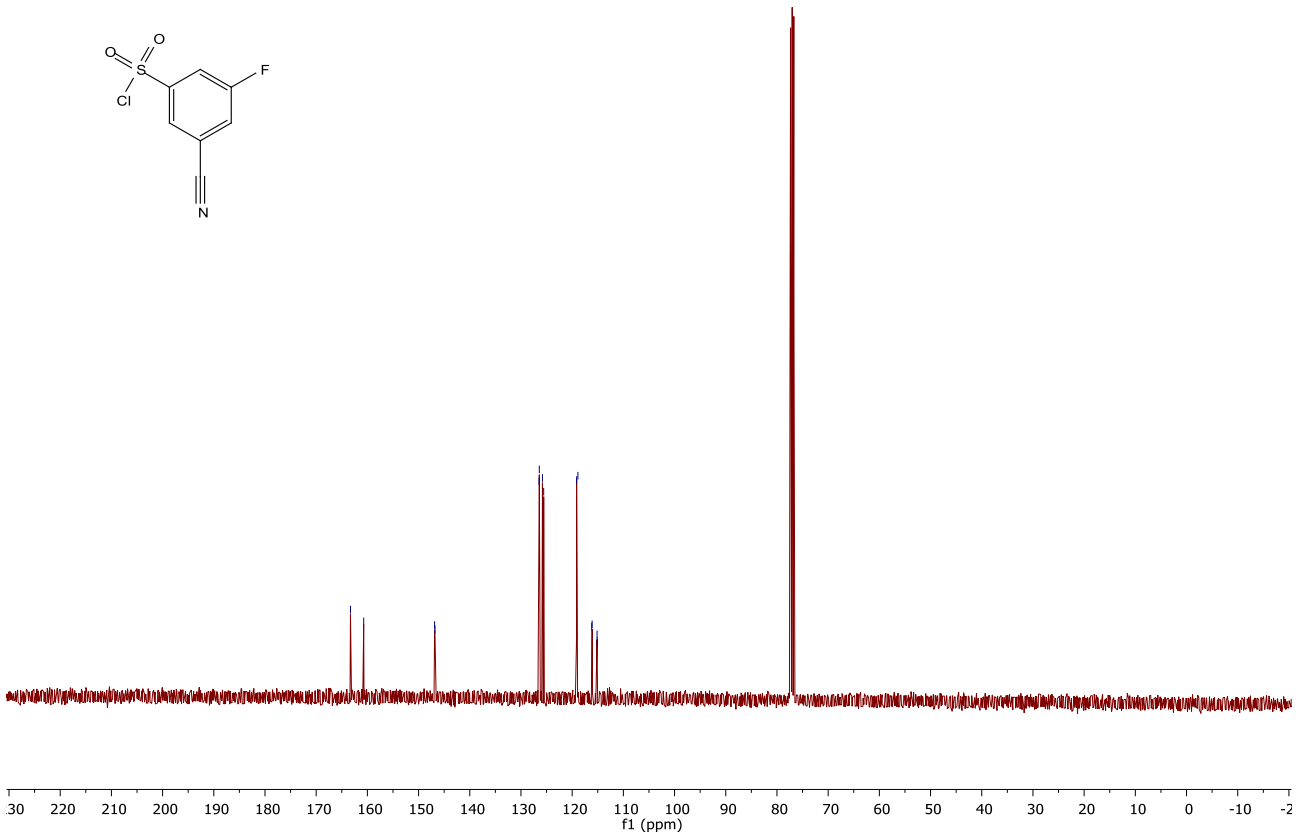

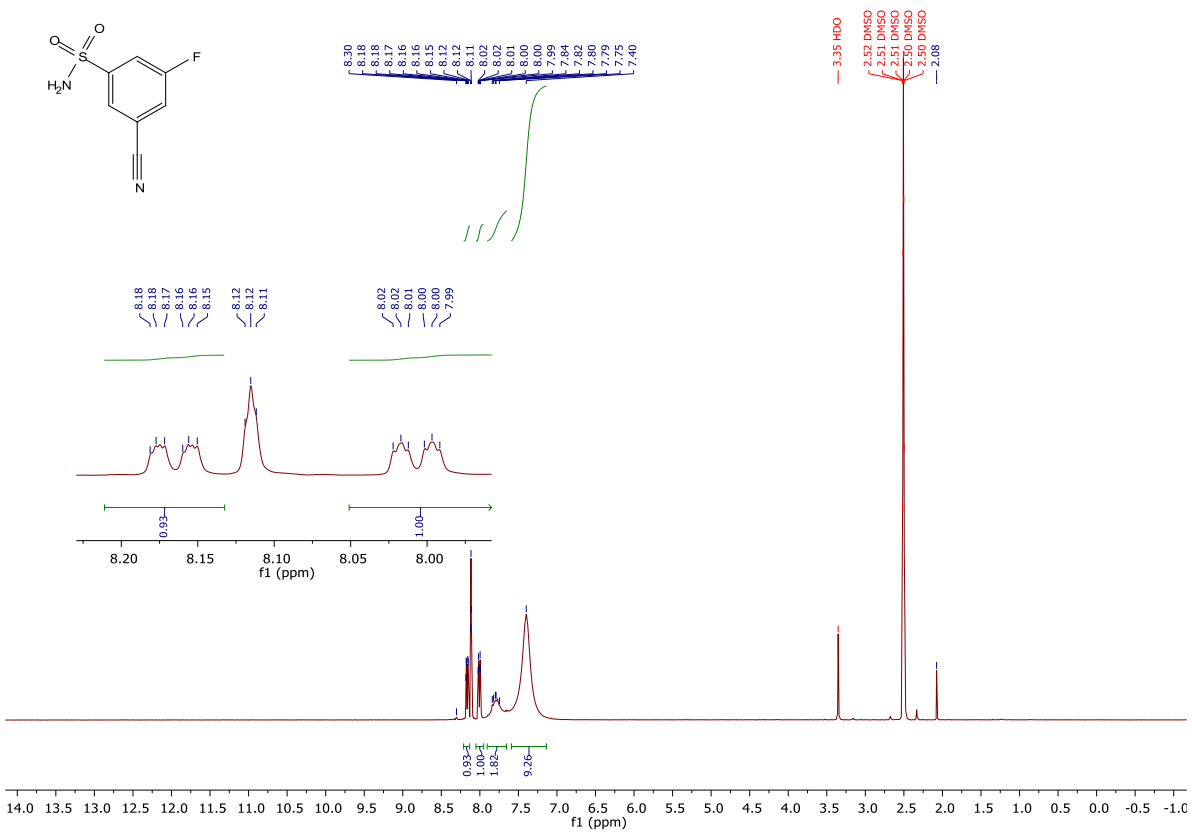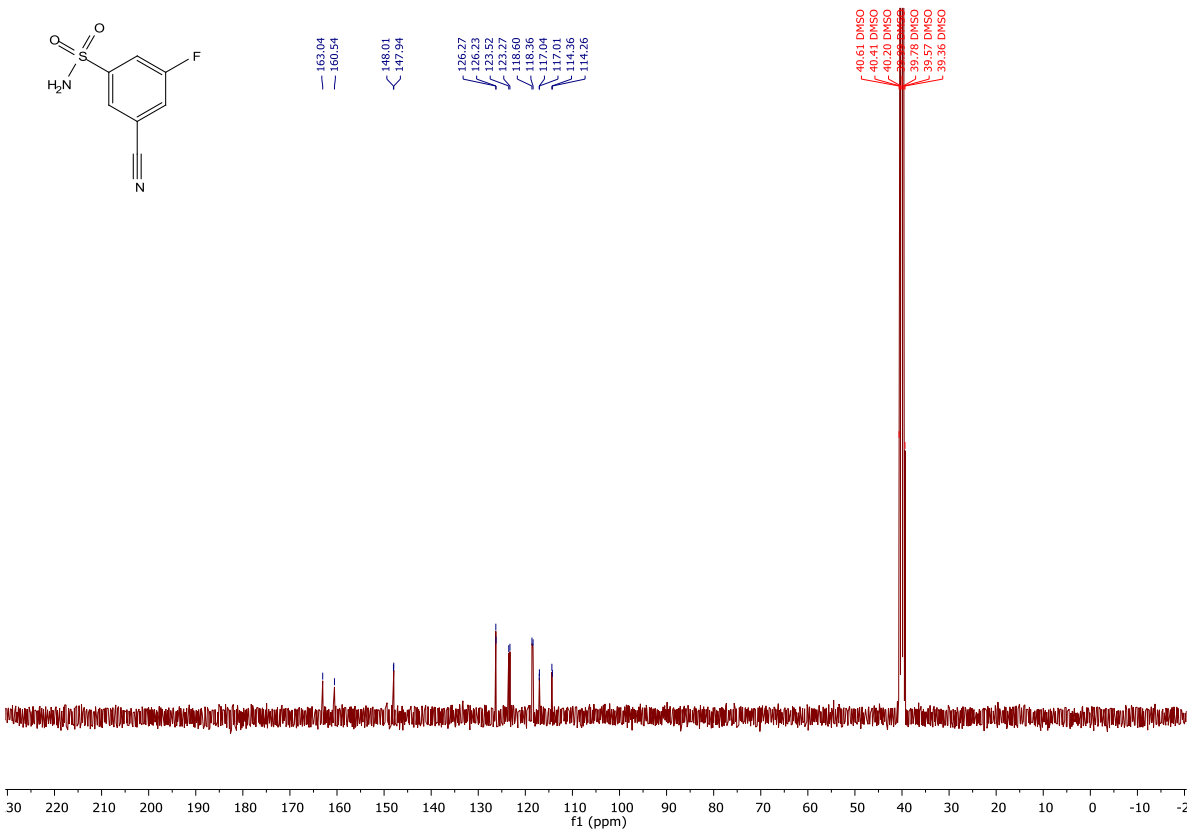

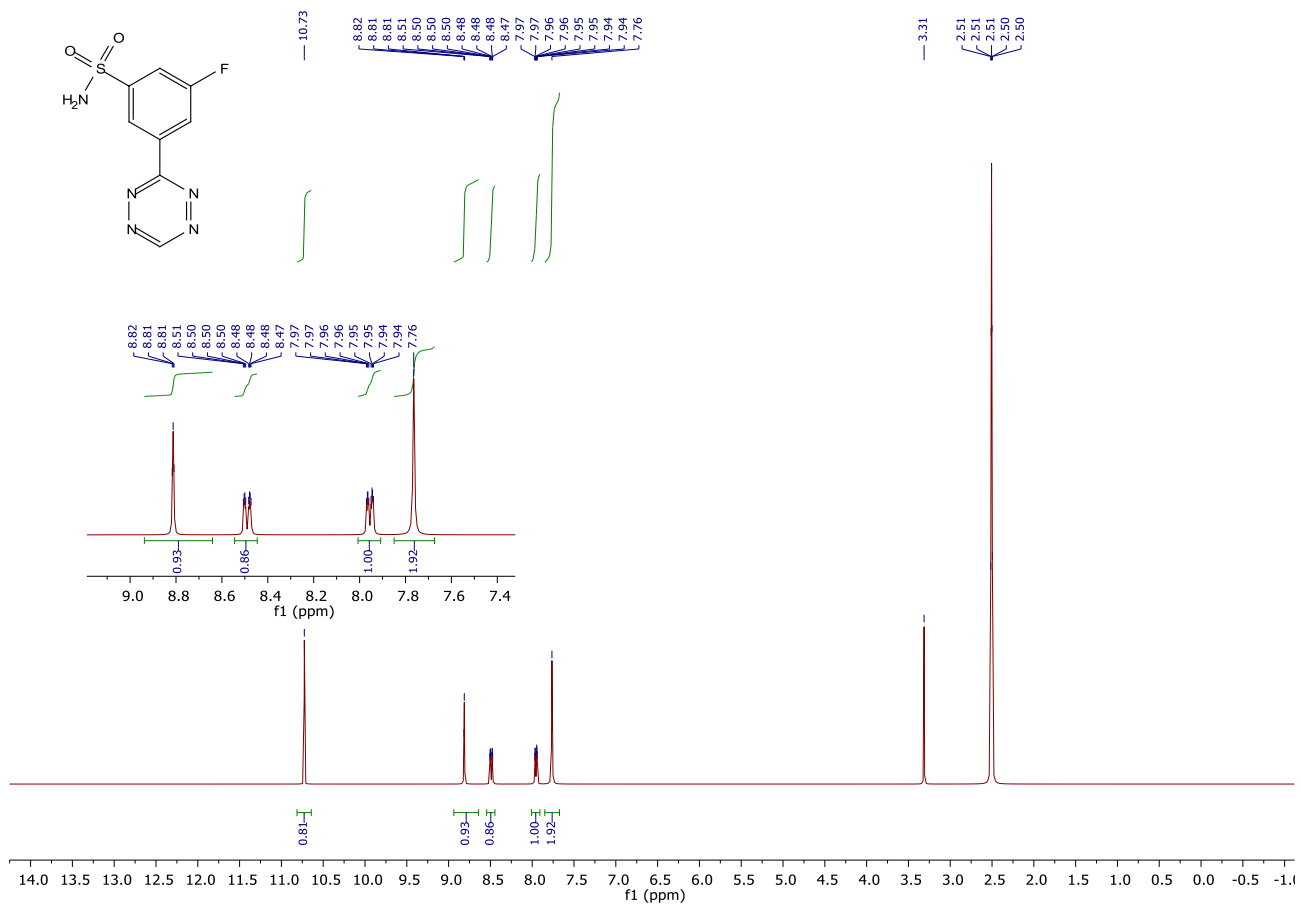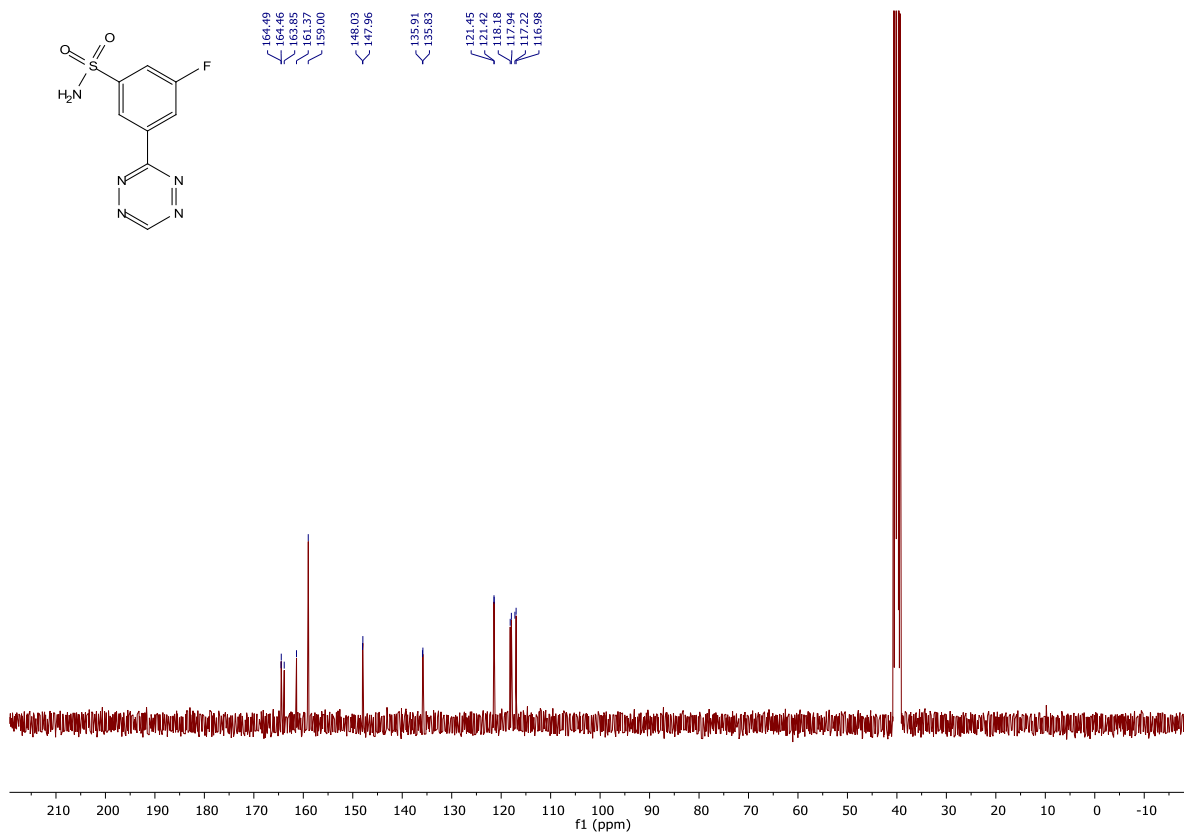



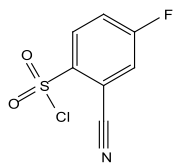

8.17  
8.15  
8.15  
8.13  
7.74  
7.71  
7.70

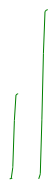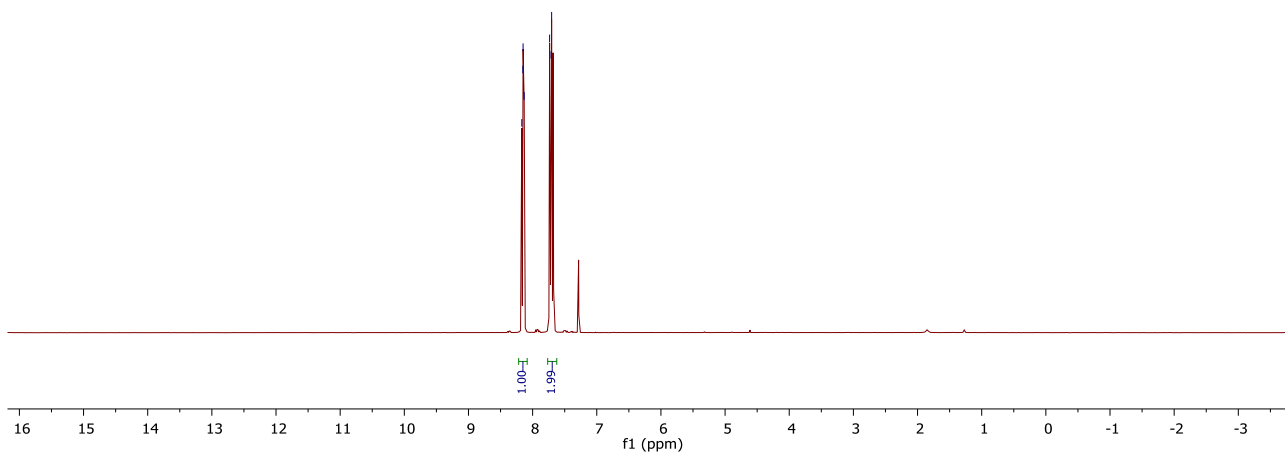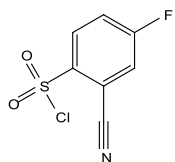

159.58  
156.93  
135.59  
135.46  
130.65  
128.63  
128.58  
122.07  
121.83  
120.96  
120.87  
115.44  
115.41

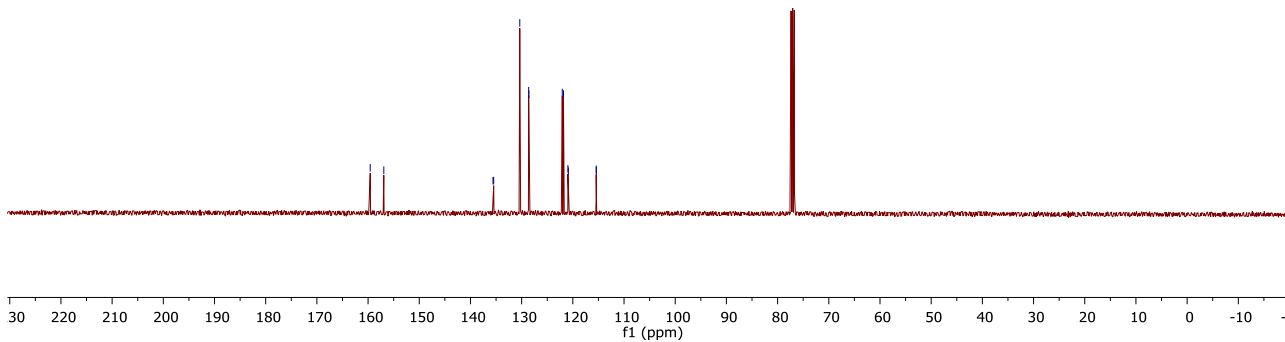

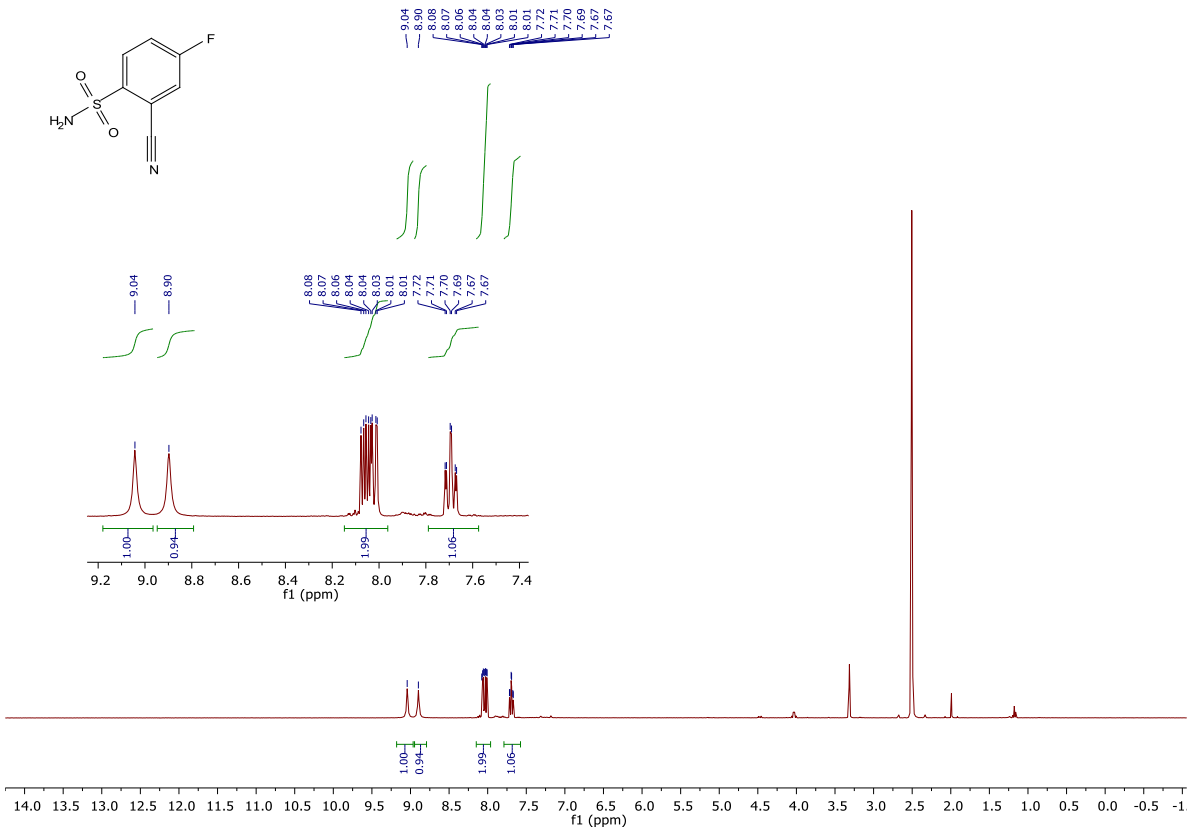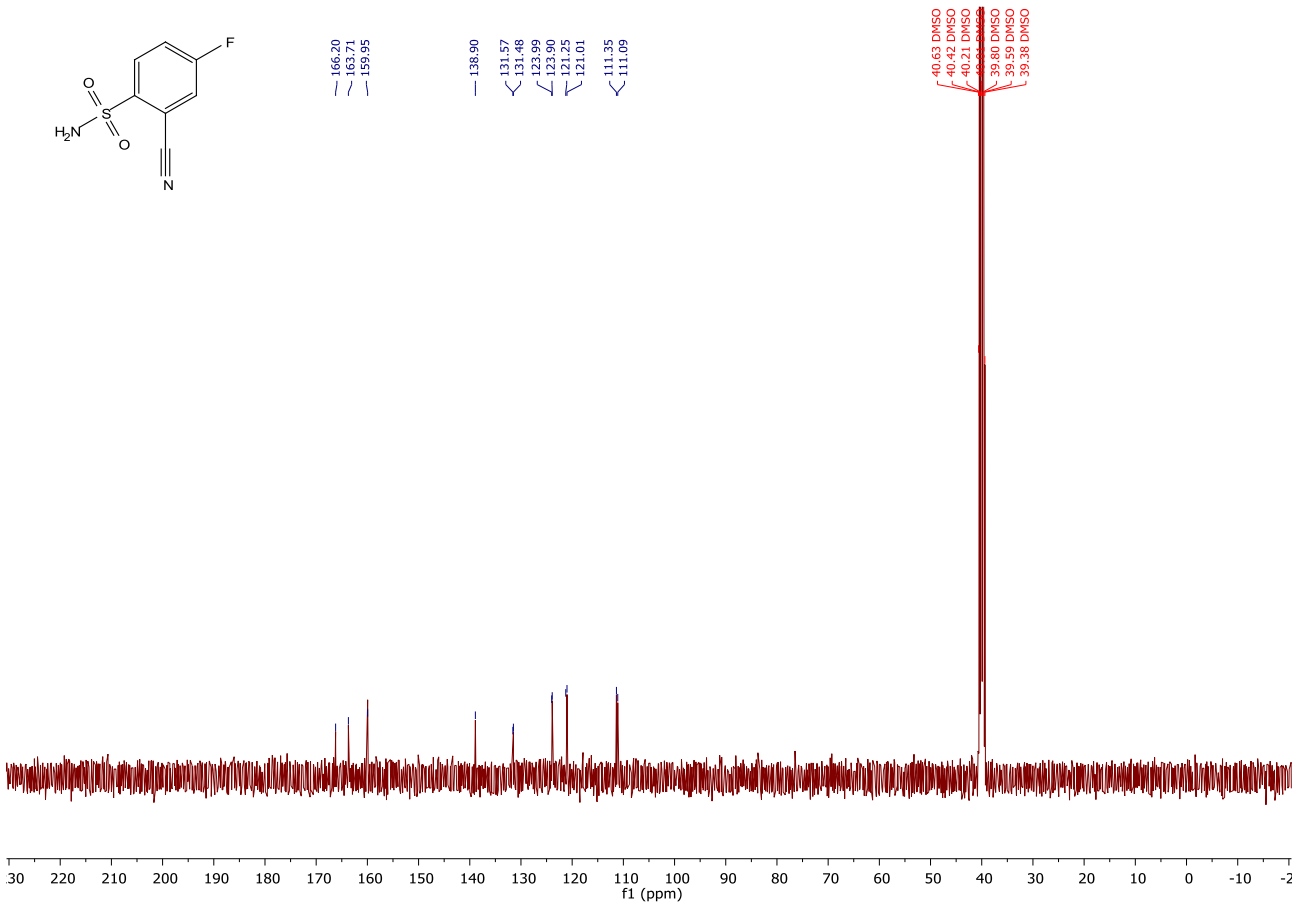

Analytical HPLC method: (Thermo Fisher® UltiMate 3000) with a C-18 column (Luna® 5u C18(2) 100Å, 150 x 4.6 mm), eluents: A: H<sub>2</sub>O with 0.1% TFA, B: MeCN with 0.1% TFA. Gradient from 100% A -> 100% B over 15minutes, back to 100% A over 4 minutes, flow rate 1.5 mL/min. Detection by UV-absorption at  $\lambda = 254$  nm on a UVD 170U detector.

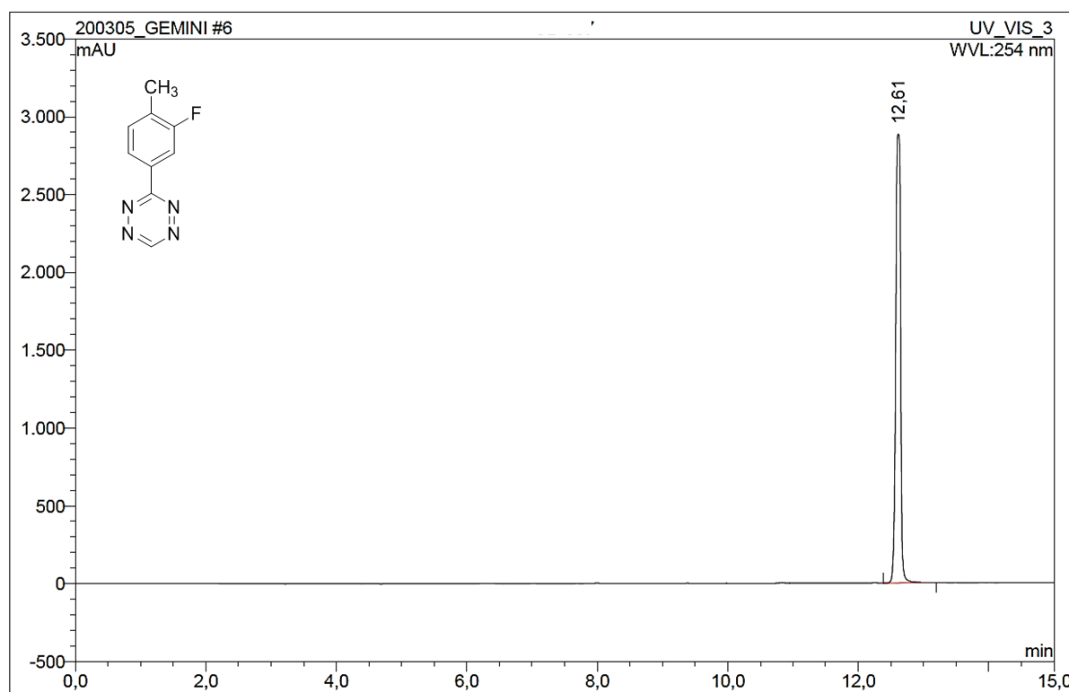

| No.           | Ret.Time<br>min | Peak Name | Height<br>mAU | Area<br>mAU*min | Rel.Area<br>% | Amount | Resolution(EP) |
|---------------|-----------------|-----------|---------------|-----------------|---------------|--------|----------------|
| 1             | 12,61           | n.a.      | 2884,966      | 257,366         | 100,00        | n.a.   | n.a.           |
| <b>Total:</b> |                 |           | 2884,966      | 257,366         | 100,00        | 0,000  |                |

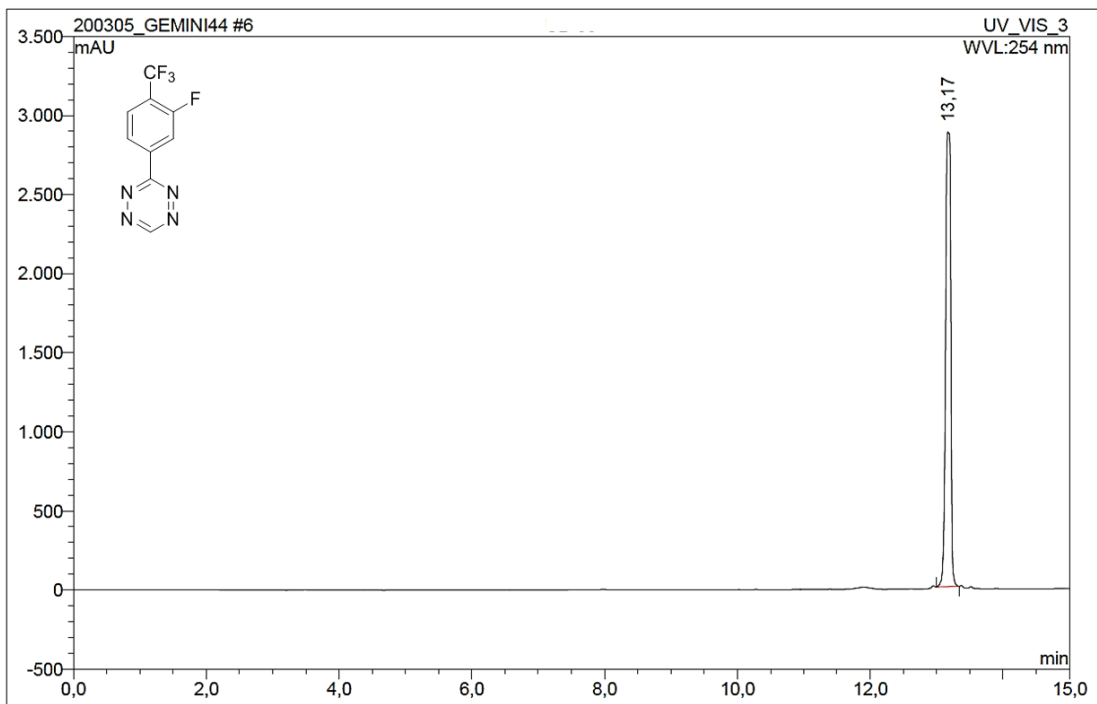

| No.           | Ret.Time<br>min | Peak Name | Height<br>mAU | Area<br>mAU*min | Rel.Area<br>% | Amount | Resolution(EP) |
|---------------|-----------------|-----------|---------------|-----------------|---------------|--------|----------------|
| 1             | 13,17           | n.a.      | 2874,381      | 264,287         | 100,00        | n.a.   | n.a.           |
| <b>Total:</b> |                 |           | 2874,381      | 264,287         | 100,00        | 0,000  |                |

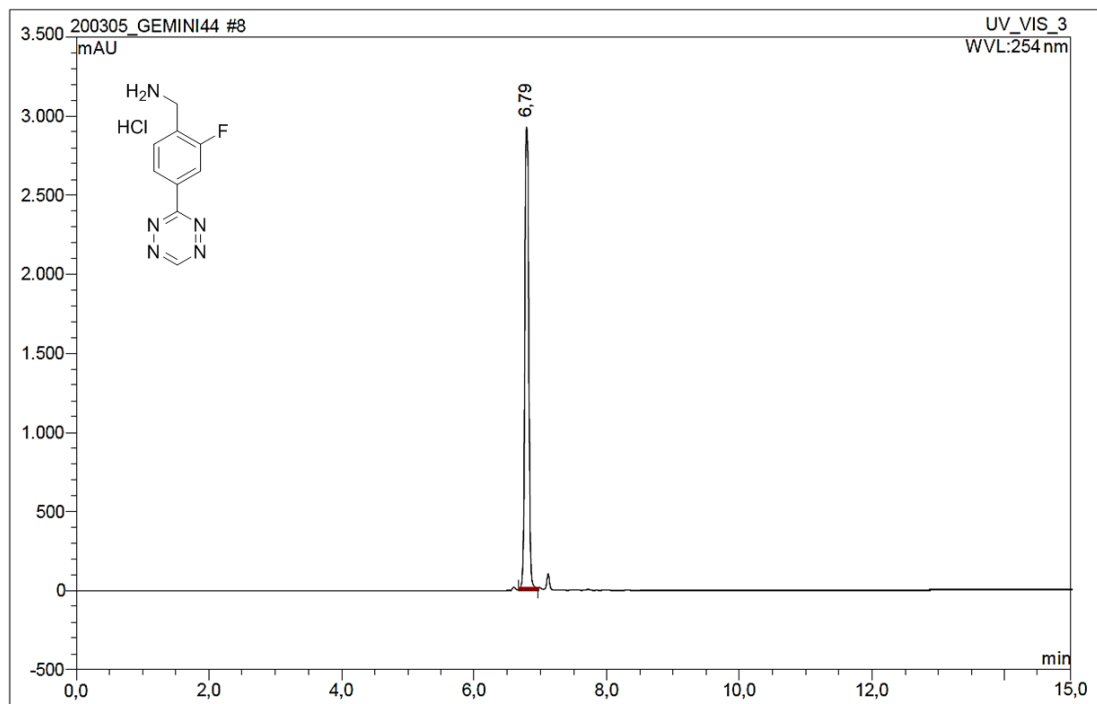

| No.           | Ret.Time<br>min | Peak Name | Height<br>mAU | Area<br>mAU*min | Rel.Area<br>% | Amount | Resolution(EP) |
|---------------|-----------------|-----------|---------------|-----------------|---------------|--------|----------------|
| 1             | 6,79            | n.a.      | 2919,690      | 199,445         | 100,00        | n.a.   | n.a.           |
| <b>Total:</b> |                 |           | 2919,690      | 199,445         | 100,00        | 0,000  |                |

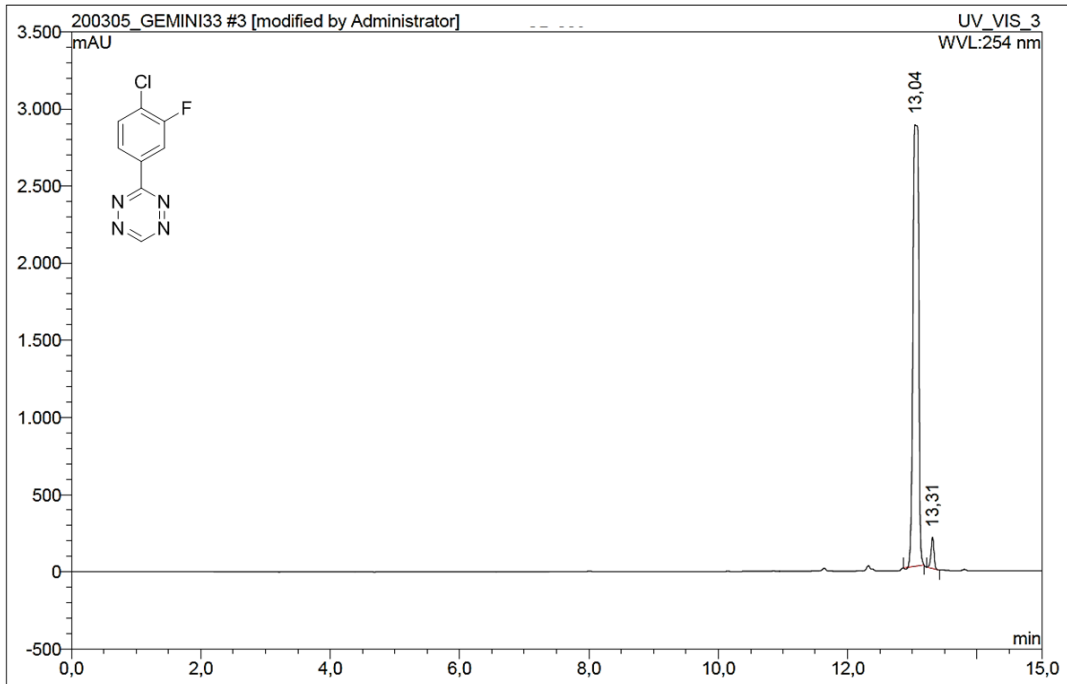

| No.           | Ret.Time<br>min | Peak Name | Height<br>mAU | Area<br>mAU*min | Rel.Area<br>% | Amount | Resolution(EP) |
|---------------|-----------------|-----------|---------------|-----------------|---------------|--------|----------------|
| 1             | 13,04           | n.a.      | 2861,995      | 290,592         | 96,43         | n.a.   | 2,16           |
| 2             | 13,31           | n.a.      | 201,972       | 10,744          | 3,57          | n.a.   | n.a.           |
| <b>Total:</b> |                 |           | 3063,966      | 301,336         | 100,00        | 0,000  |                |

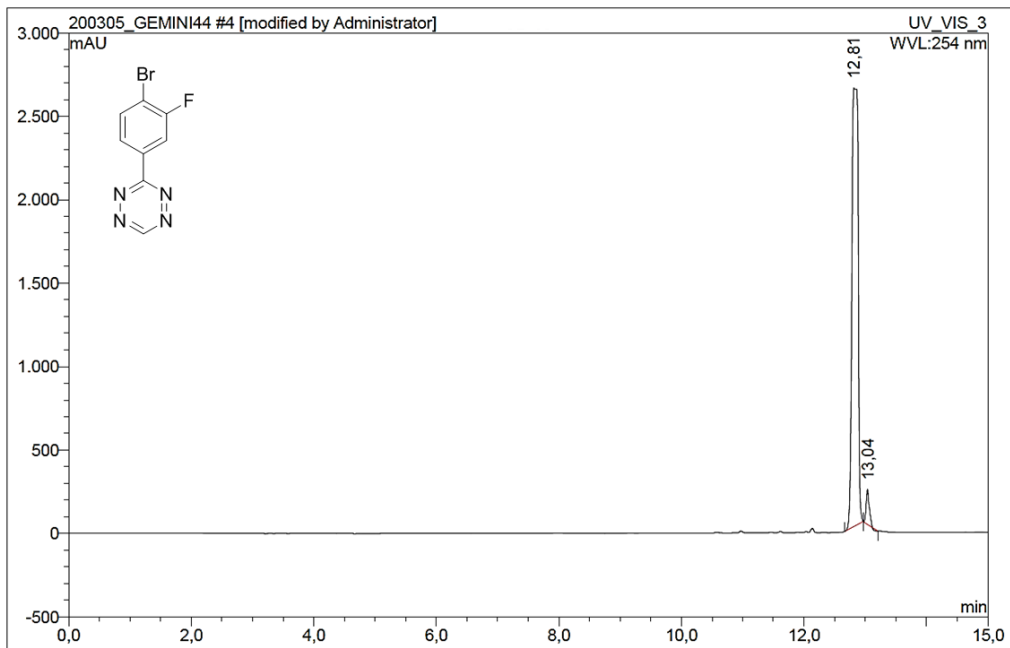

| No.           | Ret.Time<br>min | Peak Name | Height<br>mAU | Area<br>mAU*min | Rel.Area<br>% | Amount | Resolution(EP) |
|---------------|-----------------|-----------|---------------|-----------------|---------------|--------|----------------|
| 1             | 12,81           | n.a.      | 2629,785      | 305,468         | 96,32         | n.a.   | 1,62           |
| 2             | 13,04           | n.a.      | 210,761       | 11,685          | 3,68          | n.a.   | n.a.           |
| <b>Total:</b> |                 |           | 2840,546      | 317,153         | 100,00        | 0,000  |                |

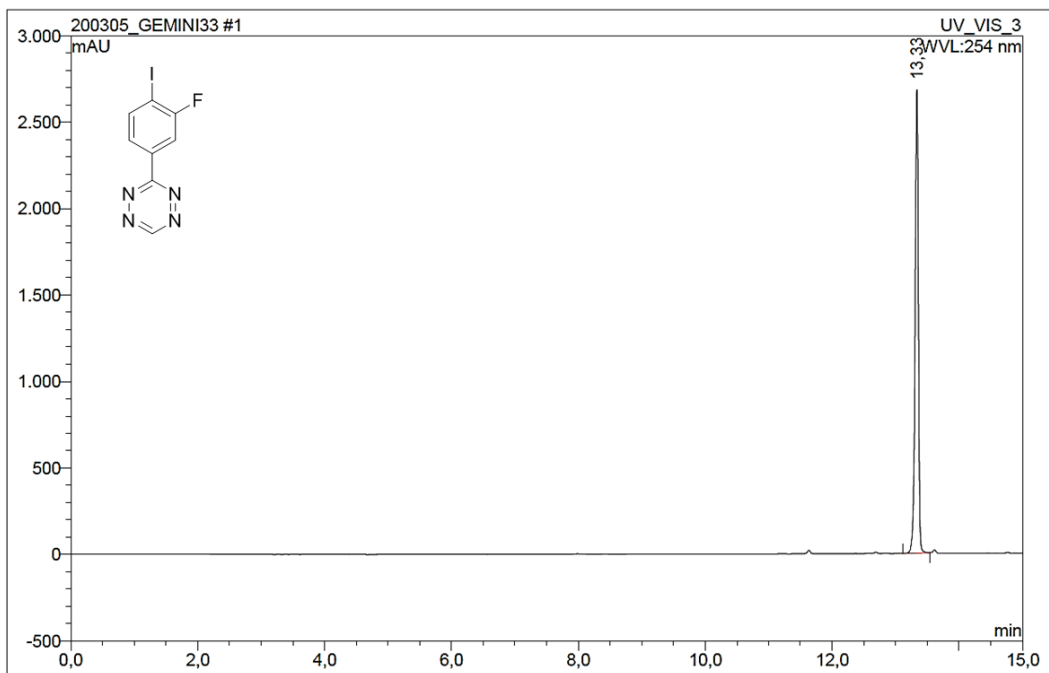

| No.           | Ret.Time<br>min | Peak Name | Height<br>mAU | Area<br>mAU*min | Rel.Area<br>% | Amount | Resolution(EP) |
|---------------|-----------------|-----------|---------------|-----------------|---------------|--------|----------------|
| 1             | 13,33           | n.a.      | 2681,049      | 164,853         | 100,00        | n.a.   | n.a.           |
| <b>Total:</b> |                 |           | 2681,049      | 164,853         | 100,00        | 0,000  |                |

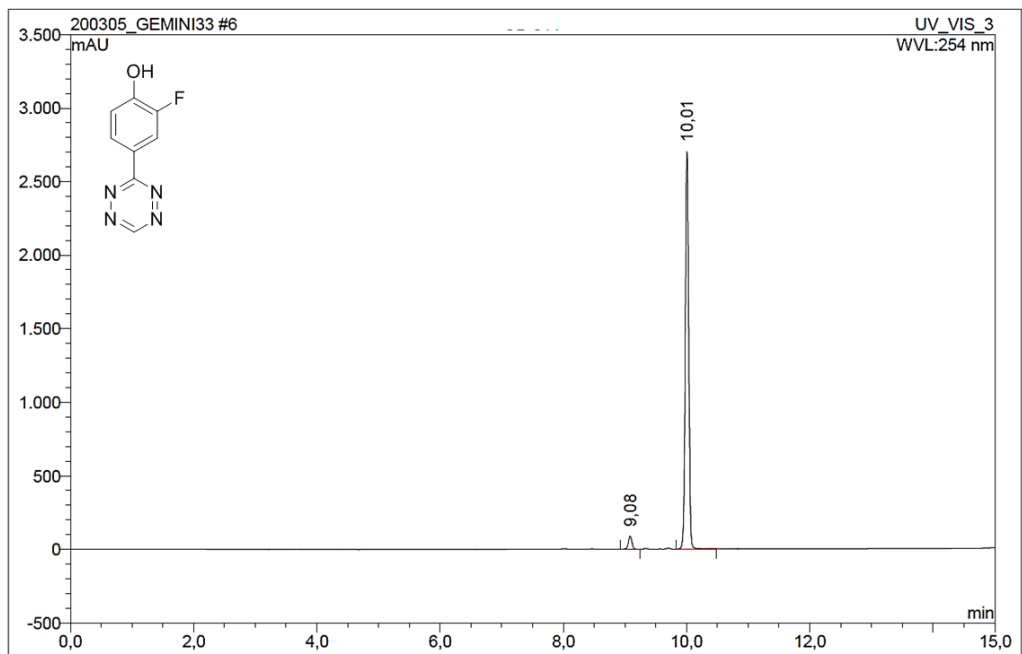

| No.           | Ret.Time<br>min | Peak Name | Height<br>mAU | Area<br>mAU*min | Rel.Area<br>% | Amount | Resolution(EP) |
|---------------|-----------------|-----------|---------------|-----------------|---------------|--------|----------------|
| 1             | 9,08            | n.a.      | 87,592        | 5,690           | 3,19          | n.a.   | 9,23           |
| 2             | 10,01           | n.a.      | 2703,672      | 172,731         | 96,81         | n.a.   | n.a.           |
| <b>Total:</b> |                 |           | 2791,264      | 178,420         | 100,00        | 0,000  |                |

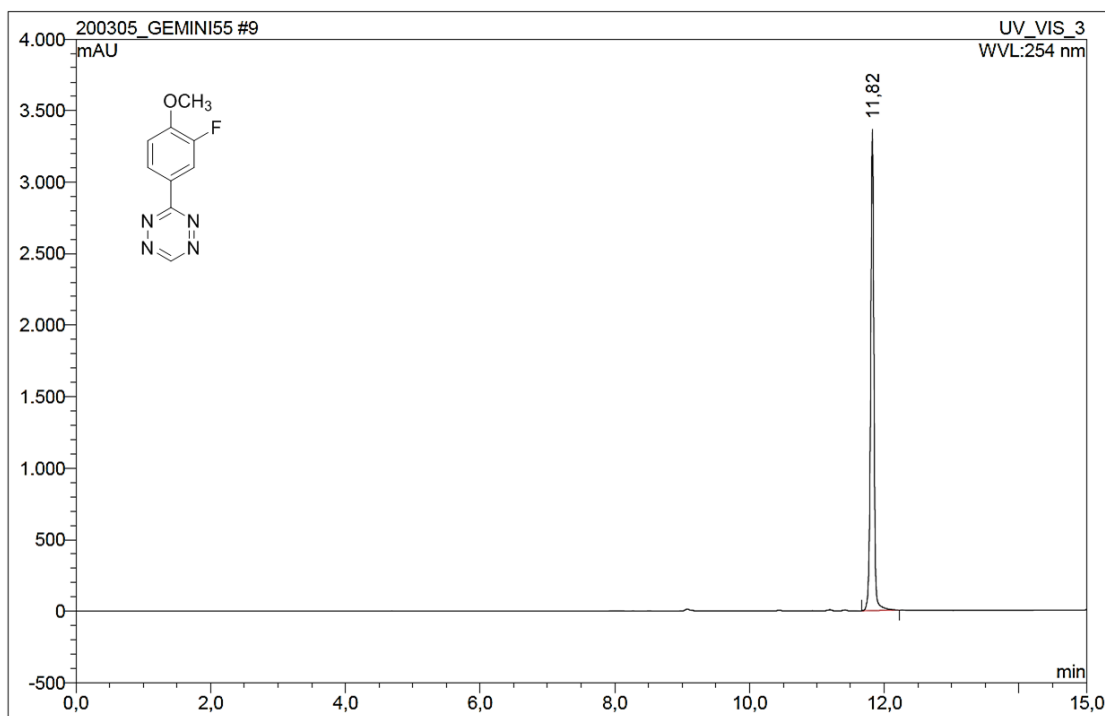

| No.           | Ret.Time<br>min | Peak Name | Height<br>mAU | Area<br>mAU*min | Rel.Area<br>% | Amount | Resolution(EP) |
|---------------|-----------------|-----------|---------------|-----------------|---------------|--------|----------------|
| 1             | 11,82           | n.a.      | 3364,798      | 196,865         | 100,00        | n.a.   | n.a.           |
| <b>Total:</b> |                 |           | 3364,798      | 196,865         | 100,00        | 0,000  |                |

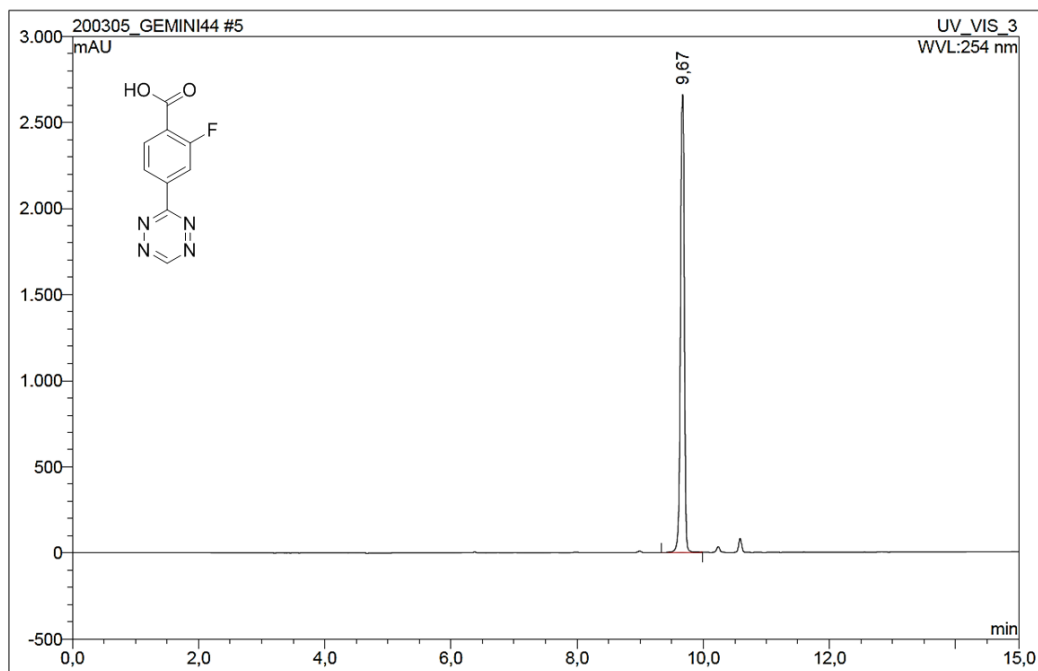

| No.           | Ret.Time<br>min | Peak Name | Height<br>mAU | Area<br>mAU*min | Rel.Area<br>% | Amount | Resolution(EP) |
|---------------|-----------------|-----------|---------------|-----------------|---------------|--------|----------------|
| 1             | 9,67            | n.a.      | 2659,185      | 181,785         | 100,00        | n.a.   | n.a.           |
| <b>Total:</b> |                 |           | 2659,185      | 181,785         | 100,00        | 0,000  |                |

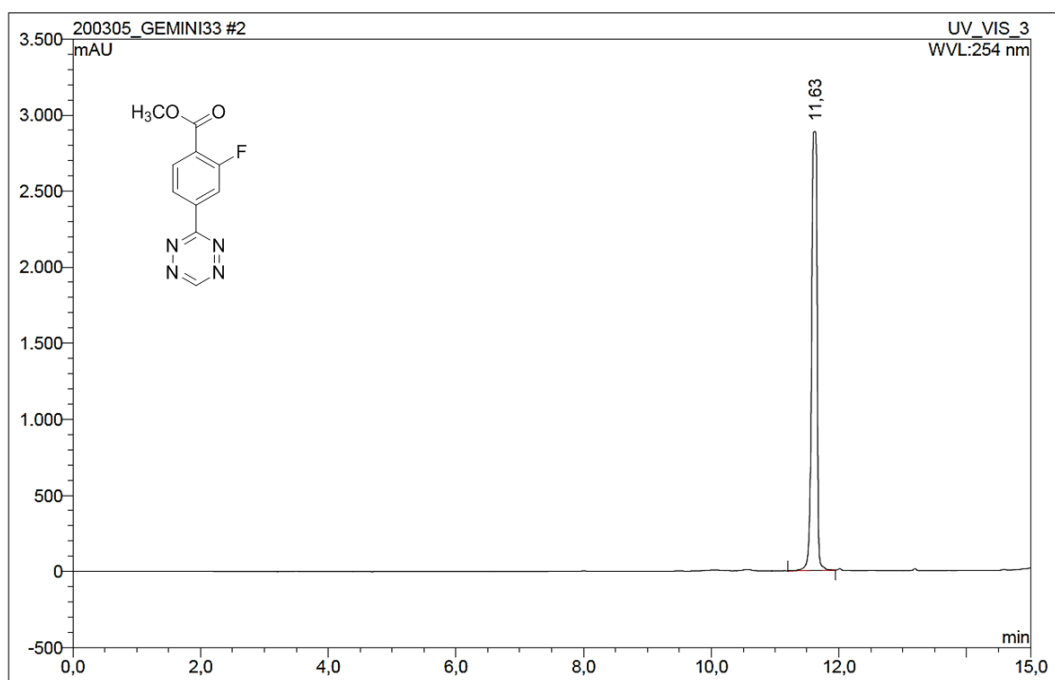

| No.           | Ret.Time<br>min | Peak Name | Height<br>mAU | Area<br>mAU*min | Rel.Area<br>% | Amount | Resolution(EP) |
|---------------|-----------------|-----------|---------------|-----------------|---------------|--------|----------------|
| 1             | 11,63           | n.a.      | 2886,123      | 290,690         | 100,00        | n.a.   | n.a.           |
| <b>Total:</b> |                 |           | 2886,123      | 290,690         | 100,00        | 0,000  |                |

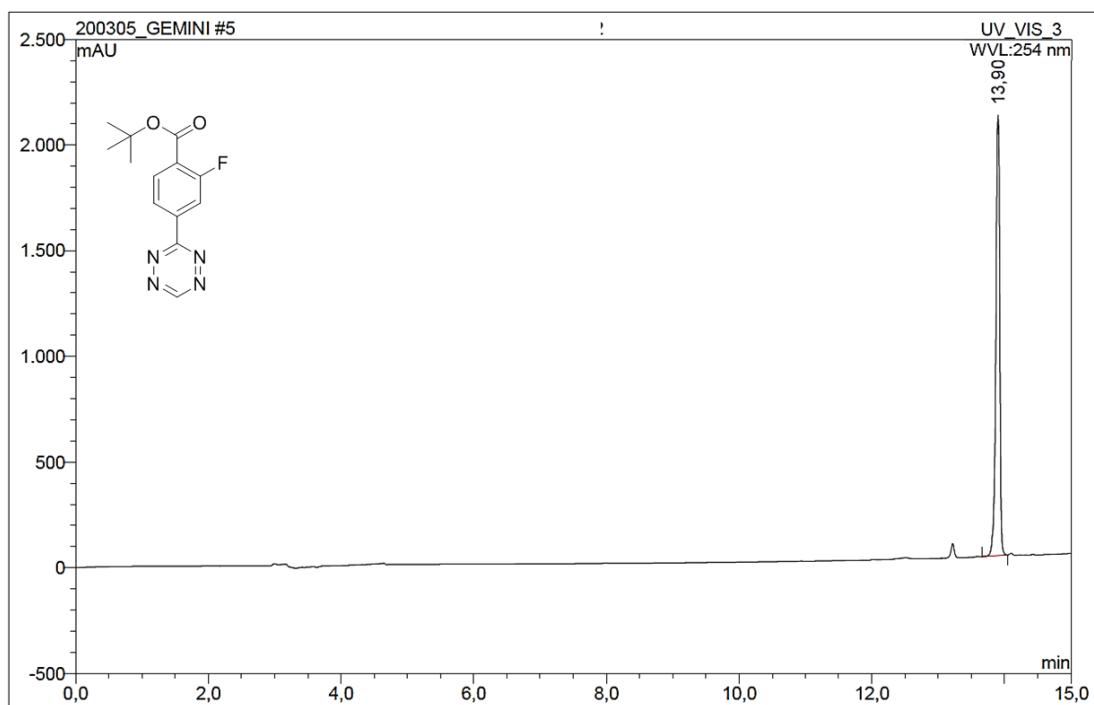

| No.           | Ret.Time<br>min | Peak Name | Height<br>mAU | Area<br>mAU*min | Rel.Area<br>% | Amount | Resolution(EP) |
|---------------|-----------------|-----------|---------------|-----------------|---------------|--------|----------------|
| 1             | 13,90           | n.a.      | 2083,803      | 145,993         | 100,00        | n.a.   | n.a.           |
| <b>Total:</b> |                 |           | 2083,803      | 145,993         | 100,00        | 0,000  |                |



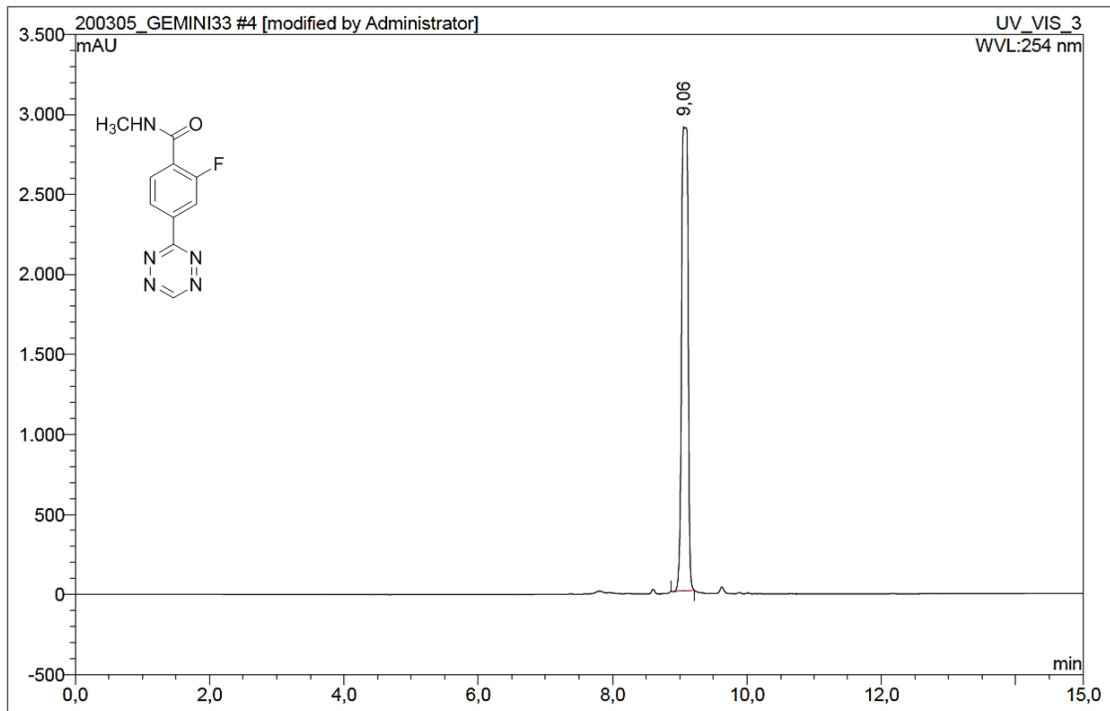

| No.           | Ret.Time<br>min | Peak Name | Height<br>mAU | Area<br>mAU*min | Rel.Area<br>% | Amount | Resolution(EP) |
|---------------|-----------------|-----------|---------------|-----------------|---------------|--------|----------------|
| 1             | 9,06            | n.a.      | 2899,156      | 318,914         | 100,00        | n.a.   | n.a.           |
| <b>Total:</b> |                 |           | 2899,156      | 318,914         | 100,00        | 0,000  |                |

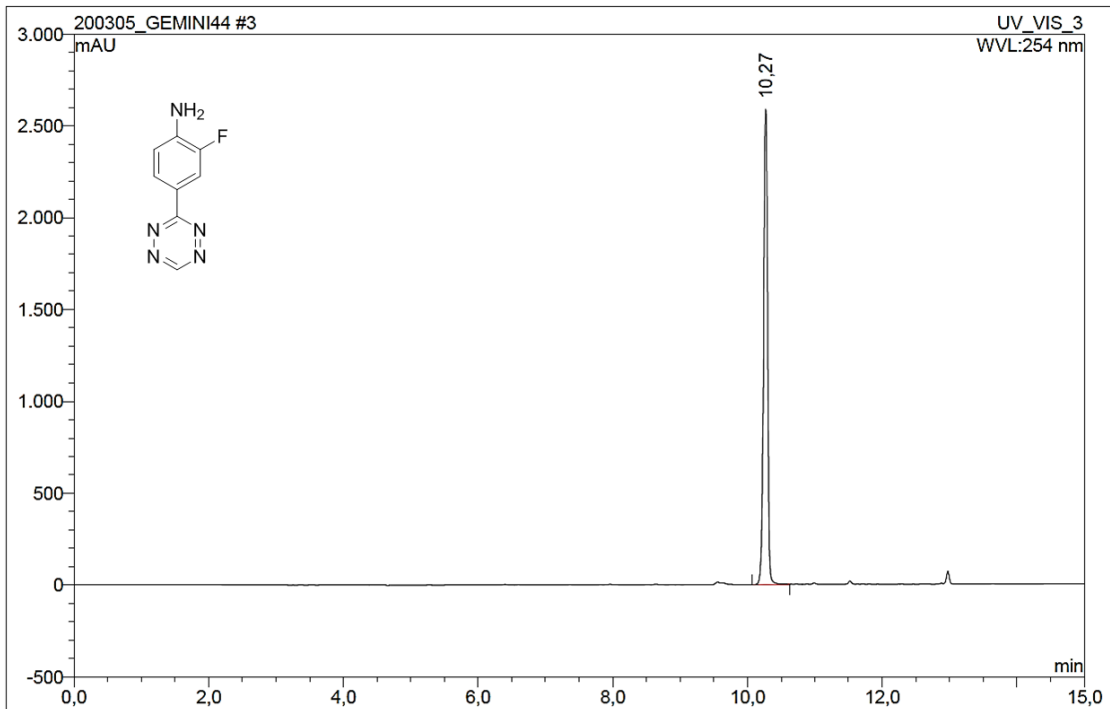

| No.           | Ret.Time<br>min | Peak Name | Height<br>mAU | Area<br>mAU*min | Rel.Area<br>% | Amount | Resolution(EP) |
|---------------|-----------------|-----------|---------------|-----------------|---------------|--------|----------------|
| 1             | 10,27           | n.a.      | 2588,835      | 179,729         | 100,00        | n.a.   | n.a.           |
| <b>Total:</b> |                 |           | 2588,835      | 179,729         | 100,00        | 0,000  |                |

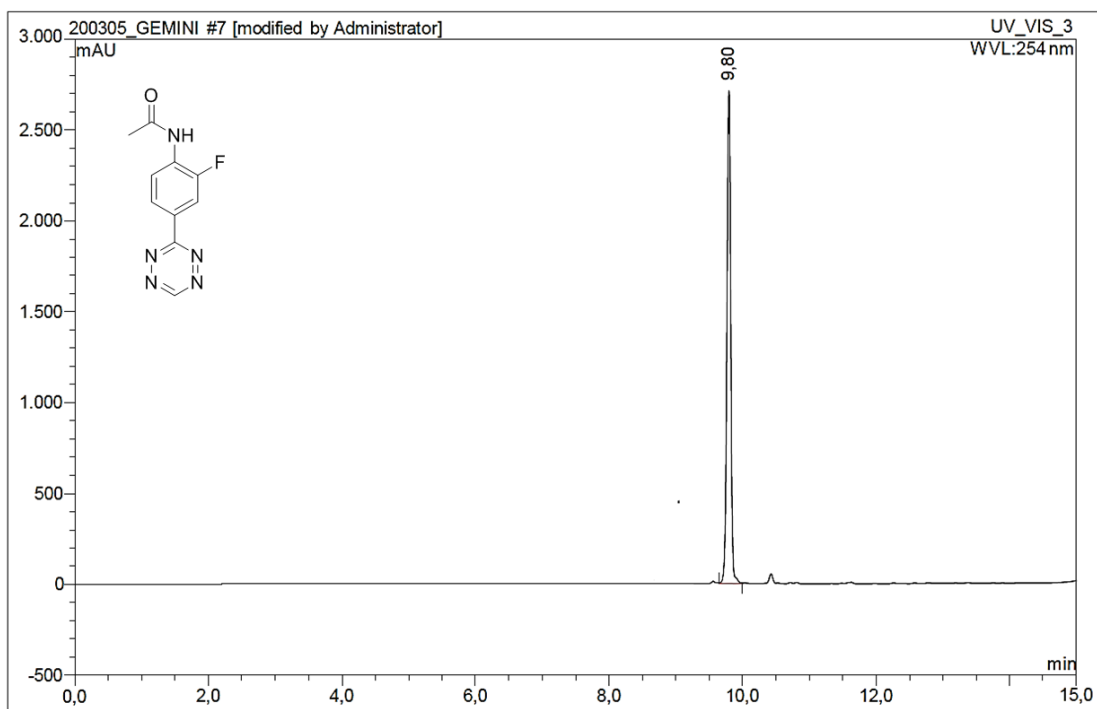

| No.           | Ret.Time<br>min | Peak Name | Height<br>mAU | Area<br>mAU*min | Rel.Area<br>% | Amount | Resolution(EP) |
|---------------|-----------------|-----------|---------------|-----------------|---------------|--------|----------------|
| 1             | 9,80            | n.a.      | 2710,415      | 182,985         | 100,00        | n.a.   | n.a.           |
| <b>Total:</b> |                 |           | 2710,415      | 182,985         | 100,00        | 0,000  |                |

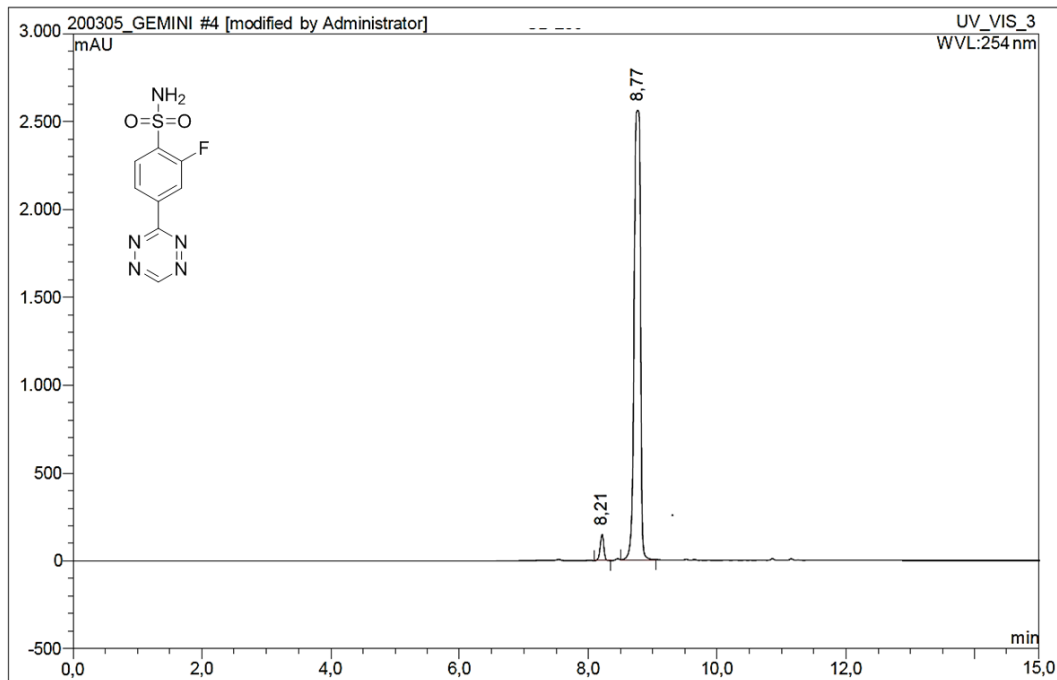

| No.           | Ret.Time<br>min | Peak Name | Height<br>mAU | Area<br>mAU*min | Rel.Area<br>% | Amount | Resolution(EP) |
|---------------|-----------------|-----------|---------------|-----------------|---------------|--------|----------------|
| 1             | 8,21            | n.a.      | 149,124       | 9,859           | 3,27          | n.a.   | 3,90           |
| 2             | 8,77            | n.a.      | 2558,796      | 291,219         | 96,73         | n.a.   | n.a.           |
| <b>Total:</b> |                 |           | 2707,920      | 301,078         | 100,00        | 0,000  |                |

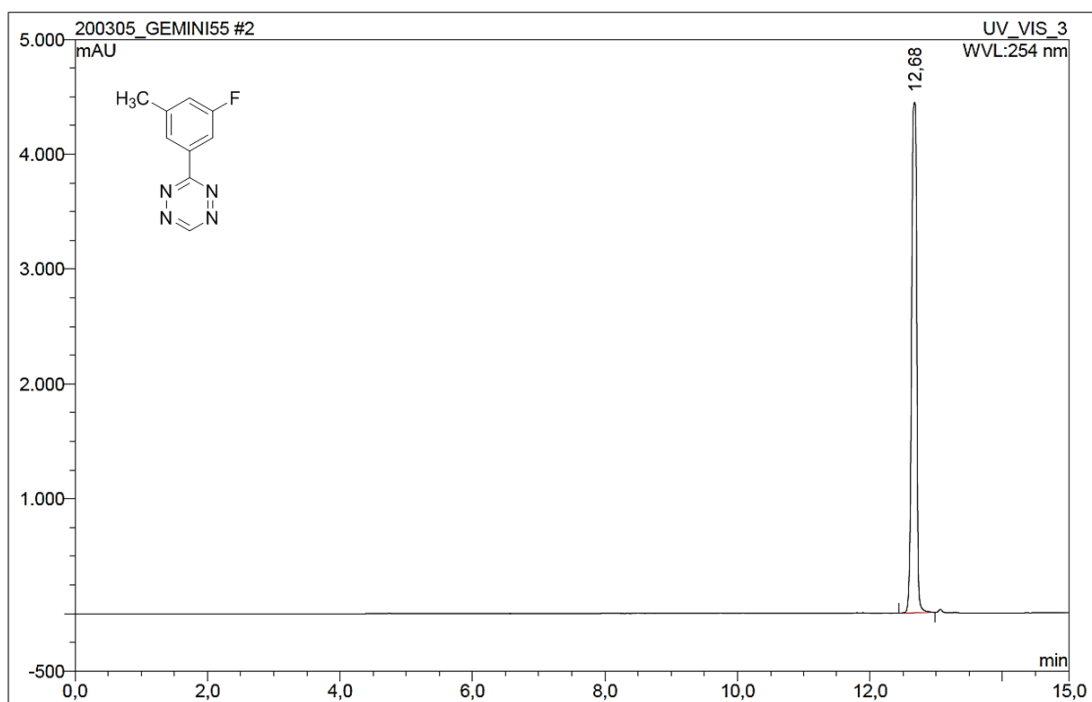

| No.           | Ret.Time<br>min | Peak Name | Height<br>mAU | Area<br>mAU*min | Rel.Area<br>% | Amount | Resolution(EP) |
|---------------|-----------------|-----------|---------------|-----------------|---------------|--------|----------------|
| 1             | 12,68           | n.a.      | 4447,213      | 389,900         | 100,00        | n.a.   | n.a.           |
| <b>Total:</b> |                 |           | 4447,213      | 389,900         | 100,00        | 0,000  |                |

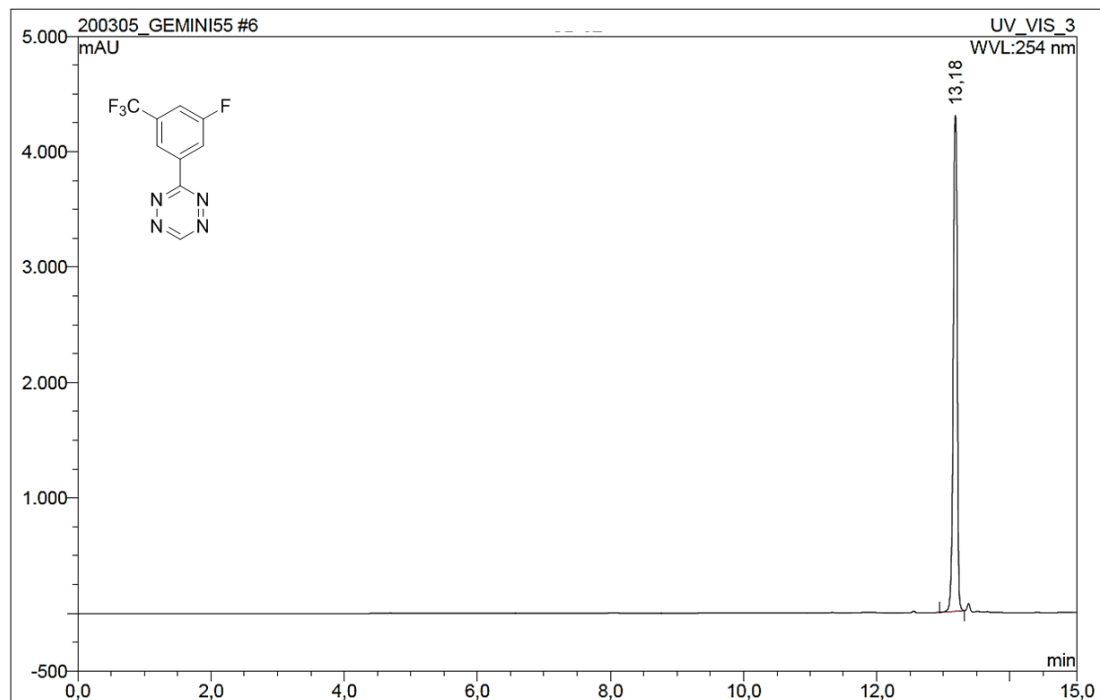

| No.           | Ret.Time<br>min | Peak Name | Height<br>mAU | Area<br>mAU*min | Rel.Area<br>% | Amount | Resolution(EP) |
|---------------|-----------------|-----------|---------------|-----------------|---------------|--------|----------------|
| 1             | 13,18           | n.a.      | 4296,797      | 299,251         | 100,00        | n.a.   | n.a.           |
| <b>Total:</b> |                 |           | 4296,797      | 299,251         | 100,00        | 0,000  |                |

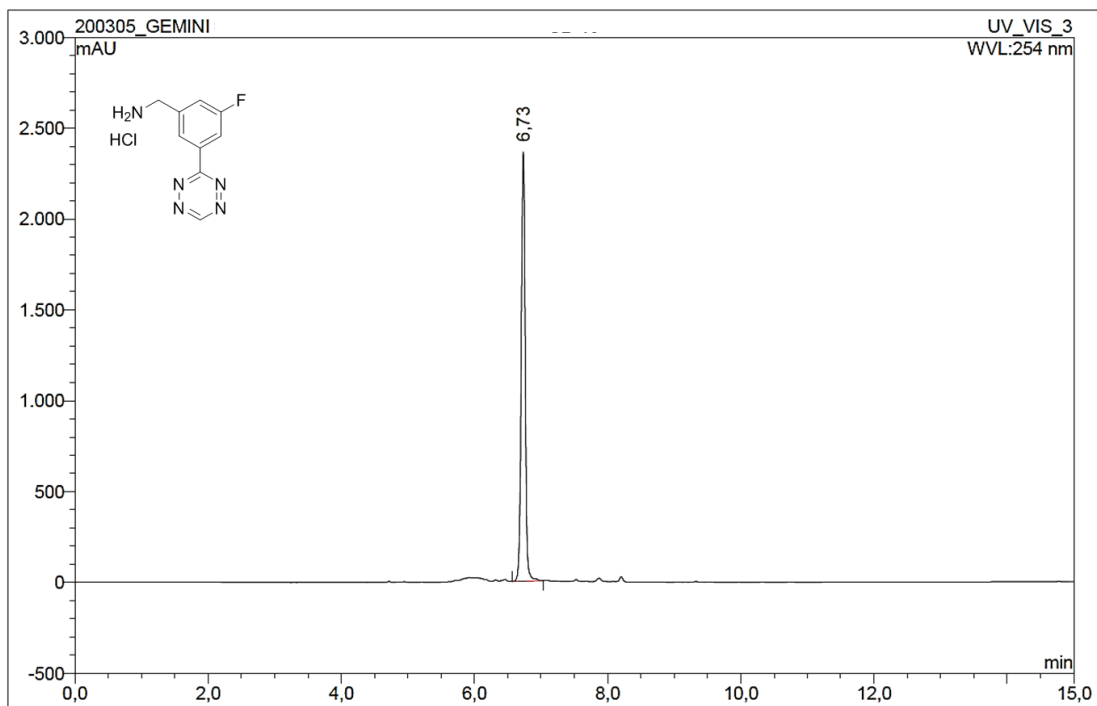

| No.           | Ret.Time<br>min | Peak Name | Height<br>mAU | Area<br>mAU*min | Rel.Area<br>% | Amount | Resolution(EP) |
|---------------|-----------------|-----------|---------------|-----------------|---------------|--------|----------------|
| 1             | 6,73            | n.a.      | 2362,307      | 165,992         | 100,00        | n.a.   | n.a.           |
| <b>Total:</b> |                 |           | 2362,307      | 165,992         | 100,00        | 0,000  |                |

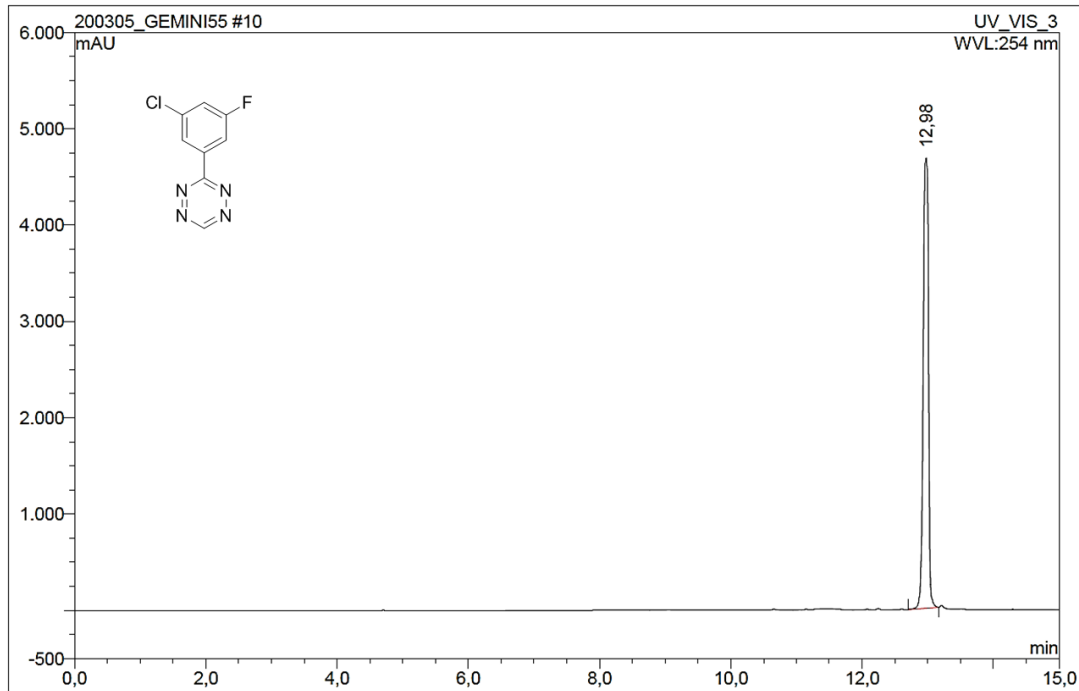

| No.           | Ret.Time<br>min | Peak Name | Height<br>mAU | Area<br>mAU*min | Rel.Area<br>% | Amount | Resolution(EP) |
|---------------|-----------------|-----------|---------------|-----------------|---------------|--------|----------------|
| 1             | 12,98           | n.a.      | 4673,961      | 443,126         | 100,00        | n.a.   | n.a.           |
| <b>Total:</b> |                 |           | 4673,961      | 443,126         | 100,00        | 0,000  |                |

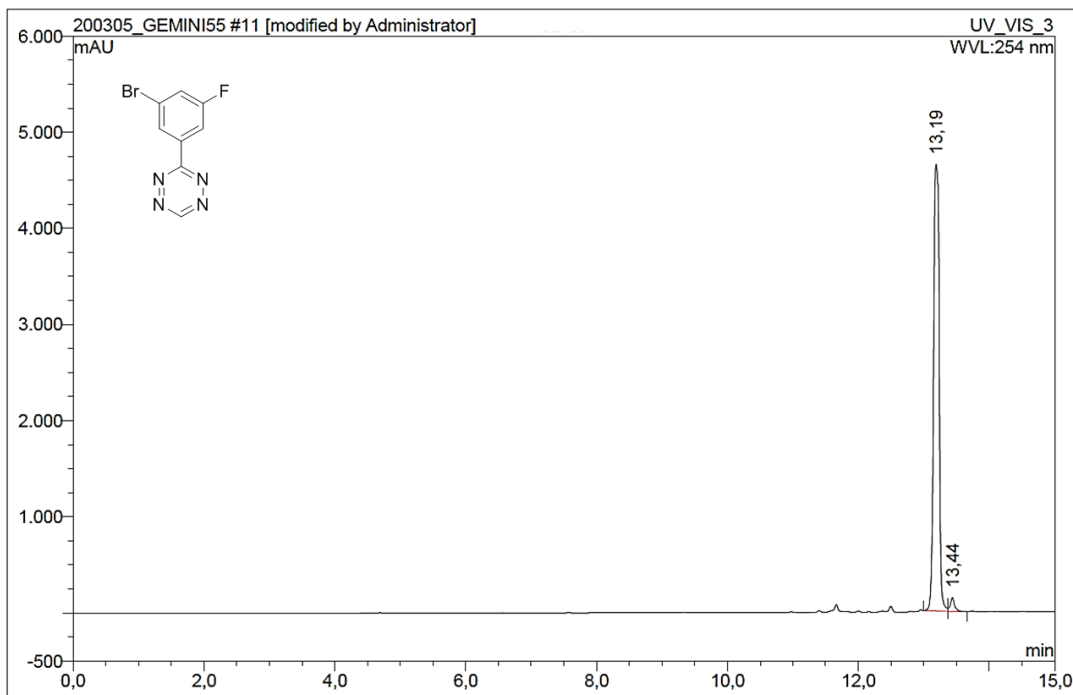

| No.           | Ret.Time<br>min | Peak Name | Height<br>mAU | Area<br>mAU*min | Rel.Area<br>% | Amount | Resolution(EP) |
|---------------|-----------------|-----------|---------------|-----------------|---------------|--------|----------------|
| 1             | 13,19           | n.a.      | 4646,392      | 460,544         | 97,83         | n.a.   | 1,94           |
| 2             | 13,44           | n.a.      | 140,238       | 10,235          | 2,17          | n.a.   | n.a.           |
| <b>Total:</b> |                 |           | 4786,630      | 470,779         | 100,00        | 0,000  |                |

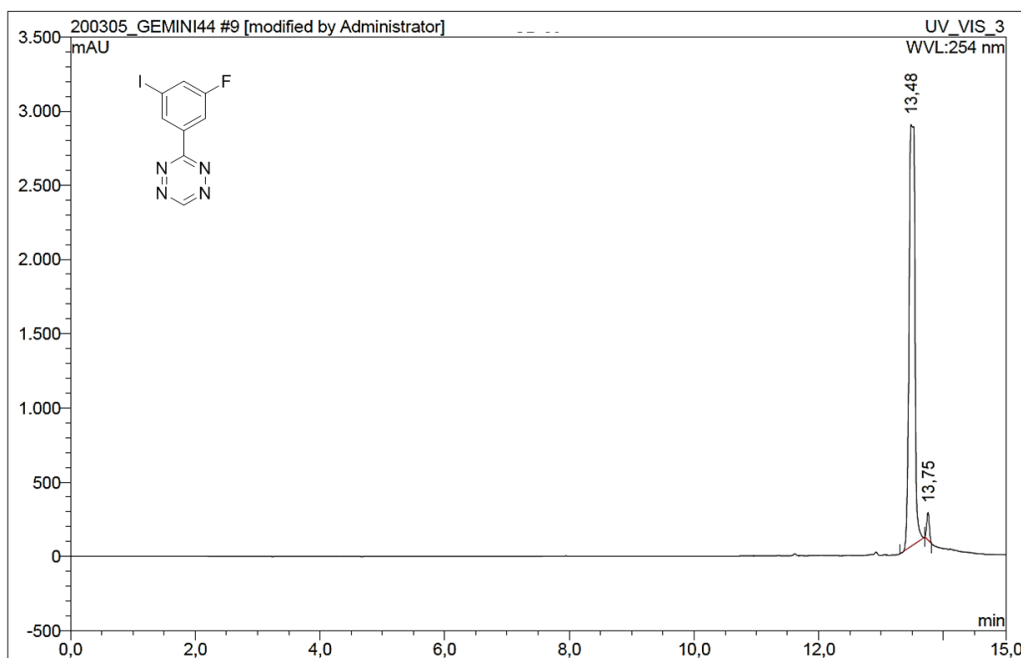

| No.           | Ret.Time<br>min | Peak Name | Height<br>mAU | Area<br>mAU*min | Rel.Area<br>% | Amount | Resolution(EP) |
|---------------|-----------------|-----------|---------------|-----------------|---------------|--------|----------------|
| 1             | 13,48           | n.a.      | 2841,578      | 312,274         | 97,12         | n.a.   | 2,16           |
| 2             | 13,75           | n.a.      | 187,303       | 9,253           | 2,88          | n.a.   | n.a.           |
| <b>Total:</b> |                 |           | 3028,882      | 321,527         | 100,00        | 0,000  |                |

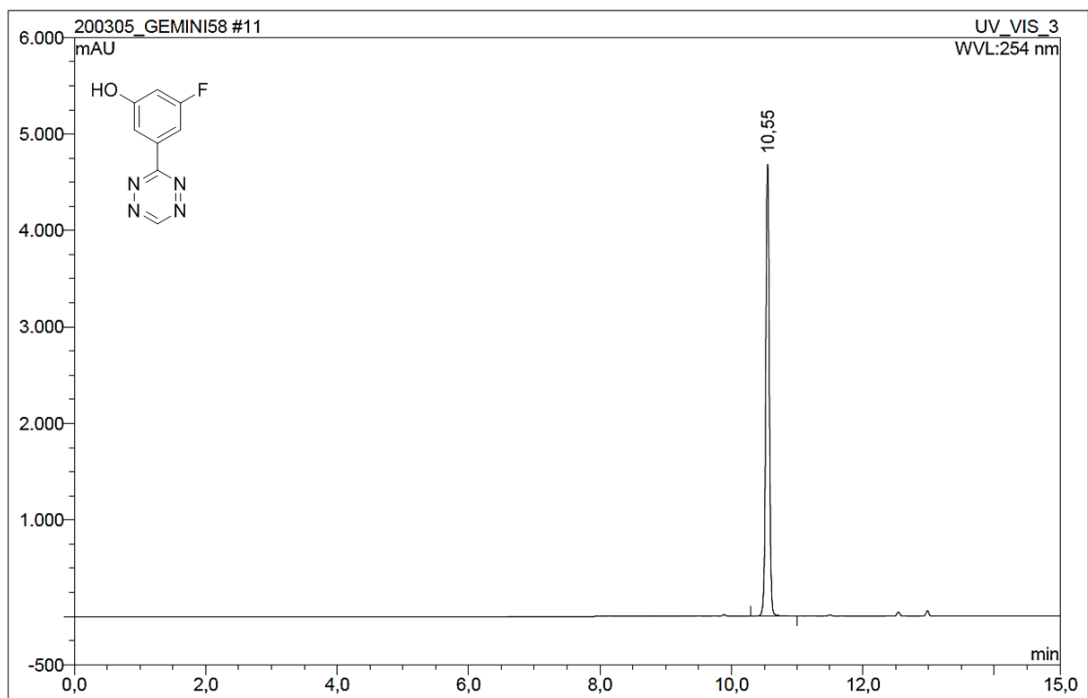

| No.           | Ret.Time<br>min | Peak Name | Height<br>mAU | Area<br>mAU*min | Rel.Area<br>% | Amount | Resolution(EP) |
|---------------|-----------------|-----------|---------------|-----------------|---------------|--------|----------------|
| 1             | 10,55           | n.a.      | 4683,745      | 303,152         | 100,00        | n.a.   | n.a.           |
| <b>Total:</b> |                 |           | 4683,745      | 303,152         | 100,00        | 0,000  |                |

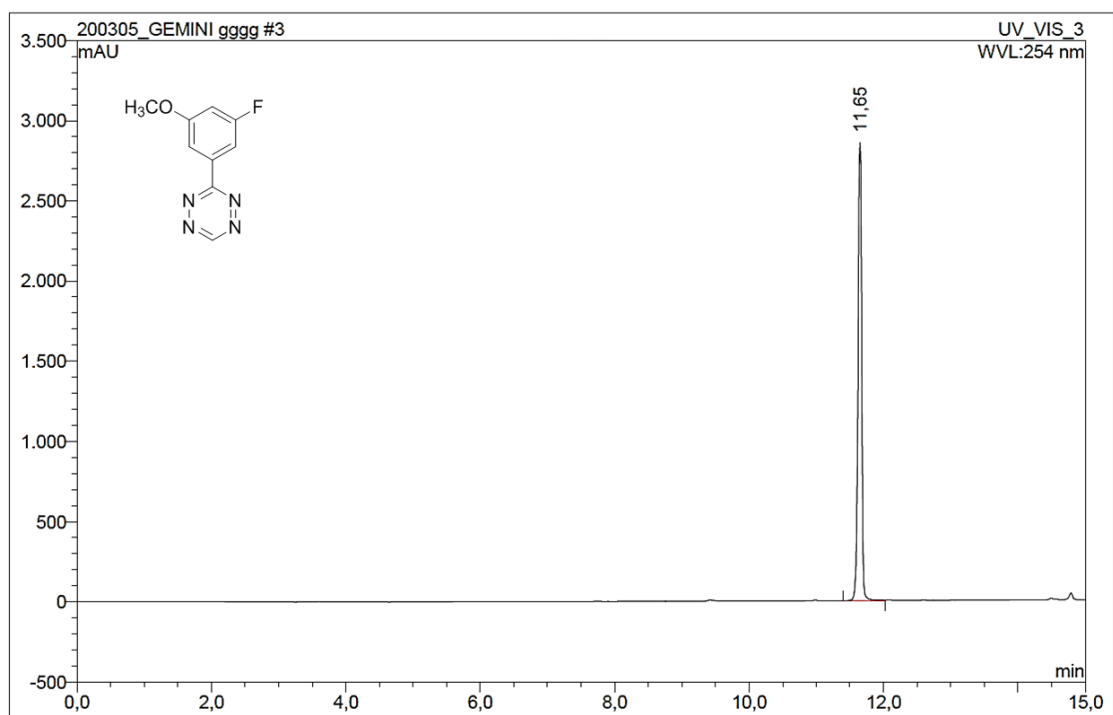

| No.           | Ret.Time<br>min | Peak Name | Height<br>mAU | Area<br>mAU*min | Rel.Area<br>% | Amount | Resolution(EP) |
|---------------|-----------------|-----------|---------------|-----------------|---------------|--------|----------------|
| 1             | 11,65           | n.a.      | 2855,952      | 185,883         | 100,00        | n.a.   | n.a.           |
| <b>Total:</b> |                 |           | 2855,952      | 185,883         | 100,00        | 0,000  |                |

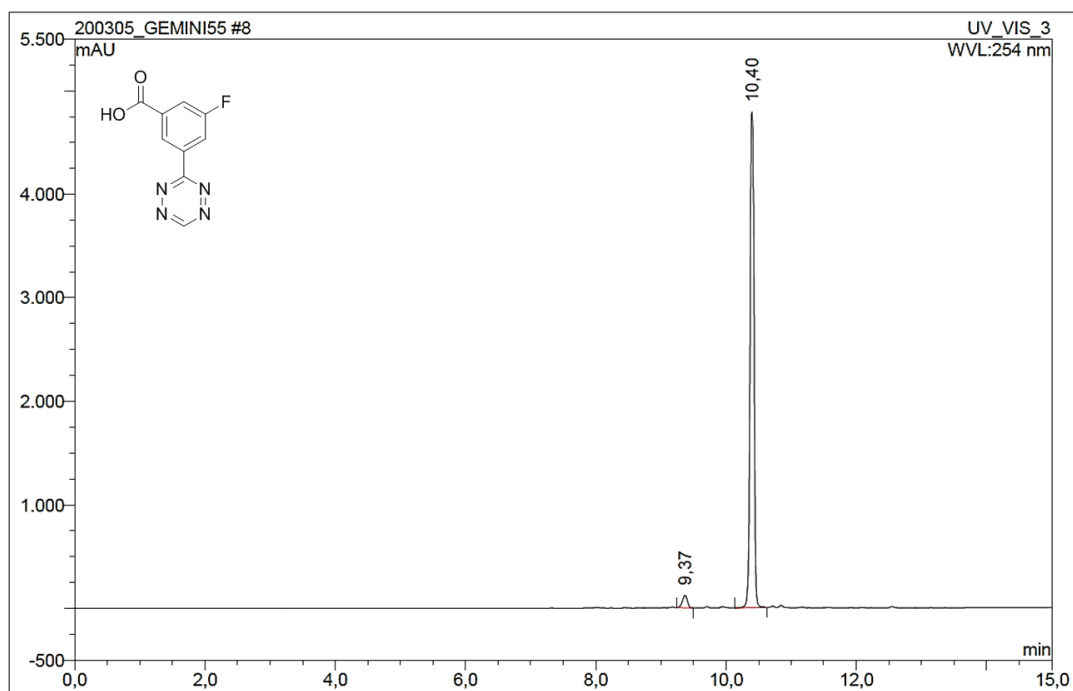

| No.           | Ret.Time<br>min | Peak Name | Height<br>mAU | Area<br>mAU*min | Rel.Area<br>% | Amount | Resolution(EP) |
|---------------|-----------------|-----------|---------------|-----------------|---------------|--------|----------------|
| 1             | 9,37            | n.a.      | 121,321       | 10,980          | 3,22          | n.a.   | 8,12           |
| 2             | 10,40           | n.a.      | 4787,636      | 329,674         | 96,78         | n.a.   | n.a.           |
| <b>Total:</b> |                 |           | 4908,957      | 340,653         | 100,00        | 0,000  |                |

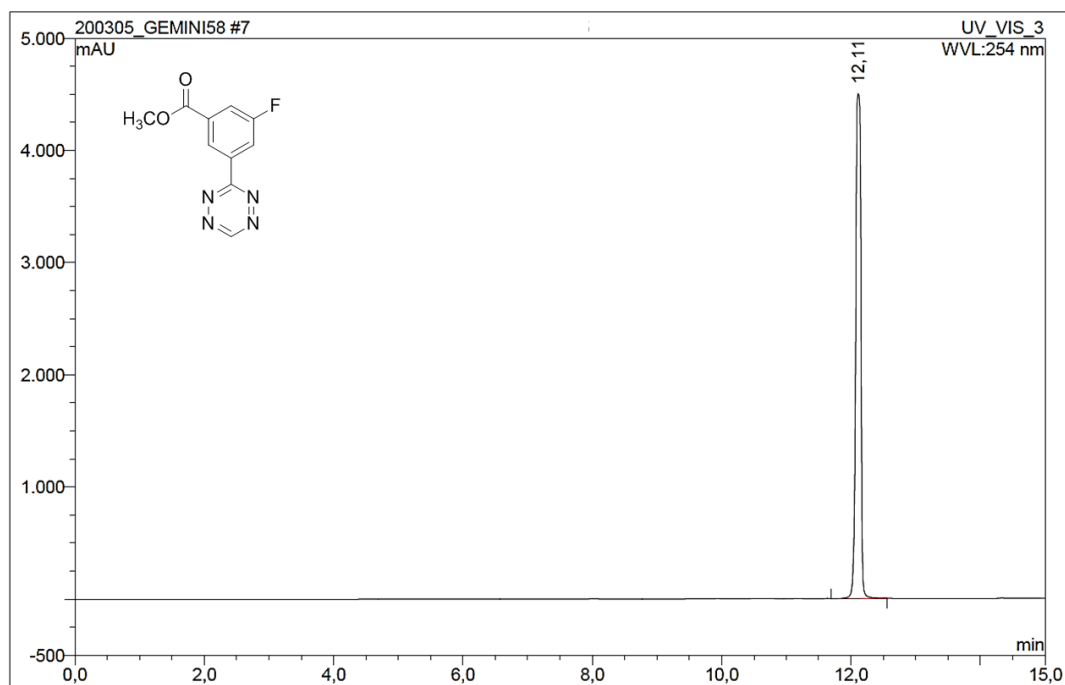

| No.           | Ret.Time<br>min | Peak Name | Height<br>mAU | Area<br>mAU*min | Rel.Area<br>% | Amount | Resolution(EP) |
|---------------|-----------------|-----------|---------------|-----------------|---------------|--------|----------------|
| 1             | 12,11           | n.a.      | 4501,139      | 404,299         | 100,00        | n.a.   | n.a.           |
| <b>Total:</b> |                 |           | 4501,139      | 404,299         | 100,00        | 0,000  |                |

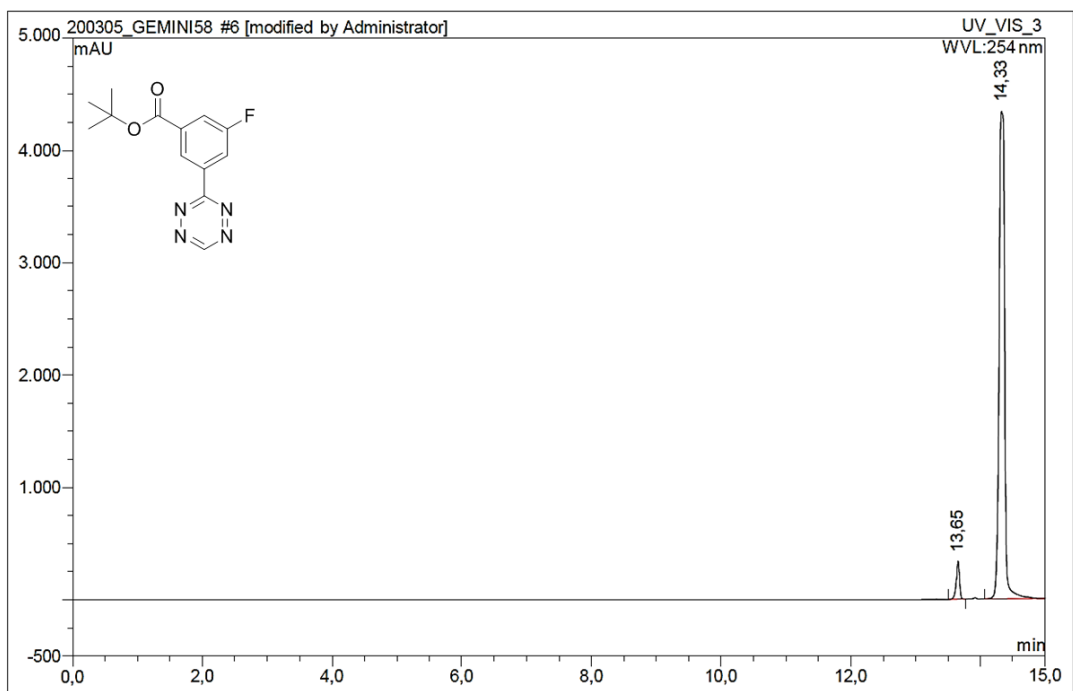

| No.           | Ret.Time<br>min | Peak Name | Height<br>mAU | Area<br>mAU*min | Rel.Area<br>% | Amount | Resolution(EP) |
|---------------|-----------------|-----------|---------------|-----------------|---------------|--------|----------------|
| 1             | 13,65           | n.a.      | 336,773       | 19,138          | 4,21          | n.a.   | 5,66           |
| 2             | 14,33           | n.a.      | 4335,405      | 435,111         | 95,79         | n.a.   | n.a.           |
| <b>Total:</b> |                 |           | 4672,178      | 454,249         | 100,00        | 0,000  |                |

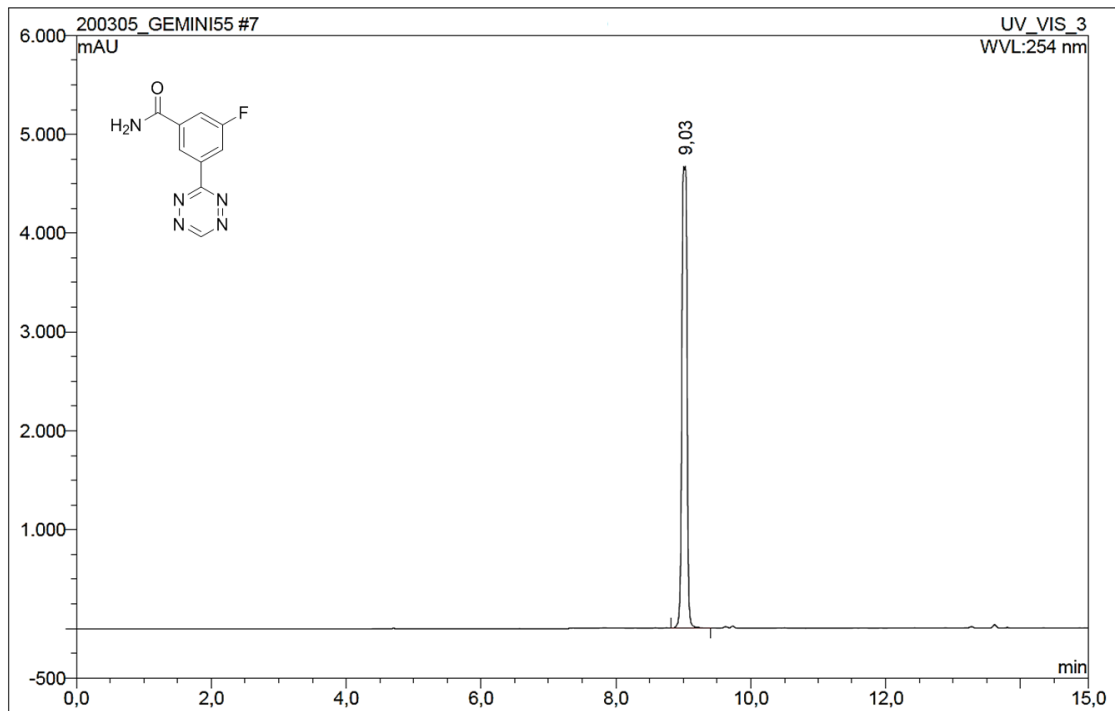

| No.           | Ret.Time<br>min | Peak Name | Height<br>mAU | Area<br>mAU*min | Rel.Area<br>% | Amount | Resolution(EP) |
|---------------|-----------------|-----------|---------------|-----------------|---------------|--------|----------------|
| 1             | 9,03            | n.a.      | 4674,329      | 415,956         | 100,00        | n.a.   | n.a.           |
| <b>Total:</b> |                 |           | 4674,329      | 415,956         | 100,00        | 0,000  |                |



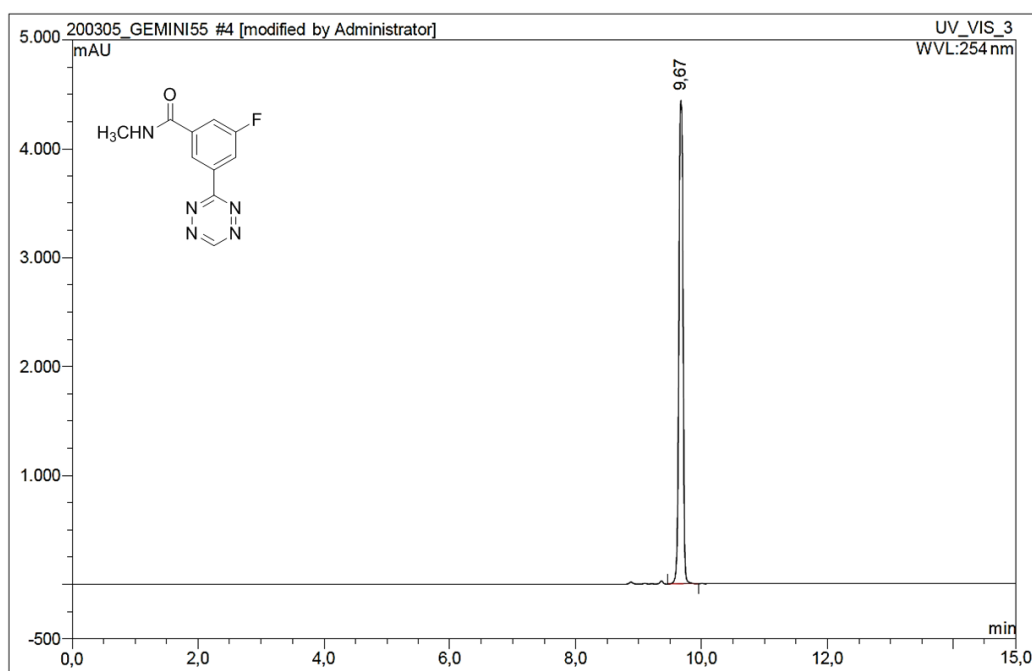

| No.           | Ret.Time<br>min | Peak Name | Height<br>mAU | Area<br>mAU*min | Rel.Area<br>% | Amount | Resolution(EP) |
|---------------|-----------------|-----------|---------------|-----------------|---------------|--------|----------------|
| 1             | 9,67            | n.a.      | 4439,383      | 329,694         | 100,00        | n.a.   | n.a.           |
| <b>Total:</b> |                 |           | 4439,383      | 329,694         | 100,00        | 0,000  |                |

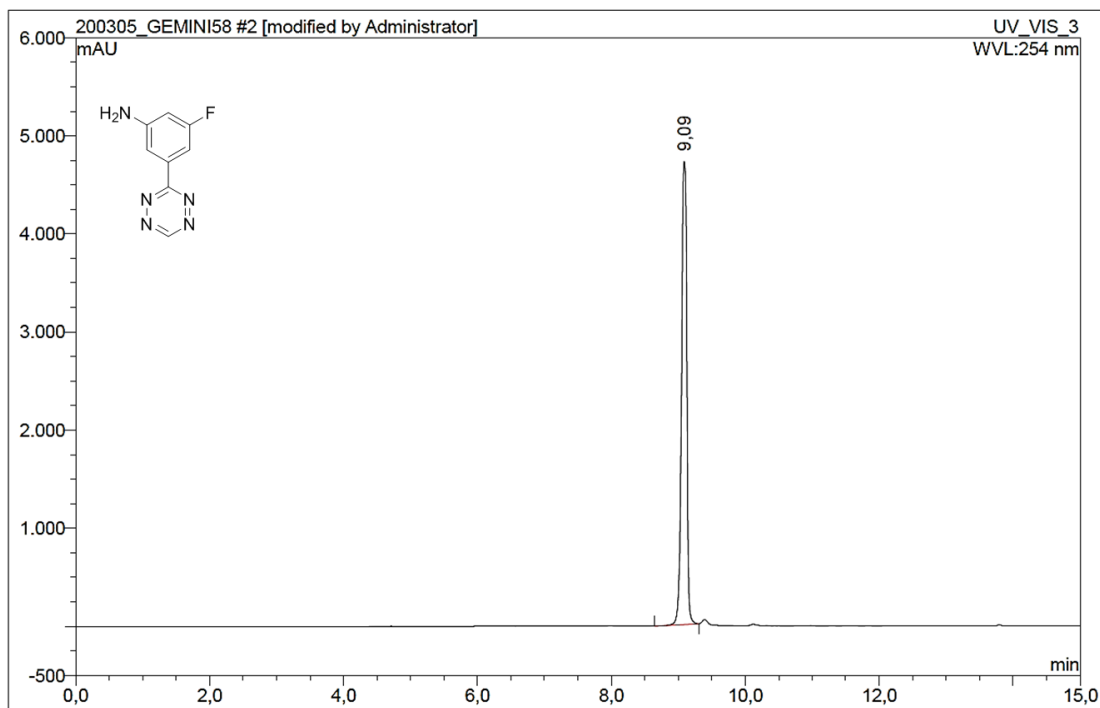

| No.           | Ret.Time<br>min | Peak Name | Height<br>mAU | Area<br>mAU*min | Rel.Area<br>% | Amount | Resolution(EP) |
|---------------|-----------------|-----------|---------------|-----------------|---------------|--------|----------------|
| 1             | 9,09            | n.a.      | 4719,630      | 422,525         | 100,00        | n.a.   | n.a.           |
| <b>Total:</b> |                 |           | 4719,630      | 422,525         | 100,00        | 0,000  |                |

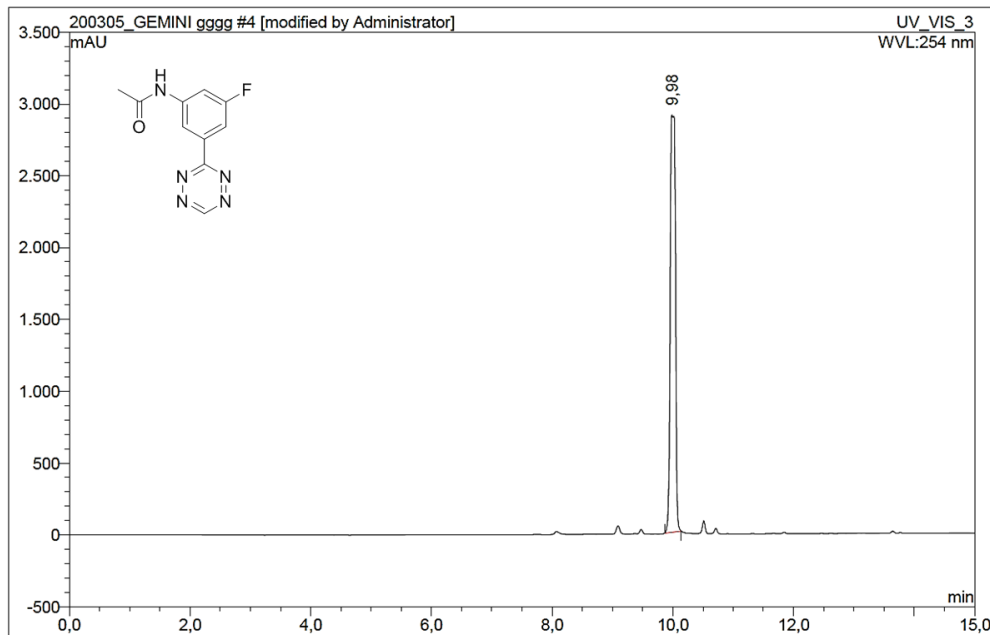

| No.           | Ret.Time<br>min | Peak Name | Height<br>mAU | Area<br>mAU*min | Rel.Area<br>% | Amount | Resolution(EP) |
|---------------|-----------------|-----------|---------------|-----------------|---------------|--------|----------------|
| 1             | 9,98            | n.a.      | 2906,144      | 287,377         | 100,00        | n.a.   | n.a.           |
| <b>Total:</b> |                 |           | 2906,144      | 287,377         | 100,00        | 0,000  |                |

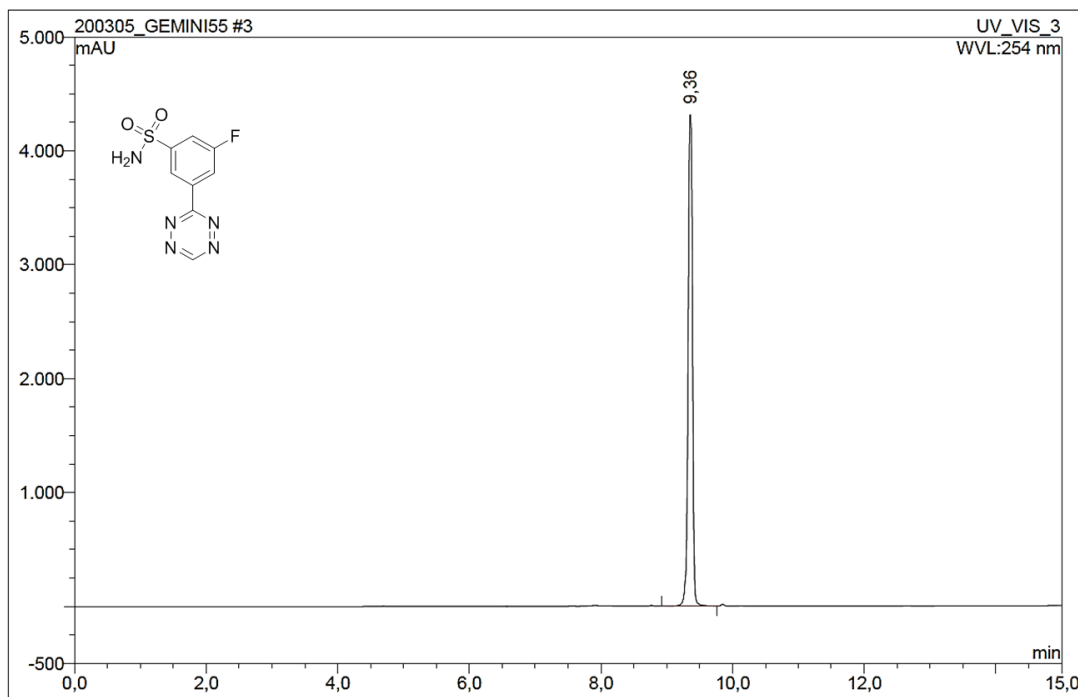

| No.           | Ret.Time<br>min | Peak Name | Height<br>mAU | Area<br>mAU*min | Rel.Area<br>% | Amount | Resolution(EP) |
|---------------|-----------------|-----------|---------------|-----------------|---------------|--------|----------------|
| 1             | 9,36            | n.a.      | 4316,048      | 342,894         | 100,00        | n.a.   | n.a.           |
| <b>Total:</b> |                 |           | 4316,048      | 342,894         | 100,00        | 0,000  |                |

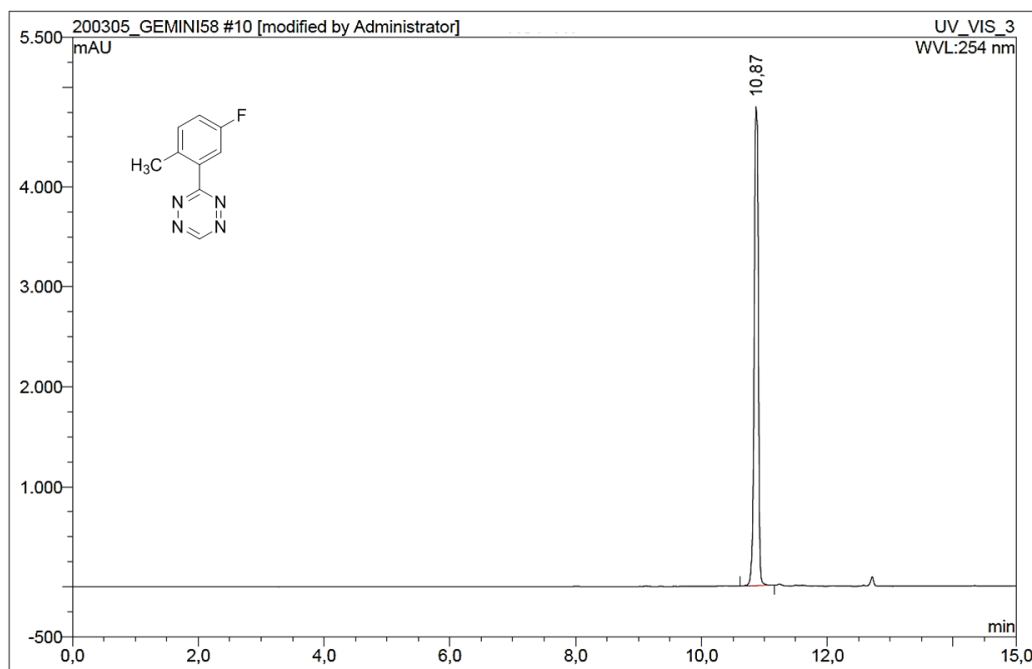

| No.           | Ret.Time<br>min | Peak Name | Height<br>mAU | Area<br>mAU*min | Rel.Area<br>% | Amount | Resolution(EP) |
|---------------|-----------------|-----------|---------------|-----------------|---------------|--------|----------------|
| 1             | 10,87           | n.a.      | 4790,359      | 370,750         | 100,00        | n.a.   | n.a.           |
| <b>Total:</b> |                 |           | 4790,359      | 370,750         | 100,00        | 0,000  |                |

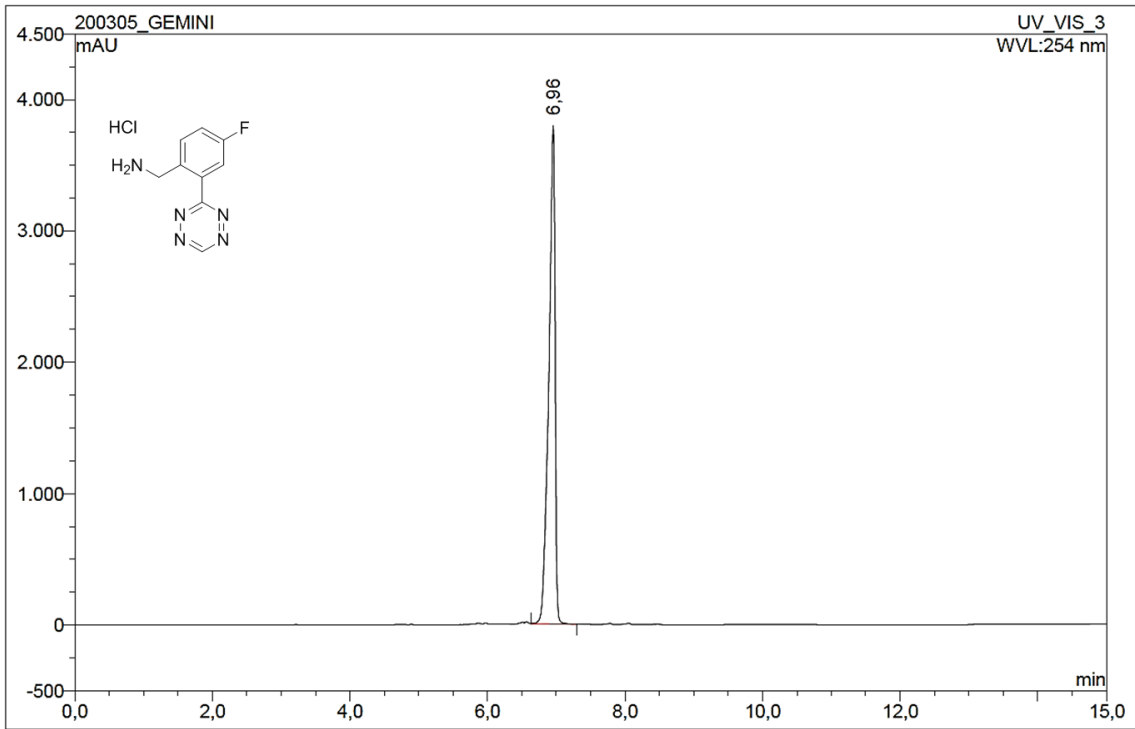

| No.           | Ret.Time<br>min | Peak Name | Height<br>mAU | Area<br>mAU*min | Rel.Area<br>% | Amount | Resolution(EP) |
|---------------|-----------------|-----------|---------------|-----------------|---------------|--------|----------------|
| 1             | 6,96            | n.a.      | 3793,131      | 410,000         | 100,00        | n.a.   | n.a.           |
| <b>Total:</b> |                 |           | 3793,131      | 410,000         | 100,00        | 0,000  |                |

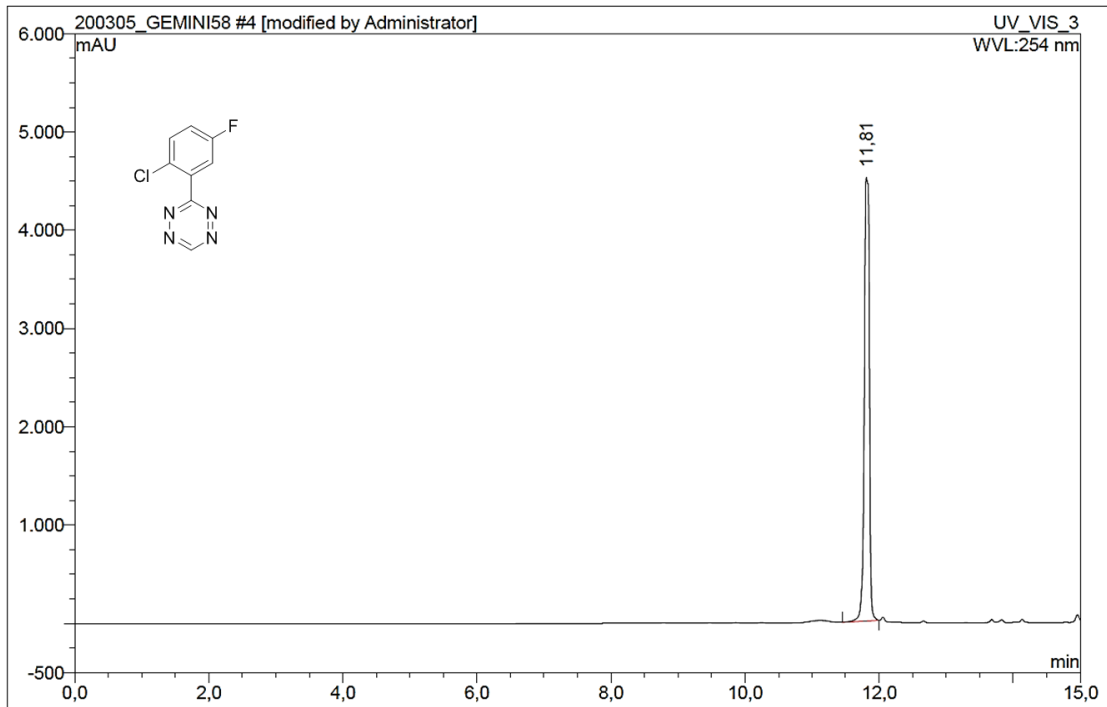

| No.           | Ret.Time<br>min | Peak Name | Height<br>mAU | Area<br>mAU*min | Rel.Area<br>% | Amount | Resolution(EP) |
|---------------|-----------------|-----------|---------------|-----------------|---------------|--------|----------------|
| 1             | 11,81           | n.a.      | 4513,036      | 407,347         | 100,00        | n.a.   | n.a.           |
| <b>Total:</b> |                 |           | 4513,036      | 407,347         | 100,00        | 0,000  |                |

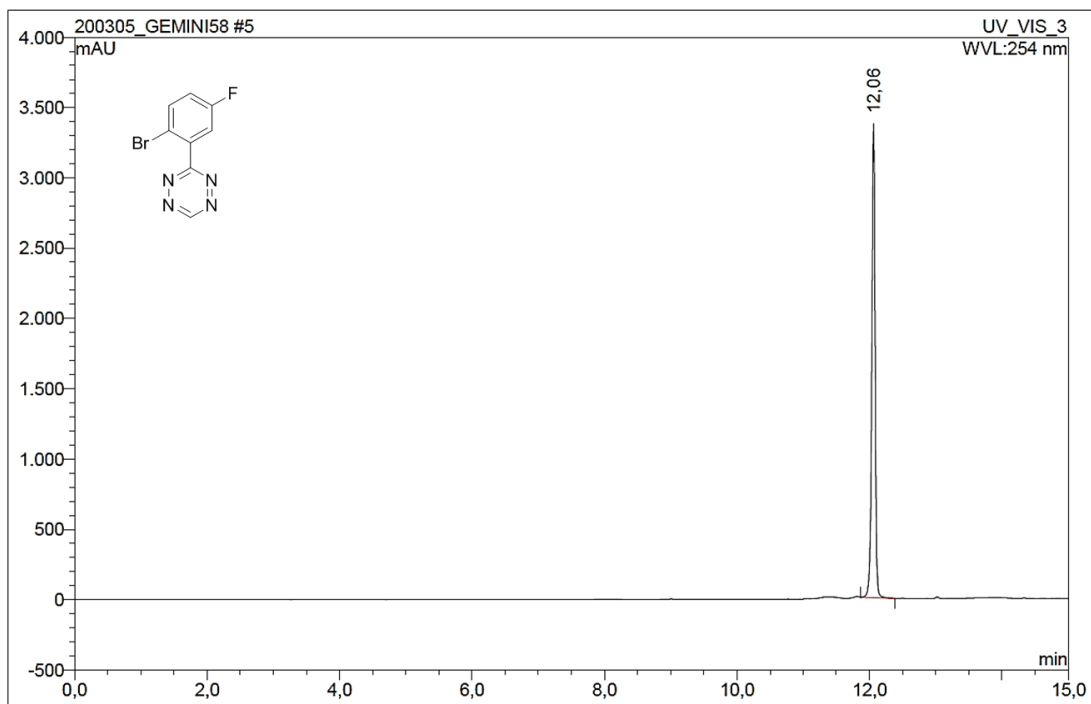

| No.           | Ret.Time<br>min | Peak Name | Height<br>mAU | Area<br>mAU*min | Rel.Area<br>% | Amount | Resolution(EP) |
|---------------|-----------------|-----------|---------------|-----------------|---------------|--------|----------------|
| 1             | 12,06           | n.a.      | 3374,109      | 198,828         | 100,00        | n.a.   | n.a.           |
| <b>Total:</b> |                 |           | 3374,109      | 198,828         | 100,00        | 0,000  |                |

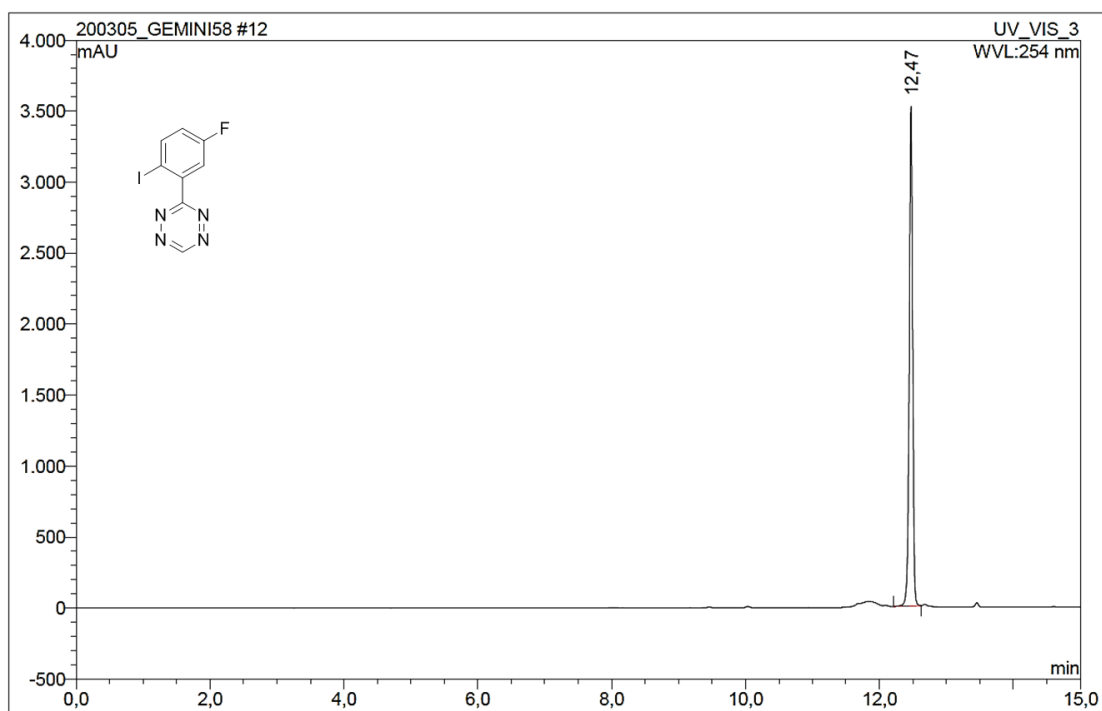

| No.           | Ret.Time<br>min | Peak Name | Height<br>mAU | Area<br>mAU*min | Rel.Area<br>% | Amount | Resolution(EP) |
|---------------|-----------------|-----------|---------------|-----------------|---------------|--------|----------------|
| 1             | 12,47           | n.a.      | 3522,036      | 202,789         | 100,00        | n.a.   | n.a.           |
| <b>Total:</b> |                 |           | 3522,036      | 202,789         | 100,00        | 0,000  |                |

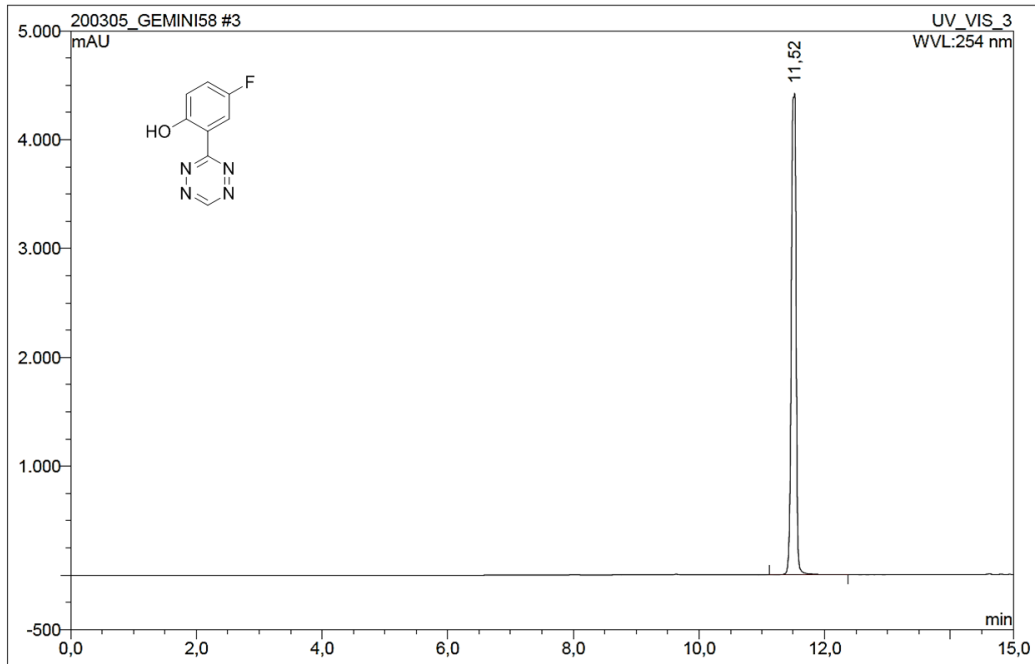

| No.           | Ret.Time<br>min | Peak Name | Height<br>mAU | Area<br>mAU*min | Rel.Area<br>% | Amount | Resolution(EP) |
|---------------|-----------------|-----------|---------------|-----------------|---------------|--------|----------------|
| 1             | 11,52           | n.a.      | 4425,163      | 388,582         | 100,00        | n.a.   | n.a.           |
| <b>Total:</b> |                 |           | 4425,163      | 388,582         | 100,00        | 0,000  |                |

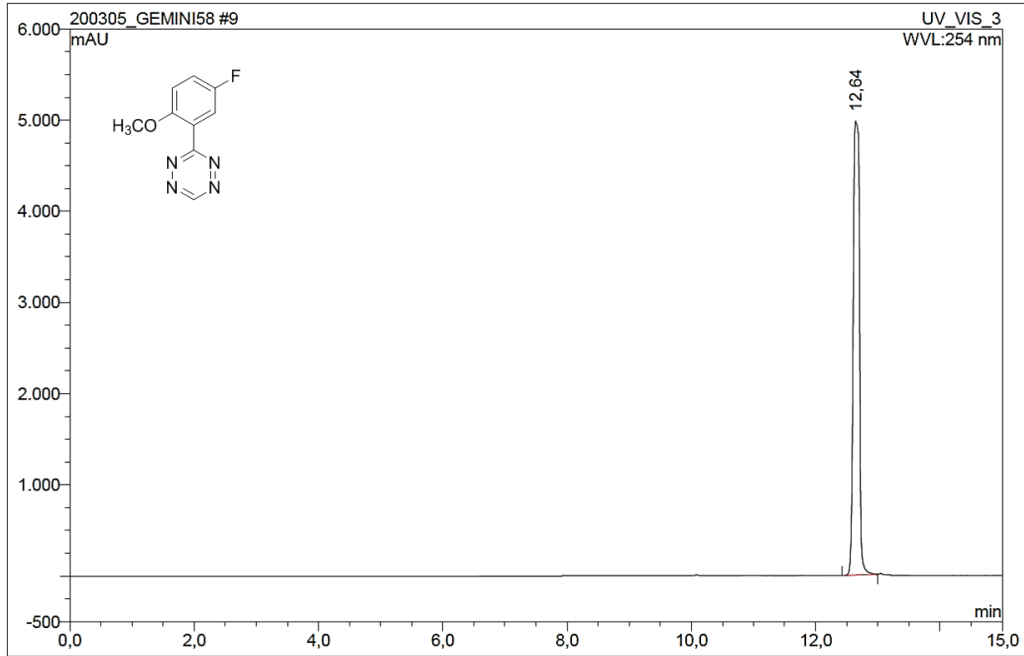

| No.           | Ret.Time<br>min | Peak Name | Height<br>mAU | Area<br>mAU*min | Rel.Area<br>% | Amount | Resolution(EP) |
|---------------|-----------------|-----------|---------------|-----------------|---------------|--------|----------------|
| 1             | 12,64           | n.a.      | 4981,204      | 567,379         | 100,00        | n.a.   | n.a.           |
| <b>Total:</b> |                 |           | 4981,204      | 567,379         | 100,00        | 0,000  |                |
